# Supplementary material for: Photoorganocatalytic trifluoromethylation of (het)arenes in green conditions
Source: publisher site journal article supplement (doi:10.3762/bjoc.22.50), 2026-04-30
Supplement: Additional file 1 [file 1860-5397-22-50-S1.pdf]

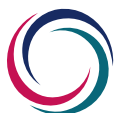

## Supporting Information

for

### Photoorganocatalytic trifluoromethylation of (het)arenes in green conditions

Egor N. Boronin, Svetlana E. Kaurkina, Milena M. Svetlakova, Anton S. Bolshakov, Maxim V. Arsenyev, Vasilii F. Otvagin, Alexey Yu. Fedorov, Timothy Noël and Alexander V. Nyuchev

*Beilstein J. Org. Chem.* **2026**, *22*, 662–671. doi:10.3762/bjoc.22.50

### Experimental part, copies of NMR spectra and computational data

## Table of contents

|                                                 |      |
|-------------------------------------------------|------|
| 1. Materials and methods .....                  | S2   |
| 2. General procedure .....                      | S7   |
| 3. Optimization.....                            | S10  |
| 4. Radical trapping.....                        | S13  |
| 5. Scaling-up .....                             | S16  |
| 6. Photophysical investigations.....            | S21  |
| 7. Stern–Volmer quenching studies .....         | S21  |
| 8. Synthesis of starting materials .....        | S25  |
| 9. Scope and characterization of products ..... | S26  |
| 10. NMR spectra.....                            | S57  |
| 11. Computational data .....                    | S104 |
| 12. References.....                             | S120 |

## 1. Materials and methods

Commercially available reagents were purchased from Sigma-Aldrich, Alfa Aesar, Abcr, Acros Organics and used without further purification. Other substrates were prepared by using the reported procedures and purified through column chromatography respectively. The catalyst 3DPAFIPN was prepared according to a published procedure [1]. Solvents were purified according to standard procedures. Ethyl acetate (EtOAc) was purified by distillation over phosphorus(V) oxide and stored over molecular sieves 4 Å under an argon atmosphere.

Analytical thin-layer chromatography (TLC) was performed on aluminum plates coated with 0.20 mm silica gel 60 with fluorescent indicator UV<sub>254</sub> (Macherey-Nagel). Visualization of developed plates was performed under UV light (254 nm, 365 nm) and/or vanillin stains. Column chromatography was performed using Silica 60 (0.063–0.2 mm, Macherey-Nagel).

<sup>1</sup>H NMR spectra were recorded at 400 MHz (Agilent DD2 400) in CDCl<sub>3</sub> (δ = 7.26 ppm) and DMSO-*d*<sub>6</sub> (δ = 2.50 ppm) and referenced internally to the corresponding residual solvent signals. <sup>13</sup>C NMR spectra were recorded at 101 MHz, chemical shifts were reported in ppm on the δ scale relative to CDCl<sub>3</sub> (δ = 77.16 ppm). For quantitative <sup>19</sup>F NMR, 0.3 mL of resulting solution was transferred to NMR tube and diluted with 0.3 mL of deuterated solvents (CDCl<sub>3</sub> or DMSO-*d*<sub>6</sub>). Quantitative q<sup>19</sup>F NMR spectra were recorded on 4 scans and d1 = 25 s. Chemical shifts are reported in parts per million (ppm) relative to internal standard C<sub>6</sub>H<sub>5</sub>CF<sub>3</sub> (–62.9 ppm in CDCl<sub>3</sub> or –62.2 ppm in DMSO-*d*<sub>6</sub>).

Coupling constants are reported in Hz with multiplicities denoted as s (singlet), d (doublet), t (triplet), q (quartet), hept (heptet), m (multiplet).

Fluorescence measurements were acquired at room temperature using a Shimadzu RF-6000 spectrofluorophotometer. The absorbance spectrum of 3DPAFIPN was recorded using a Shimadzu UV-1800 UV–vis spectrophotometer.

GC–MS spectra were recorded using an QP 2010 plus (Shimadzu) equipped with an Rtx-5MS capillary column (length 60 m; inner diameter 0.32 mm). The injector temperature was set at 250 °C, the detector temperature was 250 °C.

The photochemical reactor consists of a blue diode strip 450 nm (120 diodes/meter SMD 5054 chip, 12 V, 82 klx, total electric power 30–34 W). The reactor supplied a powerful fan (FANOVER, FD9225S12M, 4.8 W, 3000 rpm). 3 m of LED strip were coiled in a 3D-printed (PLA) reactor with an inner diameter of 10 cm [1].

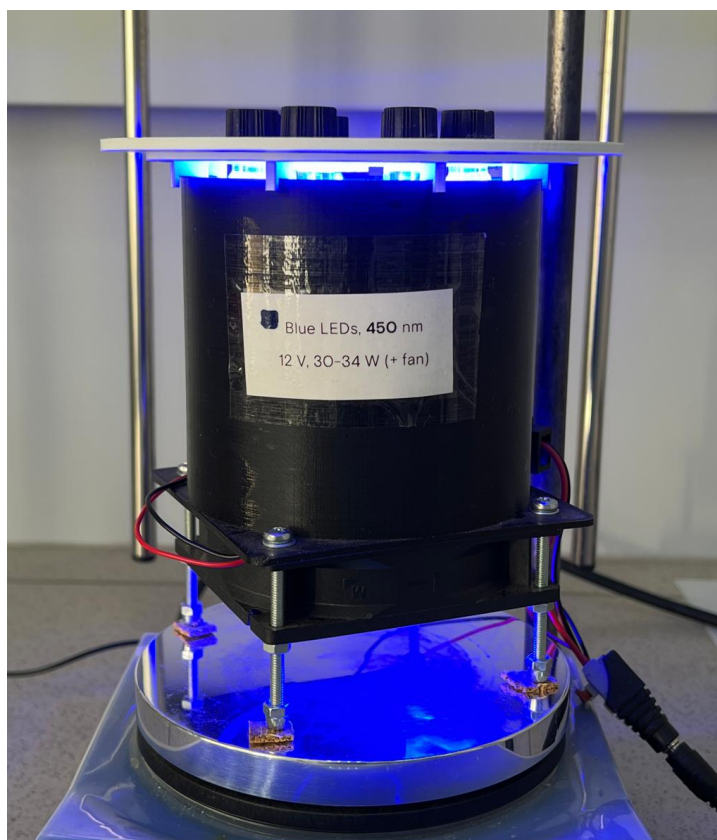

**Figure S1.** The 3D-printed photoreactor (blue diodes, 450 nm)

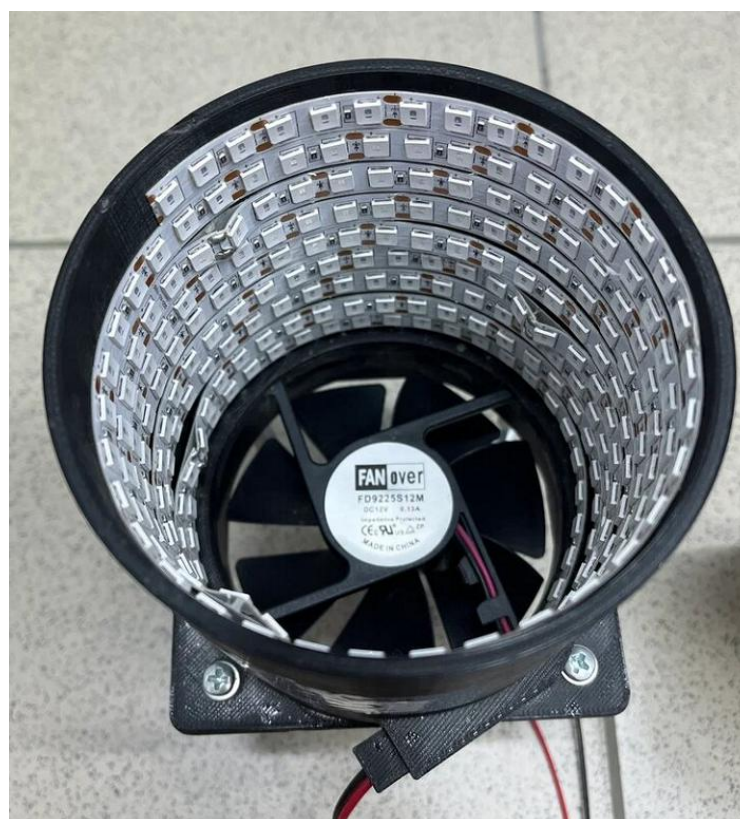

**Figure S2.** An inside of 3D-printed photoreactor with cooling fan in “off” state

The vial holder (lid) is designed to leave a gap for effective cooling by the air flow from the fan. The temperature inside the reactor (Figure S3) is slightly higher (24.2 °C) than environment temperature (23.5 °C).

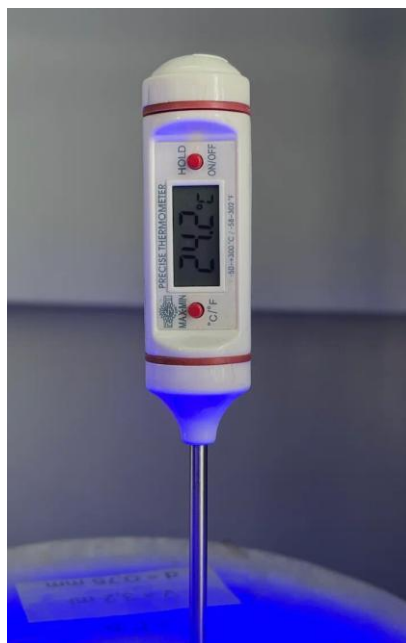

**Figure S3.** Temperature measurement inside the photoreactor

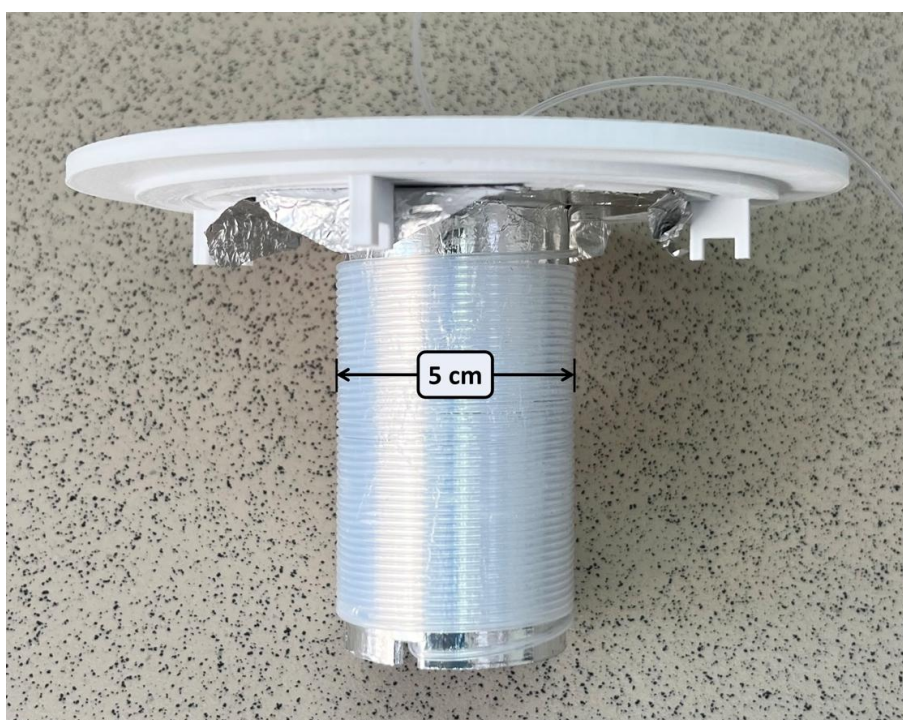

**Figure S4.** Flow microreactors made of fluorinated ethylene propylene (FEP) tubes  
(i.d. = 0.75 mm,  $V = 3.0$  mL)

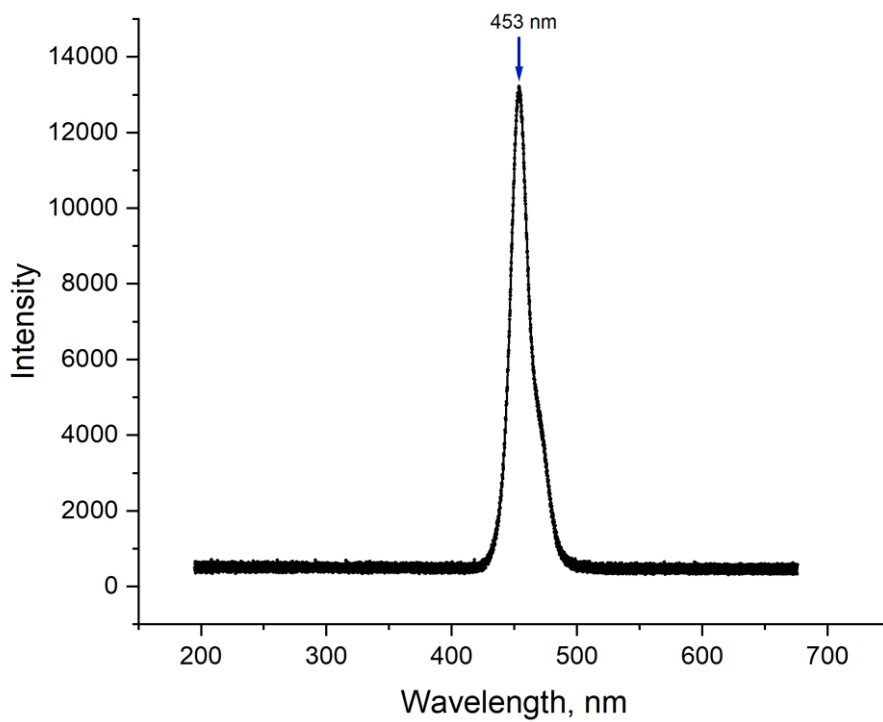

**Figure S5.** The emission spectrum of the blue LEDs strip ( $\lambda_{\text{max}}= 453 \text{ nm}$ )

Emission spectra of other LEDs:

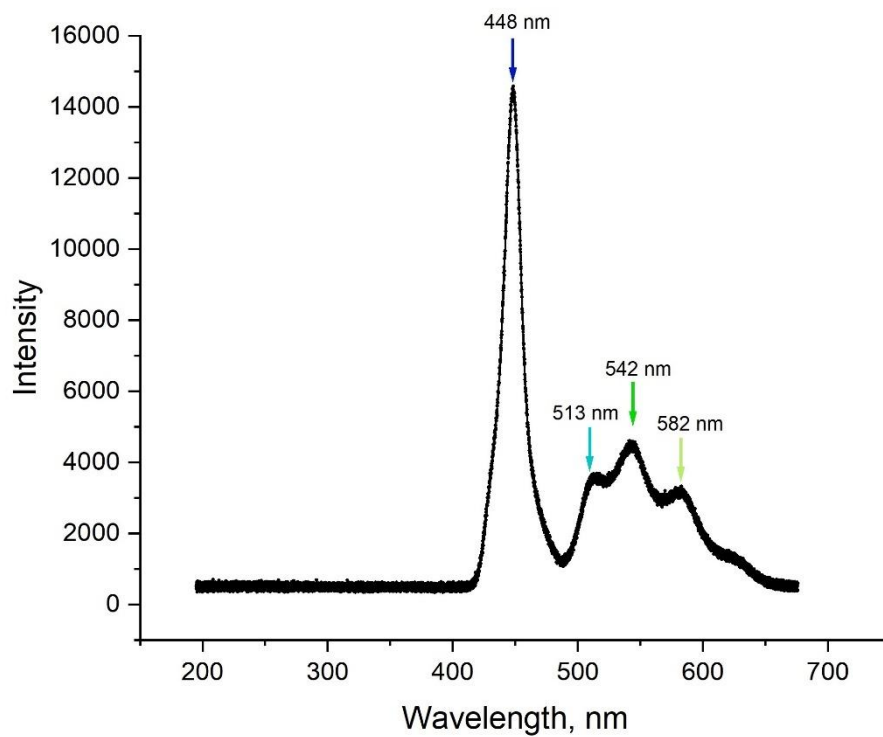

**Figure S6.** The emission spectrum of the white LEDs strip ( $\lambda_{\text{max}}= 448 \text{ nm}$ )

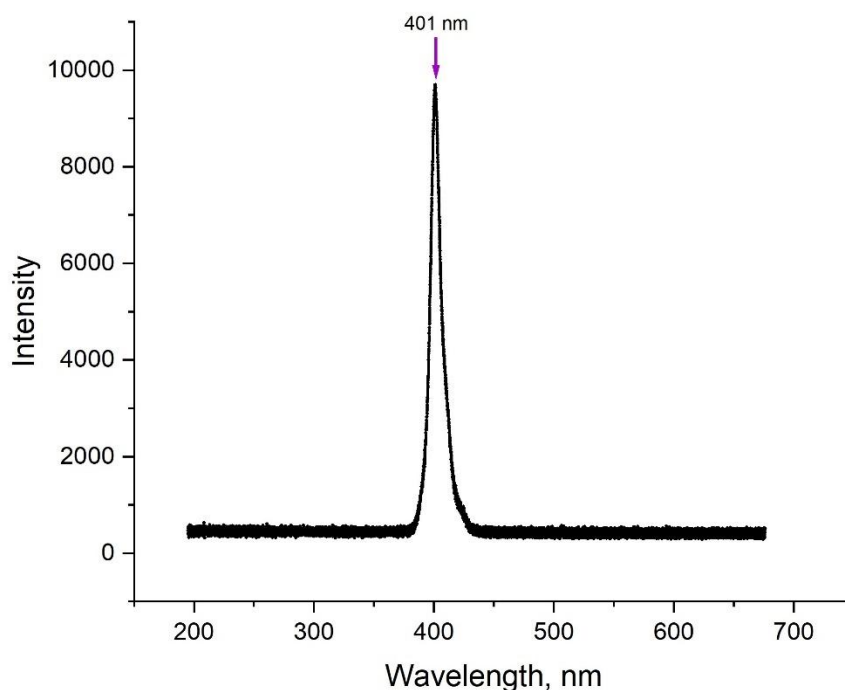

**Figure S7.** The emission spectrum of the violet LEDs strip ( $\lambda_{\text{max}} = 401 \text{ nm}$ )

**Table S1.** Comparison of atom efficiency and prices of the  $\text{CF}_3$  sources

|   | $\text{CF}_3$ -source                          | CAS         | Product No. | Price              | Price <sup>#</sup><br>(USD/mol $\text{CF}_3$ ) | Atom<br>efficiency* (%) |
|---|------------------------------------------------|-------------|-------------|--------------------|------------------------------------------------|-------------------------|
| 1 | TFA                                            | 76-05-1     | 8.0826      | 539 USD per 1 L    | 41                                             | 60.5                    |
| 2 | TFAA                                           | 407-25-0    | 8.08261     | 489 USD per 500 mL | 139                                            | 32.9 <sup>§</sup>       |
| 3 | $\text{CF}_3\text{I}$                          | 2314-97-8   | 171441      | 499 USD per 100 g  | 978                                            | 35.2                    |
| 4 | $\text{TfCl}$                                  | 421-83-0    | 164798      | 289 USD per 25 g   | 1948                                           | 41.0                    |
| 5 | Langlois reagent                               | 2926-29-6   | 743232      | 275 USD per 25 g   | 1717                                           | 44.2                    |
| 6 | Ruppert – Prakash reagent ( $\text{TMSCF}_3$ ) | 81290-20-2  | 488712      | 401 USD per 25 mL  | 2371                                           | 48.5                    |
| 7 | Umemoto reagent                                | 131880-16-5 | 483869      | 166 USD per 1 g    | 56452                                          | 20.3                    |
| 8 | Togni's Reagent                                | 887144-97-0 | 696641      | 938 USD per 5 g    | 61925                                          | 20.9                    |

\* – Atom efficiency calculated as ratio of  $M(\text{CF}_3) = 69.01 \text{ g/mol}$  to molar weight of corresponding  $\text{CF}_3$ -source.

<sup>#</sup> – Prices in US dollars per 1 mol are given according to Sigma-Aldrich web site and actual for USA on 4th February, 2026.

<sup>§</sup> – In case the only  $\text{CF}_3$ -group transfer into product.

**Table S2.** Comparison of the cost of photocatalysts

|   | Photocatalyst                                         | CAS          | Product No.  | Price              | Price (USD/mmol) |
|---|-------------------------------------------------------|--------------|--------------|--------------------|------------------|
| 1 | Ir(ppy) <sub>3</sub>                                  | 94928-86-6   | 688096       | 443 USD per 250 mg | 1160             |
| 2 | [Ru(phen) <sub>3</sub> ]Cl <sub>2</sub>               | 23570-43-6   | 904767       | 227 USD per 250 mg | 647              |
| 3 | 3DPAFIPN                                              | 2260543-73-3 | 908177       | 441 USD per 500 mg | 571              |
| 4 | Tetrafluoroisophthalonitrile (3DPAFIPN precursor)     | 2377-81-3    | CIAH987F07E6 | 11 USD per 1000 mg | 2.2              |
| 5 | 3DPAFIPN (synthesized; taking into account the costs) | 2260543-73-3 | 908177       | 15 USD per 500 mg  | 19.4             |

## 2. General procedure

*For solid substrates:* A 7.5 mL Pyrex tube (No. 99447) equipped with a magnetic stirring bar was charged with 3DPAFIPN (0.02 equiv, 0.006 mmol, 3.9 mg) and the solid substrate (1 equiv, 0.3 mmol). Then the atmosphere inside the vial was changed into argon. Dry ethyl acetate (3 mL) was added using a syringe under argon atmosphere via PTFE/silicone septa and then CF<sub>3</sub> reagent TFAA (3 equiv, 0.9 mmol, 125  $\mu$ L) was added. A stream of argon was bubbled through the reaction mixture for 1 minute in an ultrasonic bath. The reaction vial was placed in the photoreactor zone (blue LEDs,  $\lambda$  = 450 nm) and irradiated for 6 h. After the reaction, 20  $\mu$ L (23.8 mg, 0.163 mmol) of benzotrifluoride (C<sub>6</sub>H<sub>5</sub>CF<sub>3</sub>) was added as standard to the mixture and the mixture stirred for 1 minute. For quantitative <sup>19</sup>F NMR 0.3 mL of the resulting solution was transferred to an NMR tube and diluted with 0.3 mL of deuterated solvent (DMSO-*d*<sub>6</sub> or CDCl<sub>3</sub>).

*For liquid substrates:* The liquid substrate was added using a micropipette immediately after dry ethyl acetate. A 7.5 mL Pyrex tube (No. 99447) equipped with a magnetic stirring bar was charged with 3DPAFIPN (0.02 equiv, 0.006 mmol, 3.9 mg). Then the atmosphere inside the vial was changed into argon. Dry ethyl acetate (3 mL) was added using syringe under argon atmosphere via PTFE/silicone septa. Then using a micropipette, the liquid substrate (1 equiv, 0.3 mmol) and CF<sub>3</sub> reagent TFAA (3 equiv, 0.9 mmol, 125  $\mu$ L) were added. A stream of argon was bubbled through the reaction mixture for 1 minute in an ultrasonic bath. The reaction vial was placed in the photoreactor zone (blue LEDs,  $\lambda$  = 450 nm) and irradiated for 6 h. After the reaction, 20  $\mu$ L (23.8 mg, 0.163 mmol) of benzotrifluoride (C<sub>6</sub>H<sub>5</sub>CF<sub>3</sub>) was added as standard to the mixture and the mixture stirred for 1 minute. For quantitative <sup>19</sup>F NMR 0.3 mL of the resulting solution

was transferred to an NMR tube and diluted with 0.3 mL of deuterated solvent (DMSO- $d_6$  or  $CDCl_3$ ).

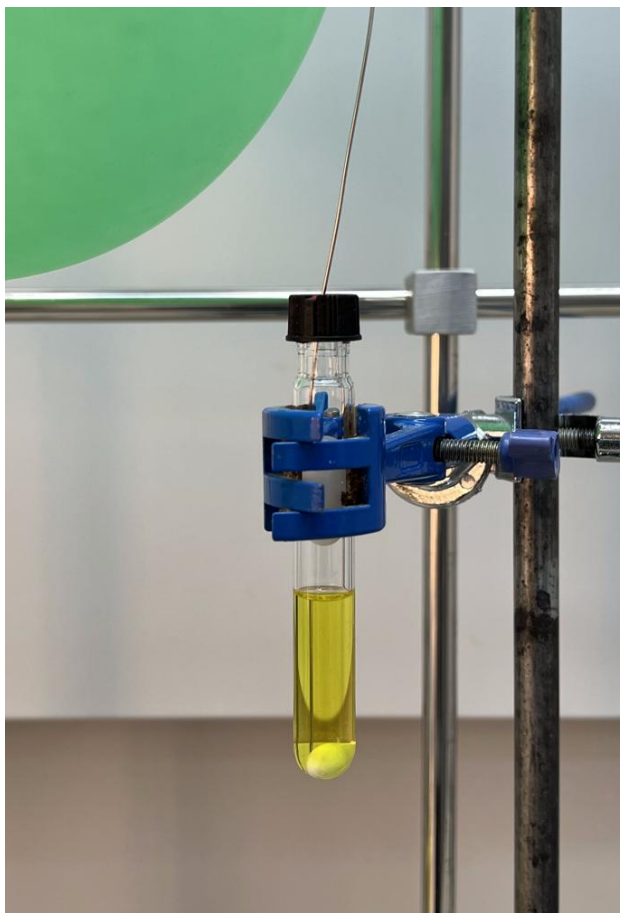

**Figure S8.** The reaction mixture in a 7.5 mL Pyrex tube

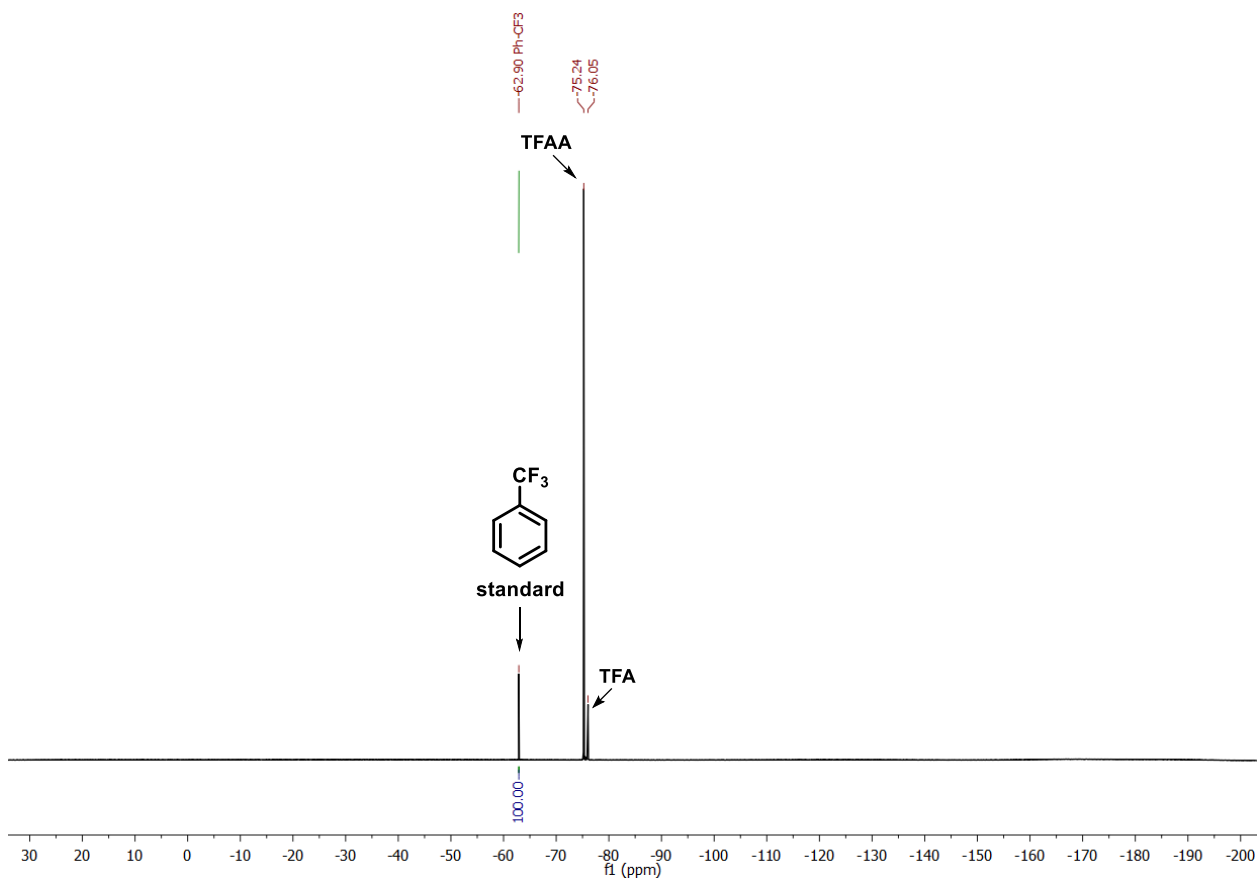

<sup>19</sup>F NMR spectrum of standard (benzotrifluoride) in CDCl<sub>3</sub>/EtOAc with TFAA

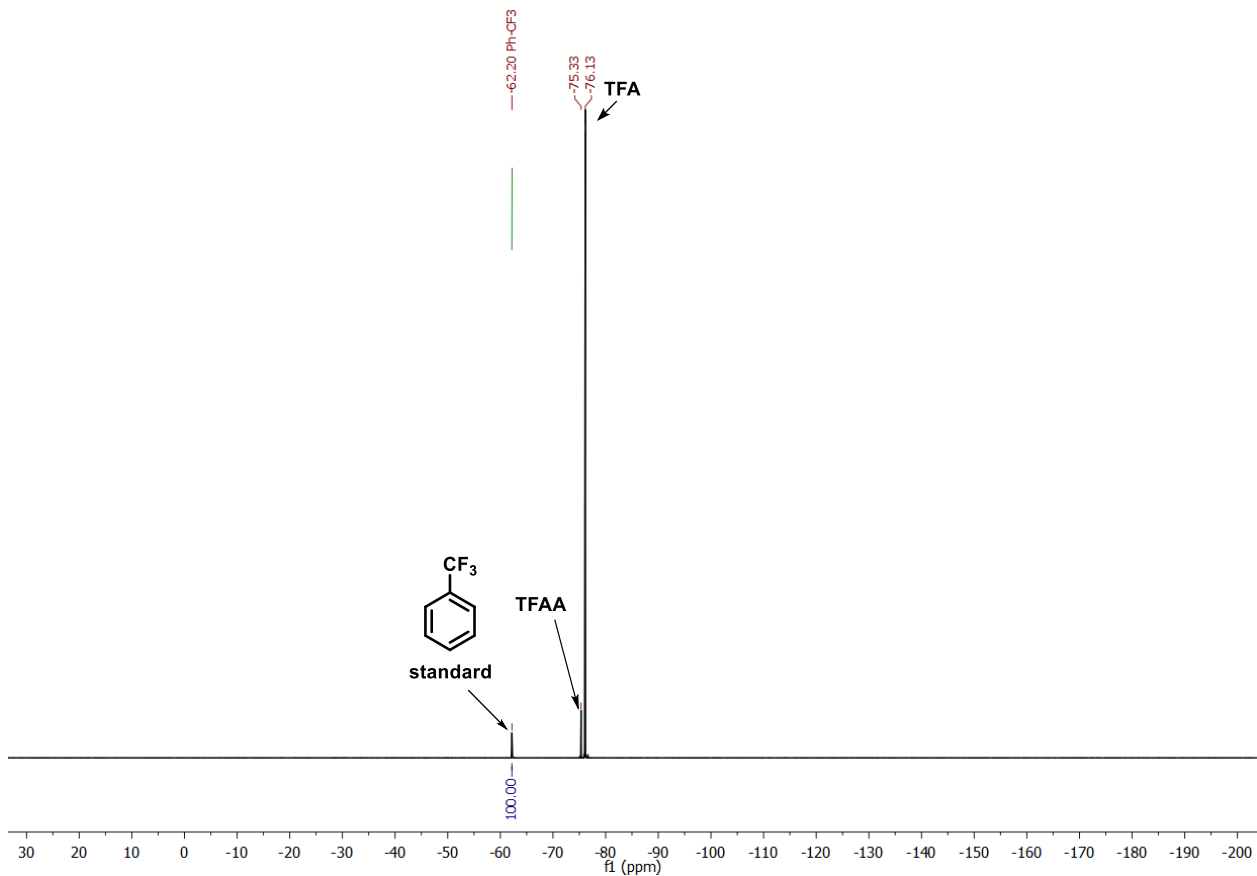

<sup>19</sup>F NMR spectrum of standard (benzotrifluoride) in DMSO-*d*<sub>6</sub>/EtOAc with TFAA

### 3. Optimization

Optimal conditions:

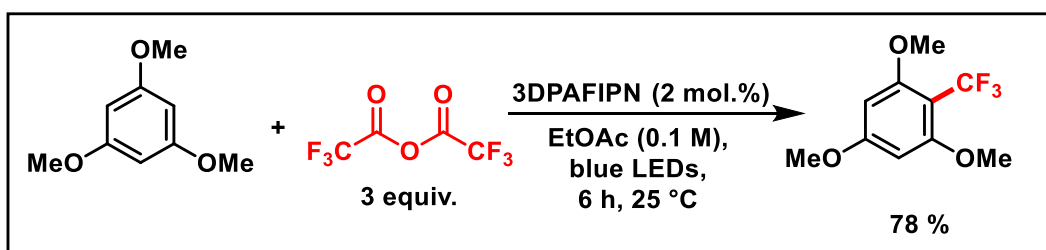

Scheme S1.

**Table S3.** Screening of organic photocatalysts and light source

| Entry | Light source | Photocatalyst                          | <sup>19</sup> F NMR yield, % |
|-------|--------------|----------------------------------------|------------------------------|
| 1     |              | -                                      | -                            |
| 2     |              | Eosin Y (1 mol.%)                      | -                            |
| 3     |              | Rhodamine 6G (1 mol.%)                 | -                            |
| 4     |              | Rhodamine B (1 mol.%)                  | -                            |
| 5     | White LEDs   | Birch O-PC™ C0103 (1 mol.%)            | -                            |
| 6     |              | Riboflavin (1 mol.%)                   | -                            |
| 7     |              | Methylene blue (1 mol.%)               | -                            |
| 8     |              | 4CzTPN (1 mol.%)                       | -                            |
| 9     |              | Tetrahydroxyphenyl porphyrin (1 mol.%) | -                            |
| 10    |              | 4CzIPN (1 mol.%)                       | 5                            |
| 11    | White LEDs   | 3DPAFIPN (1 mol.%)                     | 41                           |
| 12    | Violet LEDs  | 3DPAFIPN (1 mol.%)                     | 50                           |
| 13    | Blue LEDs    | 3DPAFIPN (1 mol.%)                     | 54                           |
| 14    | White LEDs   | 3DPAFIPN (2 mol.%)                     | 64                           |
| 15    | Violet LEDs  | 3DPAFIPN (2 mol.%)                     | 64                           |
| 16    | Blue LEDs    | 3DPAFIPN (2 mol.%)                     | 78                           |
| 17    | Blue LEDs    | 3DPAFIPN (5 mol.%)                     | 87                           |

Conditions: 1,3,5-trimethoxybenzene (0.3 mmol), 3 equiv of TFAA, EtOAc (0.1 M), 6 h, 25 °C

**Table S4.** Screening of solvents

| Entry    | Solvent           | <sup>19</sup> F NMR yield, % |
|----------|-------------------|------------------------------|
| 1        | CHCl <sub>3</sub> | -                            |
| 2        | DMF               | -                            |
| 3        | DMSO              | -                            |
| 4        | MeCN              | traces                       |
| 5        | Acetone           | 4                            |
| 6        | THF               | 6                            |
| 7        | MTBE              | 27                           |
| 8        | BuOAc             | 28                           |
| <b>9</b> | <b>EtOAc</b>      | <b>78</b>                    |

Conditions: 2 mol % 3DPAFIPN, 3 equiv of TFAA, C = 0.1 M, blue LEDs, 6 h, 25 °C

**Table S5.** Optimization of reaction time

| Entry    | Time       | <sup>19</sup> F NMR yield, % |
|----------|------------|------------------------------|
| 1        | 1 h        | 27                           |
| 2        | 2 h        | 46                           |
| 3        | 4 h        | 68                           |
| <b>4</b> | <b>6 h</b> | <b>78</b>                    |
| 5        | 12 h       | 57                           |

Conditions: 2 mol % 3DPAFIPN, 3 equiv of TFAA, EtOAc (0.1 M), blue LEDs, 25 °C

**Table S6.** Optimization of amount of TFAA

| Entry    | Equiv. of TFAA    | <sup>19</sup> F NMR yield, % |
|----------|-------------------|------------------------------|
| 1        | 1                 | 28                           |
| 2        | 2                 | 47                           |
| <b>3</b> | <b>3</b>          | <b>78</b>                    |
| 4        | 3 + 1 (after 2 h) | 72                           |
| 5        | 5                 | 74                           |
| 6        | 10                | 77                           |

Conditions: 2 mol % 3DPAFIPN, EtOAc (0.1 M), blue LEDs, 6 h, 25 °C

**Table S7.** Various controlled experiments

| Entry | Deviations from optimal conditions | Yield, % |
|-------|------------------------------------|----------|
| 1     | No PC                              | -        |
| 2     | No light                           | -        |
| 3     | On air                             | -        |
| 4     | C = 0.05 M                         | 15       |
| 5     | 50 °C                              | 68       |
| 6     | 3 equiv. TFA instead of TFAA       | -        |
| 7     | + 1 equiv. of TEMPO                | -        |
| 8     | + 1 equiv. of <i>para</i> -quinone | -        |
| 9     | + 1 equiv. of Et <sub>3</sub> N    | 2        |
| 10    | + 3 equiv. TFA                     | 72       |

Optimal conditions: 2 mol % 3DPAFIPN, 3 equiv TFAA, EtOAc (0.1 M), blue LEDs, 6 h, 25 °C

## 4. Radical trapping

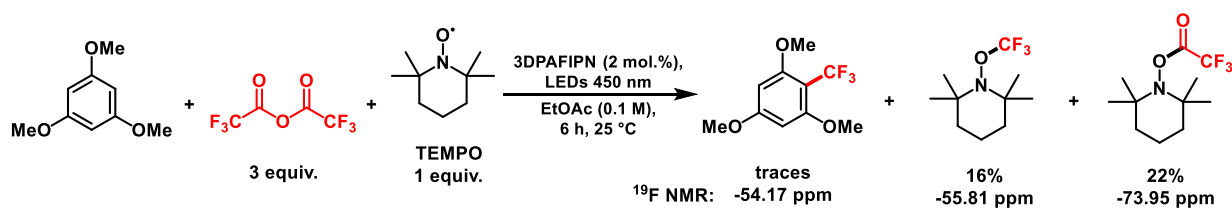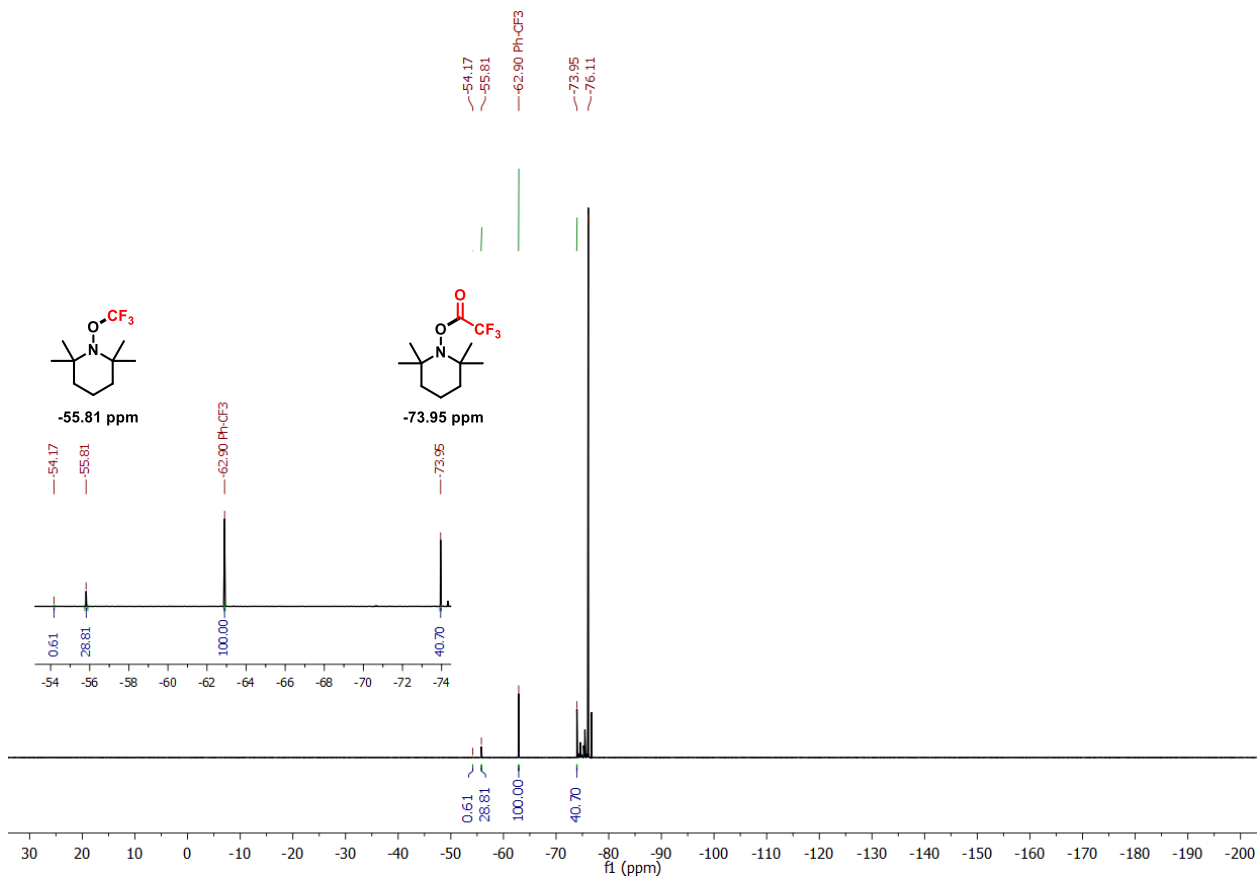

$^{19}\text{F NMR}$  spectra of radical trapping with TEMPO

The product **TEMPO- $\text{CF}_3$**  was further confirmed by GC-MS analysis. **GC-MS (EI):**  $m/z$  calcd for  $\text{C}_{10}\text{H}_{18}\text{F}_3\text{NO}$   $[\text{M}]^+$  225; found 225. The product peak was observed at 10.53 min.

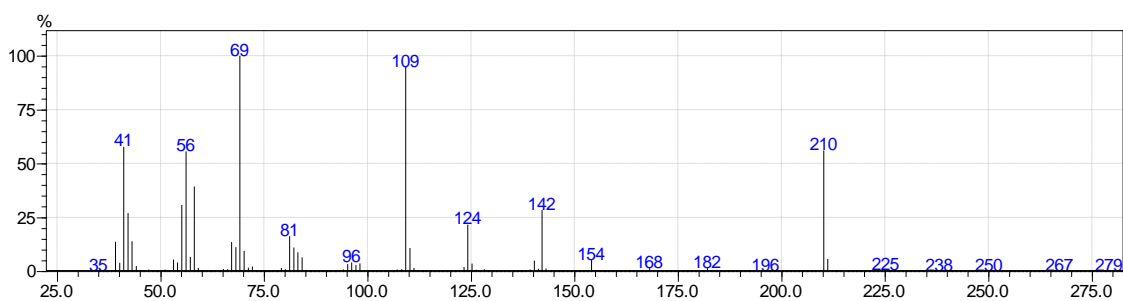

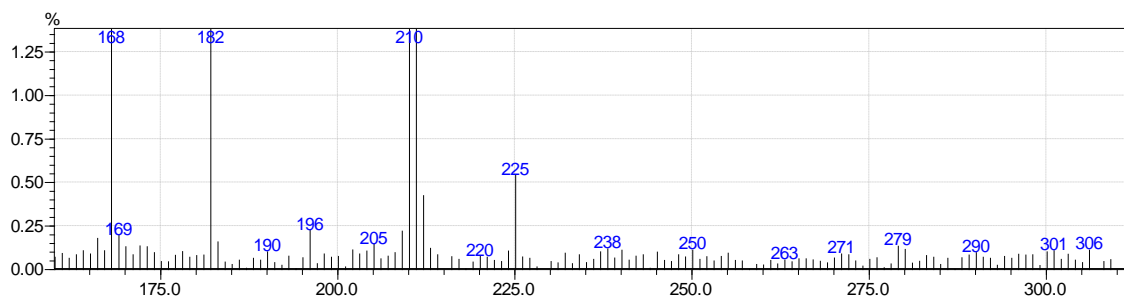

The product **TEMPO-C(O)CF<sub>3</sub>** was further confirmed by GC-MS analysis. **GC-MS (EI):** *m/z* calcd for C<sub>11</sub>H<sub>18</sub>F<sub>3</sub>NO<sub>2</sub> [M]<sup>+</sup> 253; found 253. The product peak was observed at 13.19 min.

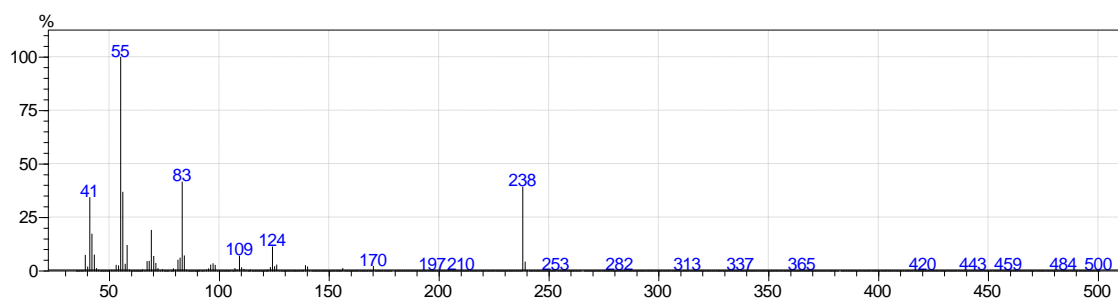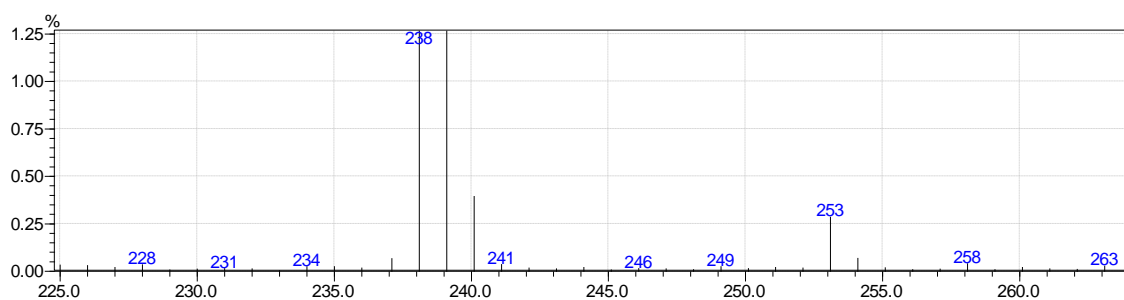

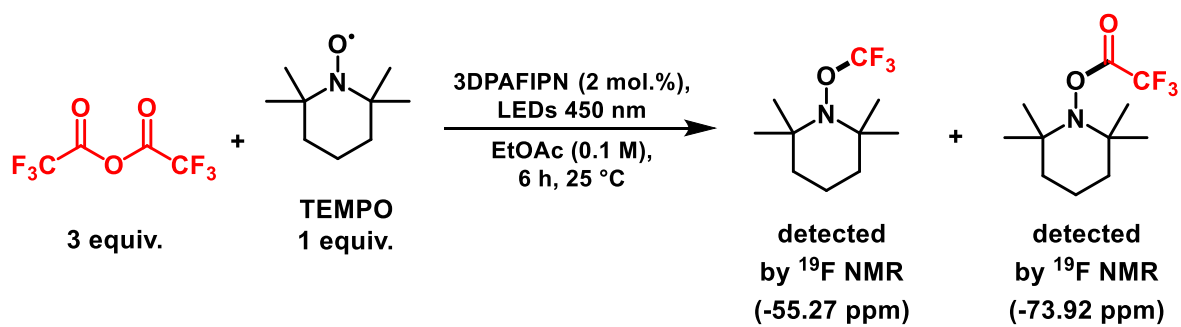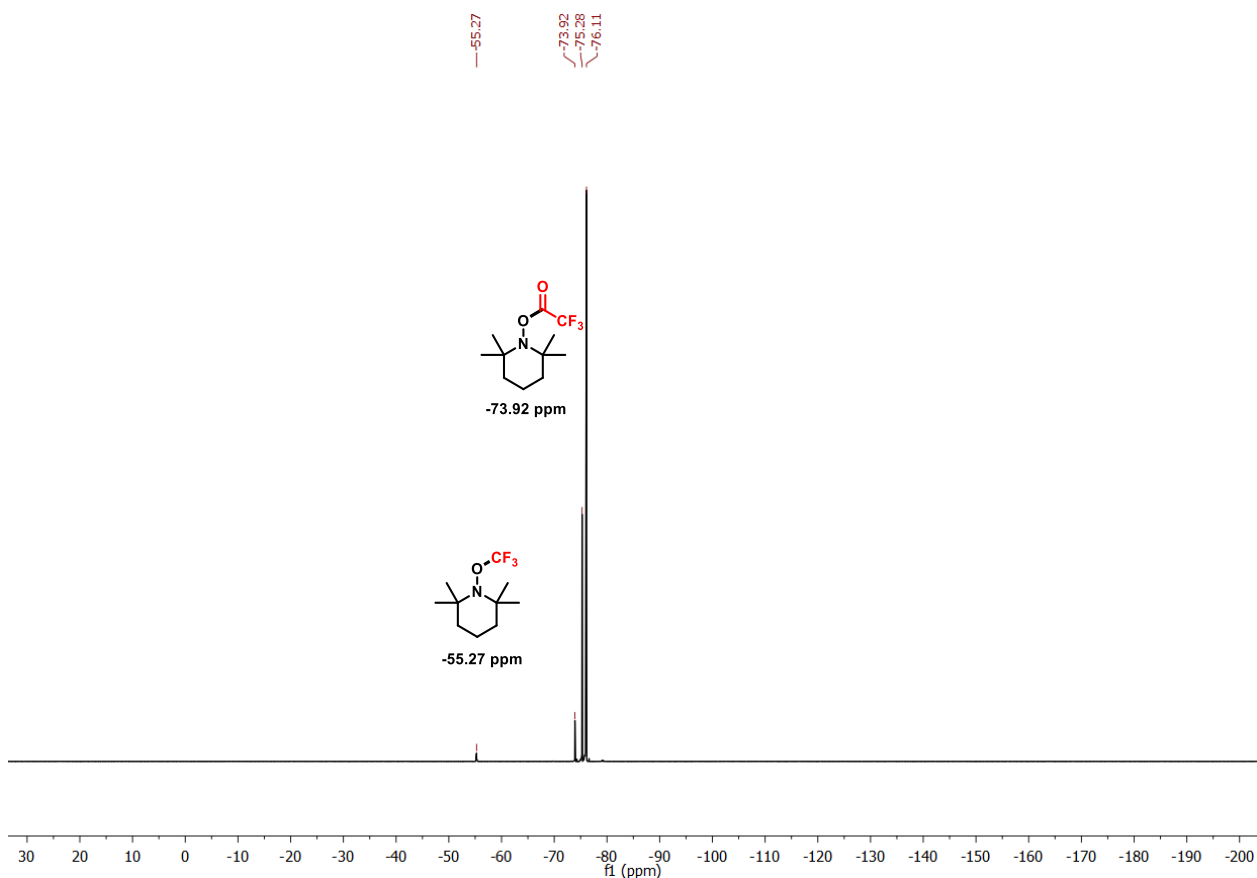

$^{19}\text{F}$  NMR spectra of radical trapping with TFAA and TEMPO

## 5. Scaling-up

For scaling-up the photochemical reaction, two methods were used: increasing the number of identical tubes or using a reaction vessel with a larger diameter and size according to the General procedure.

### 1) Trifluoromethylation of 403 mg of 1,3,5-trimethoxybenzene in 8 vials

Each of 8 Pyrex tube (7.5 mL, No. 99447, i.d. = 11 mm) equipped with a magnetic stirring bar were charged with 3DPAFIPN (0.02 equiv, 0.006 mmol, 3.9 mg) and 1,3,5-trimethoxybenzene (50.4 mg, 1 equiv, 0.3 mmol). Then the atmosphere inside the vials were changed into argon. Dry ethyl acetate (3 mL) was added using syringe under argon atmosphere via PTFE/silicone septa and then TFAA (3 equiv, 0.9 mmol, 125  $\mu$ L) was added. A stream of argon was bubbled through the reaction mixture for 1 minute in an ultrasonic bath. Eight reaction vials were placed in the photoreactor zone (blue LEDs,  $\lambda = 450$  nm) and irradiated for 6 h. After the reaction, the mixture was combined, and 160  $\mu$ L (190.4 mg, 1.304 mmol) of benzotrifluoride ( $C_6H_5CF_3$ ) was added as standard and the mixture stirred for 1 minute. For quantitative  $^{19}F$  NMR 0.3 mL of the resulting solution was transferred to NMR tube and diluted with 0.3 mL of deuterated solvent (DMSO- $d_6$  or  $CDCl_3$ ).  $^{19}F$  NMR yield was 67%.

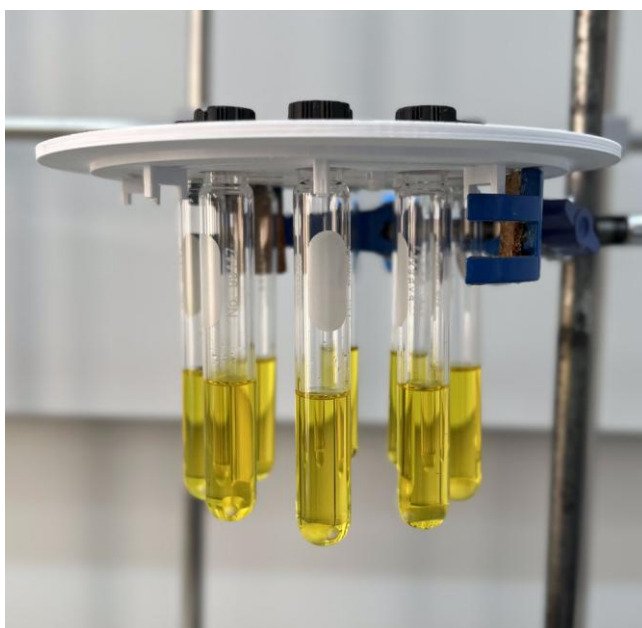

**Figure S9.** The reaction mixture in 8 pcs of 7.5 mL Pyrex tube (i.d. = 11 mm)

### 2) Trifluoromethylation of 403 mg of 1,3,5-trimethoxybenzene in Schlenk flask

A 50 mL Schlenk flask (borosilicate, i.d. = 30 mm) equipped with a magnetic stirring bar was charged with 3DPAFIPN (0.02 equiv, 0.048 mmol, 31.1 mg) and 1,3,5-trimethoxybenzene (403 mg, 1 equiv, 2.4 mmol). Then the atmosphere inside the vials were changed into argon via

vacuum pump and argon balloon. Dry ethyl acetate (24 mL) was added using syringe under argon atmosphere via rubber septa and then TFAA (3 equiv, 7.2 mmol, 1.0 mL) was added. A stream of argon was bubbled through the reaction mixture for 1 minute in an ultrasonic bath. Then the flask was placed in the photoreactor zone (blue LEDs,  $\lambda = 450$  nm) and irradiated for 6 h. After the reaction, 160  $\mu$ L (190.4 mg, 1.304 mmol) of benzotrifluoride ( $C_6H_5CF_3$ ) as standard was added and the mixture stirred for 1 minute. For quantitative  $^{19}F$  NMR 0.3 mL of the resulting solution was transferred to NMR tube and diluted with 0.3 mL of deuterated solvent ( $DMSO-d_6$  or  $CDCl_3$ ).  $^{19}F$  NMR yield was 51%.

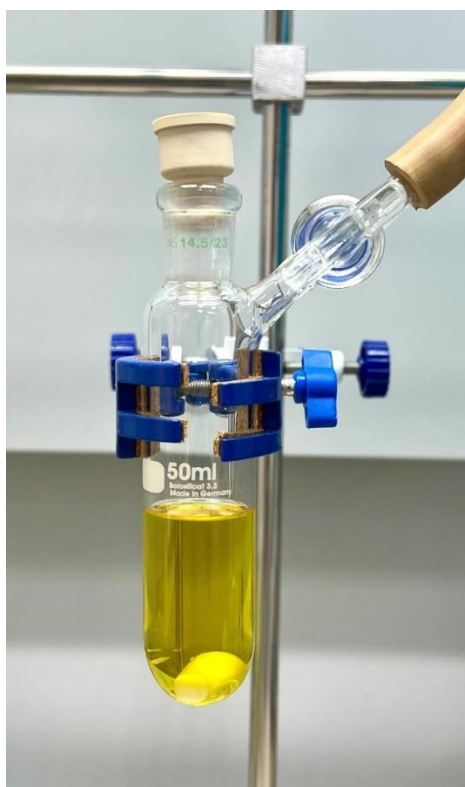

**Figure S10.** The reaction mixture (24 mL) in a 50 mL flask (i.d. = 30 mm)

The reaction of 1,3,5-trimethoxybenzene (403 mg, 2.4 mmol, 1 equiv) afforded product **1** in 51% yield ( $^{19}F$  NMR). Purification by silica gel column chromatography (cyclohexane/EtOAc, 100/0 to 95/5) gave product **1** (220 mg, 39%).

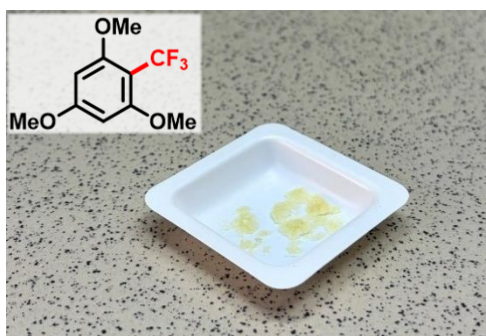

**Figure S11.** Crystals of 1,3,5-trimethoxy-2-(trifluoromethyl)benzene (**1**)

$^1\text{H}$  NMR (400 MHz,  $\text{CDCl}_3$ ) of 1,3,5-trimethoxy-2-(trifluoromethyl)benzene (**1**)

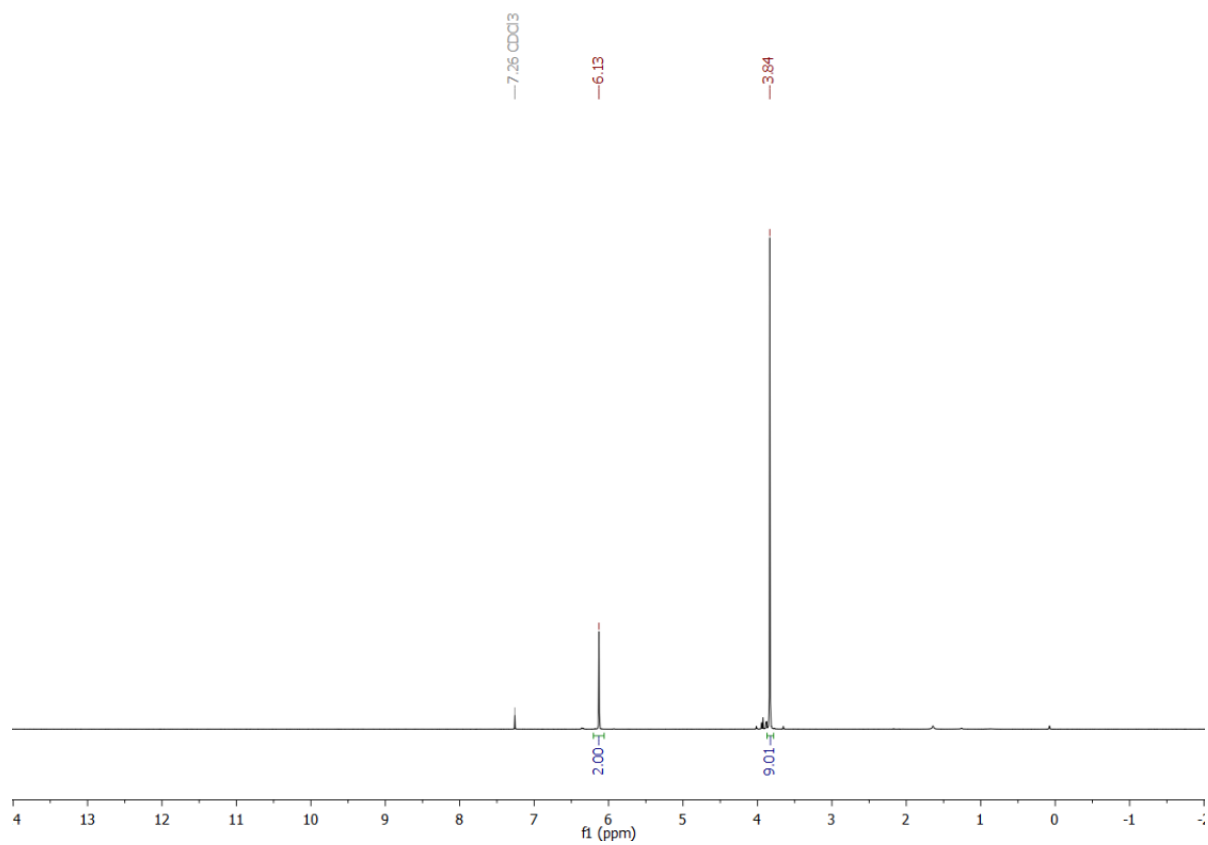

$^{19}\text{F}$  NMR (376 MHz,  $\text{CDCl}_3$ ) of 1,3,5-trimethoxy-2-(trifluoromethyl)benzene (**1**)

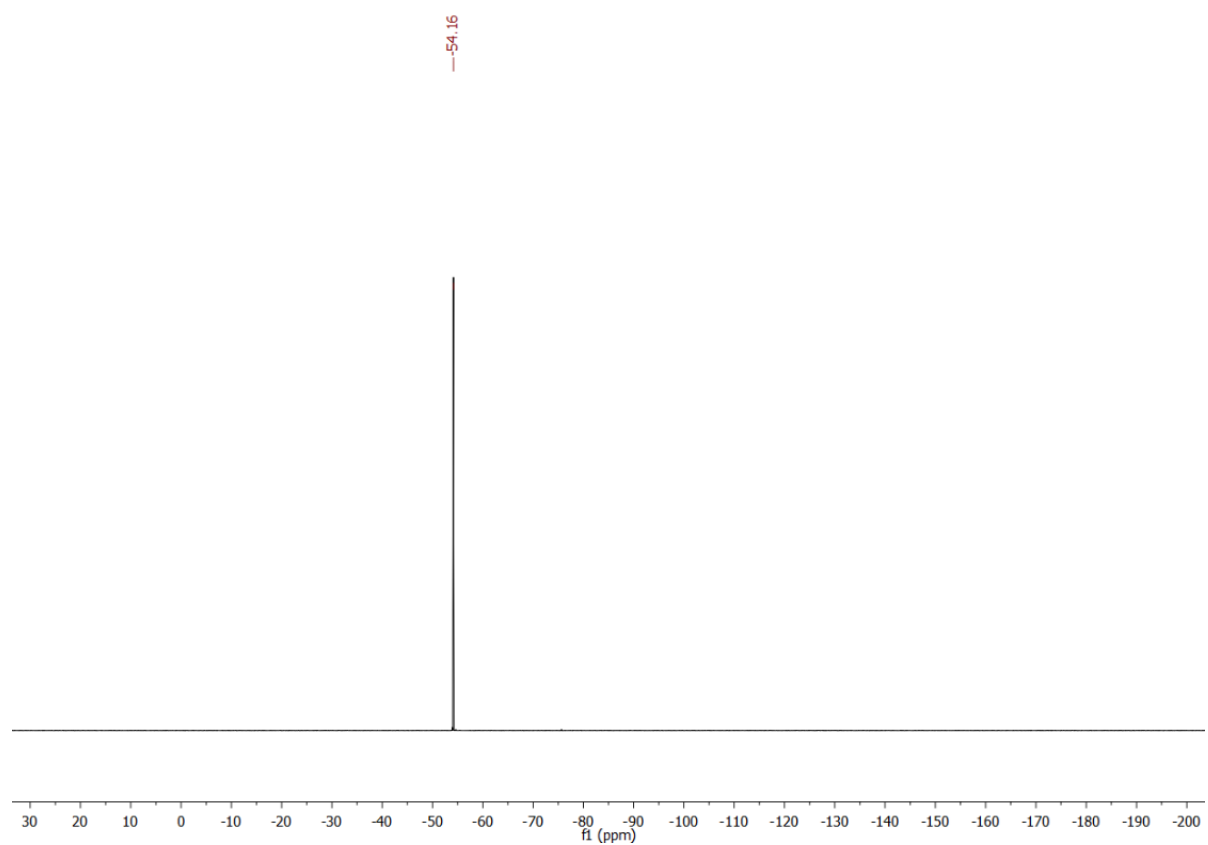

**Table S8.** Trifluoromethylation of 403 mg of 1,3,5-trimethoxybenzene

| Vessels       | <sup>19</sup> F NMR yield, % |
|---------------|------------------------------|
| 8 vials       | 67                           |
| Schlenk flask | 51                           |

Conditions: 403 mg (2.4 mmol) of 1,3,5-trimethoxybenzene, EtOAc (0.1 M), 2 mol % 3DPAFIPN, blue LEDs, 6 h, 25 °C

3) *Trifluoromethylation of 1000 mg of 1,3,5-trimethoxybenzene in Schlenk flask*

A 100 mL Schlenk flask (borosilicate, i.d. = 38 mm) equipped with a magnetic stirring bar were charged with 3DPAFIPN (0.02 equiv, 0.12 mmol, 77.8 mg) and 1,3,5-trimethoxybenzene (1000 mg, 1 equiv, 6.0 mmol). Then the atmosphere inside the vials was changed into argon via vacuum pump and argon balloon. Dry ethyl acetate (60 mL) was added using syringe under argon atmosphere via rubber septa and then TFAA (3 equiv, 18.0 mmol, 2.5 mL) was added. A stream of argon was bubbled through the reaction mixture for 1 minute in an ultrasonic bath. Then the flask was placed in the photoreactor zone (blue LEDs,  $\lambda = 450$  nm) and irradiated for 6 h. After the reaction, 400  $\mu$ L (476 mg, 3.26 mmol) of benzotrifluoride ( $C_6H_5CF_3$ ) was added as standard and the mixture stirred for 1 minute. For quantitative <sup>19</sup>F NMR 0.3 mL of the resulting solution was transferred to NMR tube and diluted with 0.3 mL of deuterated solvent (DMSO-*d*<sub>6</sub> or CDCl<sub>3</sub>). <sup>19</sup>F NMR yield was 51%.

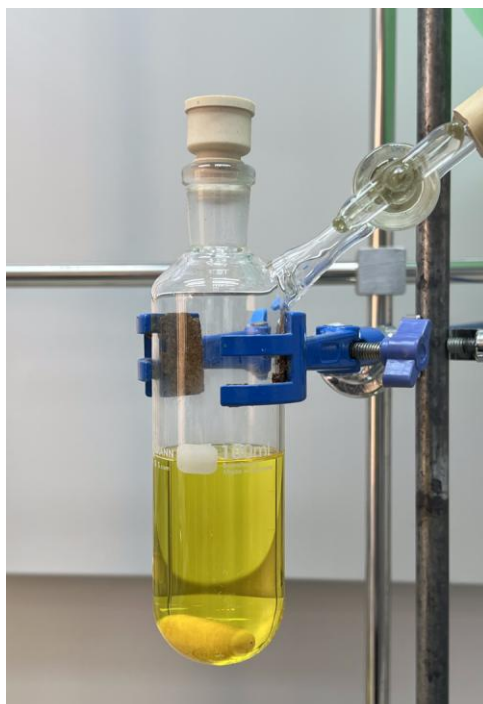

**Figure S12.** The reaction mixture (60 mL) in a 100 mL flask (i.d. = 38 mm)

**Table S9.** Trifluoromethylation of 1,3,5-trimethoxybenzene in flask

| Scale                                        | <sup>19</sup> F NMR yield, % |
|----------------------------------------------|------------------------------|
| Schlenk flask (403 mg, 24 mL, I.D. = 30 mm)  | 51                           |
| Schlenk flask (1000 mg, 60 mL, I.D. = 38 mm) | 51                           |

Conditions: EtOAc (0.1 M), 2 mol.% 3DPAFIPN, blue LEDs, 6 h, 25 °C

4) *Trifluoromethylation of 50.4 mg of 1,3,5-trimethoxybenzene in flow (i.d. = 0.75 mm) with 3 mol % of 3DPAFIPN*

A 10 mL Schlenk flask equipped with a magnetic stirring bar was charged with 3DPAFIPN (0.03 equiv, 0.009 mmol, 5.9 mg) and 1,3,5-trimethoxybenzene (50.4 mg, 1 equiv, 0.3 mmol). Then the atmosphere inside the vial was changed into argon via vacuum pump and argon balloon. Dry ethyl acetate (3 mL) was added using syringe under argon atmosphere via rubber septa and then TFAA (3 equiv, 0.9 mmol, 125  $\mu$ L) was added. A stream of argon was bubbled through the reaction mixture for 1 minute in an ultrasonic bath. Then the solution was loaded into a 5 mL plastic syringe (B.Braun). The syringe was then fitted to a syringe pump and connected to a 3 mL FEP microreactor coil (internal diameter of 750  $\mu$ m, Figure S4) via a Luer adapter, previously flushed with dry ethyl acetate. The flow rate (mL/min) was set to obtain a residence time of 30 minutes. After the photoirradiation zone, the reaction mixture was collected in a flask. When the syringe was fully empty, again dry ethyl acetate was loaded into a syringe and injected to collect all in a round-bottomed flask. Then 20  $\mu$ L (23.8 mg, 0.163 mmol) of benzotrifluoride (C<sub>6</sub>H<sub>5</sub>CF<sub>3</sub>) as standard was added as standard to the mixture and the mixture stirred for 1 minute. For quantitative <sup>19</sup>F NMR 0.3 mL of the resulting solution was transferred to NMR tube and diluted with 0.3 mL of deuterated solvent (DMSO-*d*<sub>6</sub> or CDCl<sub>3</sub>). <sup>19</sup>F NMR yield was 71 %.

### Green metrics

The adopted green metrics have been calculated employing the following equations [1-4]:

$$\text{STY (Space Time Yield)} = \frac{\text{mass of product}}{\text{reactor volume} \times \text{reaction time}}$$

$$\text{Productivity} = \frac{\text{mass of product}}{\text{reaction time}}$$

| Entry | Amount of TMB                                  | Reaction vessel                                          | Time  | <sup>19</sup> F NMR yield, % | Productivity, mg/h | STY, g L <sup>-1</sup> h <sup>-1</sup> |
|-------|------------------------------------------------|----------------------------------------------------------|-------|------------------------------|--------------------|----------------------------------------|
| 1     | 8 vials × 0.3 mmol (2.4 mmol, 403 mg)          | 8 vials (i.d. = 11 mm)                                   | 6 h   | 67                           | 63                 | 1.05                                   |
| 2     | 2.4 mmol (403 mg)                              | Schlenk flask (i.d. = 30mm)                              | 6 h   | 51                           | 48                 | 0.96                                   |
| 3     | 6.0 mmol (1000 mg)                             | Schlenk flask (i.d. = 38 mm)                             | 6 h   | 51                           | 120                | 1.20                                   |
| 4     | 50.4 mg (TMB is contained in 1 reactor volume) | Flow setup, <u>3 mol % PC</u> (i.d. = 0.75 mm, V = 3 mL) | 0.5 h | 71                           | 101                | 33.51                                  |

## 6. Photophysical investigations

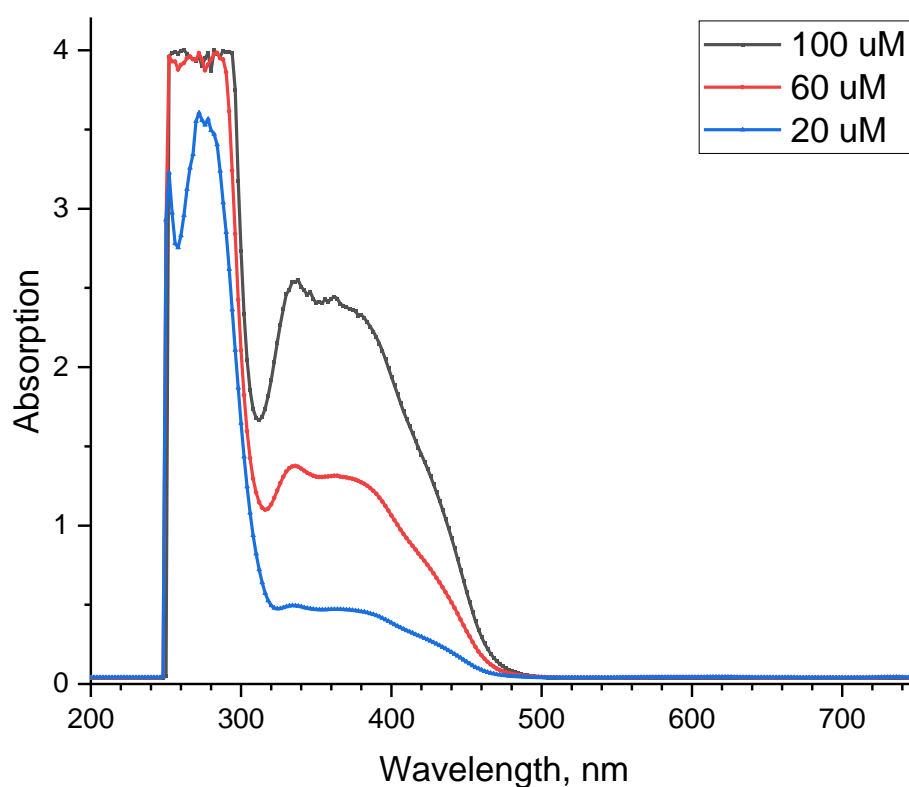

**Figure S13.** Absorption spectra of 3DPAFIPN at various concentrations in EtOAc

## 7. Stern–Volmer quenching studies

The quenching efficiency can be defined as Stern–Volmer relationship:

$$\frac{I_0}{I} - 1 = k_q \tau_0 \cdot [\text{quencher}]$$

Where  $I_0$  being the luminescence intensity in the absence of any quencher,  $I$  is the luminescence intensity in the presence of a predefined quencher concentration while  $\tau_0$  being

the excited state lifetime of the photocatalyst which has been previously reported as  $\tau_0 = 4.2$  ns for 3DPAFIPN [5].

*Preparation of stock solutions for Stern–Volmer measurements:*

**3DPAFIPN:** a stock solution of photocatalyst (0.02 mM) was prepared by dissolving 0.156 mg (0.24  $\mu$ mol) in 12 mL EtOAc in Schlenk flask under argon atmosphere.

**Trifluoroacetic anhydride (TFAA):** a stock solution of TFAA (40 mM) was prepared by dissolving 66.8  $\mu$ L (100.8 mg, 0.48 mmol) in 12 mL EtOAc in Schlenk flask under argon atmosphere.

**1,3,5-Trimethoxybenzene (TMB):** A stock solution of TMB (40 mM) was prepared by dissolving 80.8 mg (0.48 mmol) in 12 mL EtOAc in Schlenk flask under argon atmosphere.

Quartz cuvettes (3.5 mL, 10 mm path length, silica cap) were filled with the photocatalyst stock solution (3 mL), the relevant amount of the reagent stock solution (or pure reagent) and EtOAc to obtain a total volume of 3.5 mL. All the prepared solutions were degassed for 5 minutes with a stream of argon. The solution was excited at a wavelength of 450 nm and the emission spectra was recorded from 456 to 700 nm.

- 1) **TFAA.** First the influence on the emission spectrum of the catalyst by TFAA was investigated.

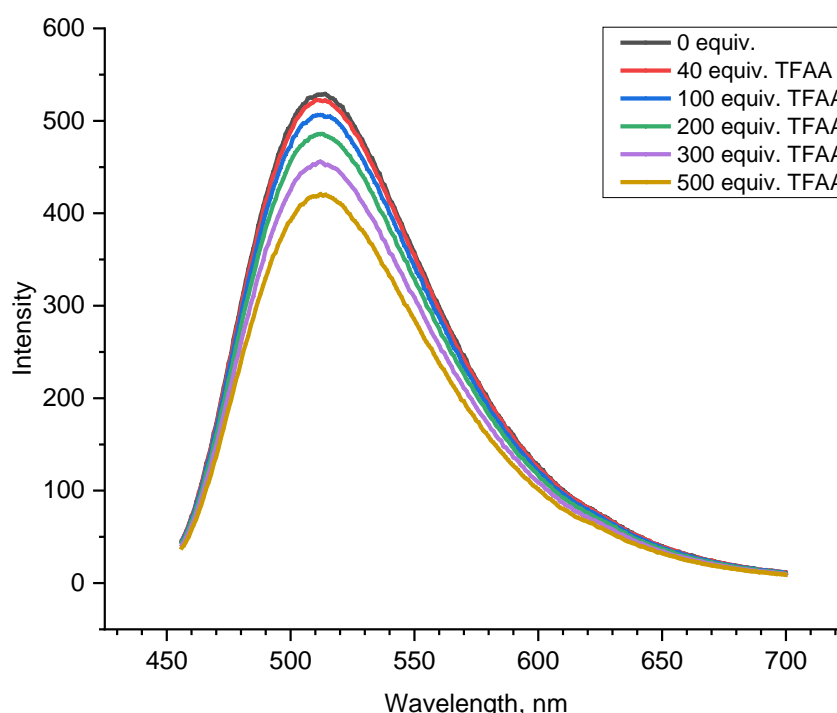

**Figure S14.** Emission quenching of 3DPAFIPN with TFAA (EtOAc, 0.02 mM 3DPAFIPN, excitation wavelength = 450 nm,  $\lambda_{em} = 456$ -700 nm,  $\lambda_{max.em} = 512$  nm)

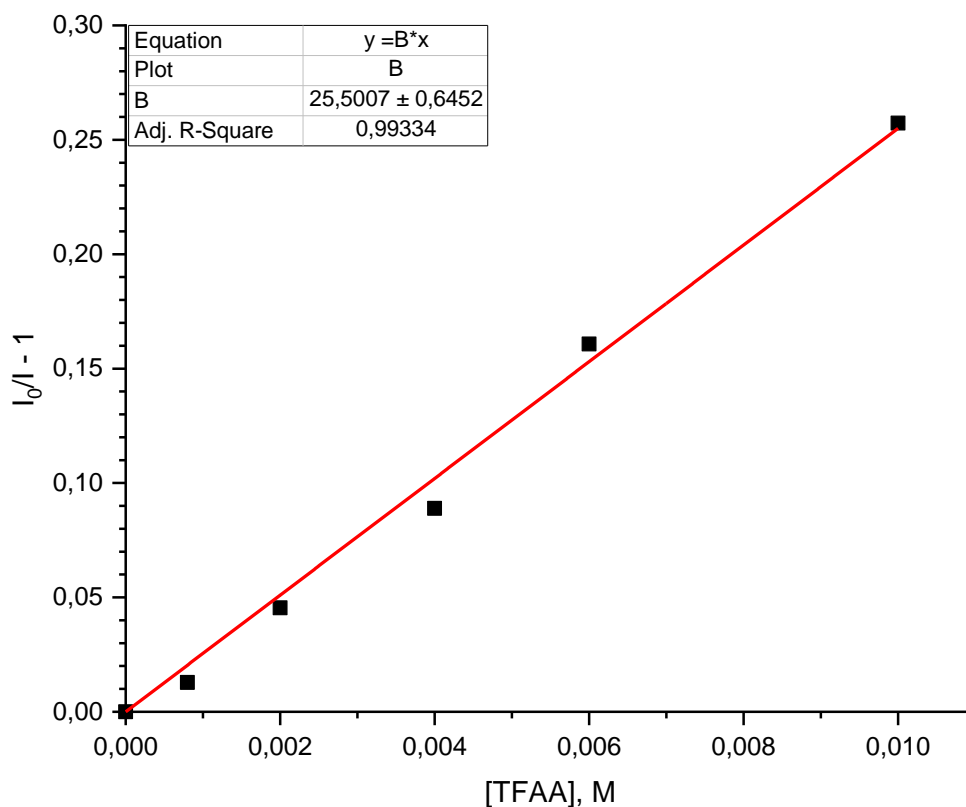

**Figure S15.** Stern–Volmer plot of the above data ( $y = 25.5007 \cdot x$ ). The quenching constant  $K_q = 6.07 \cdot 10^9 \text{ M}^{-1} \cdot \text{s}^{-1}$  was determined using the Stern–Volmer equation and a lifetime of as  $\tau_0 = 4.2 \text{ ns}$  for 3DPAFIPN

2) *1,3,5-Trimethoxybenzene (TMB)*. First the influence on the emission spectrum of the catalyst by TFAA was investigated.

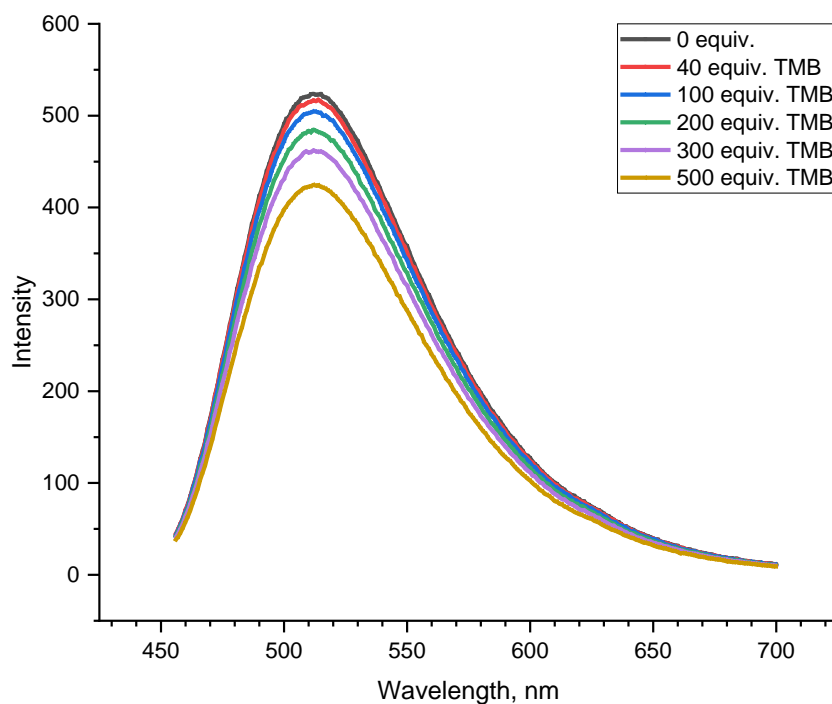

**Figure S16.** Emission quenching of 3DPAFIPN with 1,3,5-trimethoxybenzene (EtOAc, 0.02 mM 3DPAFIPN, excitation wavelength = 450 nm,  $\lambda_{\text{em}} = 456\text{-}700 \text{ nm}$ ,  $\lambda_{\text{max.em}} = 512 \text{ nm}$ )

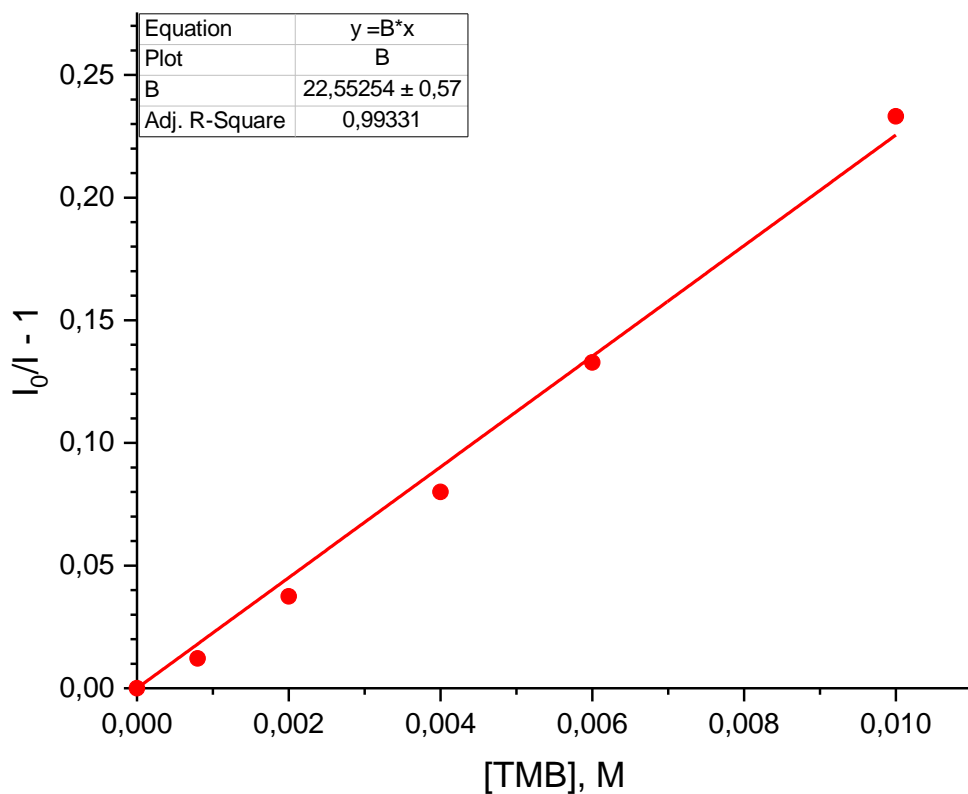

**Figure S17.** Stern–Volmer plot of the above data ( $y = 22.55254 \cdot x$ ). The quenching constant  $K_q = 5.37 \cdot 10^9 \text{ M}^{-1} \cdot \text{s}^{-1}$  was determined using the Stern–Volmer equation and a lifetime of as  $\tau_0 = 4.2 \text{ ns}$  for 3DPAFIPN

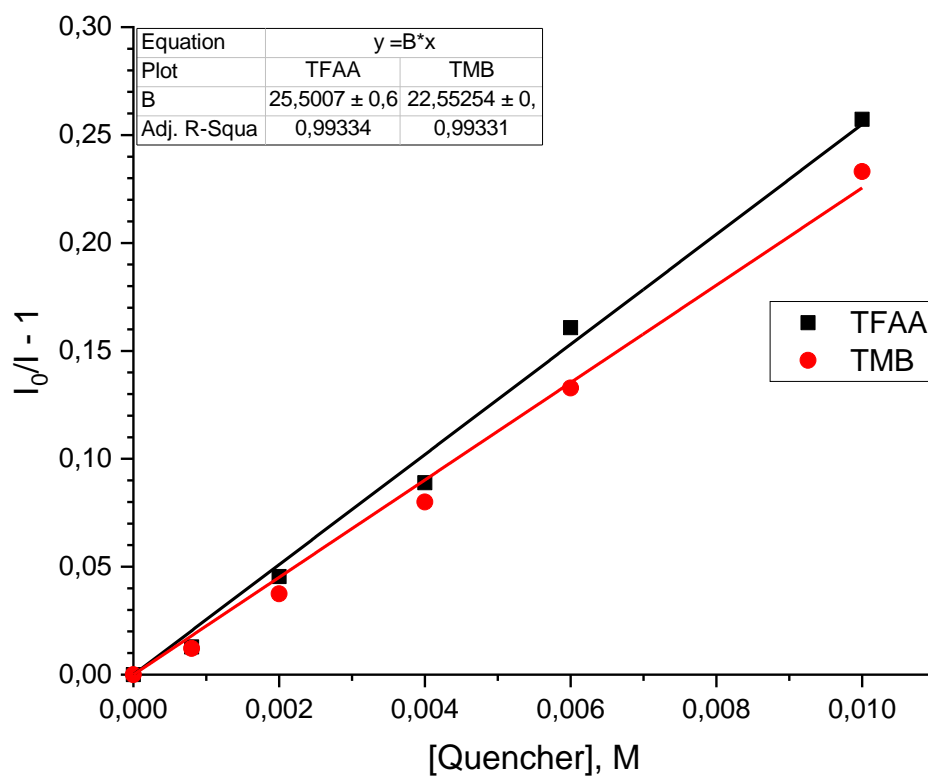

**Figure S18.** Stern–Volmer plots of both TFAA and TMB

## 8. Synthesis of starting materials

### General procedure for methylation of phenols

In a round-bottomed flask the corresponding phenol (5 mmol, 1 equiv) was dissolved in acetone (50 mL). Then potassium carbonate (3.1 g, 22.5 mmol, 4.5 equiv) and dimethylsulfate (1.42 mL, 1.89 g, 15.0 mmol, 3.0 equiv) were added (\* for one –OH group). The reaction mixture was refluxed for 18 h, progress of reaction was monitored by TLC. The mixture was quenched with ammonia (15% aq., 50 mL). The aqueous layer was extracted with ethyl acetate (3 × 50 mL). The organic layer was washed with brine (50 mL) and dried over sodium sulfate. The crude product was purified by silica gel column chromatography using EtOAc/CyH.

For known compounds, the spectra completely matched that reported in the literature [6–11].

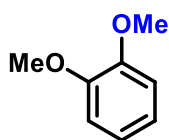

A1, 71 %  
[6]

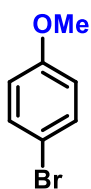

A2, 77 %  
[7]

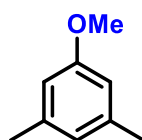

A3, 78 %  
[8]

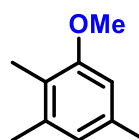

A4, 90 %  
[9]

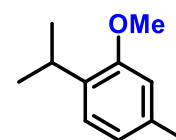

A5, 73 %  
[10]

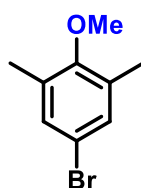

A6, 93 %  
[7]

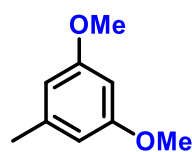

A8, 87 %  
[11]

## 9. Scope and characterization of products

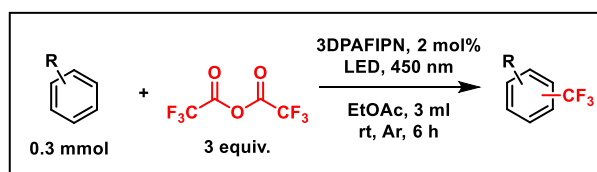

### Alkyarenes ( $\sigma$ -donors)

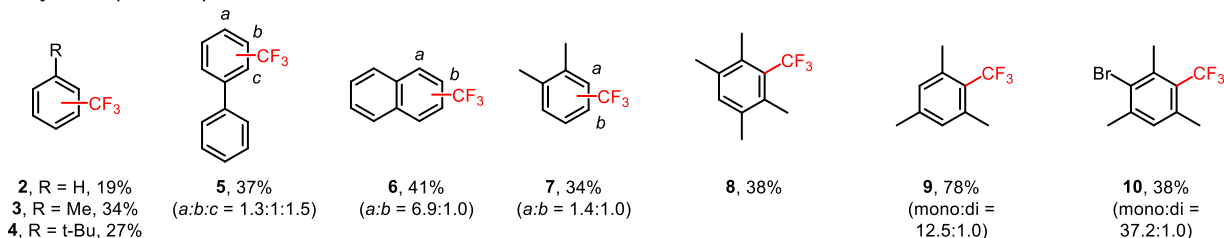

### Anisoles ( $\pi$ -donors)

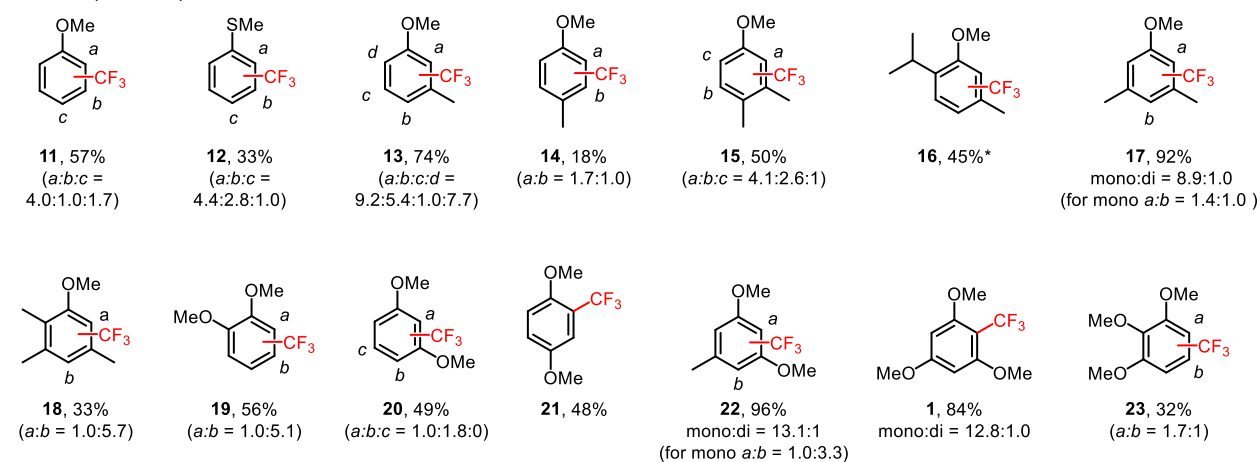

### Carbonyl derivatives ( $\pi$ -acceptors)

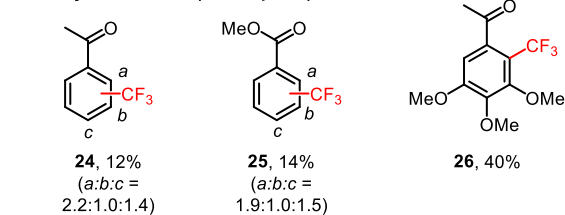

### Heterocycles

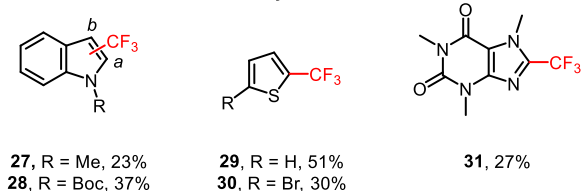

Scheme S2.

### Haloarenes ( $\sigma$ -acceptors)

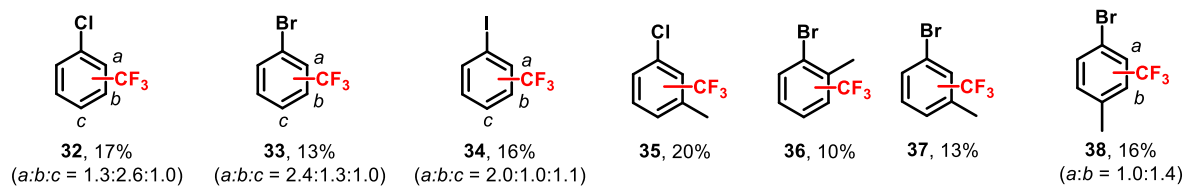

### Brominated anisoles and methylanisoles

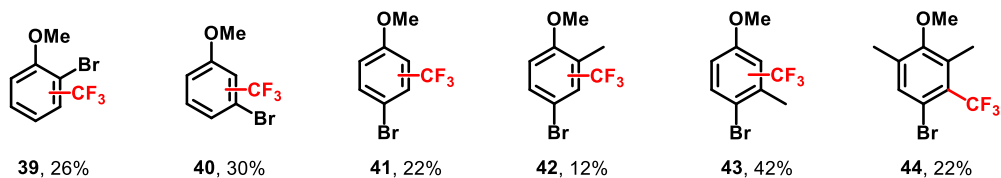

Scheme S3. Reaction with halobenzenes and halotoluenes

### Unreactive substrates:

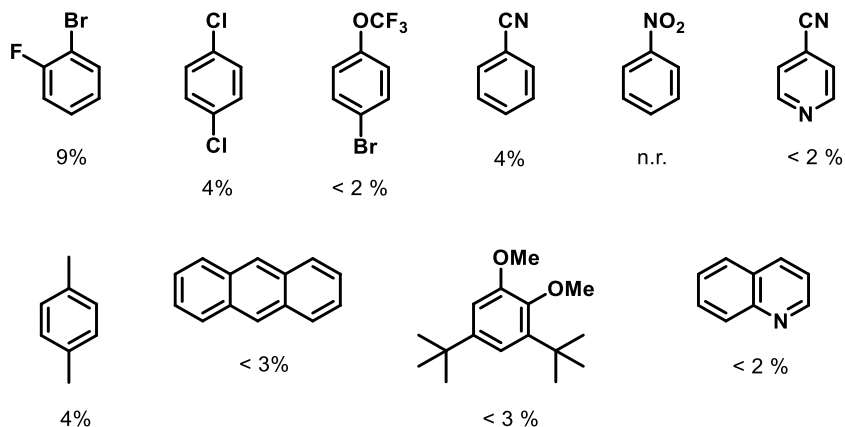

Scheme S4.

### Don't react via the direct trifluoromethylation pathway (reactions proceed differently):

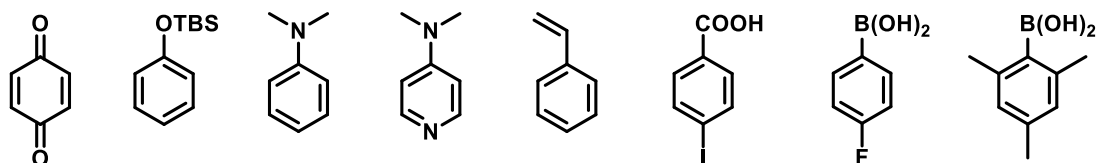

Scheme S5.

### Contain a reactive fragment O–H, N–H which give esters and amides:

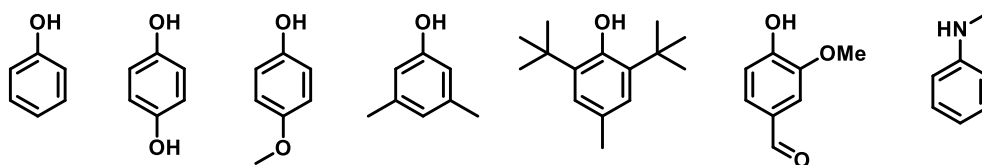

Scheme S6.

### (1) Trifluoromethylation of 1,3,5-trimethoxybenzene

The reaction was carried out using 1,3,5-trimethoxybenzene (50.4 mg, 0.3 mmol) according to the General procedure.

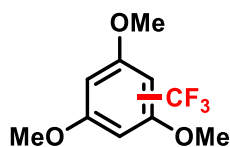

<sup>19</sup>F NMR yield: 84%

(mono-CF<sub>3</sub>:di-CF<sub>3</sub> = 12.8:1.0)

#### (1) 1,3,5-Trimethoxy-2-(trifluoromethyl)benzene

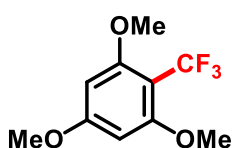

<sup>19</sup>F NMR (376 MHz, CDCl<sub>3</sub>/EtOAc):  $\delta = -54.17$  (s, 3F).

The data matched that of reported in the literature:  $\delta = -54.14$  (CDCl<sub>3</sub>) [12].

#### (1a) 1,3,5-Trimethoxy-2,4-bis(trifluoromethyl)benzene

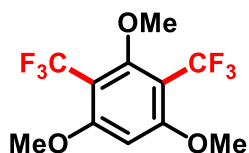

<sup>19</sup>F NMR (376 MHz, CDCl<sub>3</sub>/EtOAc):  $\delta -55.51$  (s, 6F).

The data matched that of reported in the literature:  $\delta = -55.49$  (CDCl<sub>3</sub>) [12].

### (2) Trifluoromethylation of benzene

The reaction was carried out using benzene (23.4 mg, 0.3 mmol) and 1-bromo-3-(trifluoromethyl)benzene (BrC<sub>6</sub>H<sub>4</sub>CF<sub>3</sub>) as standard (20  $\mu$ L, 32.4 mg, 0.144 mmol) according to the modified General procedure.

#### (2) (Trifluoromethyl)benzene (benzotrifluoride)

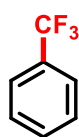

<sup>19</sup>F NMR yield: 19 %

<sup>19</sup>F NMR (376 MHz, DMSO-*d*<sub>6</sub>/EtOAc):  $\delta -62.20$  (s, 3F).

The data matched that of reported in the literature:  $\delta = -62.91$  (CDCl<sub>3</sub>) [13].

### (3) Trifluoromethylation of toluene

The reaction was carried out using methylbenzene (27.6 mg, 0.3 mmol) according to the General procedure.

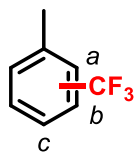

2 mol % 3DPAFIPN – <sup>19</sup>F NMR yield: 34%

(*a*:*b*:*c* = 3.1:1.3:1.0)

#### (3a) 1-Methyl-2-(trifluoromethyl)benzene

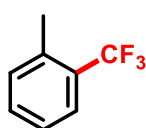

<sup>19</sup>F NMR (376 MHz, DMSO-*d*<sub>6</sub>/EtOAc): δ -61.22 (s, 3F).

The data matched that of reported in the literature: δ = -61.7 (CDCl<sub>3</sub>) [14].

#### (3b) 1-Methyl-3-(trifluoromethyl)benzene

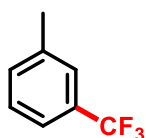

<sup>19</sup>F NMR (376 MHz, DMSO-*d*<sub>6</sub>/EtOAc): δ -62.12 (s, 3F).

The data matched that of reported in the literature: δ = -62.67 (CDCl<sub>3</sub>) [14].

#### (3c) 1-Methyl-4-(trifluoromethyl)benzene

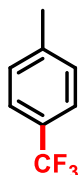

<sup>19</sup>F NMR (376 MHz, DMSO-*d*<sub>6</sub>/EtOAc): δ -61.77 (s, 3F).

The data matched that of reported in the literature: δ = -62.27 (CDCl<sub>3</sub>) [14].

### (4) Trifluoromethylation of *tert*-butylbenzene

The reaction was carried out using *tert*-butylbenzene (40.2 mg, 0.3 mmol) according to the General procedure.

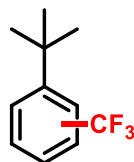

<sup>19</sup>F NMR yield of mixture of isomers: 27%

### (5) Trifluoromethylation of biphenyl

The reaction was carried out using biphenyl (46.2 mg, 0.3 mmol) according to the General procedure.

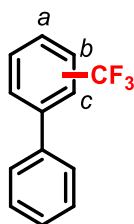

<sup>19</sup>F NMR yield: 37%

(*a*:*b*:*c* = 1.3:1.0:1.5)

#### (5a) 4-(Trifluoromethyl)-1,1'-biphenyl

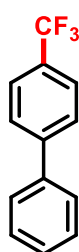

<sup>19</sup>F NMR (376 MHz, DMSO-*d*<sub>6</sub>/EtOAc): δ -61.92 (s, 3F).

The data matched that of reported in the literature: δ = -62.4 (CDCl<sub>3</sub>) [15].

#### (5b) 3-(Trifluoromethyl)-1,1'-biphenyl

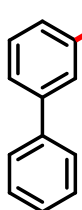

<sup>19</sup>F NMR (376 MHz, DMSO-*d*<sub>6</sub>/EtOAc): δ -62.08 (s, 3F).

The data matched that of reported in the literature: δ = -62.6 (CDCl<sub>3</sub>) [16].

#### (5c) 2-(Trifluoromethyl)-1,1'-biphenyl

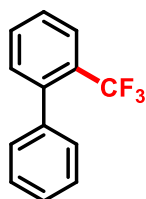

<sup>19</sup>F NMR (376 MHz, DMSO-*d*<sub>6</sub>/EtOAc): δ = -56.26 (s, 3F).

The data matched that of reported in the literature: δ = -56.8 (CDCl<sub>3</sub>) [15].

## (6) Trifluoromethylation of naphthalene

The reaction was carried out using naphthalene (38.4 mg, 0.3 mmol) according to the General procedure.

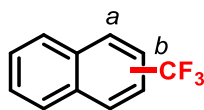

<sup>19</sup>F NMR yield: 41%

(*a*:*b* = 6.8:1.0)

### (6a) 1-(Trifluoromethyl)naphthalene

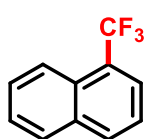

<sup>19</sup>F NMR (376 MHz, DMSO-*d*<sub>6</sub>/EtOAc)  $\delta = -59.39$  (d, *J* = 1.7 Hz, 3F).

The data matched that of reported in the literature:  $\delta = -59.7$  (CDCl<sub>3</sub>) [16,17].

### (6b) 2-(Trifluoromethyl)naphthalene

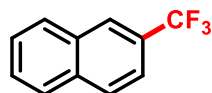

<sup>19</sup>F NMR (376 MHz, DMSO-*d*<sub>6</sub>/EtOAc)  $\delta = -61.70$  (s, 3F).

The data matched that of reported in the literature:  $\delta = -62.8$  (CDCl<sub>3</sub>) [18].

## (7) Trifluoromethylation of 1,2-dimethylbenzene (*o*-xylene)

The reaction was carried out using 1,2-dimethylbenzene (31.8 mg, 0.3 mmol) according to the General procedure.

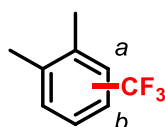

<sup>19</sup>F NMR yield: 34%

(*a*:*b* = 1.0:1.4)

### (7a) 1,2-Dimethyl-3-(trifluoromethyl)benzene

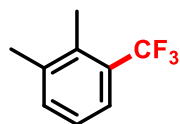

<sup>19</sup>F NMR (376 MHz, DMSO-*d*<sub>6</sub>/EtOAc):  $\delta = -59.9$  (s, 3F).

The data matched that of reported in the literature:  $\delta = -60.4$  (CDCl<sub>3</sub>) [19].

### (7b) 1,2-Dimethyl-4-(trifluoromethyl)benzene

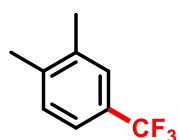

<sup>19</sup>F NMR (376 MHz, DMSO-*d*<sub>6</sub>/EtOAc):  $\delta = -61.71$  (s, 3F).

The data matched that of reported in the literature:  $\delta = -62.3$  (CDCl<sub>3</sub>) [19].

### (8) Trifluoromethylation of 1,2,4,5-Tetramethylbenzene (durene)

The reaction was carried out using 1,2,4,5-tetramethylbenzene (40.2 mg, 0.3 mmol) according to the General procedure.

#### 1,2,4,5-Tetramethyl-3-(trifluoromethyl)benzene

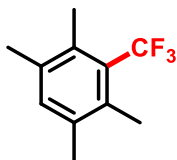

<sup>19</sup>F NMR yield: 38%.

<sup>19</sup>F NMR (376 MHz, DMSO-*d*<sub>6</sub>/EtOAc):  $\delta = -51.35$  (hept,  $J = 3.2$  Hz, 3F).

The data matched that of reported in the literature:  $\delta = -51.74$  (CDCl<sub>3</sub>) [20].

### (9) Trifluoromethylation of 1,3,5-trimethylbenzene (mesitylene)

The reaction was carried out using 1,3,5-trimethylbenzene (36 mg, 0.3 mmol) according to the General procedure.

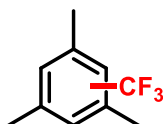

<sup>19</sup>F NMR yield: 78%

(mono-CF<sub>3</sub>:di-CF<sub>3</sub> = 12.5:1.0)

#### (9a) 1,3,5-Trimethyl-2-(trifluoromethyl)benzene

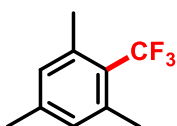

<sup>19</sup>F NMR (376 MHz, CDCl<sub>3</sub>/EtOAc):  $\delta = -53.80$  (p,  $J = 3.7$  Hz, 3F).

The data matched that of reported in the literature:  $\delta = -53.76$  (CDCl<sub>3</sub>) [21].

#### (9aa) 1,3,5-Trimethyl-2,4-bis(trifluoromethyl)benzene

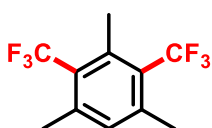

<sup>19</sup>F NMR (376 MHz, CDCl<sub>3</sub>/EtOAc):  $\delta = -53.00$  (p,  $J = 3.4$  Hz, 3F).

The data matched that of reported in the literature:  $\delta = -52.97$  (CDCl<sub>3</sub>) [21].

**(10) Trifluoromethylation of 2-bromo-1,3,5-trimethylbenzene**

The reaction was carried out using 2-bromo-1,3,5-trimethylbenzene (59.7 mg, 0.3 mmol) according to the General procedure.

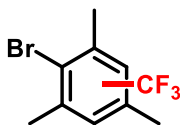

**<sup>19</sup>F NMR yield: 38%**

(mono-CF<sub>3</sub>:di-CF<sub>3</sub> = 37.2:1.0)

**(10a) 2-Bromo-1,3,5-trimethyl-4-(trifluoromethyl)benzene**

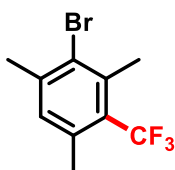

**<sup>19</sup>F NMR** (376 MHz, CDCl<sub>3</sub>/EtOAc):  $\delta = -53.12$  to  $-58.19$  (m, 3F).

The data matched that of reported in the literature:  $\delta = -54.10$  (CDCl<sub>3</sub>) [22].

**(10aa) 1-Bromo-2,4,6-trimethyl-3,5-bis(trifluoromethyl)benzene**

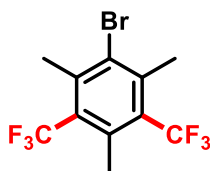

**<sup>19</sup>F NMR** (376 MHz, CDCl<sub>3</sub>/EtOAc):  $\delta -52.35$  to  $-52.42$  (m, 6F).

## (11) Trifluoromethylation of anisole

The reaction was carried out using methoxybenzene (32.4 mg, 0.3 mmol) according to the General procedure.

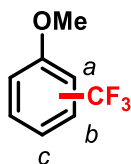

<sup>19</sup>F NMR yield: 57%

(*a*:*b*:*c* = 4.0:1.0:1.7)

### (11a) 1-Methoxy-2-(trifluoromethyl)benzene

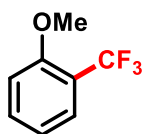

<sup>19</sup>F NMR (376 MHz, CDCl<sub>3</sub>/EtOAc):  $\delta = -62.58$  (s, 3F).

The data matched that of reported in the literature:  $\delta = -62.4$  (CDCl<sub>3</sub>) [12].

### (11b) 1-Methoxy-3-(trifluoromethyl)benzene

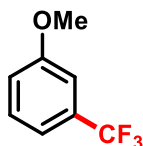

<sup>19</sup>F NMR (376 MHz, CDCl<sub>3</sub>/EtOAc):  $\delta = -62.88$  (s, 3F).

The data matched that of reported in the literature:  $\delta = -62.8$  (CDCl<sub>3</sub>) [12].

### (11c) 1-Methoxy-4-(trifluoromethyl)benzene

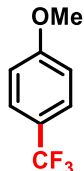

<sup>19</sup>F NMR (376 MHz, CDCl<sub>3</sub>/EtOAc):  $\delta = -61.63$  (s, 3F).

The data matched that of reported in the literature:  $\delta = -61.5$  (CDCl<sub>3</sub>) [12].

## (12) Trifluoromethylation of thioanisole

The reaction was carried out using thioanisole (36.9 mg, 0.3 mmol) according to the General procedure.

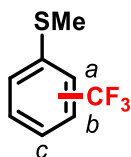

$^{19}\text{F}$  NMR yield: 33%

( $a:b:c = 4.4:2.8:1.0$ )

### (12a) Methyl(2-(trifluoromethyl)phenyl)sulfane

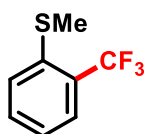

$^{19}\text{F}$  NMR (376 MHz,  $\text{CDCl}_3/\text{EtOAc}$ ):  $\delta = -61.94$  (s, 3F).

The data matched that of reported in the literature:  $\delta = -61.5$  ( $\text{CDCl}_3$ ) [23].

The data matched that of reported in the literature:  $\delta = -61.4$  ( $\text{CDCl}_3$ ) [12].

### (12b) Methyl(3-(trifluoromethyl)phenyl)sulfane

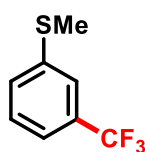

$^{19}\text{F}$  NMR (376 MHz,  $\text{CDCl}_3/\text{EtOAc}$ ):  $\delta = -62.47$  (s, 3F).

The data matched that of reported in the literature:  $\delta = -61.8$  ( $\text{CDCl}_3$ ) [12].

### (12c) Methyl(4-(trifluoromethyl)phenyl)sulfane

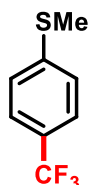

$^{19}\text{F}$  NMR (376 MHz,  $\text{CDCl}_3/\text{EtOAc}$ ):  $\delta = -63.03$  (s, 3F).

The data matched that of reported in the literature:  $\delta = -62.3$  ( $\text{CDCl}_3$ ) [23].

The data matched that of reported in the literature:  $\delta = -62.4$  ( $\text{CDCl}_3$ ) [12].

**(13) Trifluoromethylation of 1-methoxy-3-methylbenzene  
(3-methylanisole)**

The reaction was carried out using 1-methoxy-3-methylbenzene (36.6 mg, 0.3 mmol) according to the General procedure.

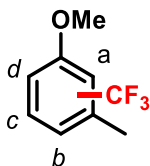

**<sup>19</sup>F NMR yield: 74%**

(*a*:*b*:*c*:*d* = 9.2:5.4:1.0:7.7)

**(13a) 1-Methoxy-3-methyl-2-(trifluoromethyl)benzene**

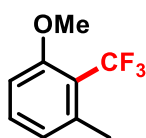

**<sup>19</sup>F NMR** (376 MHz, DMSO-*d*<sub>6</sub>/EtOAc):  $\delta = -54.23$  (q, *J* = 3.7 Hz, 3F).

The data matched that of reported in the literature:  $\delta = -53.74$  (CDCl<sub>3</sub>) [24].

**(13b) 4-Methoxy-2-methyl-1-(trifluoromethyl)benzene**

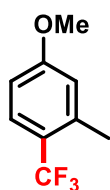

**<sup>19</sup>F NMR** (376 MHz, DMSO-*d*<sub>6</sub>/EtOAc):  $\delta = -61.35$  (s, 3F).

The data matched that of reported in the literature:  $\delta = -60.72$  (CDCl<sub>3</sub>) [24].

**(13c) 1-Methoxy-3-methyl-5-(trifluoromethyl)benzene**

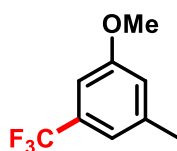

**<sup>19</sup>F NMR** (376 MHz, DMSO-*d*<sub>6</sub>/EtOAc):  $\delta = -62.14$  (s, 3F).

The data matched that of reported in the literature:  $\delta = -62.7$  (CDCl<sub>3</sub>) [25].

**(13d) 2-Methoxy-4-methyl-1-(trifluoromethyl)benzene**

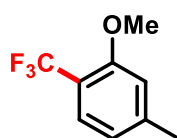

**<sup>19</sup>F NMR** (376 MHz, DMSO-*d*<sub>6</sub>/EtOAc):  $\delta = -59.70$  (s, 3F).

The data matched that of reported in the literature:  $\delta = -59.11$  (CDCl<sub>3</sub>) [24].

**(14) Trifluoromethylation of 1-methoxy-4-methylbenzene  
(4-methylanisole)**

The reaction was carried out using 4-methylanisole (36.6 mg, 0.3 mmol) according to the General procedure.

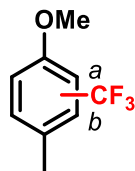

**<sup>19</sup>F NMR yield: 18%**

(*a*:*b* = 1.7:1.0)

**(14a) 1-Methoxy-4-methyl-2-(trifluoromethyl)benzene**

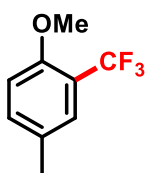

**<sup>19</sup>F NMR** (376 MHz, DMSO-*d*<sub>6</sub>/EtOAc):  $\delta = -61.69$  (s, 3F)

The data matched that of reported in the literature:  $\delta = -62.2$  (CDCl<sub>3</sub>) [12].

**(14b) 4-Methoxy-1-methyl-2-(trifluoromethyl)benzene**

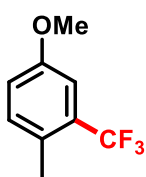

**<sup>19</sup>F NMR** (376 MHz, DMSO-*d*<sub>6</sub>/EtOAc):  $\delta = -61.47$  (d, 3F)

The data matched that of reported in the literature:  $\delta = -61.3$  (CDCl<sub>3</sub>) [12].

**(15) Trifluoromethylation of 4-methoxy-1,2-dimethylbenzene  
(3,4-dimethylanisole)**

The reaction was carried out using 3,4-dimethylanisole (40.8 mg, 0.3 mmol) according to the General procedure.

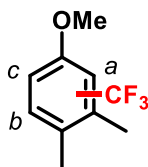

**<sup>19</sup>F NMR yield: 50%**

(*a*:*b*:*c* = 4.1:1.0:2.6)

Isomers were identified based on the effect of through-space H–F coupling [26,27]:

**(15a) 1-Methoxy-3,4-dimethyl-2-(trifluoromethyl)benzene**

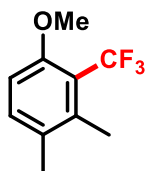

$^{19}\text{F}$  NMR (376 MHz, DMSO- $d_6$ /EtOAc):  $\delta = -52.95$  (q,  $J = 3.0$  Hz, 3F).

The data matched that of reported in the literature:  $\delta = -53.5$  (CDCl $_3$ ) [28].

**(15b) 5-Methoxy-1,2-dimethyl-3-(trifluoromethyl)benzene**

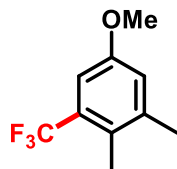

$^{19}\text{F}$  NMR (376 MHz, DMSO- $d_6$ /EtOAc):  $\delta = -60.17$  (d,  $J = 1.4$  Hz, 3F).

The isomer was identified by exclusion.

**(15c) 1-Methoxy-4,5-dimethyl-2-(trifluoromethyl)benzene**

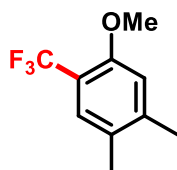

$^{19}\text{F}$  NMR (376 MHz, DMSO- $d_6$ /EtOAc):  $\delta = -61.10$  (s, 3F).

The data matched that of reported in the literature:  $\delta = -61.7$  (CDCl $_3$ ) [28].

**(16) Trifluoromethylation of 1-isopropyl-2-methoxy-4-methylbenzene**

The reaction was carried out using 1-isopropyl-2-methoxy-4-methylbenzene (49.2 mg, 0.3 mmol) according to the General procedure.

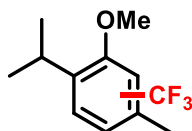

$^{19}\text{F}$  NMR yield of mixture of isomers: 45%

**Mixture (16): GC-MS (EI):**  $m/z$  calcd for C $_{12}$ H $_{15}$ F $_3$ O [M] $^+$  232; found 232. The products peaks were observed at 17.07 and 18.10 min.

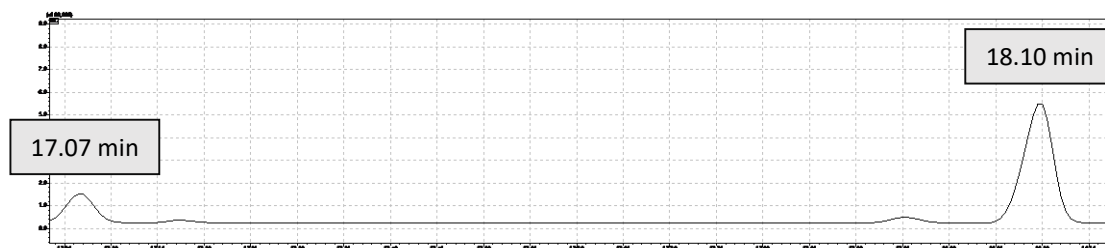

The EI-MS fragmentation spectra of compound, observed at 17.07 min:

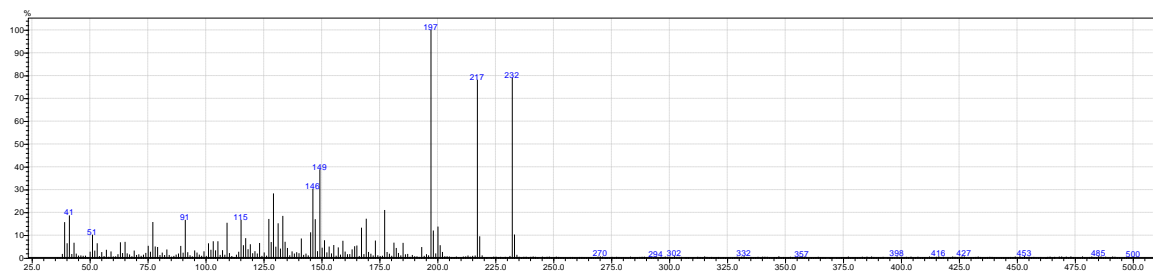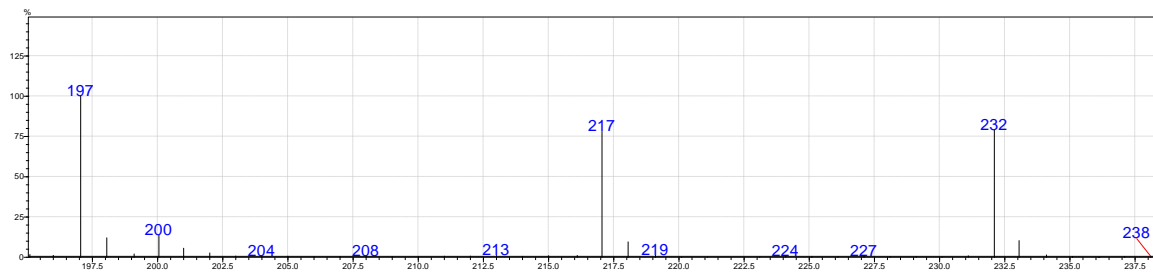

The EI-MS fragmentation spectra of compound, observed at 18.10 min:

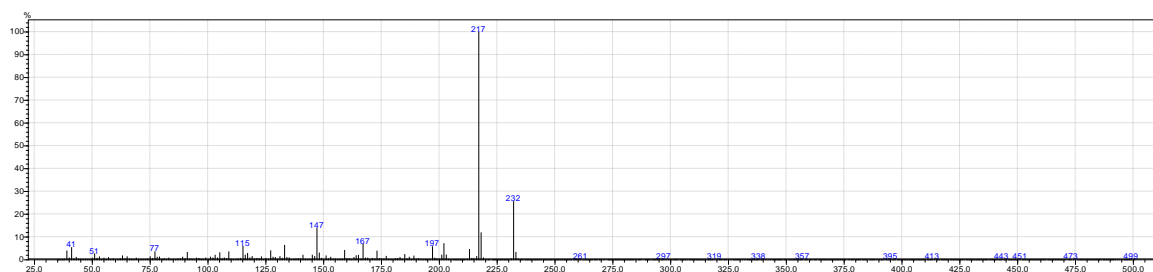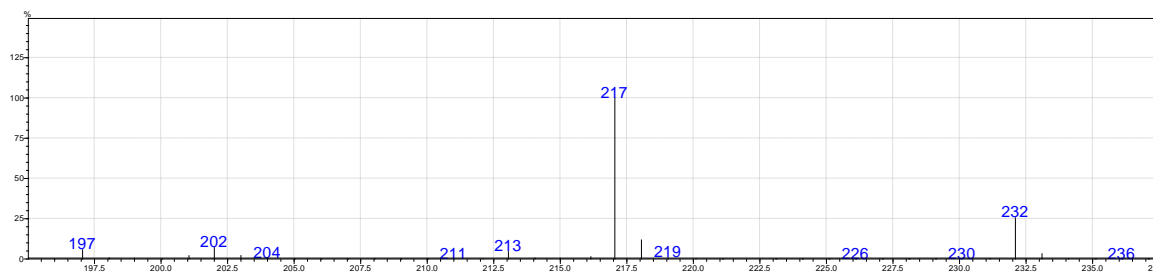

### (17) Trifluoromethylation of 1-methoxy-3,5-dimethylbenzene

The reaction was carried out using 1-methoxy-3,5-dimethylbenzene (40.8 mg, 0.3 mmol) according to the General procedure.

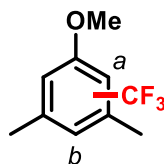

<sup>19</sup>F NMR yield: 92%

(*a*:*b* = 1.4:1.0;

mono-CF<sub>3</sub>:di-CF<sub>3</sub> = 8.9:1.0)

#### (17a) 1-Methoxy-3,5-dimethyl-2-(trifluoromethyl)benzene

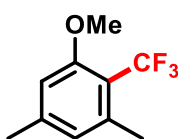

<sup>19</sup>F NMR (376 MHz, CDCl<sub>3</sub>/EtOAc): δ = -54.60 (q, *J* = 3.6 Hz, 3F).

The data matched that of reported in the literature: δ = -54.9 (CDCl<sub>3</sub>) [29].

#### (17b) 5-Methoxy-1,3-dimethyl-2-(trifluoromethyl)benzene

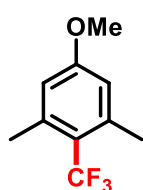

<sup>19</sup>F NMR (376 MHz, CDCl<sub>3</sub>/EtOAc): δ = -52.99 (hept, *J* = 3.4 Hz, 3F).

The data matched that of reported in the literature: δ = -53.3 (CDCl<sub>3</sub>) [29].

#### (17ab) 1-Methoxy-3,5-dimethyl-2,4-bis(trifluoromethyl)benzene

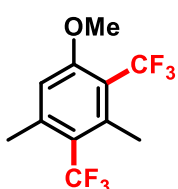

<sup>19</sup>F NMR (376 MHz, CDCl<sub>3</sub>/EtOAc): δ = -51.87 to -51.92 (m, 3F), -53.45 (q, 3F).

GC-MS (EI): *m/z* calcd for C<sub>11</sub>H<sub>10</sub>F<sub>6</sub>O [M]<sup>+</sup> 272; found 272. The products peak was observed at 16.71 min.

The EI-MS fragmentation spectra of compound (17ab):

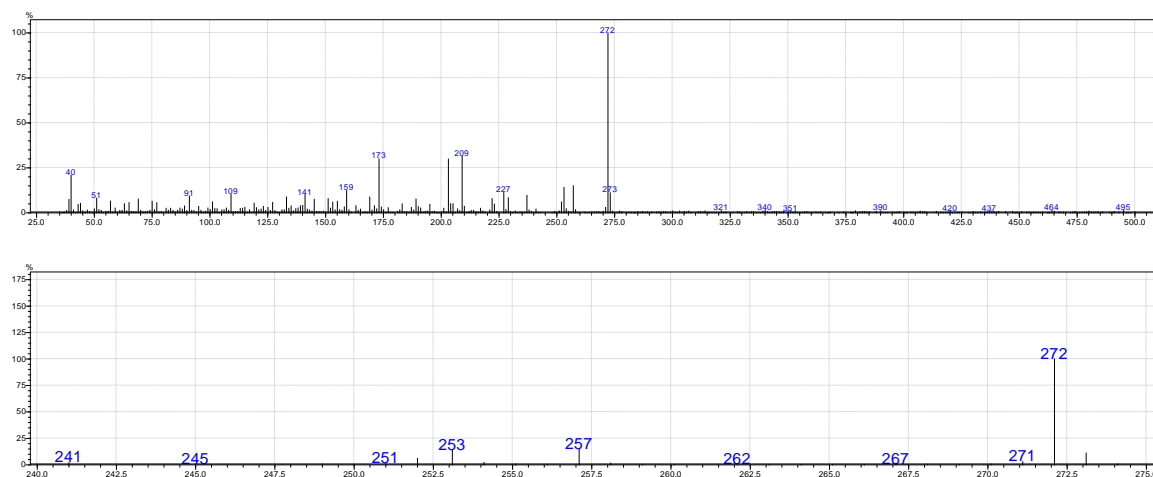

### (18) Trifluoromethylation of 1-methoxy-2,3,5-trimethylbenzene

The reaction was carried out using 1-methoxy-2,3,5-trimethylbenzene (45.0 mg, 0.3 mmol) according to the General procedure.

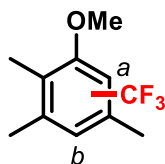

$^{19}\text{F}$  NMR yield: 33%

(*a*:*b* = 1.0:5.7)

Isomers were identified based on the effect of through-space H–F coupling [26,27]:

#### (18a) 3-Methoxy-1,2,5-trimethyl-4-(trifluoromethyl)benzene

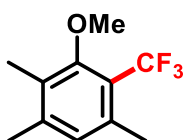

$^{19}\text{F}$  NMR (376 MHz, DMSO-*d*<sub>6</sub>/EtOAc):  $\delta$  = -54.13 (q, *J* = 3.3 Hz, 3F).

GC–MS (EI): *m/z* calcd for C<sub>11</sub>H<sub>13</sub>F<sub>3</sub>O [M]<sup>+</sup> 218; found 218. The products peak was observed at 17.45 min.

The EI–MS fragmentation spectra of compound (18a):

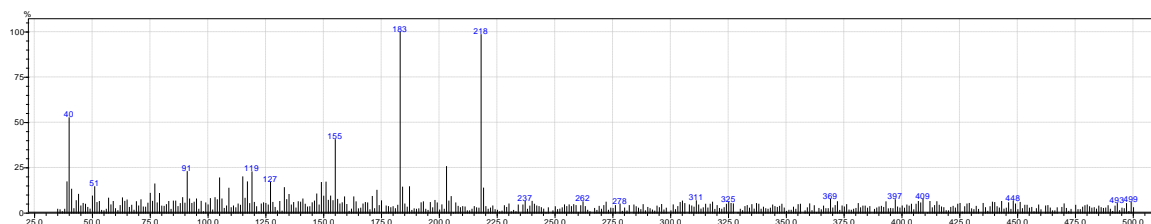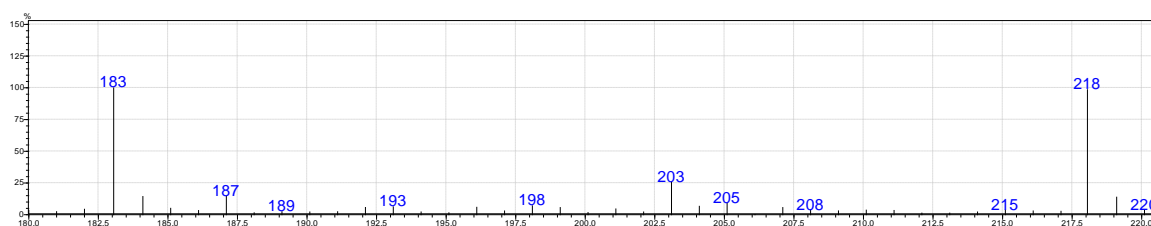

#### (18b) 1-Methoxy-2,3,5-trimethyl-4-(trifluoromethyl)benzene

The product (18b) was purified by column chromatography (eluent: 100% CyH) or HPLC and characterized (MeCN/H<sub>2</sub>O):

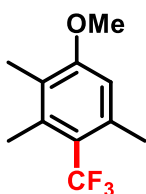

$^1\text{H}$  NMR (400 MHz, CDCl<sub>3</sub>):  $\delta$  6.54 (s, 1H), 3.83 (s, 1H), 2.47 (q, *J* = 4.1 Hz, 3H), 2.35 (q, *J* = 2.5 Hz, 3H), 2.14 (s, 3H).

$^{19}\text{F}$  NMR (376 MHz, CDCl<sub>3</sub>):  $\delta$  = -51.60 to -51.67 (m).

**<sup>13</sup>C NMR** (101 MHz, CDCl<sub>3</sub>): δ 158.74 – 158.71 (m), 137.87 (q, J = 1.9 Hz), 135.71 (q, J = 2.1 Hz), 126.62 (q, J = 275.2 Hz), 124.44, 120.30 (q, J = 27.9 Hz), 111.52, 55.57, 22.59 (q, J = 4.8 Hz), 17.03 (q, J = 4.2 Hz), 11.75.

**<sup>19</sup>F NMR** (376 MHz, DMSO-*d*<sub>6</sub>/EtOAc): δ -51.02 (qq, J = 4.2, 2.3 Hz, 3F).

**GC–MS** (EI): m/z calcd for C<sub>11</sub>H<sub>13</sub>F<sub>3</sub>O [M<sup>+</sup>] 218; found 218. The products peak was observed at 19.02 min.

The EI–MS fragmentation spectra of compound (**18b**):

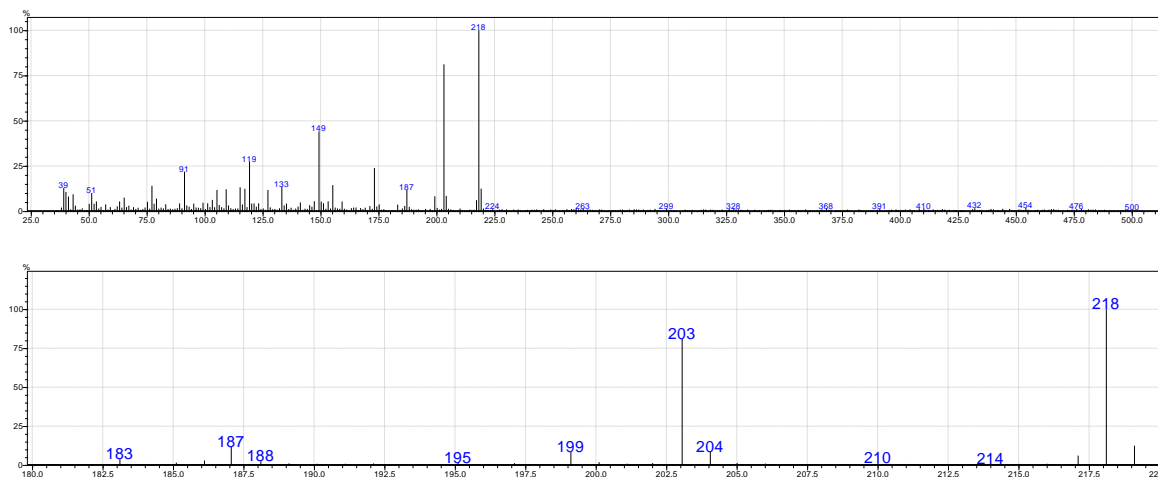

### (19) Trifluoromethylation of 1,2-dimethoxybenzene

The reaction was carried out using 1,2 -dimethoxybenzene (41.4 mg, 0.3 mmol) according to the General procedure.

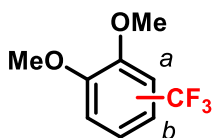

**<sup>19</sup>F NMR yield: 56%**

(*a*:*b* = 1.0:5.1)

#### (19a) 1,2-Dimethoxy-3-(trifluoromethyl)benzene

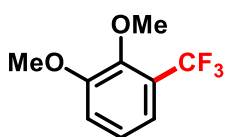

**<sup>19</sup>F NMR** (376 MHz, DMSO-*d*<sub>6</sub>/EtOAc): δ = -60.78 (s, 3F).

The data matched that of reported in the literature: δ = -61.36 (CDCl<sub>3</sub>) [19] or δ = -61.3 (CDCl<sub>3</sub>) [30].

#### (19b) 1,2-Dimethoxy-4-(trifluoromethyl)benzene

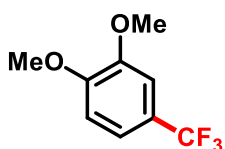

**<sup>19</sup>F NMR** (376 MHz, DMSO-*d*<sub>6</sub>/EtOAc): δ -60.82 (s, 3F).

The data matched that of reported in the literature: δ = -61.4 (CDCl<sub>3</sub>) [31] or δ = -61.6 (CDCl<sub>3</sub>) [32].

## (20) Trifluoromethylation of 1,3-dimethoxybenzene

The reaction was carried out using 1,3-dimethoxybenzene (41.4 mg, 0.3 mmol) according to the General procedure.

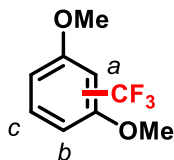

$^{19}\text{F}$  NMR yield: 49%

(*a*:*b*:*c* = 1.0:1.8:0)

### (20a) 1,3-Dimethoxy-2-(trifluoromethyl)benzene

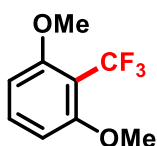

$^{19}\text{F}$  NMR (376 MHz, DMSO-*d*<sub>6</sub>/EtOAc):  $\delta$  = -54.11 (s, 3F).

The data matched that of reported in the literature:  $\delta$  = -54.9 (CDCl<sub>3</sub>) [31].

### (20b) 2,4-Dimethoxy-1-(trifluoromethyl)benzene

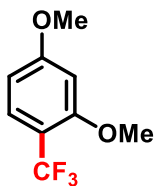

$^{19}\text{F}$  NMR (376 MHz, DMSO-*d*<sub>6</sub>/EtOAc):  $\delta$  = -60.54 (s, 3F).

The data matched that of reported in the literature:  $\delta$  = -61.3 (CDCl<sub>3</sub>) [31].

## (21) Trifluoromethylation of 1,4-dimethoxybenzene

The reaction was carried out using 1,4-dimethoxybenzene (41.4 mg, 0.3 mmol) according to the General procedure.

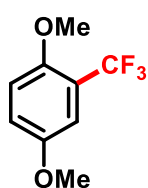

### 1,4-Dimethoxy-2-(trifluoromethyl)benzene

$^{19}\text{F}$  NMR yield: 48%

$^{19}\text{F}$  NMR (376 MHz, DMSO-*d*<sub>6</sub>/EtOAc):  $\delta$  = -61.79 (s, 3F).

The data matched that of reported in the literature:  $\delta$  = -62.42 (CDCl<sub>3</sub>) [12].

## (22) Trifluoromethylation of 3,5-dimethoxytoluene

The reaction was carried out using 3,5-dimethoxytoluene (45.6 mg, 0.3 mmol) according to the General procedure.

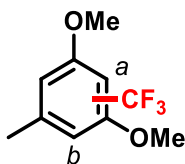

$^{19}\text{F}$  NMR yield: 96%

(mono:bis = 13.1:1.0,

$a:b:ab:bb = 8.8:29.4:1.0:1.9$ )

### (22a) 1,3-Dimethoxy-5-methyl-2-(trifluoromethyl)benzene

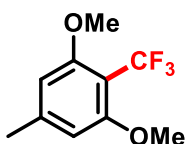

$^{19}\text{F}$  NMR (376 MHz, DMSO- $d_6$ /EtOAc):  $\delta = -53.77$  (s, 3F).

The data matched that of reported in the literature:  $\delta = -54.63$  ( $\text{CDCl}_3$ ) [33].

### (22b) 1,5-Dimethoxy-3-methyl-2-(trifluoromethyl)benzene

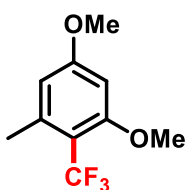

$^{19}\text{F}$  NMR (376 MHz, DMSO- $d_6$ /EtOAc):  $\delta = -53.18$  (q,  $J = 3.6$  Hz, 3F).

The data matched that of reported in the literature:  $\delta = -53.86$  ( $\text{CDCl}_3$ ) [33].

### (22ab) 1,3-Dimethoxy-5-methyl-2,4-bis(trifluoromethyl)benzene

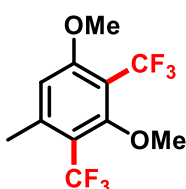

$^{19}\text{F}$  NMR (376 MHz, DMSO- $d_6$ /EtOAc):  $\delta = -53.86$  (q,  $J = 3.4$  Hz, 3F),  $-56.04$  (s, 3F).

GC-MS (EI):  $m/z$  calcd for  $\text{C}_{11}\text{H}_{10}\text{F}_6\text{O}_2$   $[\text{M}]^+$  288; found 288. The product peak was observed at 18.99 min.

The EI-MS fragmentation spectra of compound (22ab):

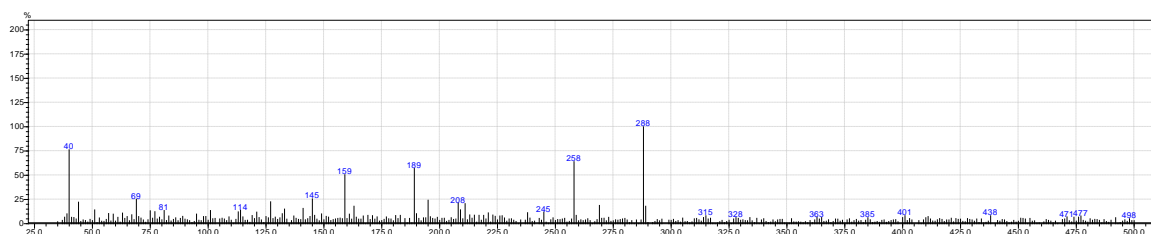

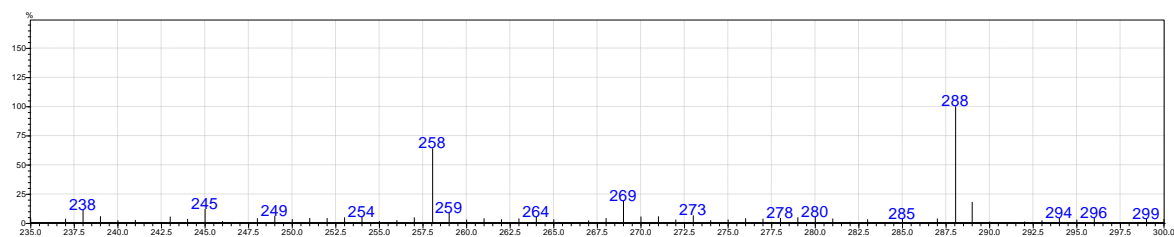

**(22bb) 1,5-Dimethoxy-3-methyl-2,4-bis(trifluoromethyl)benzene**

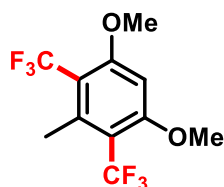

$^{19}\text{F}$  NMR (376 MHz,  $\text{DMSO-}d_6/\text{EtOAc}$ ):  $\delta = -51.89$  (q,  $J = 2.8$  Hz, 6F).

GC-MS (EI):  $m/z$  calcd for  $\text{C}_{11}\text{H}_{10}\text{F}_6\text{O}_2$   $[\text{M}]^+$  288; found 288. The product peak was observed at 21.05 min.

The EI-MS fragmentation spectra of compound **(22bb)**:

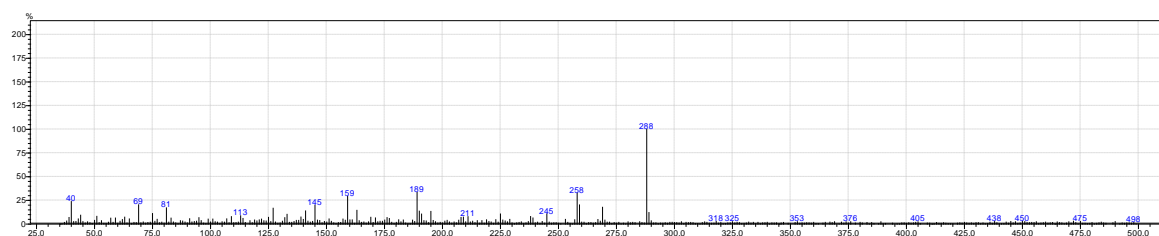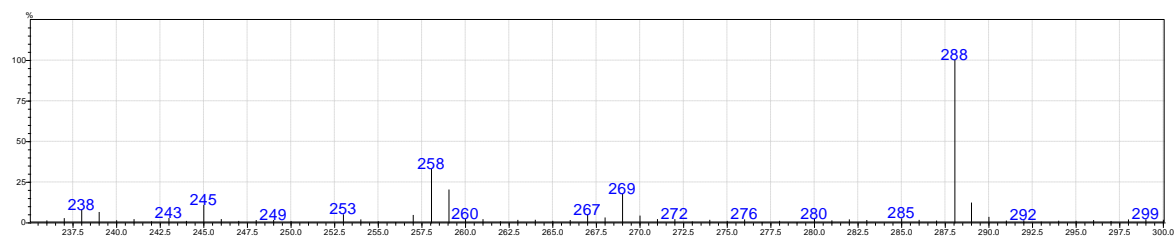

**(23) Trifluoromethylation of 1,2,3-trimethoxybenzene**

The reaction was carried out using 1,2,3-dimethoxybenzene (50.4 mg, 0.3 mmol) according to the General procedure.

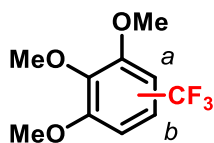

$^{19}\text{F}$  NMR yield: 32%

( $a:b = 1.7:1.0$ )

**(23a) 1,2,3-Trimethoxy-4-(trifluoromethyl)benzene**

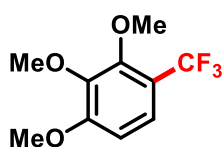

$^{19}\text{F}$  NMR (376 MHz,  $\text{DMSO-}d_6/\text{EtOAc}$ ):  $\delta = -60.09$  (s, 3F).

The data matched that of reported in the literature:  $\delta = -60.86$  ( $\text{CDCl}_3$ )<sup>26</sup>.

**(23b) 1,2,3-Trimethoxy-5-(trifluoromethyl)benzene**

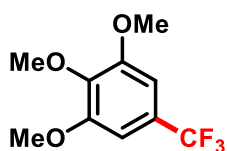

$^{19}\text{F}$  NMR (376 MHz, DMSO- $d_6$ /EtOAc):  $\delta = -61.37$  (s, 3F).

The data matched that of reported in the literature:  $\delta = -62.07$  (CDCl $_3$ )<sup>26</sup>.

**(24) Trifluoromethylation of acetophenone**

The reaction was carried out using acetophenone (36 mg, 0.3 mmol) according to the General procedure.

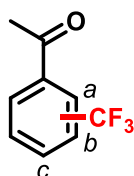

$^{19}\text{F}$  NMR yield: 12%

( $a:b:c = 2.2:1.0:1.4$ )

**(24a) 1-(2-(Trifluoromethyl)phenyl)ethan-1-one**

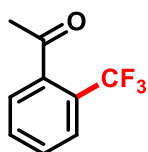

$^{19}\text{F}$  NMR (376 MHz, DMSO- $d_6$ /EtOAc)  $\delta = -57.83$  (s, 3F).

The data matched that of reported in the literature:  $\delta = -58.2$  (CDCl $_3$ )<sup>6</sup>.

**(24b) 1-(3-(Trifluoromethyl)phenyl)ethan-1-one**

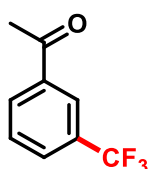

$^{19}\text{F}$  NMR (376 MHz, DMSO- $d_6$ /EtOAc)  $\delta = -62.25$  (s, 3F).

The data matched that of reported in the literature:  $\delta = -62.8$  (CDCl $_3$ )<sup>27</sup>.

**(24c) 1-(4-(Trifluoromethyl)phenyl)ethan-1-one**

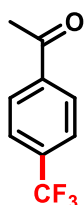

$^{19}\text{F}$  NMR (376 MHz, DMSO- $d_6$ /EtOAc)  $\delta = -62.56$  (s, 3F).

The data matched that of reported in the literature:  $\delta = -63.1$  (CDCl $_3$ )<sup>28</sup>.

## (25) Trifluoromethylation of methyl benzoate

The reaction was carried out using methyl benzoate (40.8 mg, 0.3 mmol) according to the General procedure.

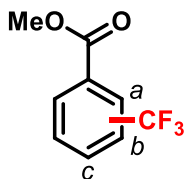

$^{19}\text{F}$  NMR yield: 14%

(*a*:*b*:*c* = 1.9:1.0:1.5)

### (25a) Methyl 2-(trifluoromethyl)benzoate

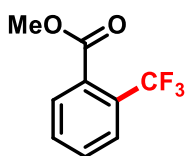

$^{19}\text{F}$  NMR (376 MHz,  $\text{CDCl}_3/\text{EtOAc}$ ):  $\delta = -59.82$  (s, 3F).

The data matched that of reported in the literature:  $\delta = -59.79$  ( $\text{CDCl}_3$ ) [14].

### (25b) Methyl 3-(trifluoromethyl)benzoate

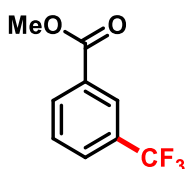

$^{19}\text{F}$  NMR (376 MHz,  $\text{CDCl}_3/\text{EtOAc}$ ):  $\delta = -62.99$  (s, 3F).

The data matched that of reported in the literature:  $\delta = -62.82$  ( $\text{CDCl}_3$ ) [37].

### (25c) Methyl 4-(trifluoromethyl)benzoate

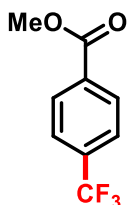

$^{19}\text{F}$  NMR (376 MHz,  $\text{CDCl}_3/\text{EtOAc}$ ):  $\delta = -63.26$  (s, 3F).

The data matched that of reported in the literature:  $\delta = -63.27$  ( $\text{CDCl}_3$ ) [14].

## (26) Trifluoromethylation of 1-(3,4,5-trimethoxyphenyl)ethan-1-one (3,4,5-trimethoxyacetophenone)

The reaction was carried out using 3,4,5-trimethoxyacetophenone (63 mg, 0.3 mmol) according to the General procedure.

### (26) 1-(3,4,5-Trimethoxy-2-(trifluoromethyl)phenyl)ethan-1-one

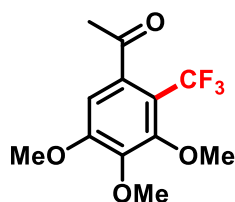

$^{19}\text{F}$  NMR yield: 40%

$^{19}\text{F}$  NMR (376 MHz,  $\text{DMSO}-d_6/\text{EtOAc}$ )  $\delta = -54.72$  (s, 3F).

The data matched that of reported in the literature:  $\delta = -55.0$  ( $\text{CDCl}_3$ ) [31].

### (27) Trifluoromethylation of 1-methyl-1H-indole

The reaction was carried out using 1-methyl-1H-indole (41.2 mg, 0.3 mmol) according to the General procedure.

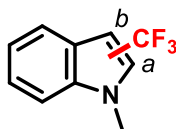

<sup>19</sup>F NMR yield: 23%

(*a*:*b* = 1.0:1.1)

Isomer was identified based on the effect of through-space H–F coupling.

#### (27a) 1-Methyl-2-(trifluoromethyl)-1H-indole

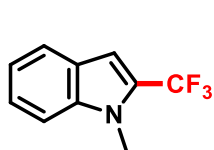

<sup>19</sup>F NMR (376 MHz, DMSO-*d*<sub>6</sub>/EtOAc):  $\delta = -56.70$  (qq, *J* = 5.67, 1.29 Hz, 3F).

The data matched that of reported in the literature:  $\delta = -56.74$  (CDCl<sub>3</sub>) [38].

#### (27b) 1-Methyl-3-(trifluoromethyl)-1H-indole

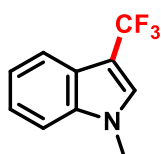

<sup>19</sup>F NMR (376 MHz, DMSO-*d*<sub>6</sub>/EtOAc):  $\delta = -57.79$  (s, 3F).

The data matched that of reported in the literature:  $\delta = -56.76$  (CDCl<sub>3</sub>) [39].

### (28) Trifluoromethylation of *tert*-butyl-1H-indole-1-carboxylate

The reaction was carried out using *tert*-butyl 1H-indole-1-carboxylate (65.1 mg, 0.3 mmol) according to the General procedure.

#### (28) *tert*-Butyl 3-(trifluoromethyl)-1H-indole-1-carboxylate

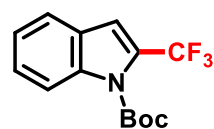

<sup>19</sup>F NMR yield: 37%

<sup>19</sup>F NMR (376 MHz, CDCl<sub>3</sub>/EtOAc)  $\delta = -58.32$  (s, 3F).

The data matched that of reported in the literature:  $\delta = -58.15$  (CDCl<sub>3</sub>) [40].

### (29) Trifluoromethylation of thiophene

The reaction was carried out using thiophene (24.9 mg, 0.3 mmol) according to the General procedure.

#### (29) 2-(Trifluoromethyl)thiophene

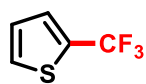

<sup>19</sup>F NMR yield: 51%

<sup>19</sup>F NMR (376 MHz, DMSO-*d*<sub>6</sub>/EtOAc)  $\delta = -54.43$  to  $-54.46$  (m, 3F).

The data matched that of reported in the literature:  $\delta = -55.44$  (CDCl<sub>3</sub>) [41].

### (30) Trifluoromethylation of 2-bromothiophene

The reaction was carried out using 2-bromothiophene (48.9 mg, 0.3 mmol) according to the General procedure.

#### (30) 2-Bromo-5-(trifluoromethyl)thiophene

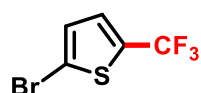

<sup>19</sup>F NMR yield: 30%

<sup>19</sup>F NMR (376 MHz, DMSO-*d*<sub>6</sub>/EtOAc)  $\delta = -55.34$  to  $-55.39$  (m, 3F).

The data matched that of reported in the literature:  $\delta = -56.32$  (CDCl<sub>3</sub>) [42].

### (31) Trifluoromethylation of caffeine

The reaction was carried out using caffeine (58.2 mg, 0.3 mmol) according to the General procedure.

#### (31) 1,3,7-Trimethyl-8-(trifluoromethyl)-3,7-dihydro-1*H*-purine-2,6-dione

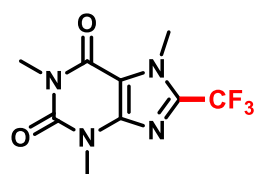

<sup>19</sup>F NMR yield: 27%

<sup>19</sup>F NMR (376 MHz, DMSO-*d*<sub>6</sub>):  $\delta = -62.16$  (q, *J* = 1.4 Hz, 3F).

The data matched that of reported in the literature:  $\delta = -62.7$  (CDCl<sub>3</sub>) [31].

### (32) Trifluoromethylation of chlorobenzene

The reaction was carried out using chlorobenzene (33.8 mg, 0.3 mmol) according to the General procedure.

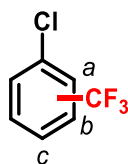

<sup>19</sup>F NMR yield: 17%

(*a*:*b*:*c* = 1.3:2.6:1.0)

#### (32a) 1-Chloro-2-(trifluoromethyl)benzene

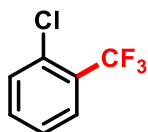

<sup>19</sup>F NMR (376 MHz, DMSO-*d*<sub>6</sub>/EtOAc):  $\delta = -62.10$  (s, 3F).

The data matched that of reported in the literature:  $\delta = -62.65$  (CDCl<sub>3</sub>) [43].

#### (32b) 1-Chloro-3-(trifluoromethyl)benzene

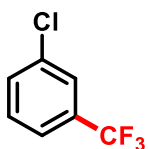

<sup>19</sup>F NMR (376 MHz, DMSO-*d*<sub>6</sub>/EtOAc):  $\delta = -62.15$  (s, 3F).

The data matched that of reported in the literature:  $\delta = -62.67$  (CDCl<sub>3</sub>) [44].

#### (32c) 1-Chloro-4-(trifluoromethyl)benzene

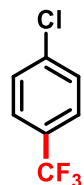

<sup>19</sup>F NMR (376 MHz, DMSO-*d*<sub>6</sub>/EtOAc):  $\delta = -62.37$  (s, 3F).

The data matched that of reported in the literature:  $\delta = -62.92$  (CDCl<sub>3</sub>) [43].

### (33) Trifluoromethylation of bromobenzene

The reaction was carried out using bromobenzene (47.1 mg, 0.3 mmol) according to the General procedure.

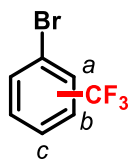

<sup>19</sup>F NMR yield: 13%

(*a*:*b*:*c* = 2.4:1.3:1.0)

#### (33a) 1-Bromo-2-(trifluoromethyl)benzene

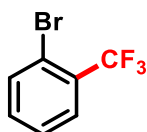

<sup>19</sup>F NMR (376 MHz, DMSO-*d*<sub>6</sub>/EtOAc):  $\delta = -62.17$  (s, 3F).

The data matched that of reported in the literature:  $\delta = -62.70$  (CDCl<sub>3</sub>) [43].

#### (33b) 1-Bromo-3-(trifluoromethyl)benzene

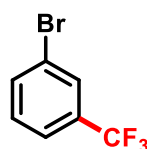

<sup>19</sup>F NMR (376 MHz, DMSO-*d*<sub>6</sub>/EtOAc):  $\delta = -62.26$  (s, 3F).

The data matched that of reported in the literature:  $\delta = -62.79$  (CDCl<sub>3</sub>) [43].

#### (33c) 1-Bromo-4-(trifluoromethyl)benzene

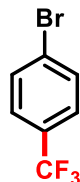

<sup>19</sup>F NMR (376 MHz, DMSO-*d*<sub>6</sub>/EtOAc):  $\delta = -62.36$  (s, 3F).

The data matched that of reported in the literature:  $\delta = -62.91$  (CDCl<sub>3</sub>) [43].

### (34) Trifluoromethylation of iodobenzene

The reaction was carried out using iodobenzene (61.2 mg, 0.3 mmol) according to the General procedure.

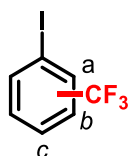

$^{19}\text{F}$  NMR yield: 16%

( $a:b:c = 2.0:1.0:1.1$ )

#### (34a) 1-Iodo-2-(trifluoromethyl)benzene

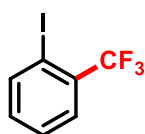

$^{19}\text{F}$  NMR (376 MHz, DMSO- $d_6$ /EtOAc):  $\delta = -62.18$  (s, 3F).

The data matched that of reported in the literature:  $\delta = -62.81$  (CDCl<sub>3</sub>) [43].

#### (34b) 1-Iodo-3-(trifluoromethyl)benzene

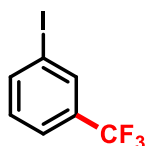

$^{19}\text{F}$  NMR (376 MHz, DMSO- $d_6$ /EtOAc):  $\delta = -62.40$  (s, 3F).

The data matched that of reported in the literature:  $\delta = -62.90$  (CDCl<sub>3</sub>) [43].

#### (34c) 1-Iodo-4-(trifluoromethyl)benzene

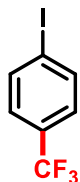

$^{19}\text{F}$  NMR (376 MHz, DMSO- $d_6$ /EtOAc):  $\delta = -62.48$  (s, 3F).

The data matched that of reported in the literature:  $\delta = -62.99$  (CDCl<sub>3</sub>) [43].

### (35) Trifluoromethylation of 1-chloro-3-methylbenzene

#### (3-chlorotoluene)

The reaction was carried out using 1-chloro-3-methylbenzene (38 mg, 0.3 mmol) according to the General procedure.

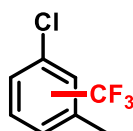

$^{19}\text{F}$  NMR yield of mixture of isomers: 20%

**(36) Trifluoromethylation of 1-bromo-2-methylbenzene  
(2-bromotoluene)**

The reaction was carried out using 1-bromo-2-methylbenzene (51.3 mg, 0.3 mmol) according to the General procedure.

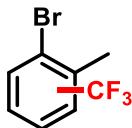

<sup>19</sup>F NMR yield of mixture of isomers: 10%

**(37) Trifluoromethylation of 1-bromo-3-methylbenzene (3-bromotoluene)**

The reaction was carried out using 1-bromo-3-methylbenzene (51.3 mg, 0.3 mmol) according to the General procedure.

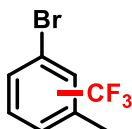

<sup>19</sup>F NMR yield of mixture of isomers: 13%

**(38) Trifluoromethylation of 1-bromo-4-methylbenzene  
(4-bromotoluene)**

The reaction was carried out using 1-bromo-4-methylbenzene (51.3 mg, 0.3 mmol) according to the General procedure.

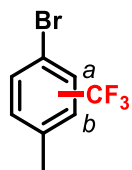

<sup>19</sup>F NMR yield: 16%

(*a*:*b* = 1.0:1.4)

Isomers were identified based on the effect of through-space H–F coupling [26,27]:

**(38a) 1-Bromo-4-methyl-2-(trifluoromethyl)benzene**

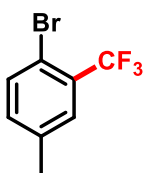

<sup>19</sup>F NMR (376 MHz, DMSO-*d*<sub>6</sub>/EtOAc): δ = -62.08 (s, 3F).

**(38b) 4-Bromo-1-methyl-2-(trifluoromethyl)benzene**

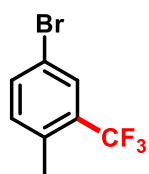

$^{19}\text{F}$  NMR (376 MHz, DMSO- $d_6$ /EtOAc):  $\delta = -61.68$  (q, 3F).

**(39) Trifluoromethylation of 1-bromo-2-methoxybenzene  
(2-bromoanisole)**

The reaction was carried out using 2-bromoanisole (56.1 mg, 0.3 mmol) according to the General procedure.

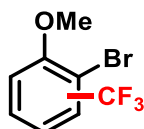

$^{19}\text{F}$  NMR yield of mixture of isomers: 26%

**(40) Trifluoromethylation of 1-bromo-3-methoxybenzene  
(3-bromoanisole)**

The reaction was carried out using 3-bromoanisole (56.1 mg, 0.3 mmol) according to the General procedure.

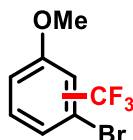

$^{19}\text{F}$  NMR yield of mixture of isomers: 30%

**(41) Trifluoromethylation of 1-bromo-4-methoxybenzene  
(4-bromoanisole)**

The reaction was carried out using 4-bromoanisole (56.1 mg, 0.3 mmol) according to the General procedure.

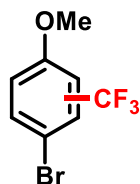

$^{19}\text{F}$  NMR yield of mixture of isomers: 22%

**(42) Trifluoromethylation of 4-bromo-1-methoxy-2-methylbenzene**

The reaction was carried out using 4-bromo-1-methoxy-2-methylbenzene (60.3 mg, 0.3 mmol) according to the General procedure.

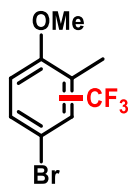

**<sup>19</sup>F NMR yield of mixture of isomers: 12%**

**(43) Trifluoromethylation of 1-bromo-4-methoxy-2-methylbenzene**

The reaction was carried out using 1-bromo-4-methoxy-2-methylbenzene (60.3 mg, 0.3 mmol) according to the General procedure.

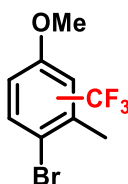

**<sup>19</sup>F NMR yield of mixture of isomers: 42%**

**(44) Trifluoromethylation of 5-bromo-2-methoxy-1,3-dimethylbenzene**

The reaction was carried out using 5-bromo-2-methoxy-1,3-dimethylbenzene (64.5 mg, 0.3 mmol) according to the General procedure.

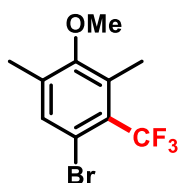

**1-Bromo-4-methoxy-3,5-dimethyl-2-(trifluoromethyl)benzene**

**<sup>19</sup>F NMR yield: 22%**

The product (31) was purified by column chromatography (eluent: 100% CyH) and characterized:

**<sup>1</sup>H NMR** (400 MHz, CDCl<sub>3</sub>): δ 7.40 (s, 1H), 3.69 (s, 3H), 2.43 (q, *J* = 3.4 Hz, 3H), 2.29 (s, 3H).

**<sup>19</sup>F NMR** (376 MHz, DMSO-*d*<sub>6</sub>/EtOAc): δ = -54.56 (q, *J* = 3.5 Hz, 3F).

**<sup>13</sup>C NMR** ((101 MHz, CDCl<sub>3</sub>): δ 156.97, 136.30 (q, *J* = 0.7 Hz), 135.38, 133.64 (q, *J* = 1.3 Hz), 127.37 (q, *J* = 29.7 Hz), 123.99 (q, *J* = 276.0 Hz), 114.98 (q, *J* = 2.5 Hz), 60.19, 16.21, 13.52 (q, *J* = 4.6 Hz).

**GC-MS** (EI): *m/z* calcd for C<sub>10</sub>H<sub>10</sub>BrF<sub>3</sub>O [M]<sup>+</sup> 284 and 282; found 284 and 282. The product peak was observed at 21.66 min.

The EI-MS fragmentation spectra of compound (**44**):

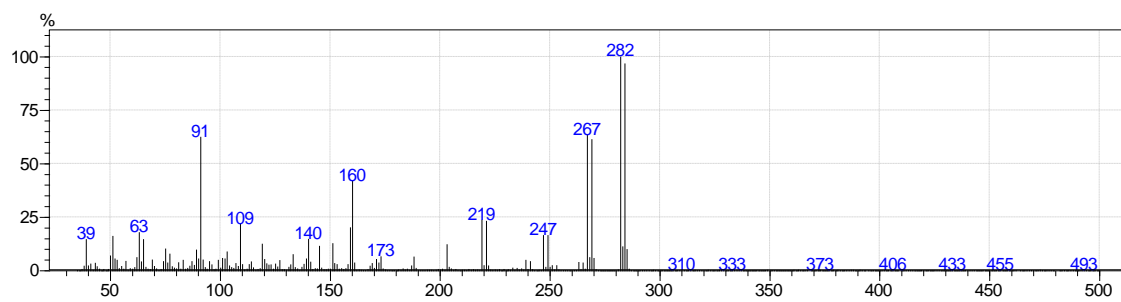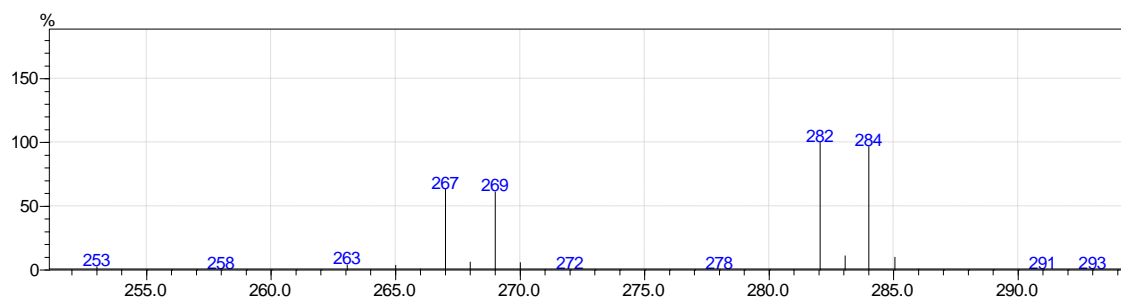

## 10. NMR spectra

(1)  $^{19}\text{F}$  NMR (376 MHz,  $\text{CDCl}_3/\text{EtOAc}$ ) for trifluoromethylation of 1,3,5-trimethoxybenzene

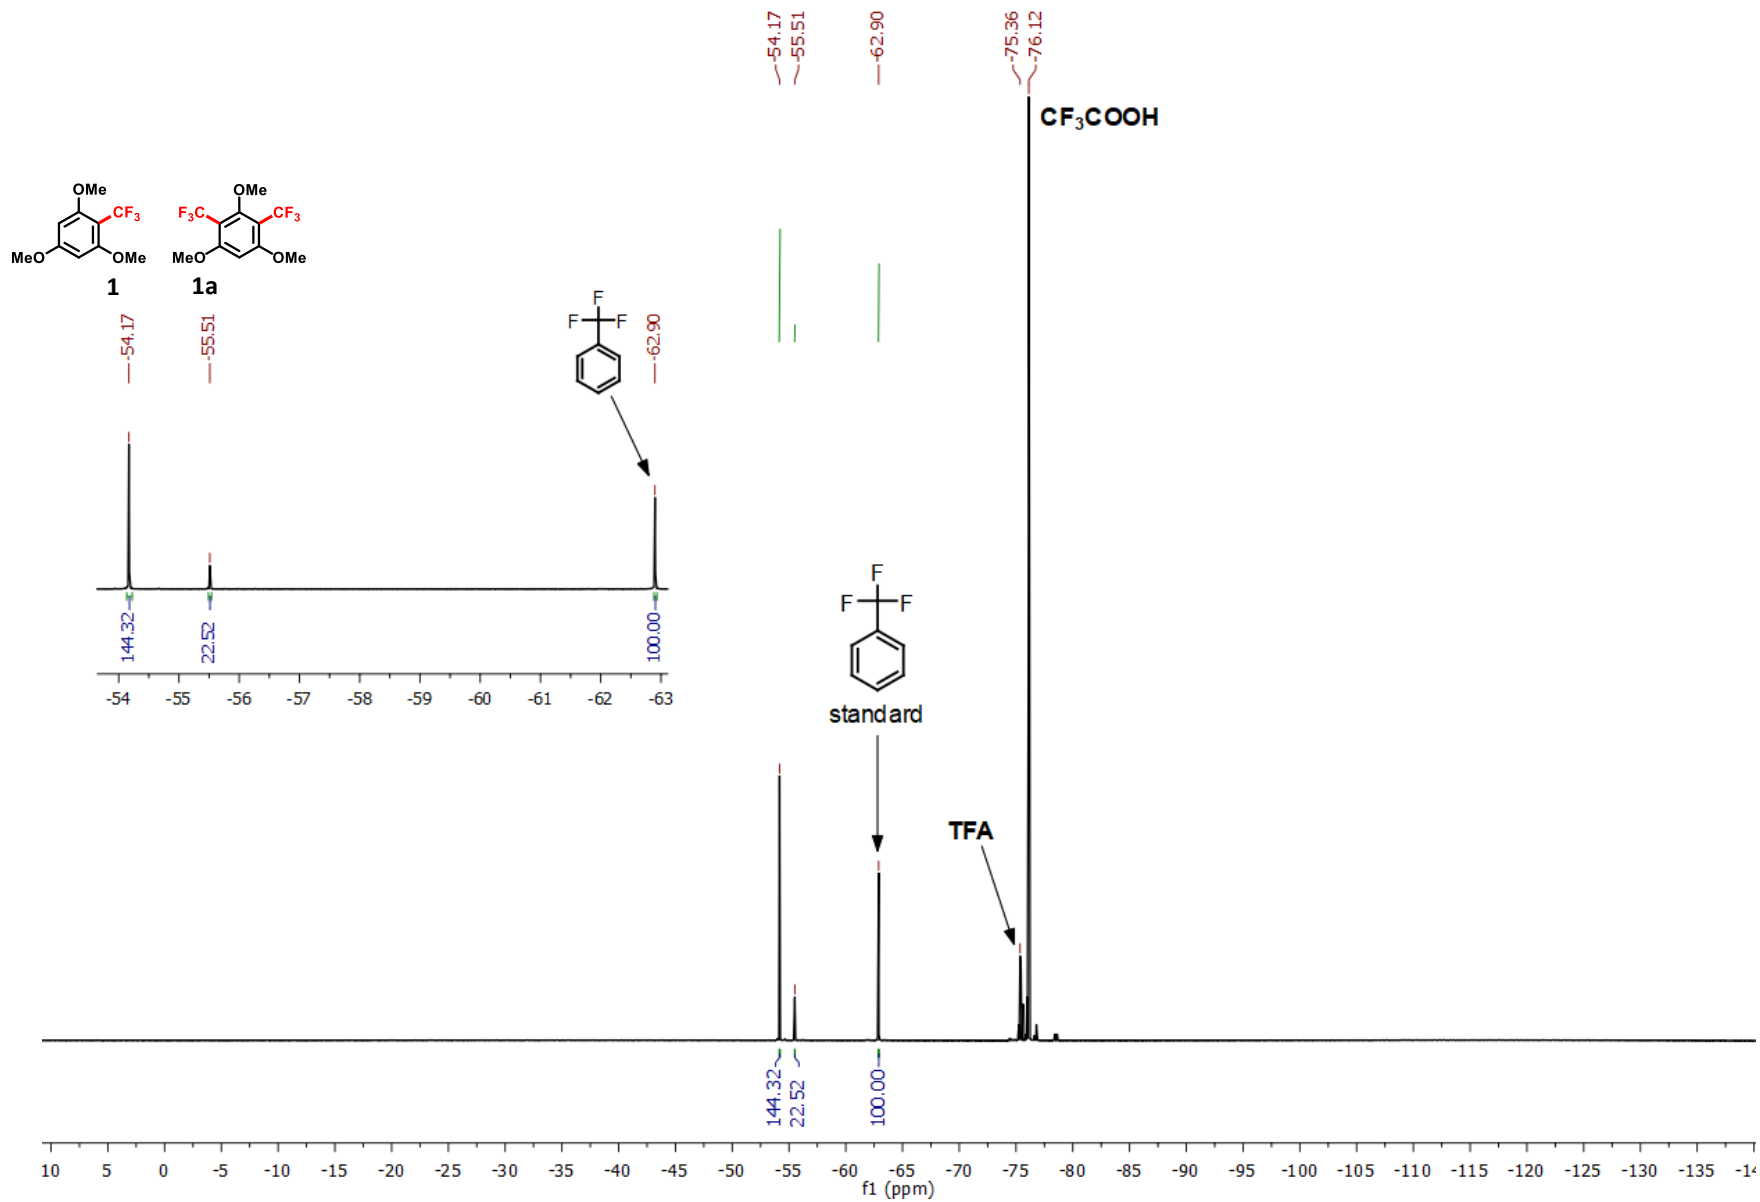

(2)  $^{19}\text{F}$  NMR (376 MHz,  $\text{DMSO-}d_6/\text{EtOAc}$ ) for trifluoromethylation of benzene

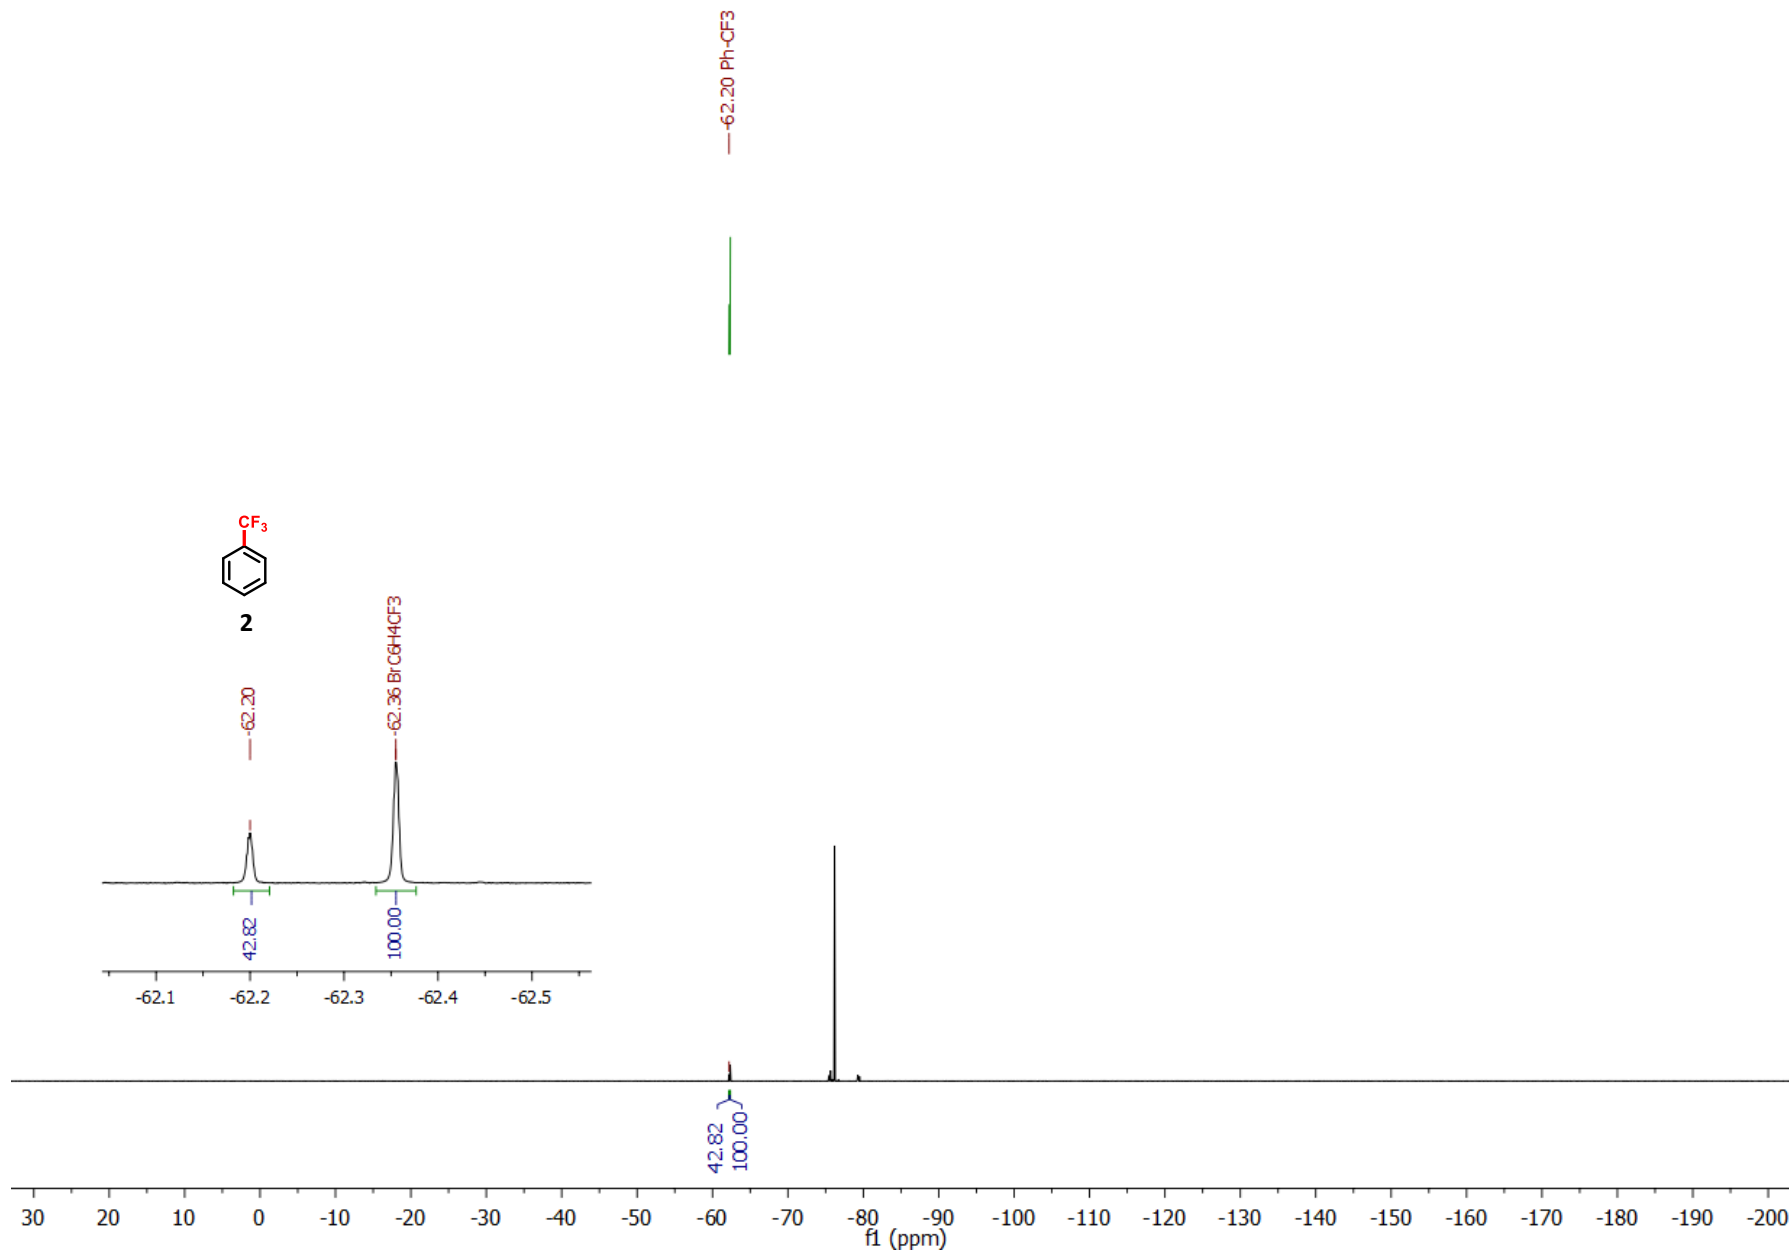

(3)  $^{19}\text{F}$  NMR (376 MHz,  $\text{DMSO-}d_6/\text{EtOAc}$ ) for trifluoromethylation of toluene

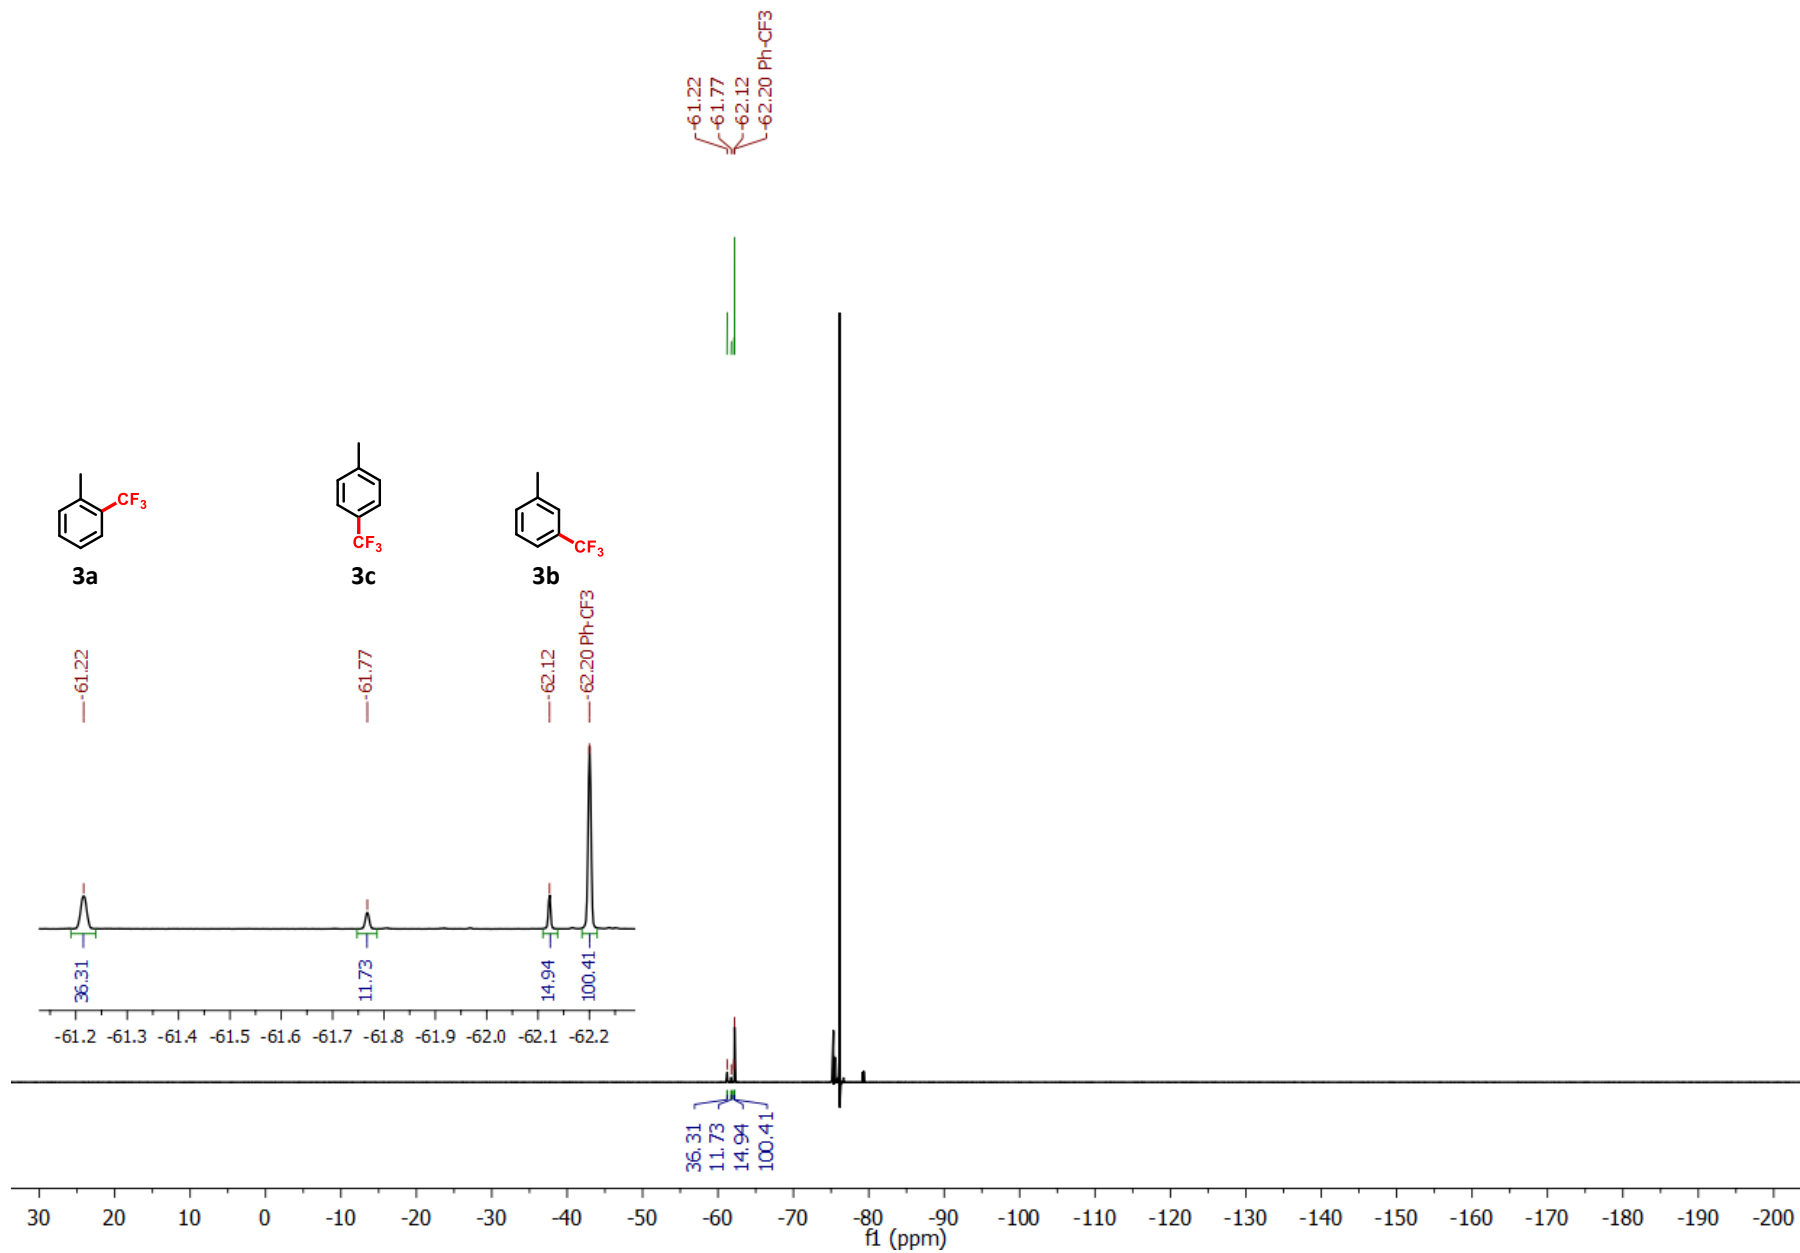

(4)  $^{19}\text{F}$  NMR (376 MHz,  $\text{DMSO-}d_6/\text{EtOAc}$ ) for trifluoromethylation of *tert*-butylbenzene

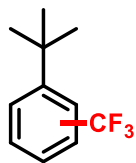

4

The mixture  
of isomers

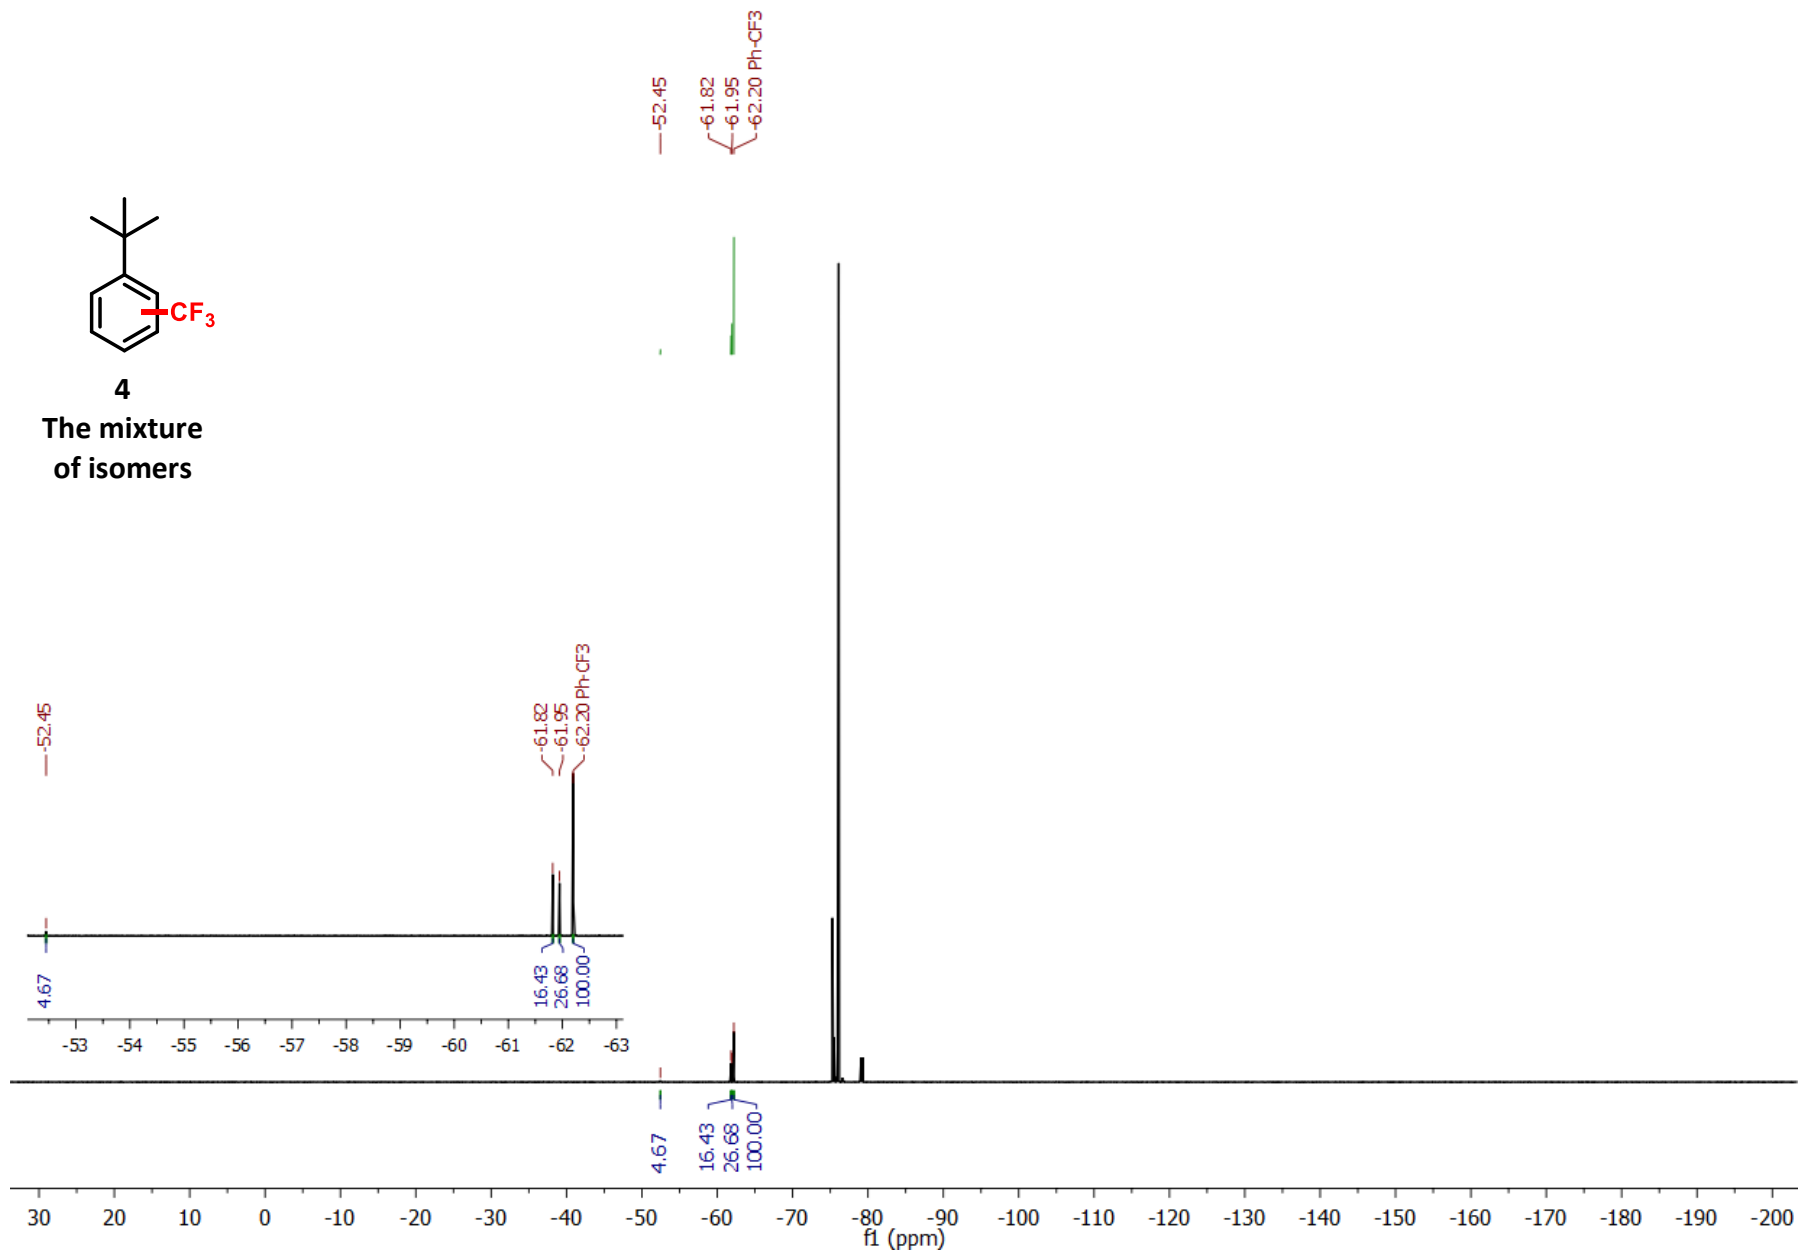

(5)  $^{19}\text{F}$  NMR (376 MHz,  $\text{DMSO-}d_6/\text{EtOAc}$ ) for trifluoromethylation of biphenyl

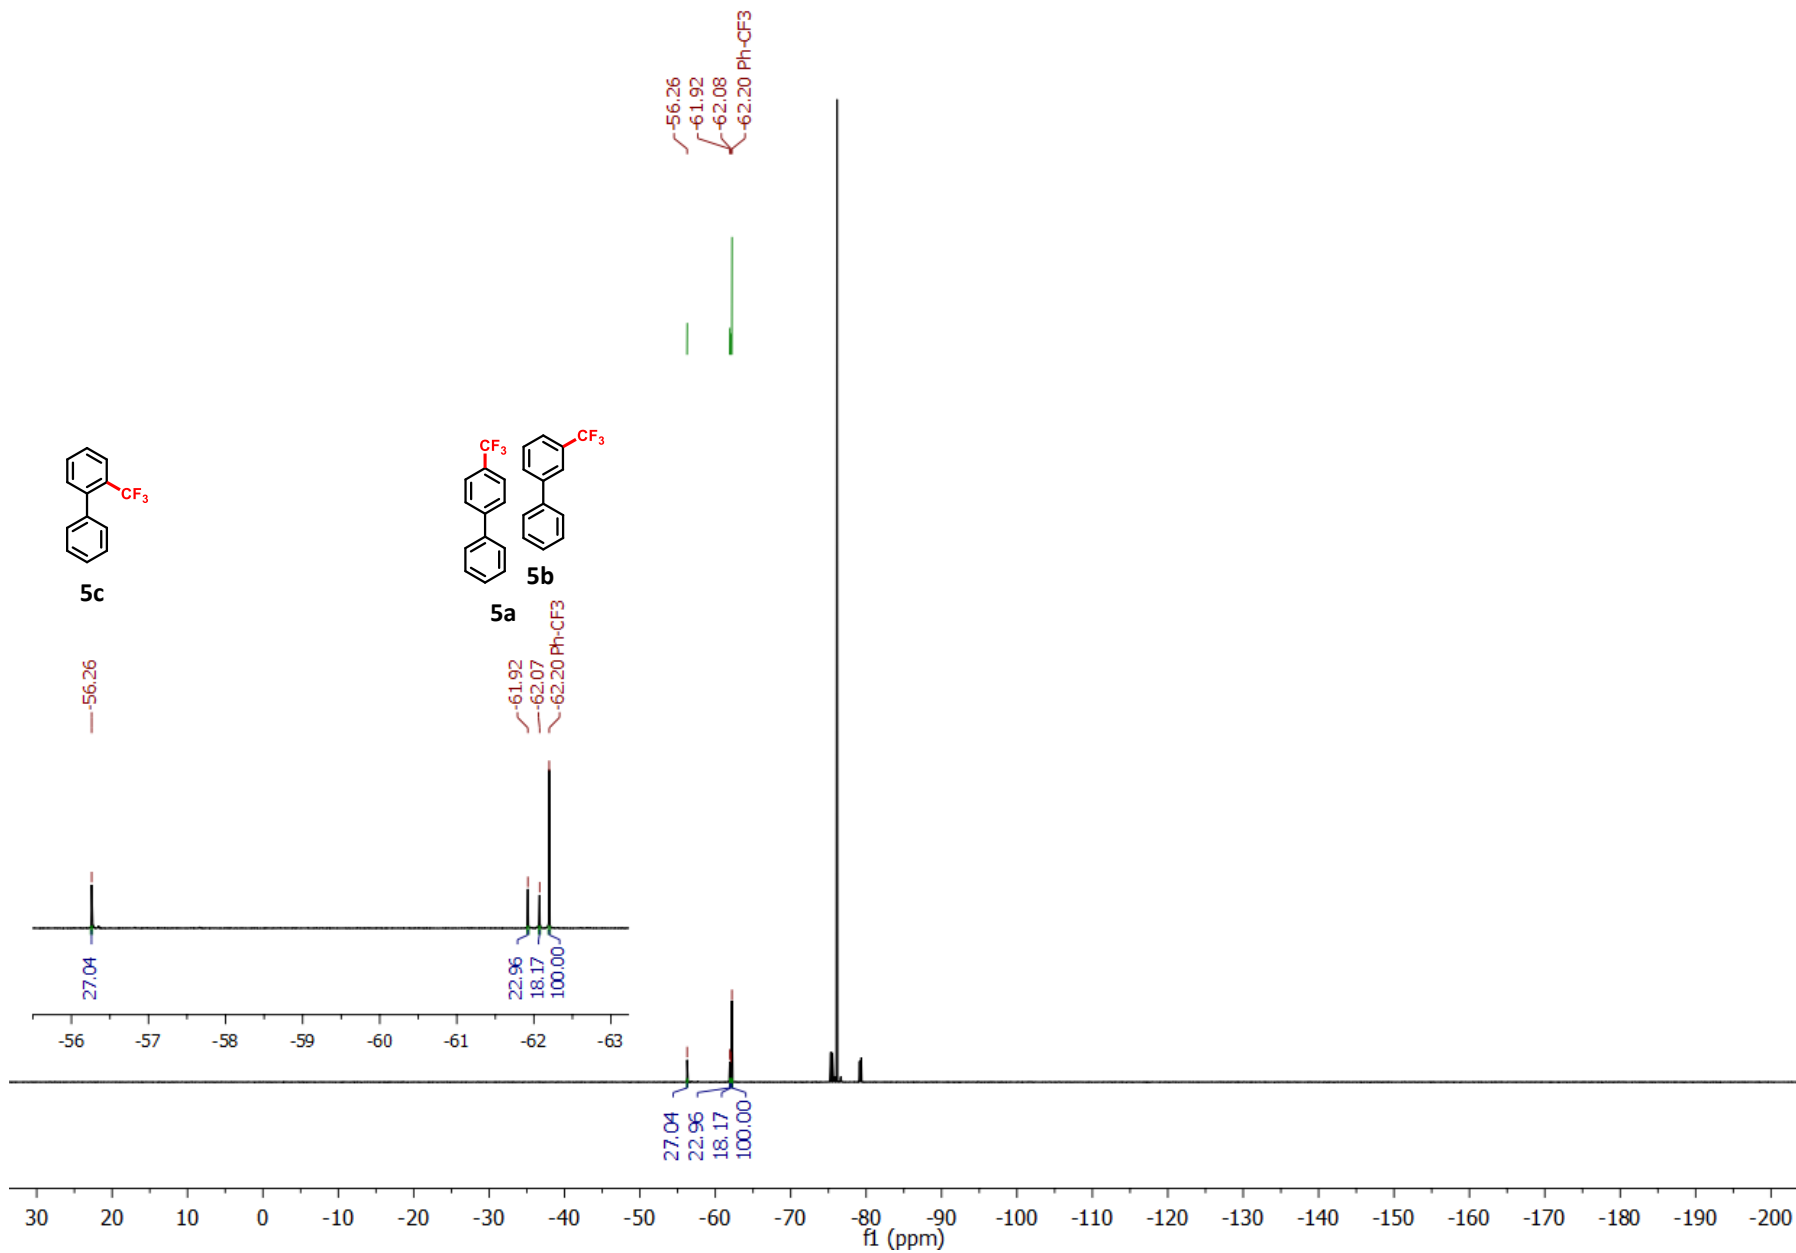

(6)  $^{19}\text{F}$  NMR (376 MHz,  $\text{DMSO-}d_6/\text{EtOAc}$ ) for trifluoromethylation of naphthalene

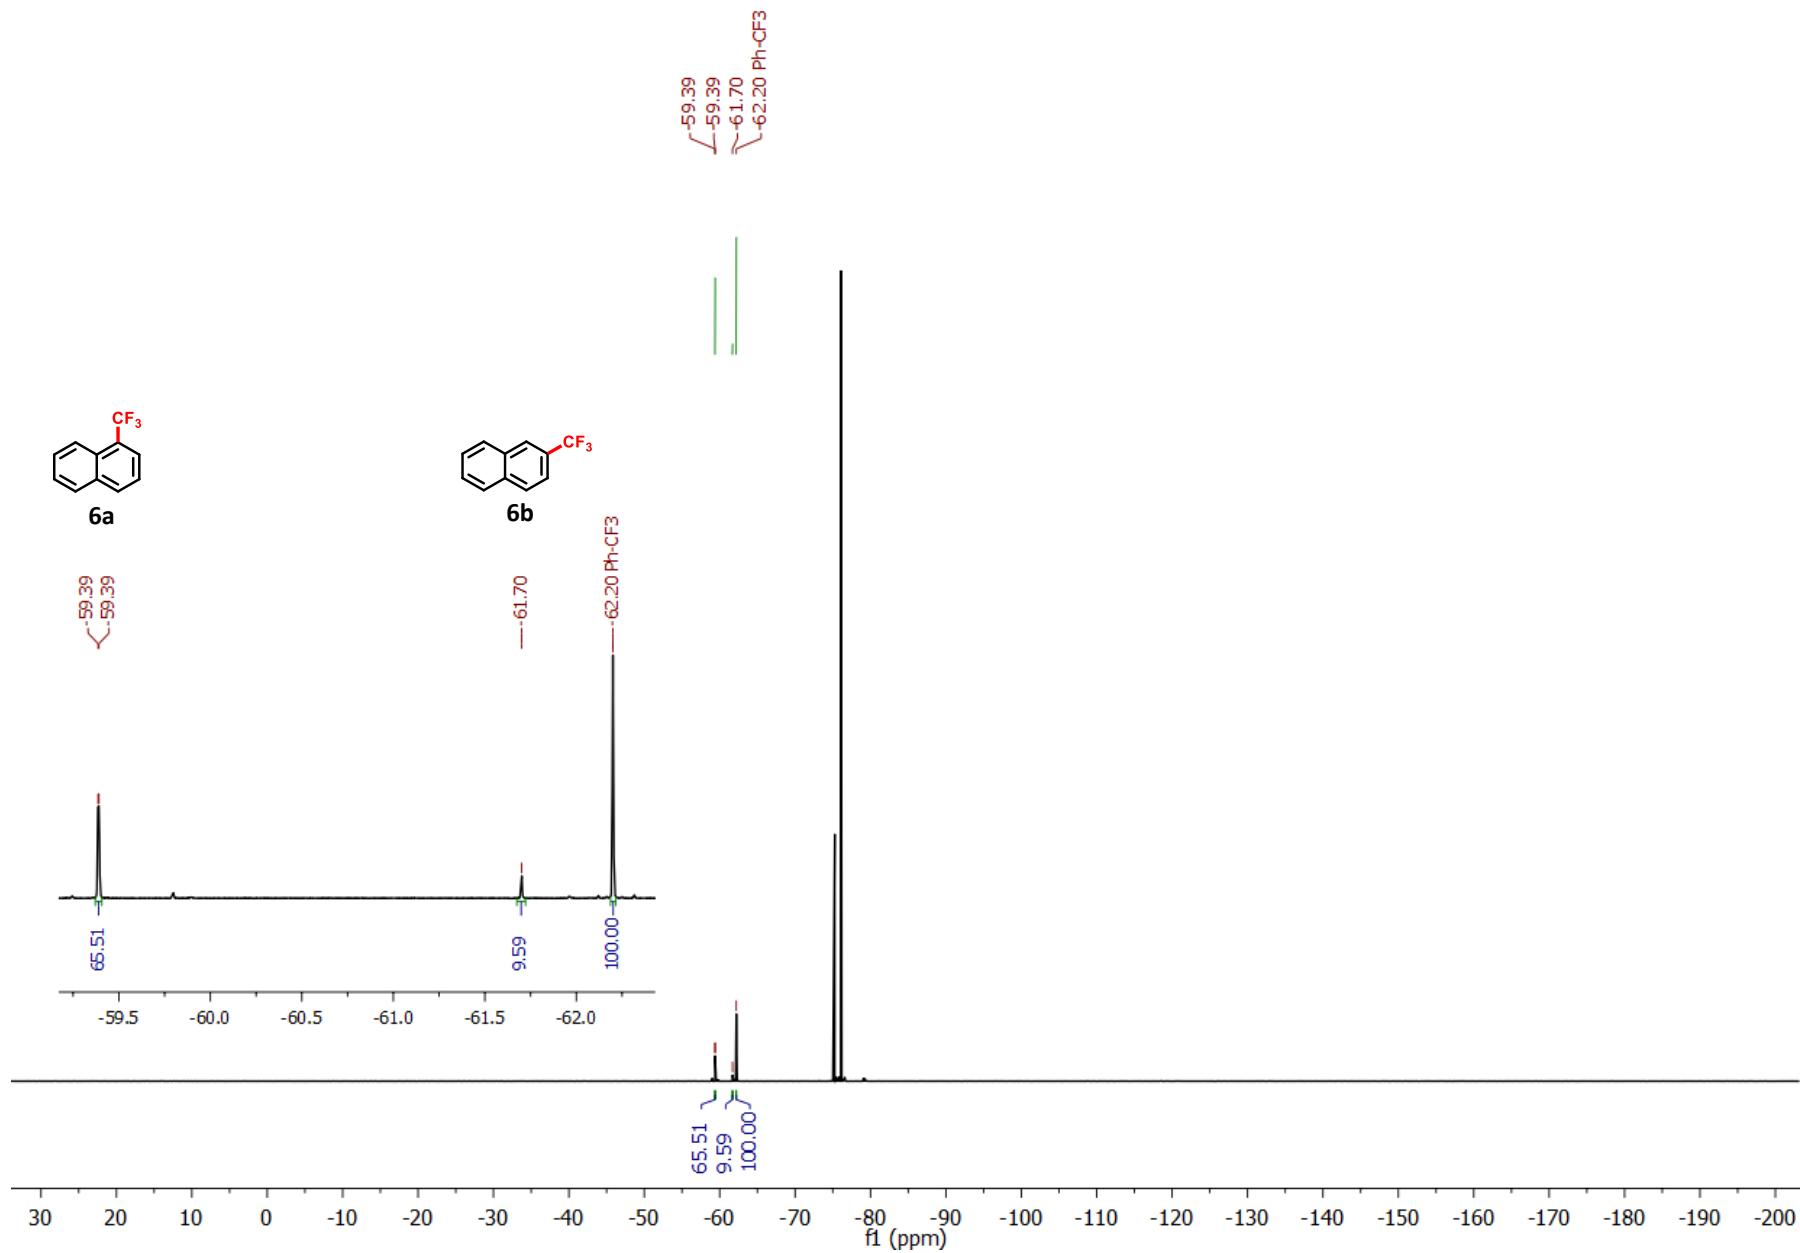

(7)  $^{19}\text{F}$  NMR (376 MHz,  $\text{DMSO-}d_6/\text{EtOAc}$ ) for trifluoromethylation of 1,2-dimethylbenzene (*o*-xylene)

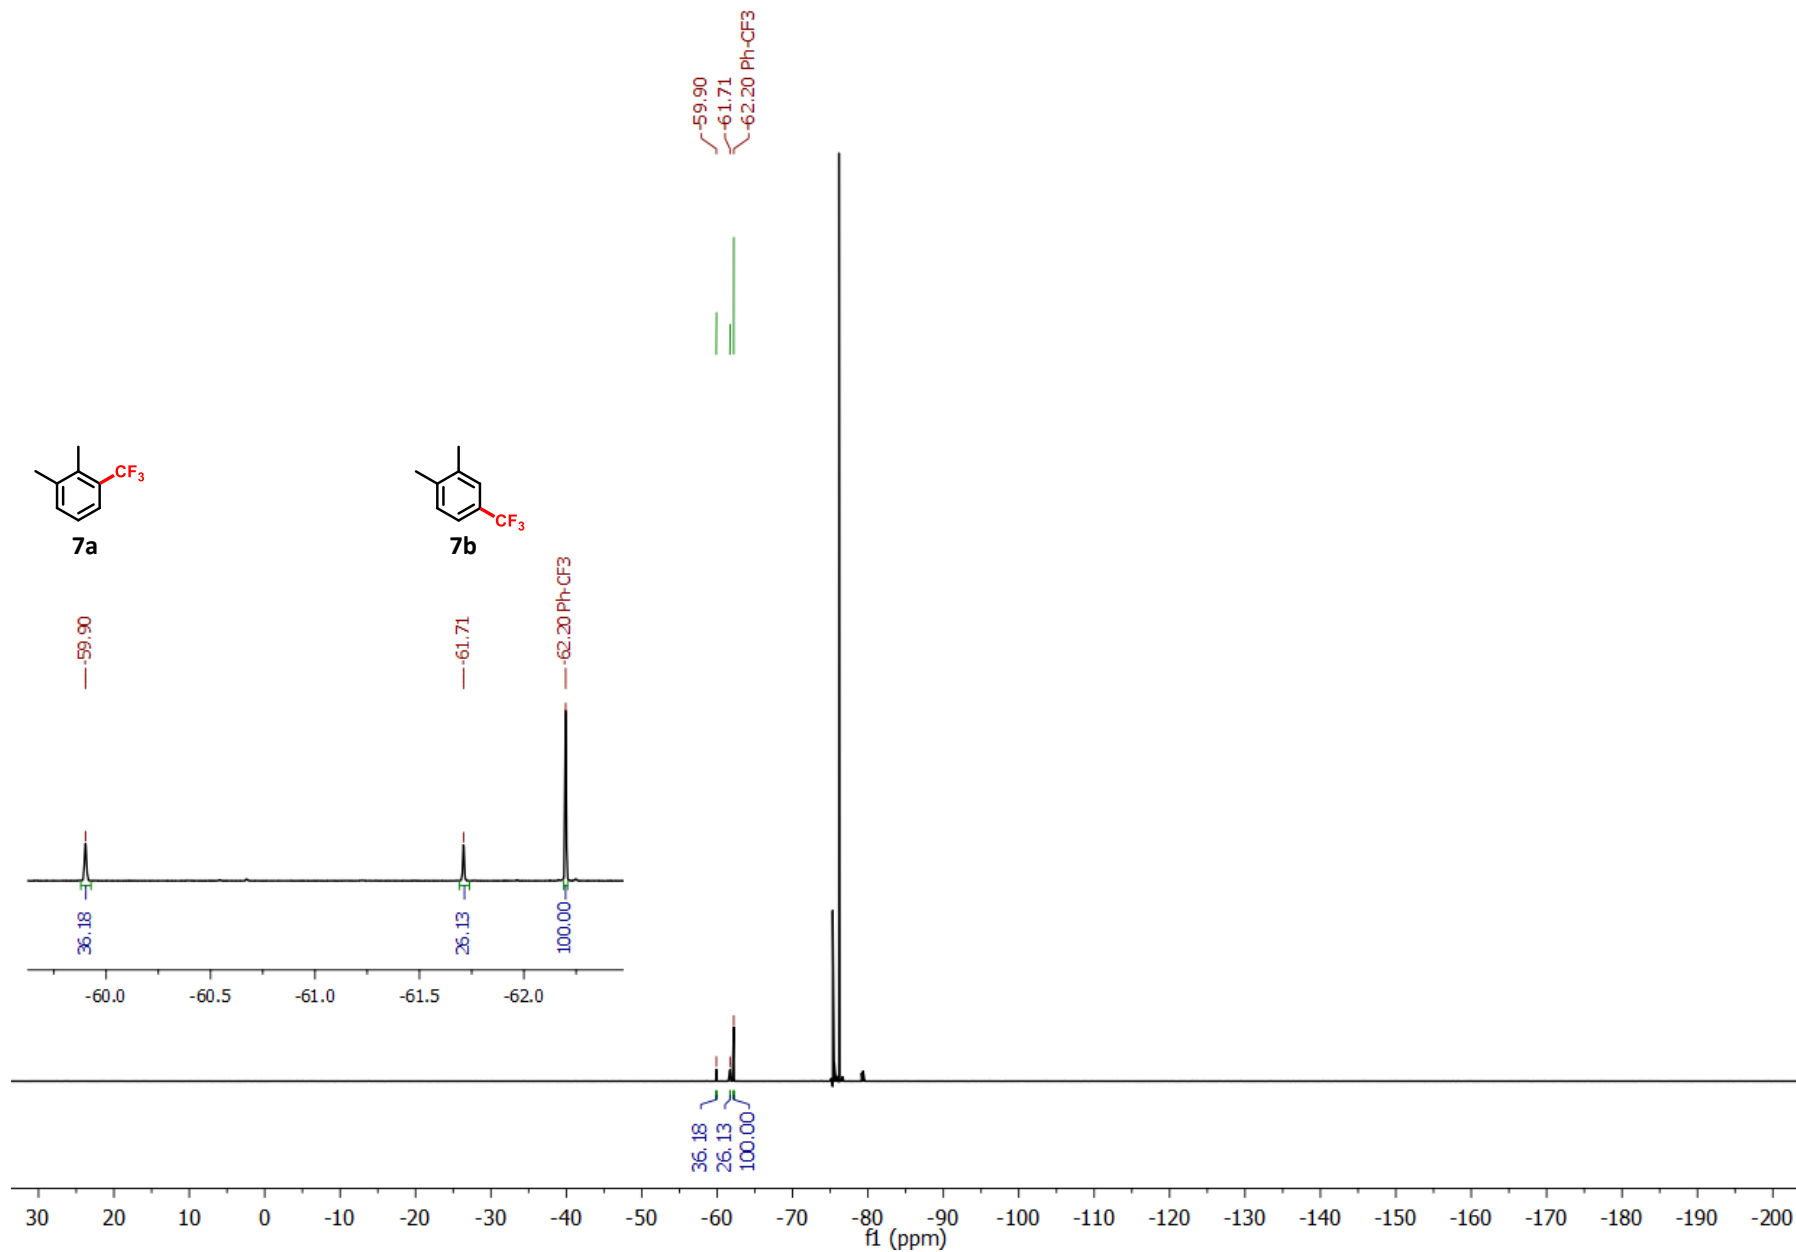

(8)  $^{19}\text{F}$  NMR (376 MHz,  $\text{DMSO-}d_6/\text{EtOAc}$ ) for trifluoromethylation of 1,2,4,5-tetramethylbenzene (durene)

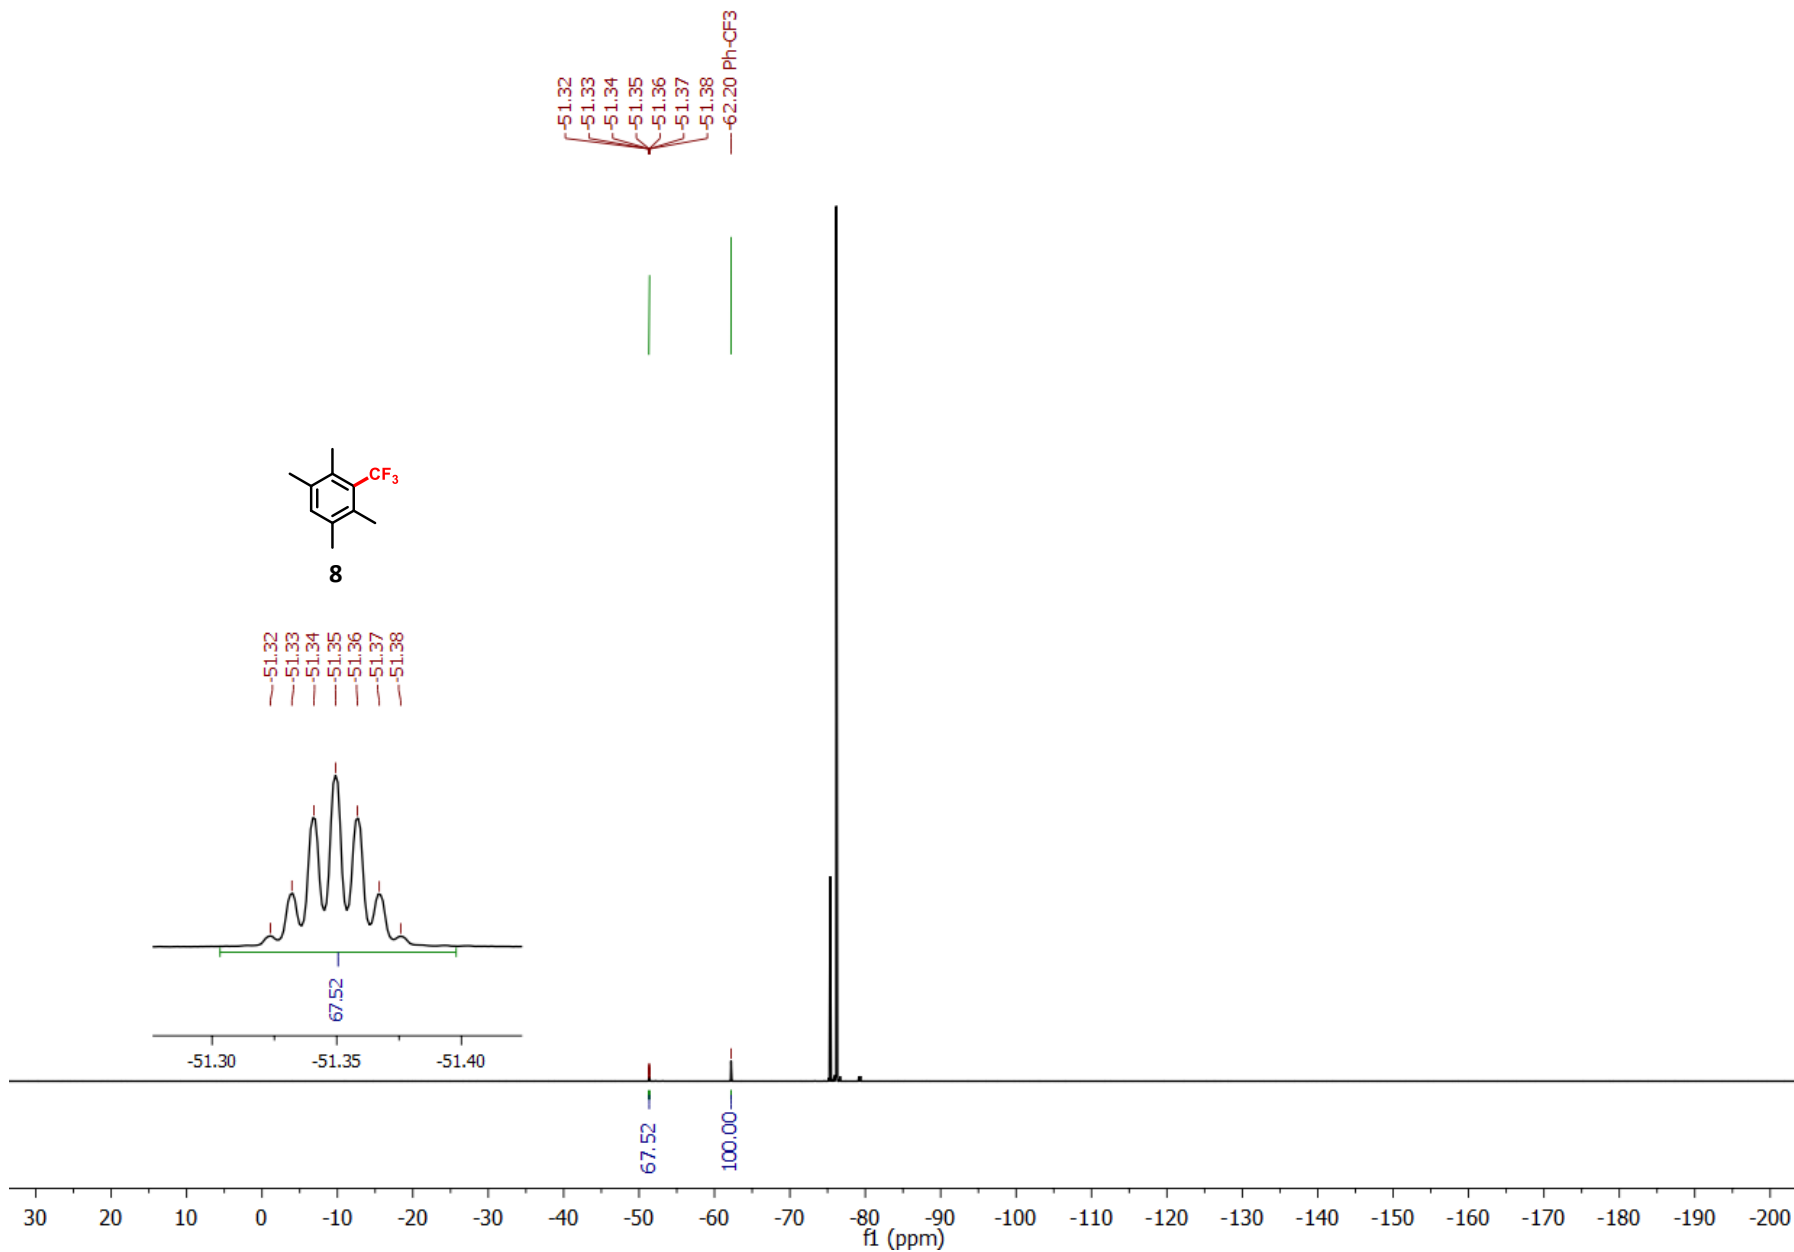

(9)  $^{19}\text{F}$  NMR (376 MHz,  $\text{CDCl}_3/\text{EtOAc}$ ) for trifluoromethylation of 1,3,5-trimethylbenzene (mesitylene)

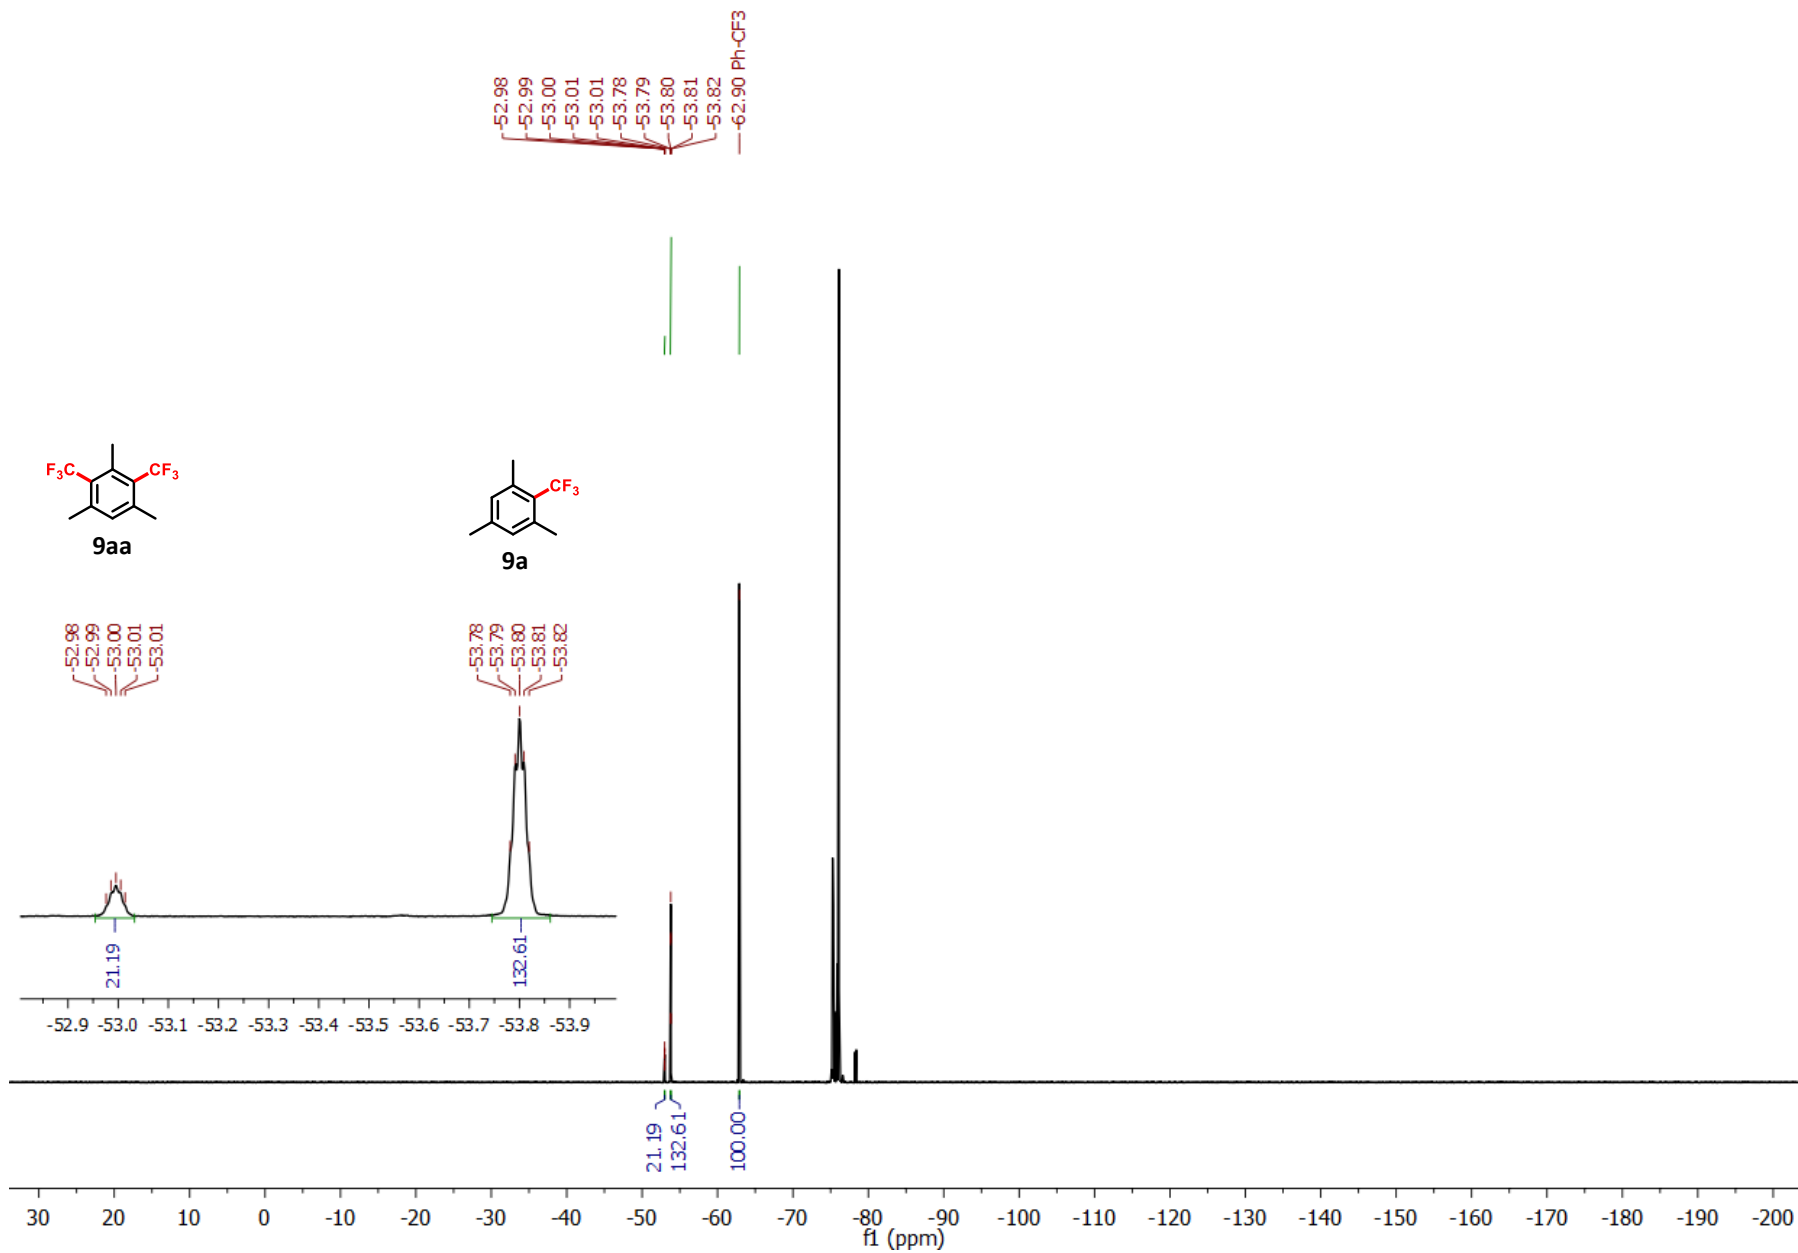



(11)  $^{19}\text{F}$  NMR (376 MHz,  $\text{CDCl}_3/\text{EtOAc}$ ) for trifluoromethylation of methoxybenzene (anisole)

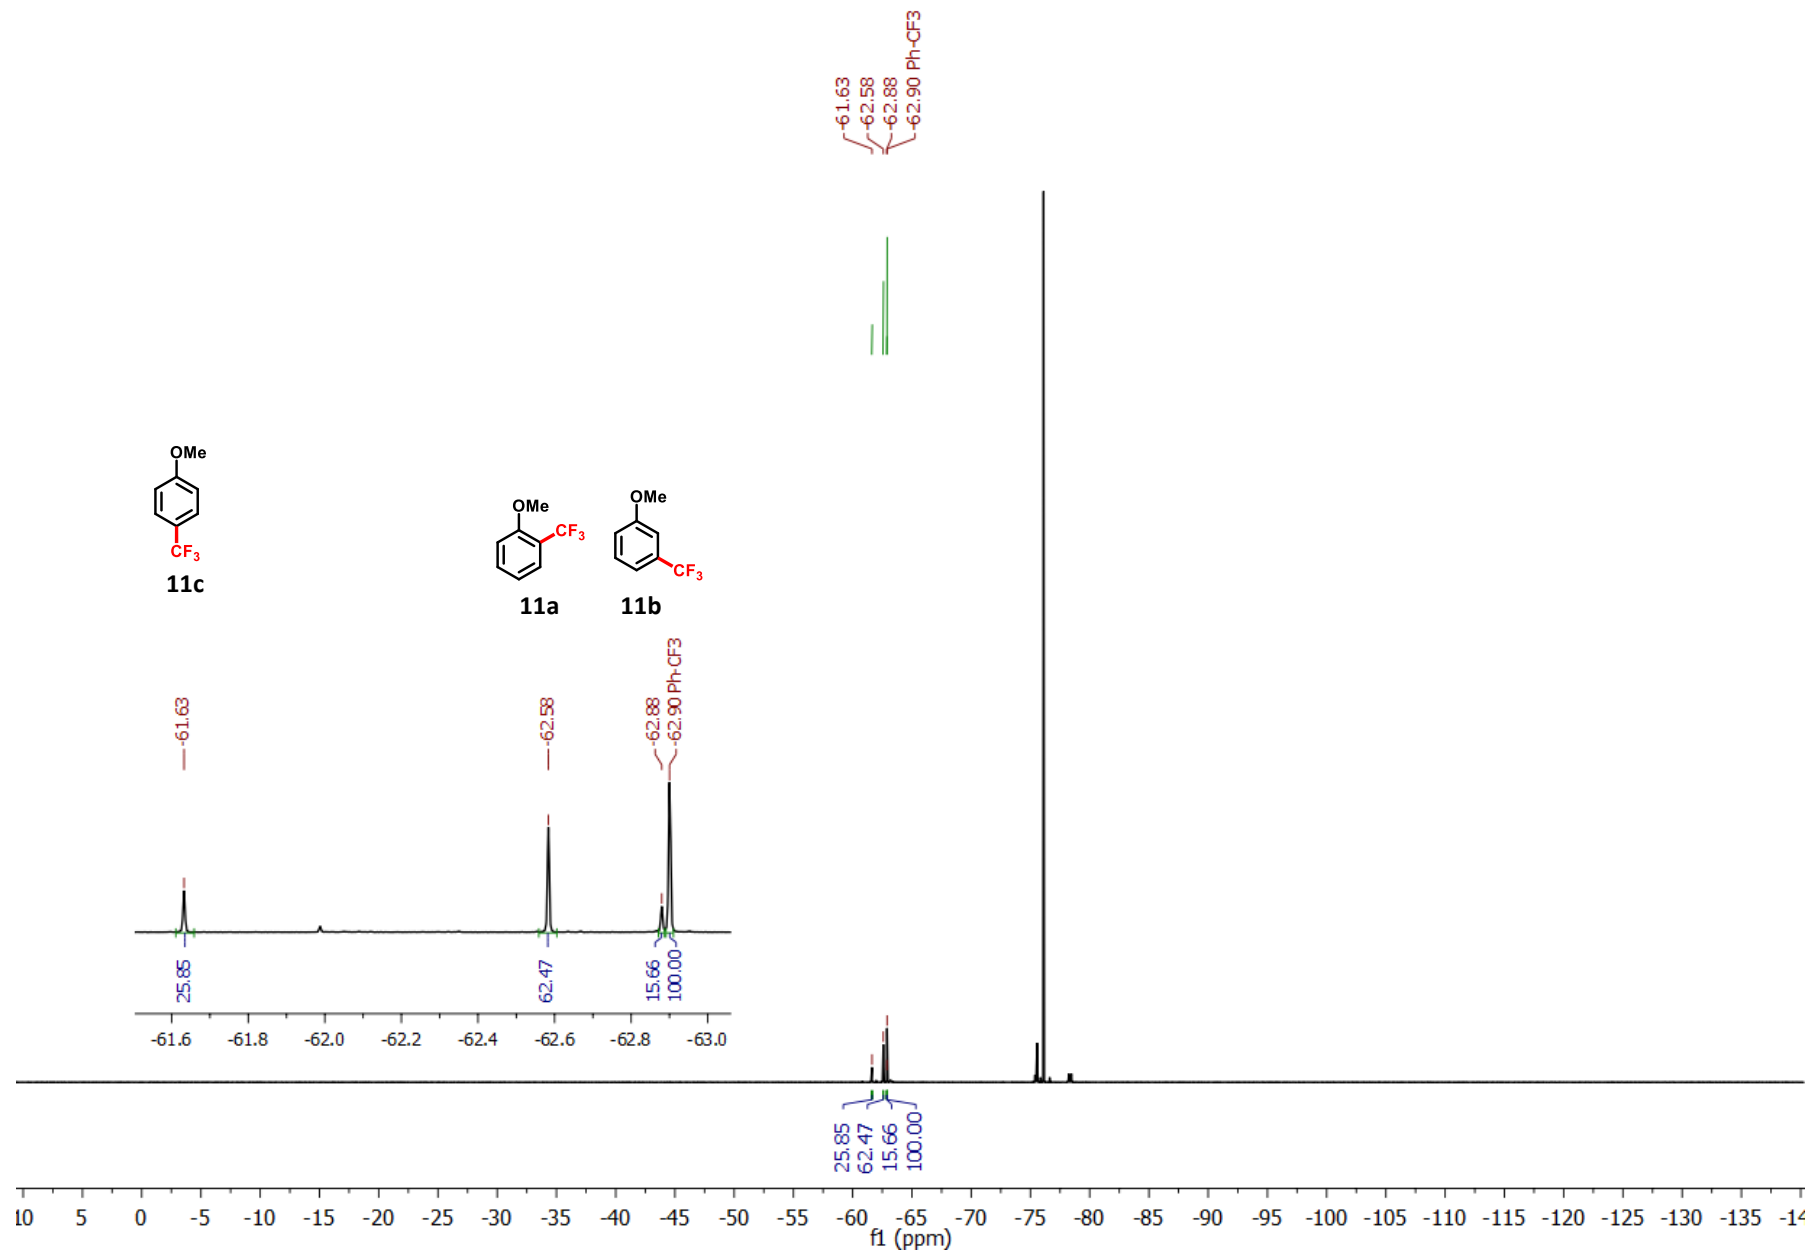

(12)  $^{19}\text{F}$  NMR (376 MHz,  $\text{CDCl}_3/\text{EtOAc}$ ) for trifluoromethylation of thioanisole

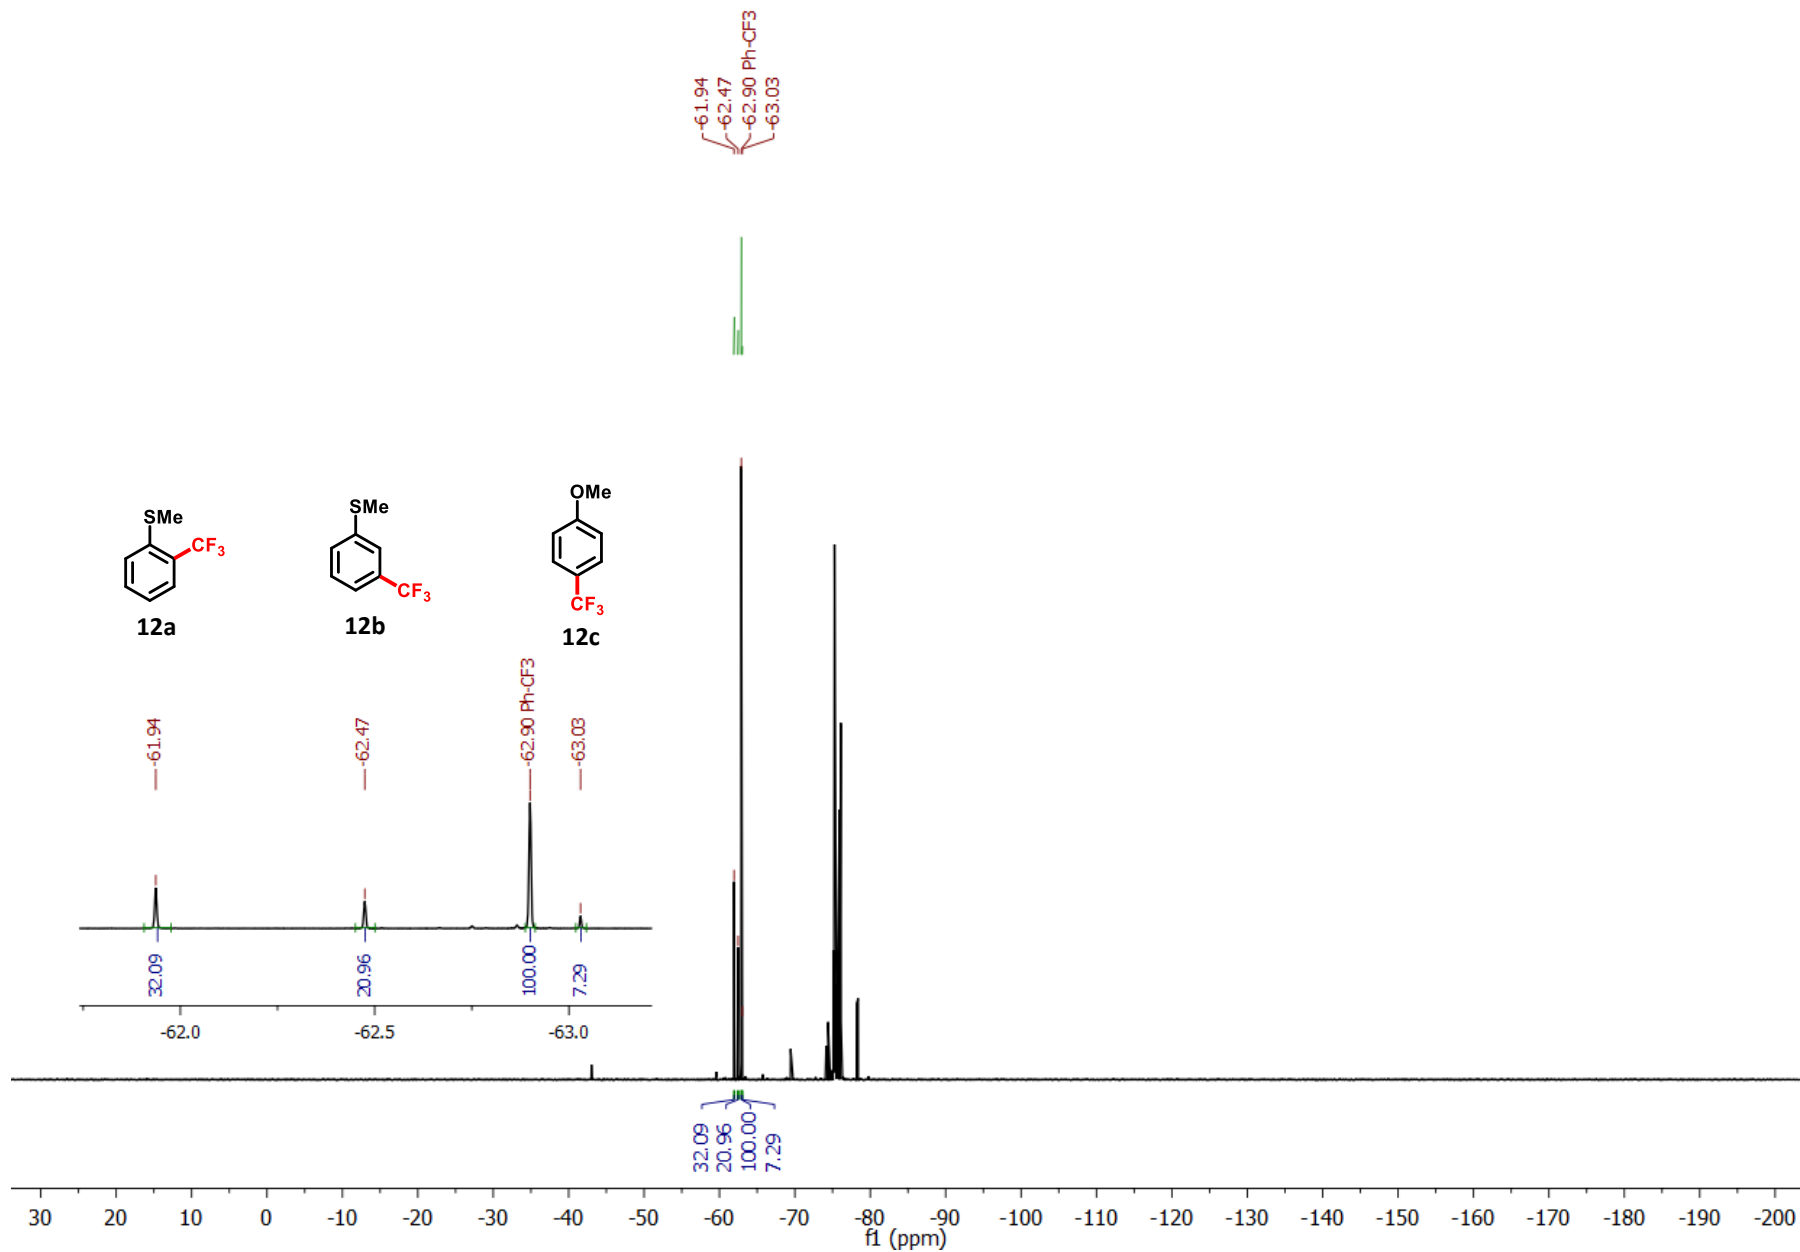

(13)  $^{19}\text{F}$  NMR (376 MHz,  $\text{DMSO-}d_6/\text{EtOAc}$ ) for trifluoromethylation of 1-methoxy-3-methylbenzene

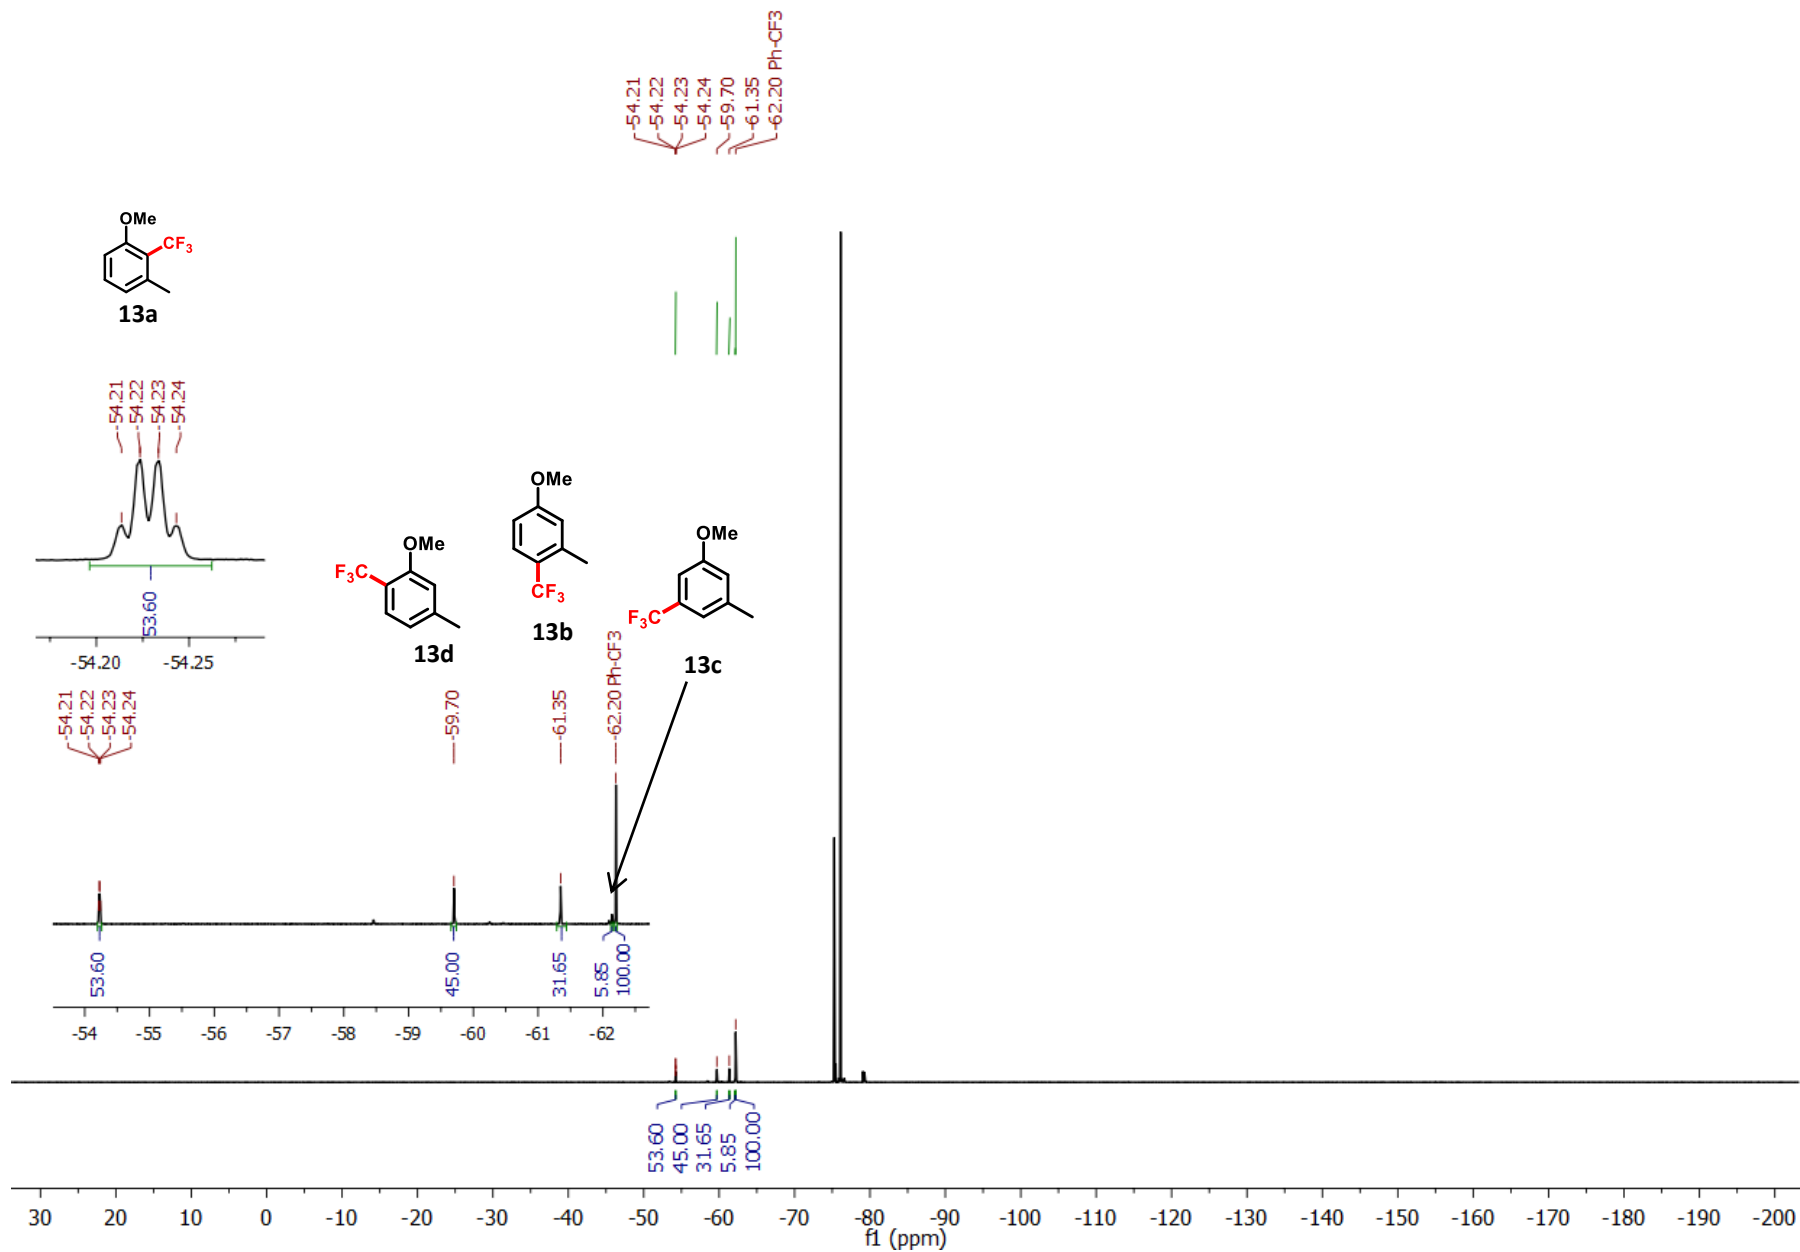

(14)  $^{19}\text{F}$  NMR (376 MHz,  $\text{DMSO-}d_6/\text{EtOAc}$ ) for trifluoromethylation of 1-methoxy-4-methylbenzene (4-methylanisole)

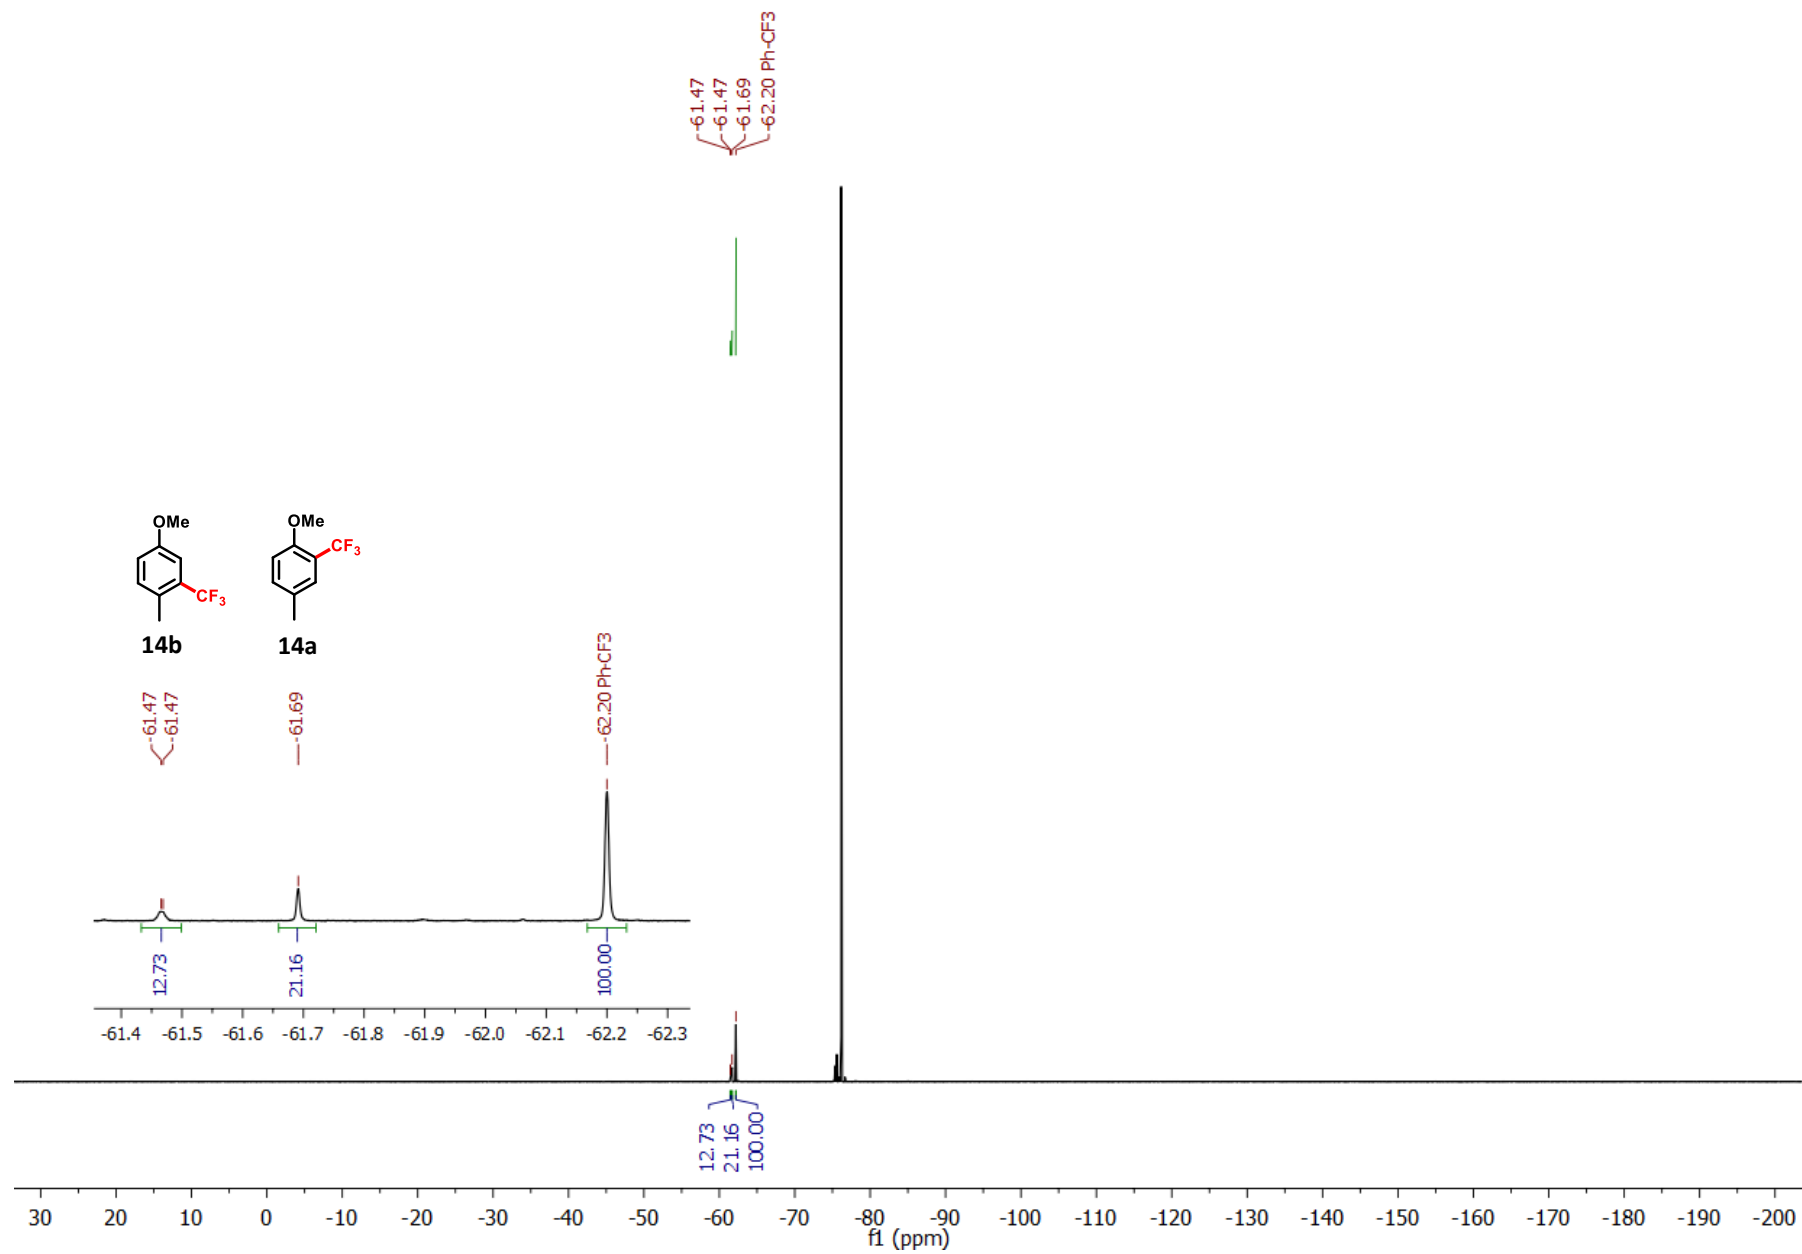

(15)  $^{19}\text{F}$  NMR (376 MHz,  $\text{DMSO-}d_6/\text{EtOAc}$ ) for trifluoromethylation of 3,4-dimethylanisole

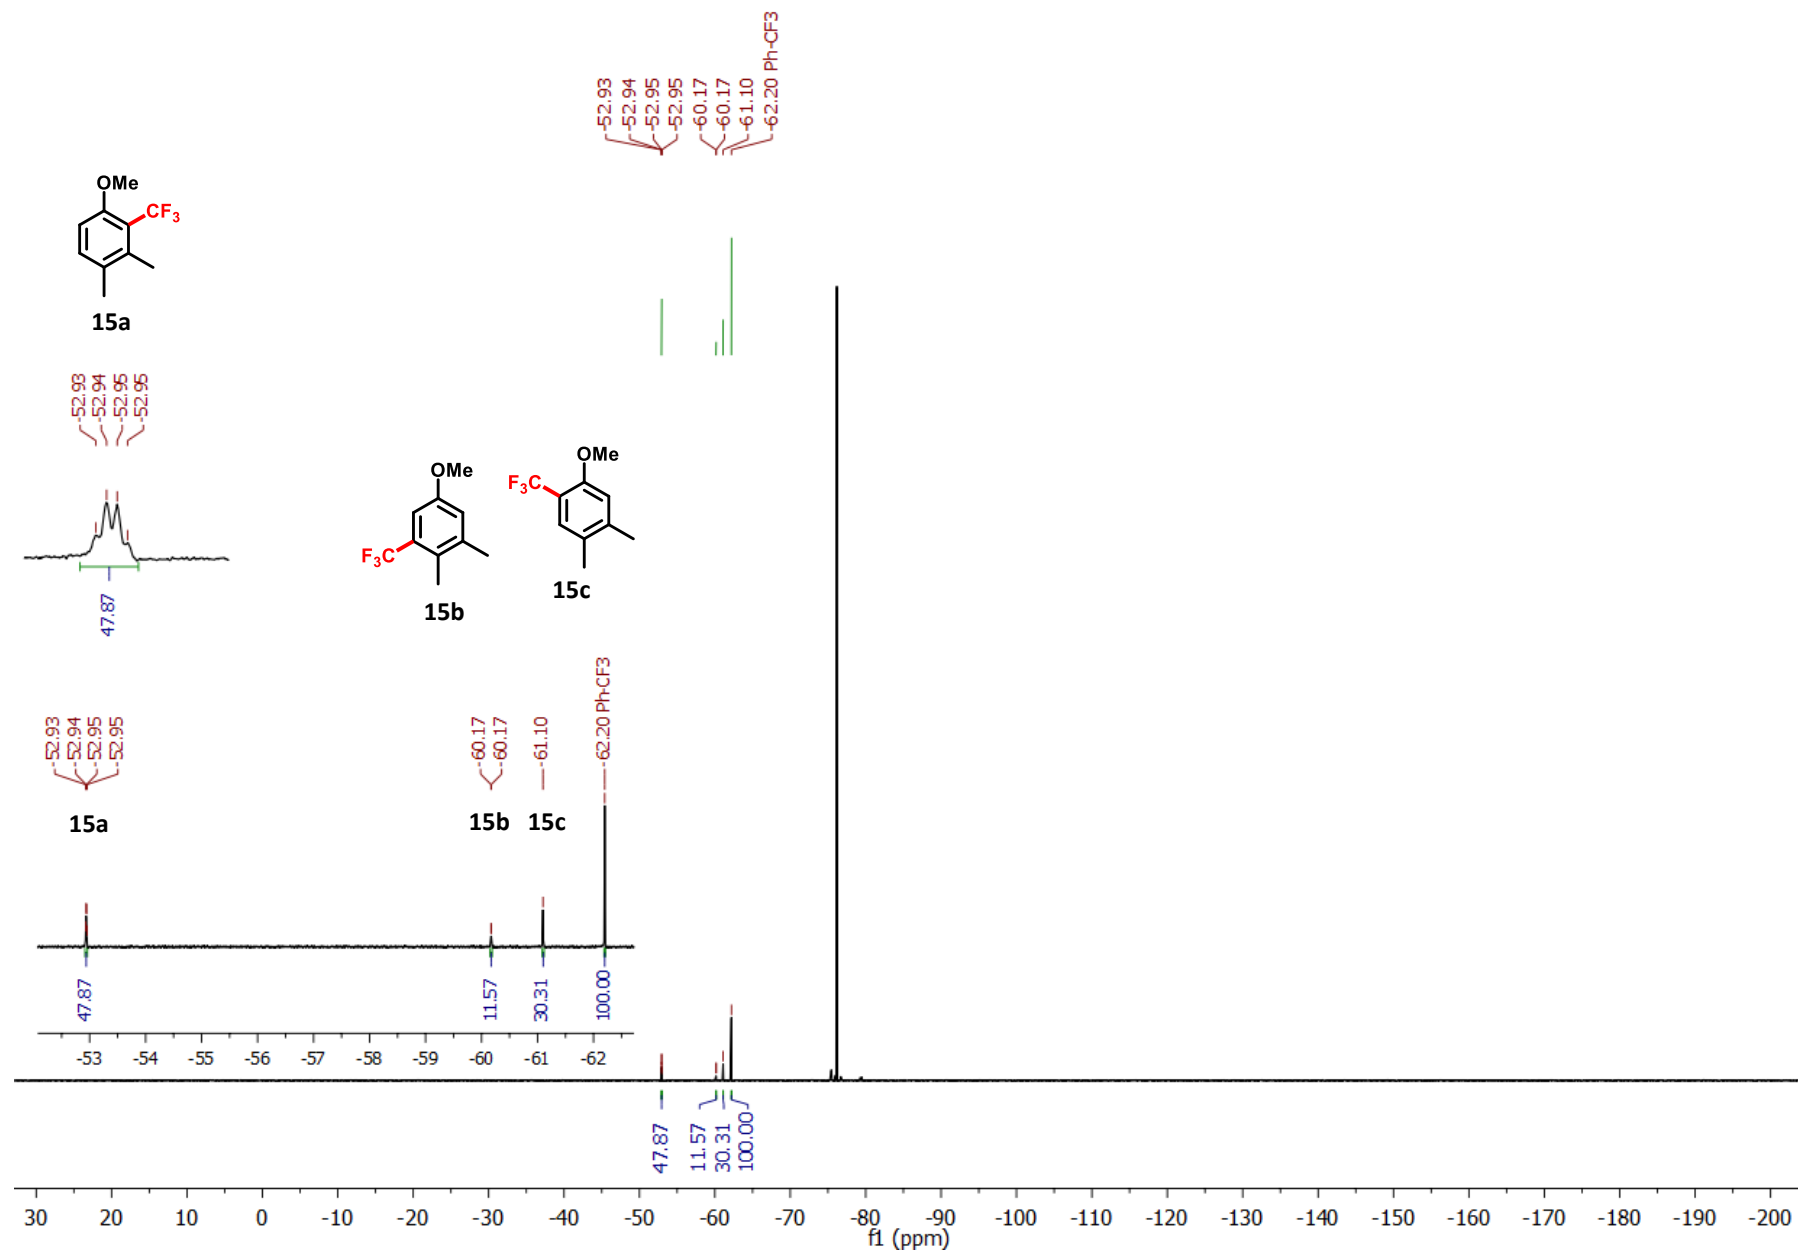

(16)  $^{19}\text{F}$  NMR (376 MHz,  $\text{DMSO-}d_6/\text{EtOAc}$ ) for trifluoromethylation of 1-isopropyl-2-methoxy-4-methylbenzene

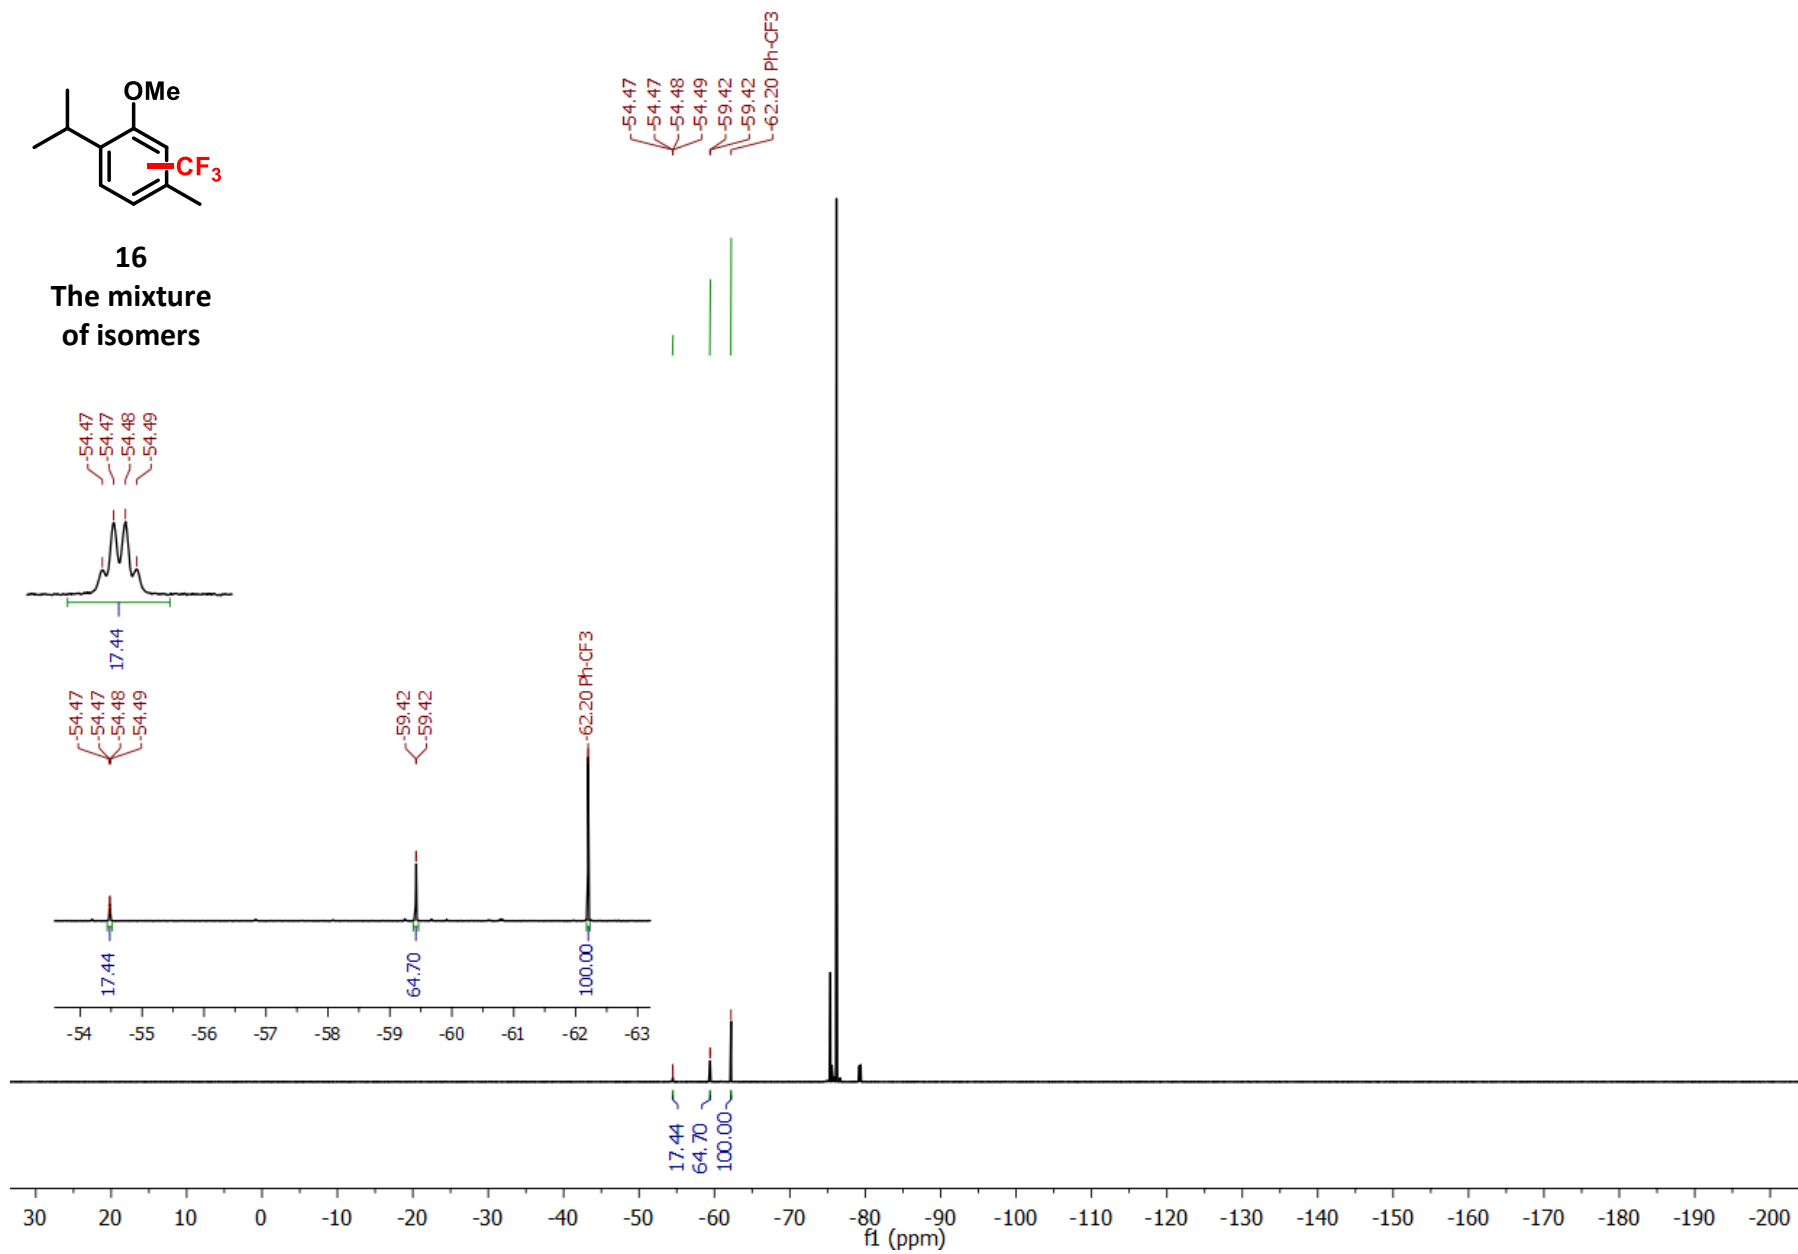

(17)  $^{19}\text{F}$  NMR (376 MHz,  $\text{CDCl}_3/\text{EtOAc}$ ) for trifluoromethylation of 1-methoxy-3,5-dimethylbenzene

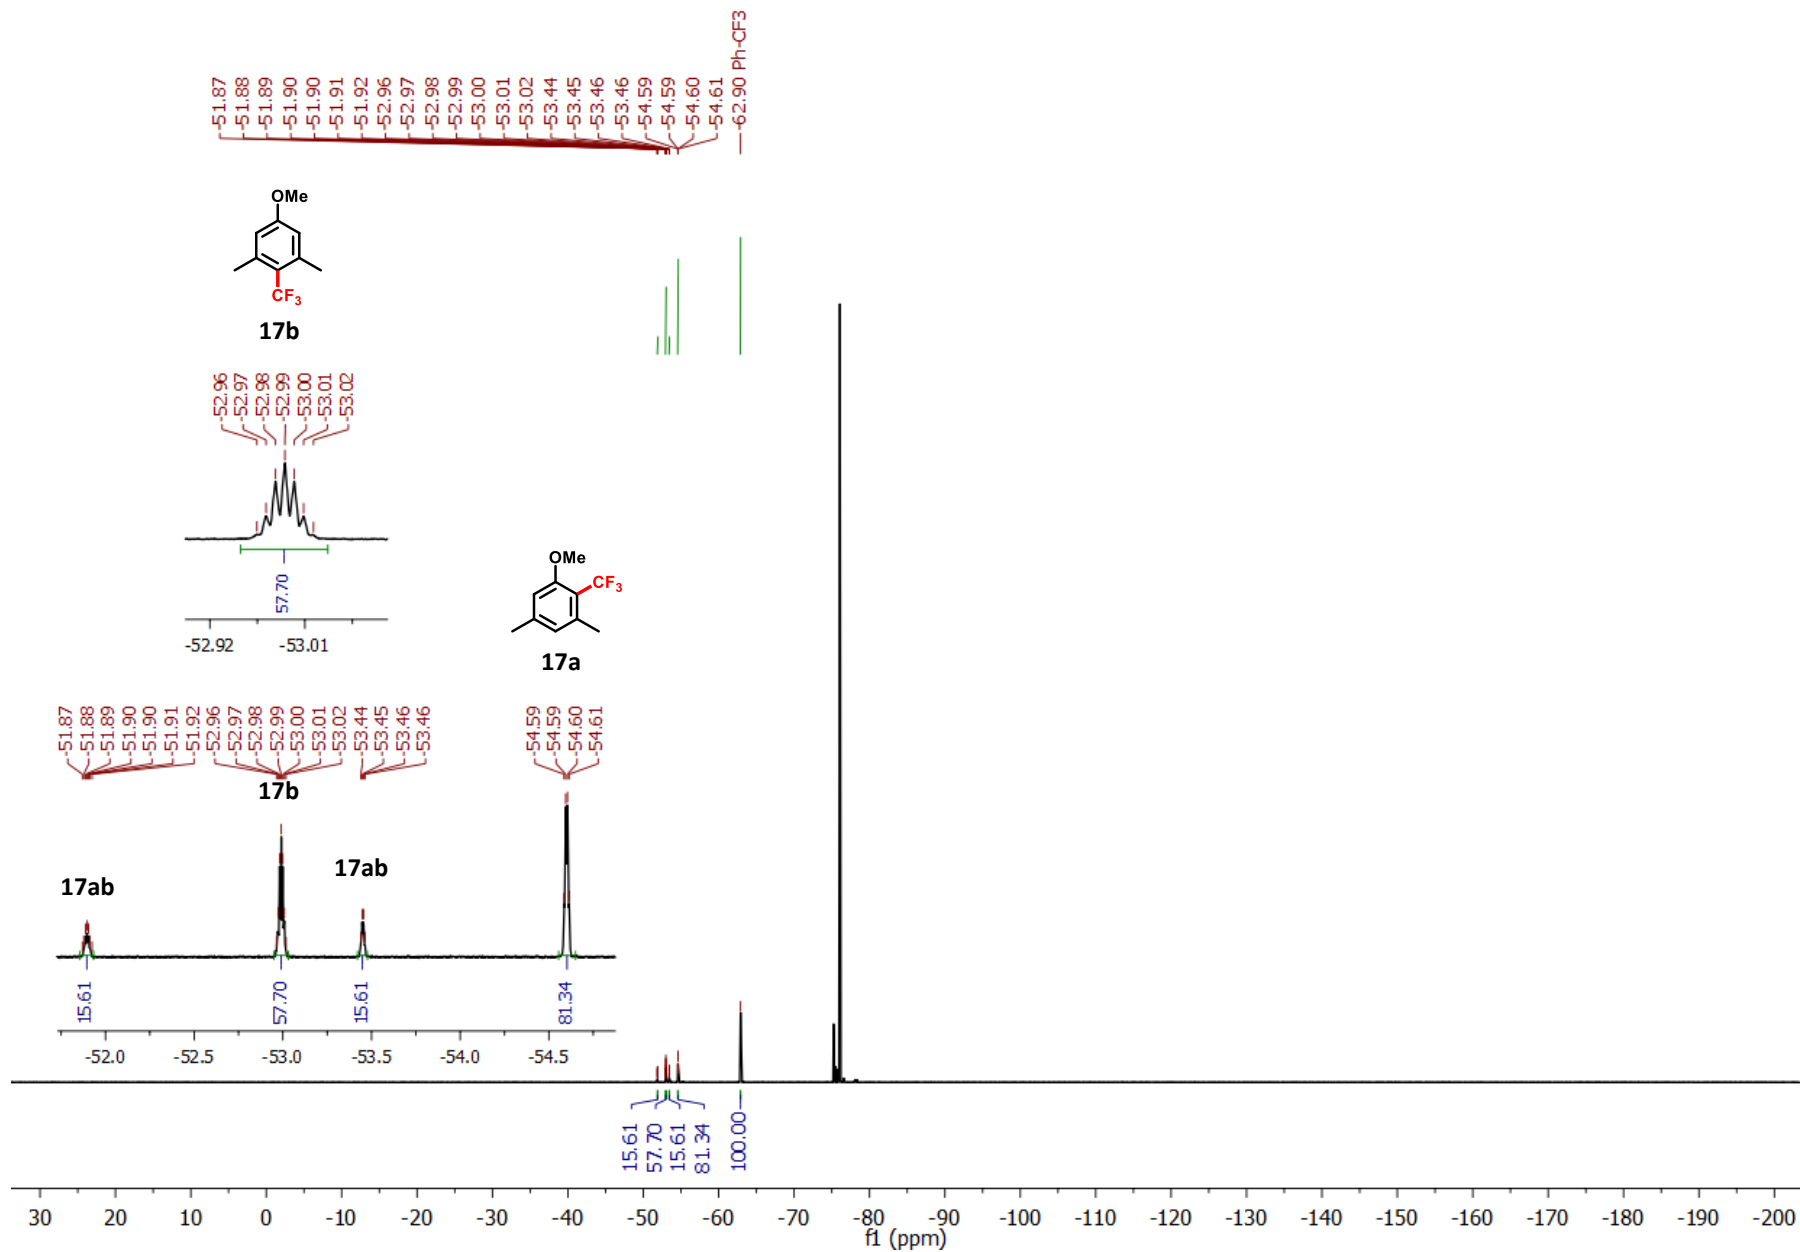

(18)  $^{19}\text{F}$  NMR (376 MHz, DMSO- $d_6$ /EtOAc) for trifluoromethylation of 1-methoxy-2,3,5-trimethylbenzene

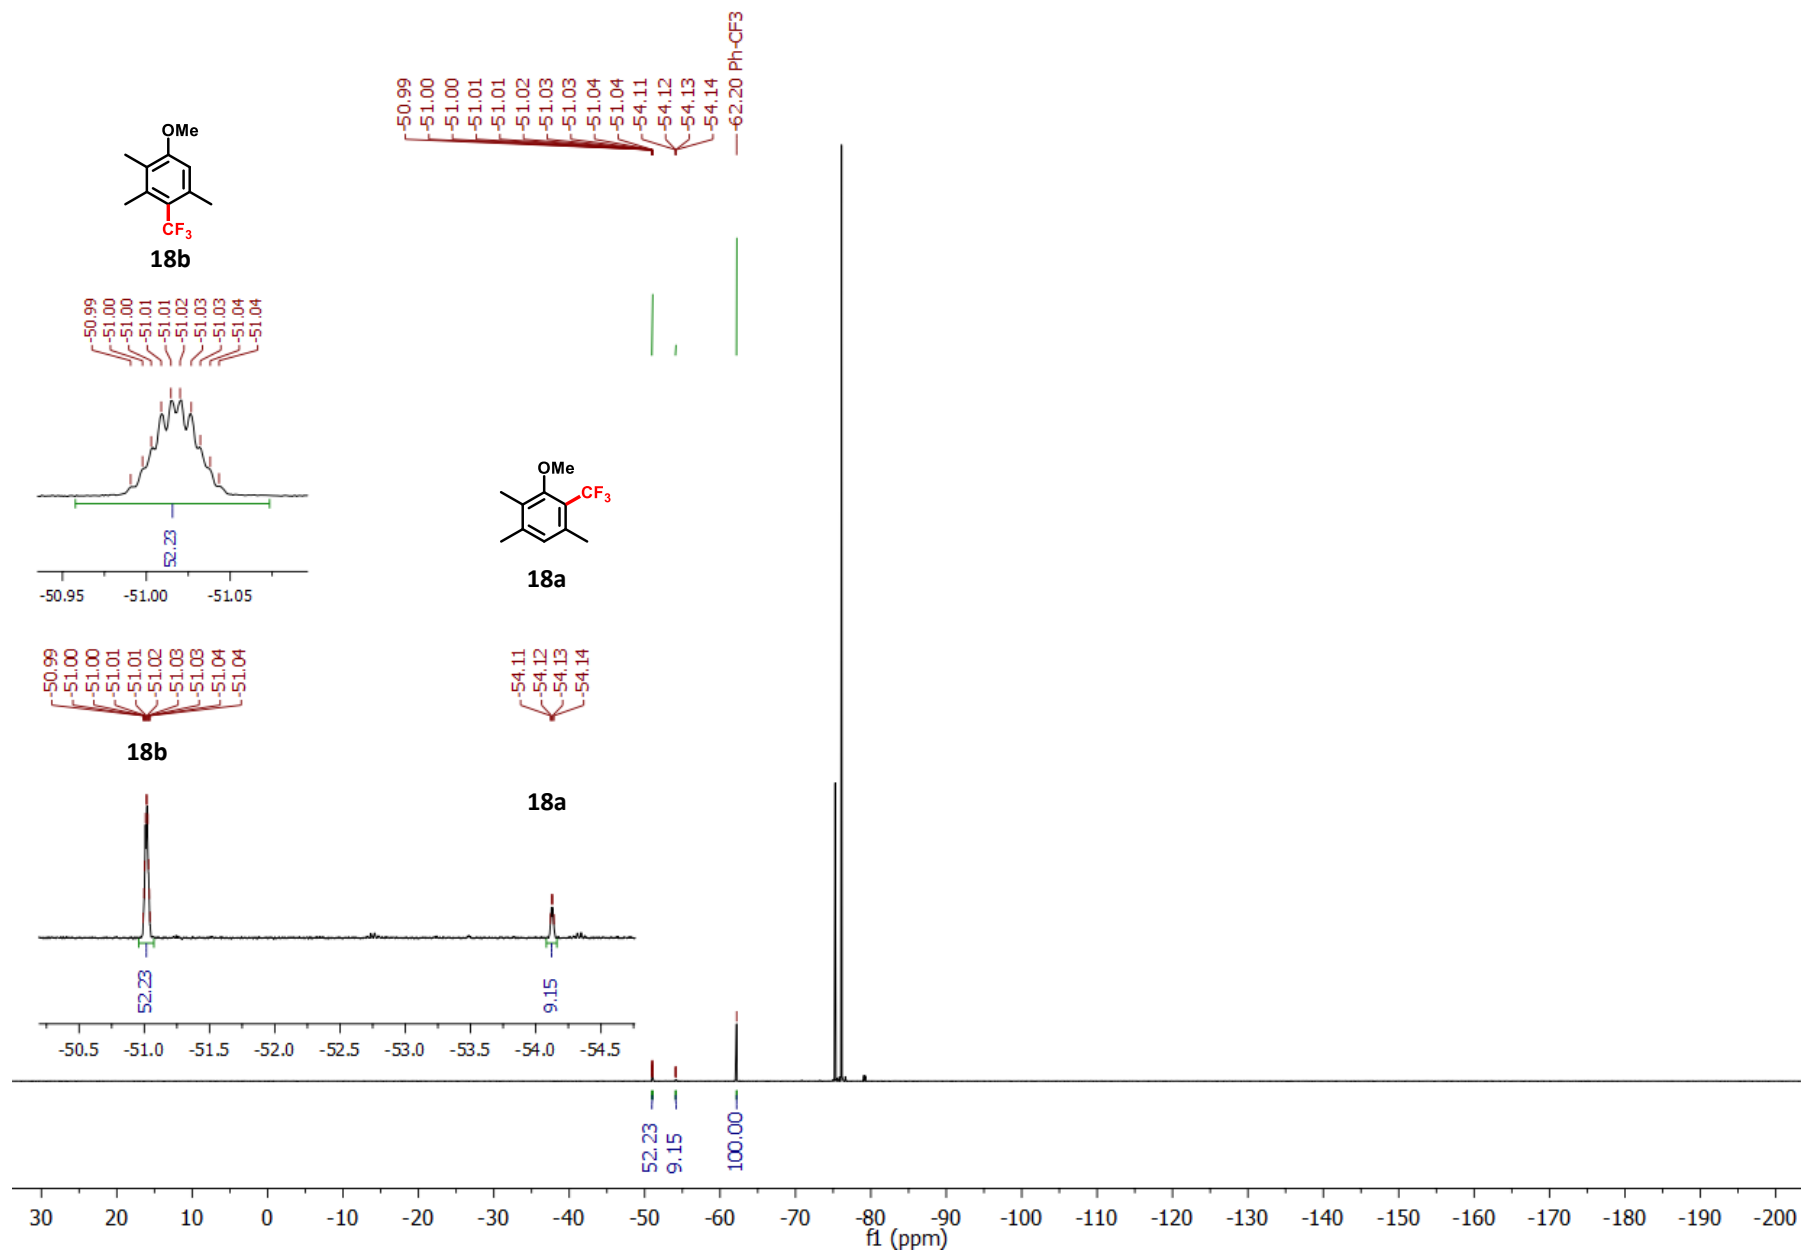

(19)  $^{19}\text{F}$  NMR (376 MHz,  $\text{DMSO-}d_6/\text{EtOAc}$ ) for trifluoromethylation of 1,2-dimethoxybenzene

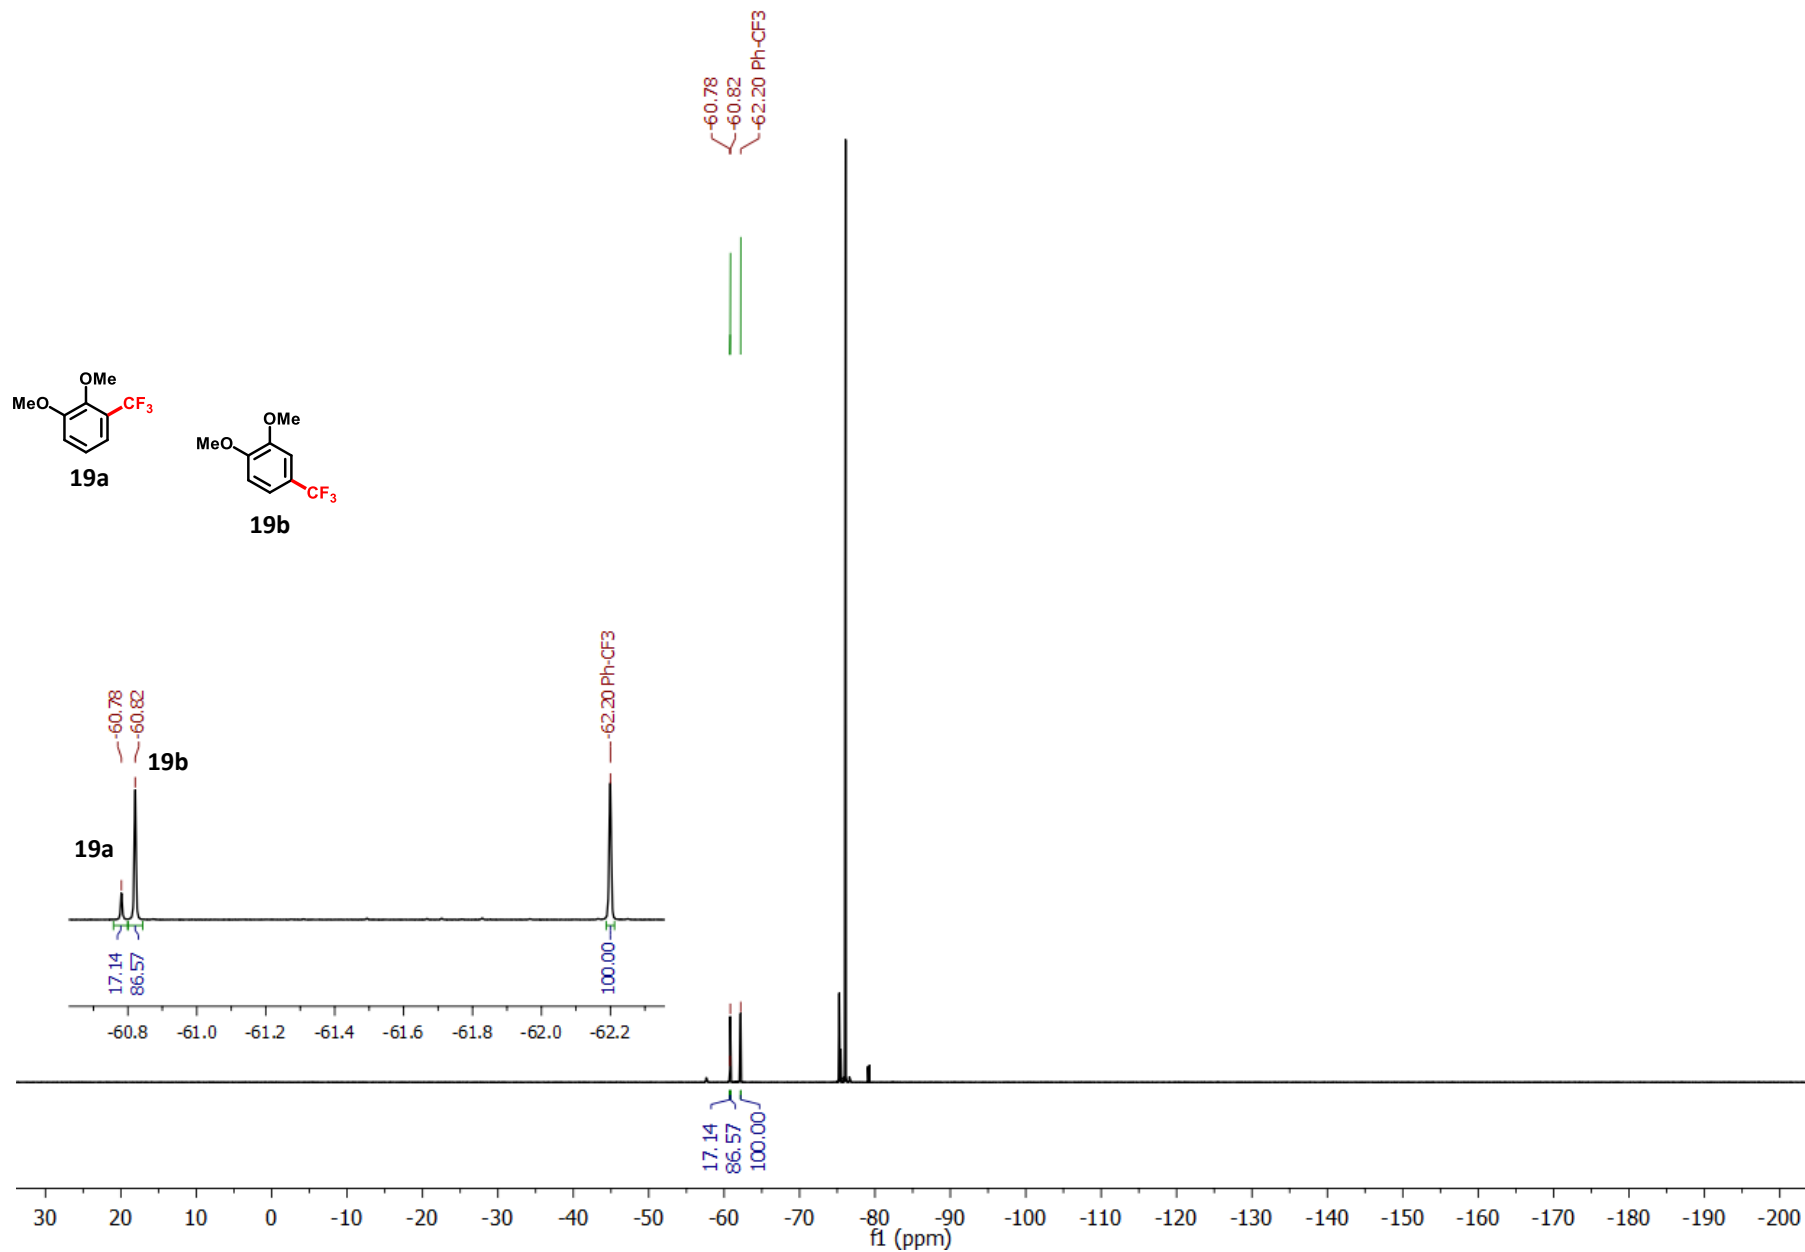

(20)  $^{19}\text{F}$  NMR (376 MHz,  $\text{DMSO-}d_6/\text{EtOAc}$ ) for trifluoromethylation of 1,3-dimethoxybenzene

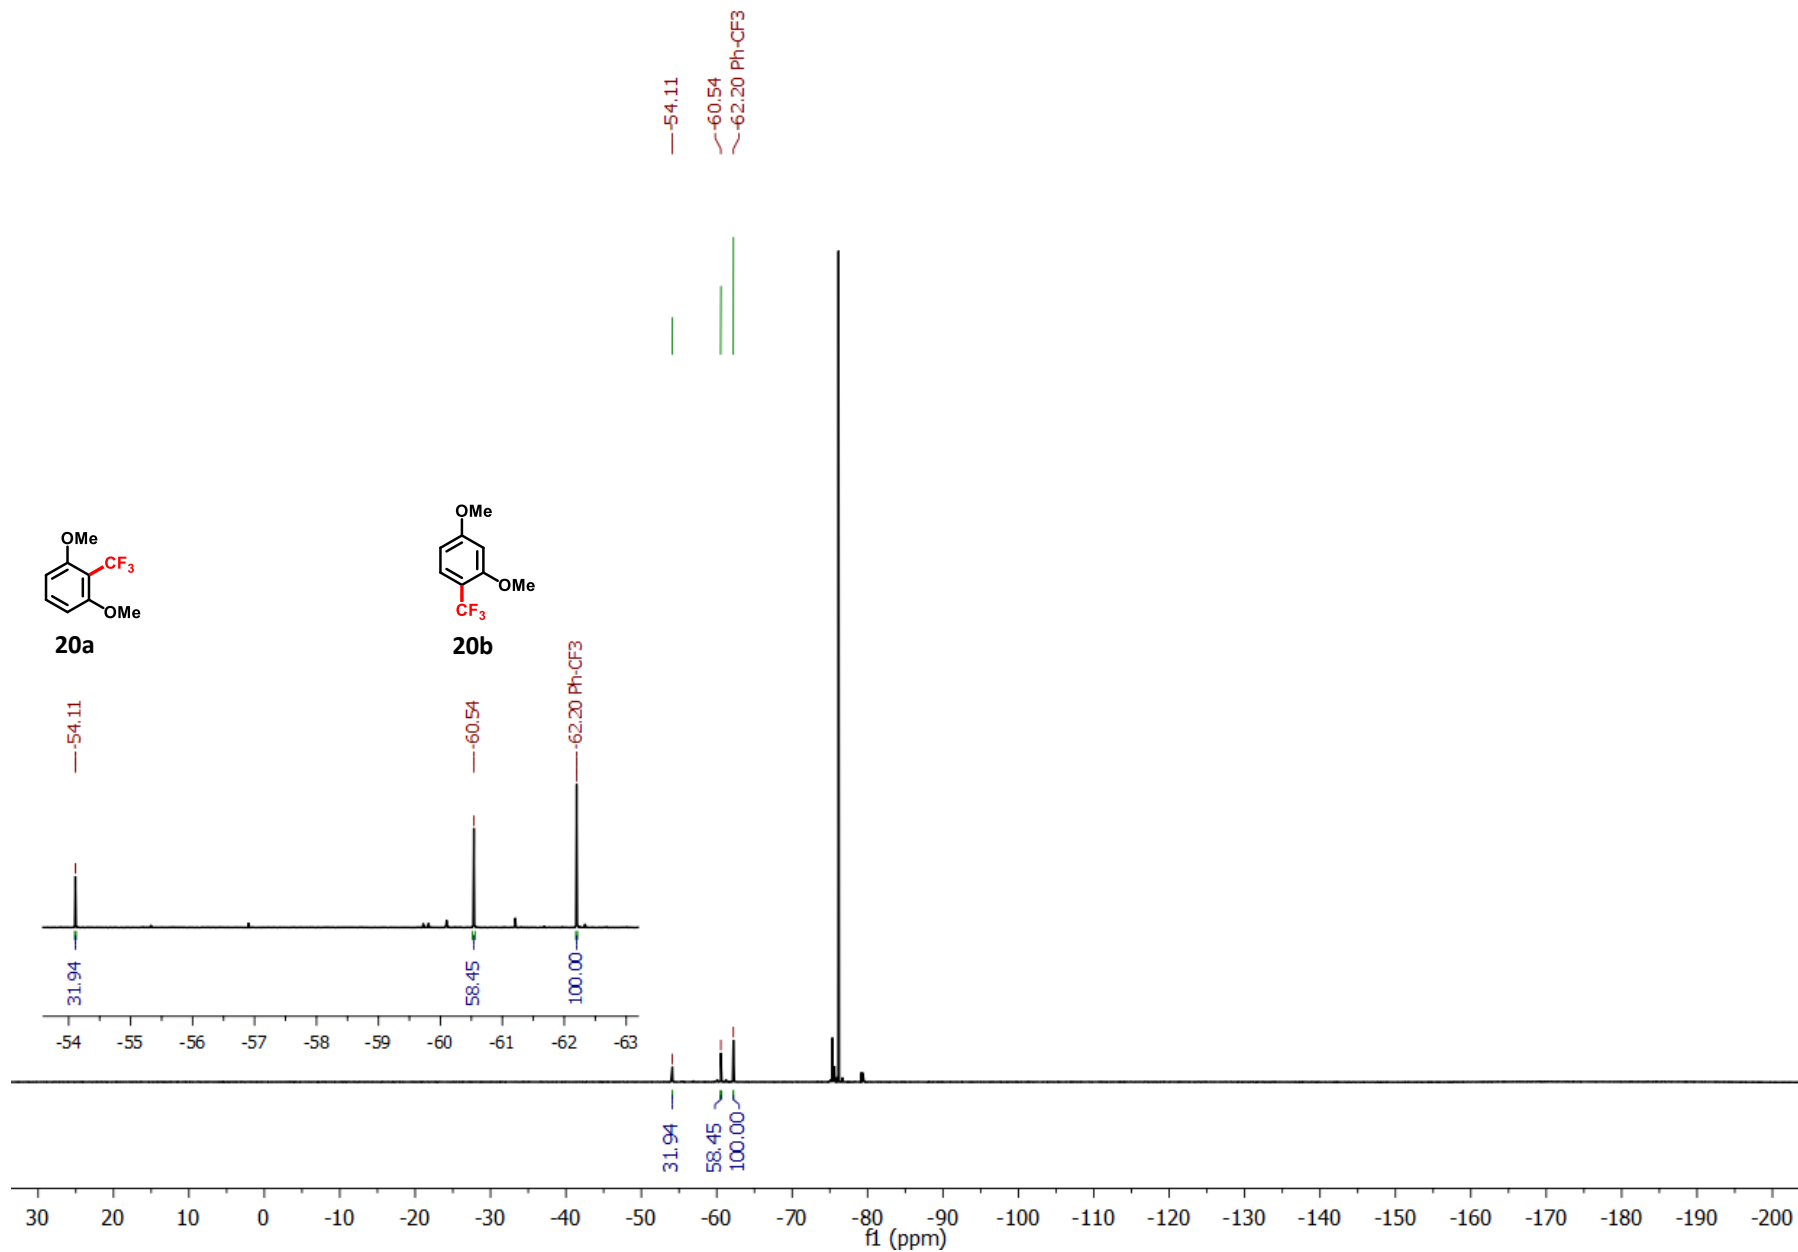

(21)  $^{19}\text{F}$  NMR (376 MHz,  $\text{DMSO-}d_6/\text{EtOAc}$ ) for trifluoromethylation of 1,4-dimethoxybenzene

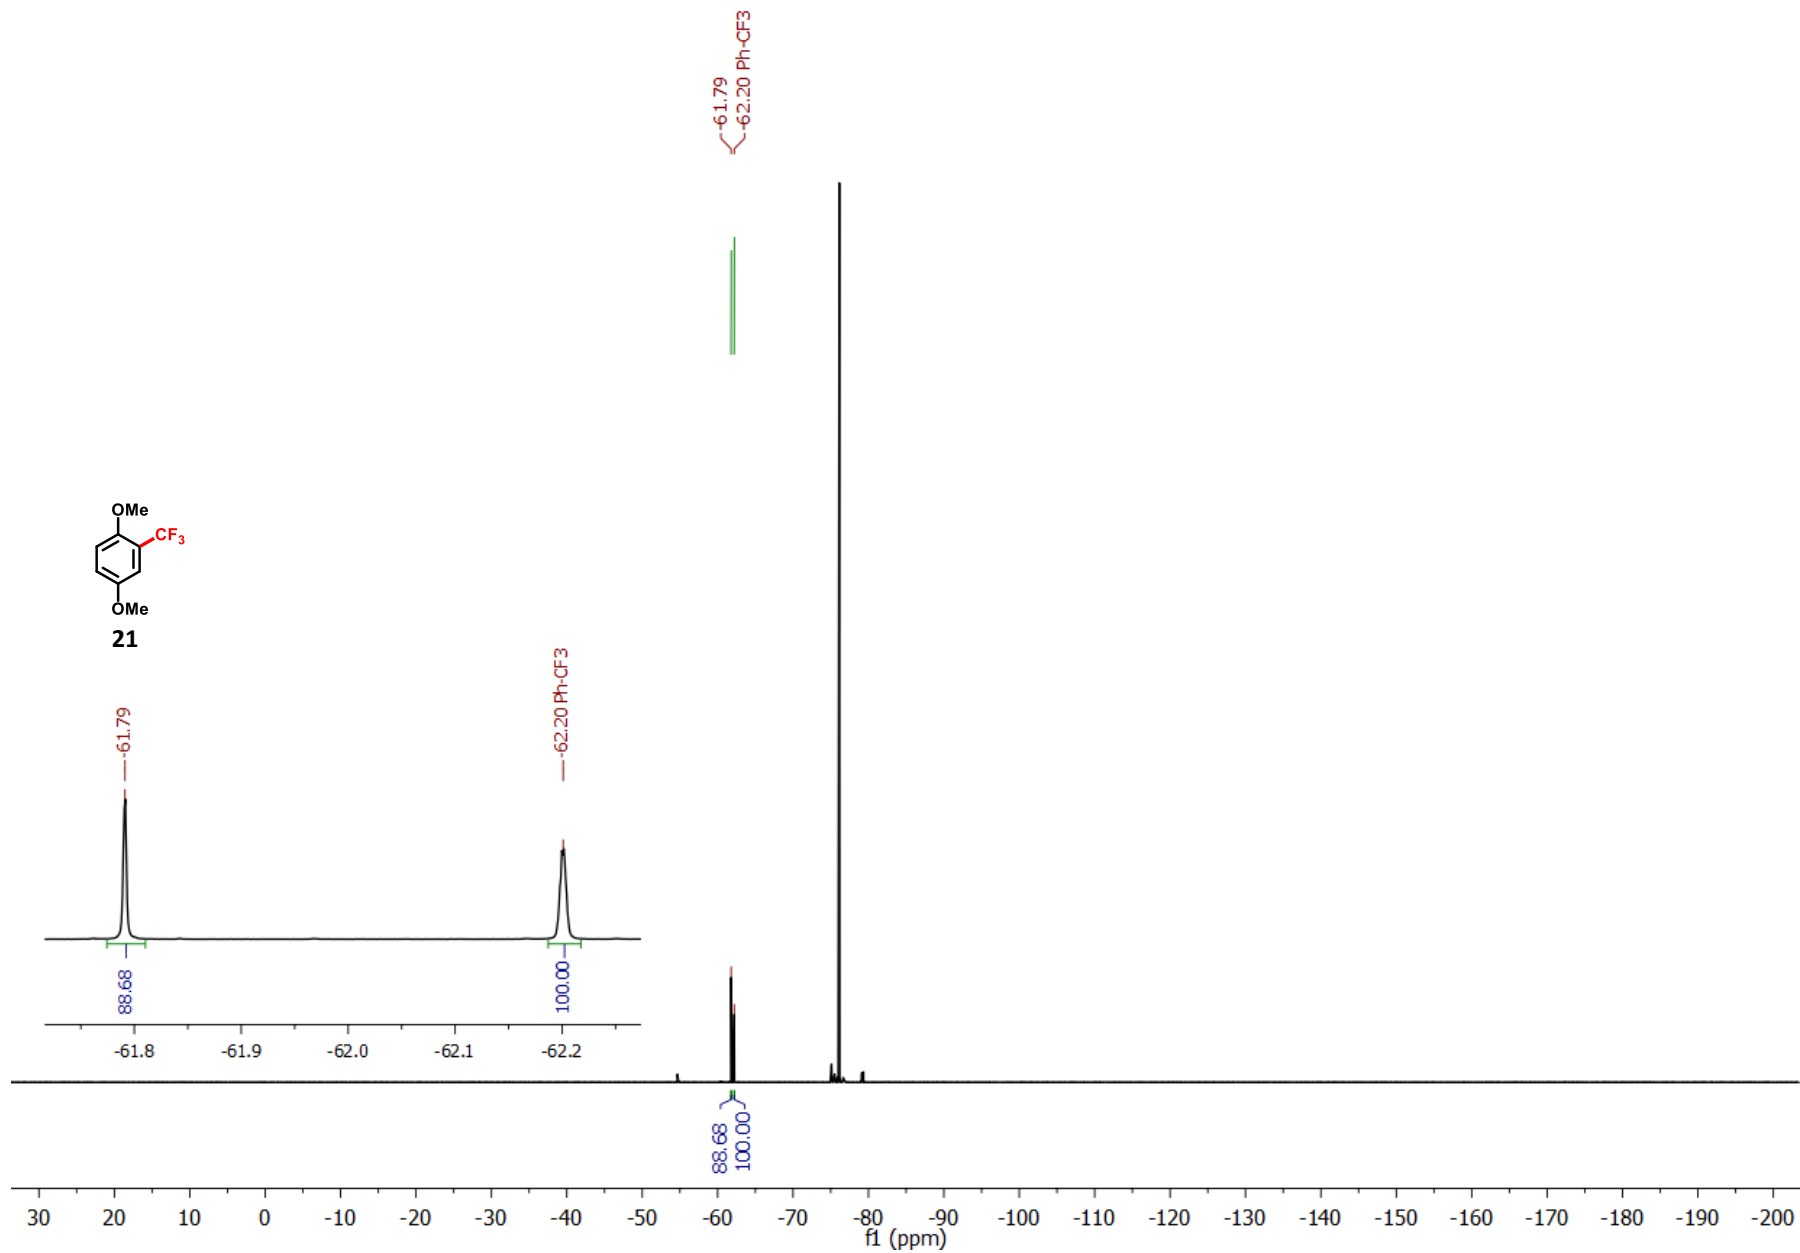

(22)  $^{19}\text{F}$  NMR (376 MHz,  $\text{DMSO-}d_6/\text{EtOAc}$ ) for trifluoromethylation of 3,5-dimethoxytoluene

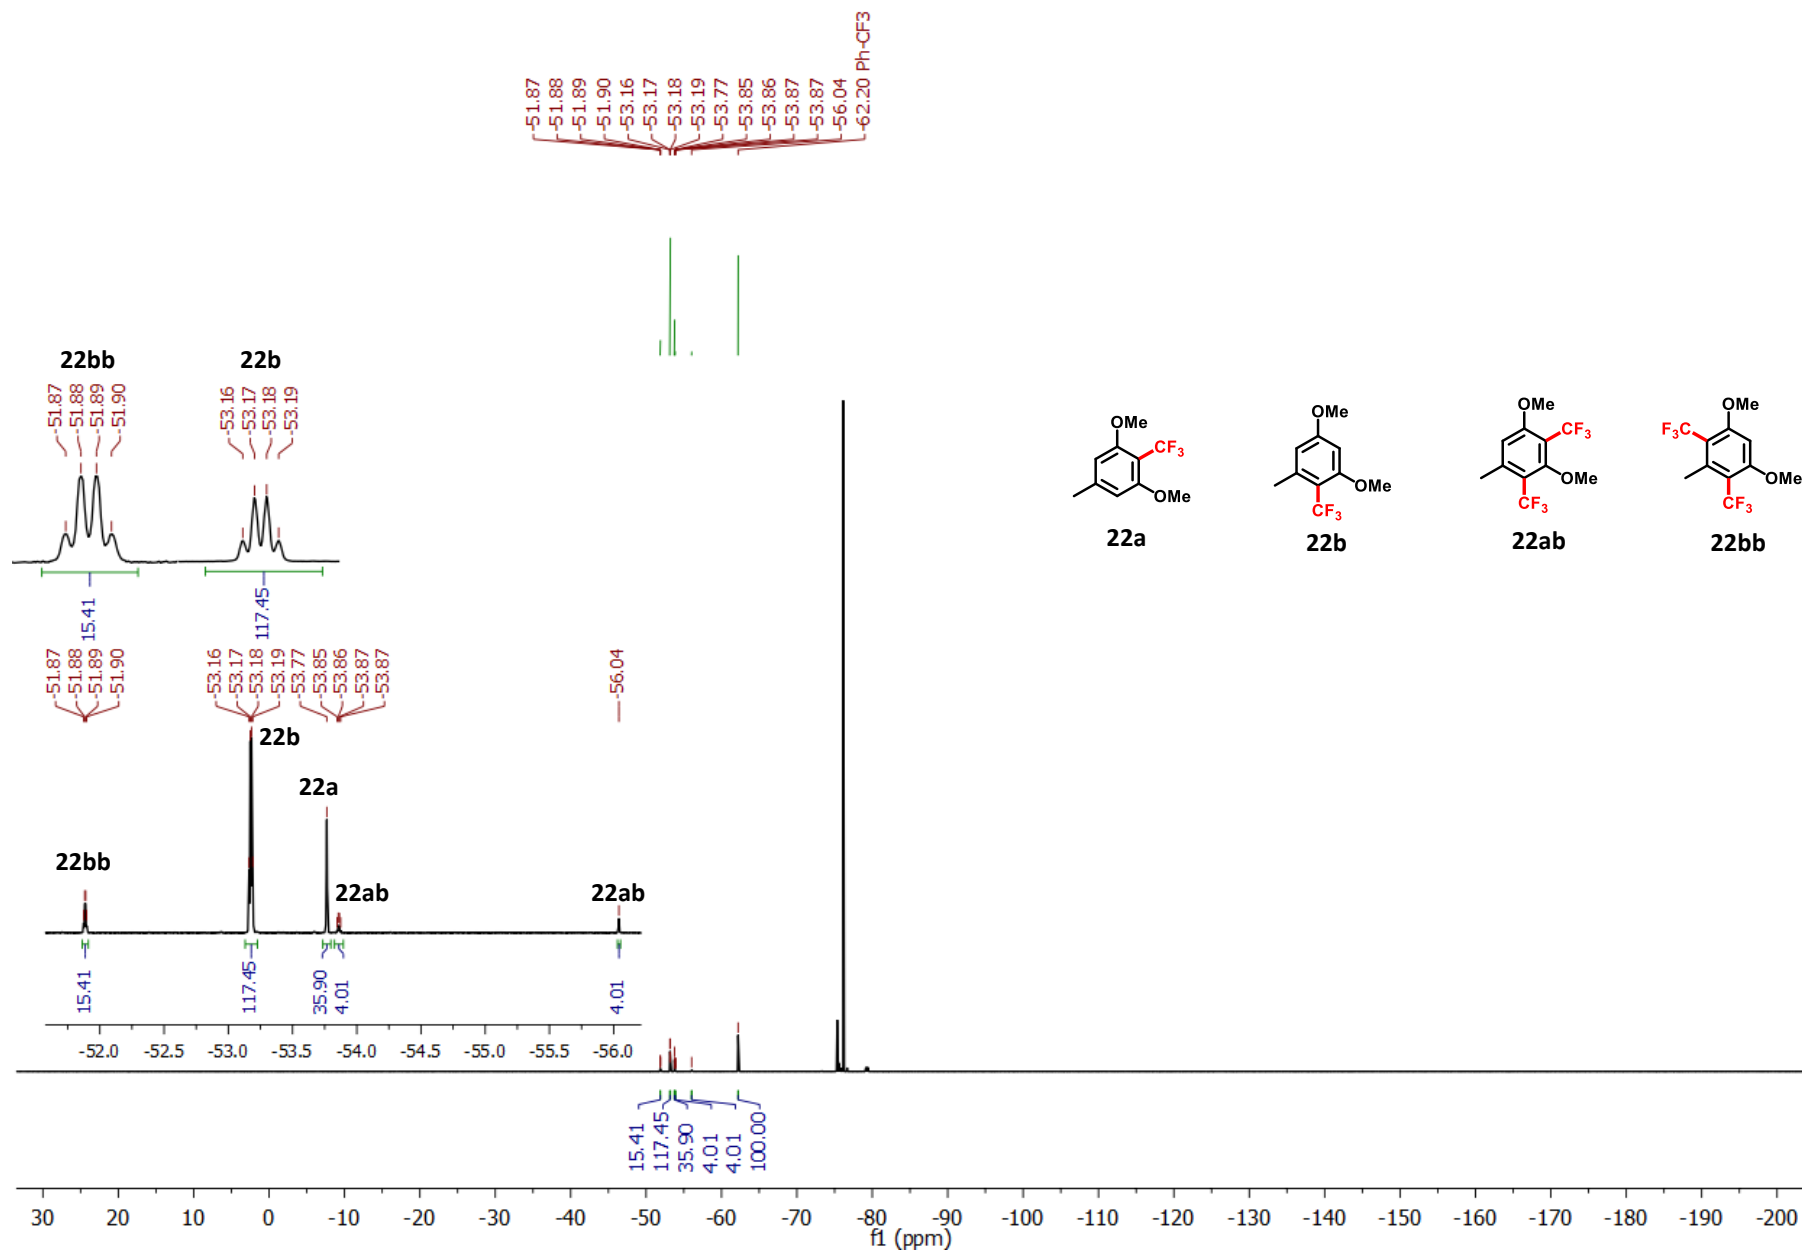

(23)  $^{19}\text{F}$  NMR (376 MHz,  $\text{DMSO-}d_6/\text{EtOAc}$ ) for trifluoromethylation of 1,2,3-trimethoxybenzene

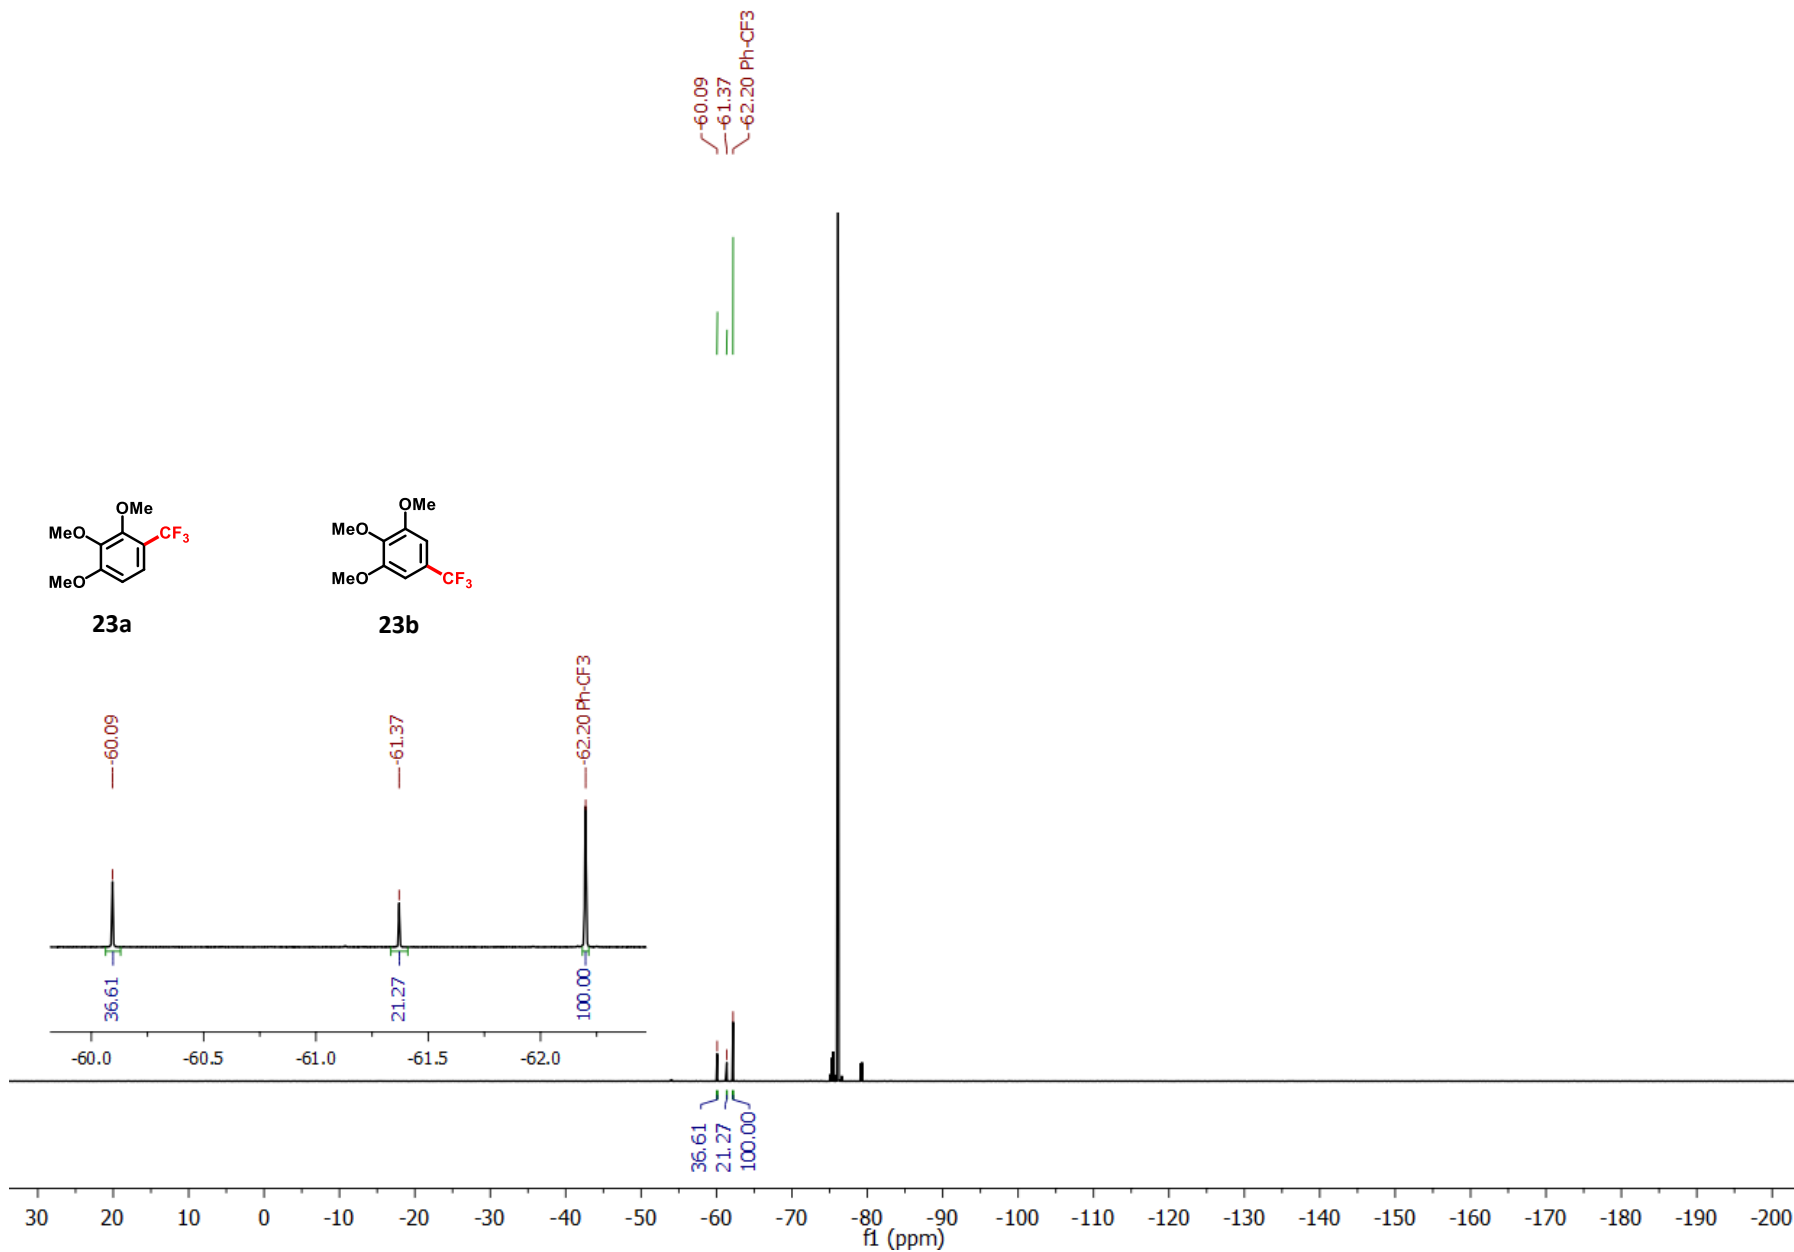

(24)  $^{19}\text{F}$  NMR (376 MHz,  $\text{DMSO-}d_6/\text{EtOAc}$ ) for trifluoromethylation of acetophenone

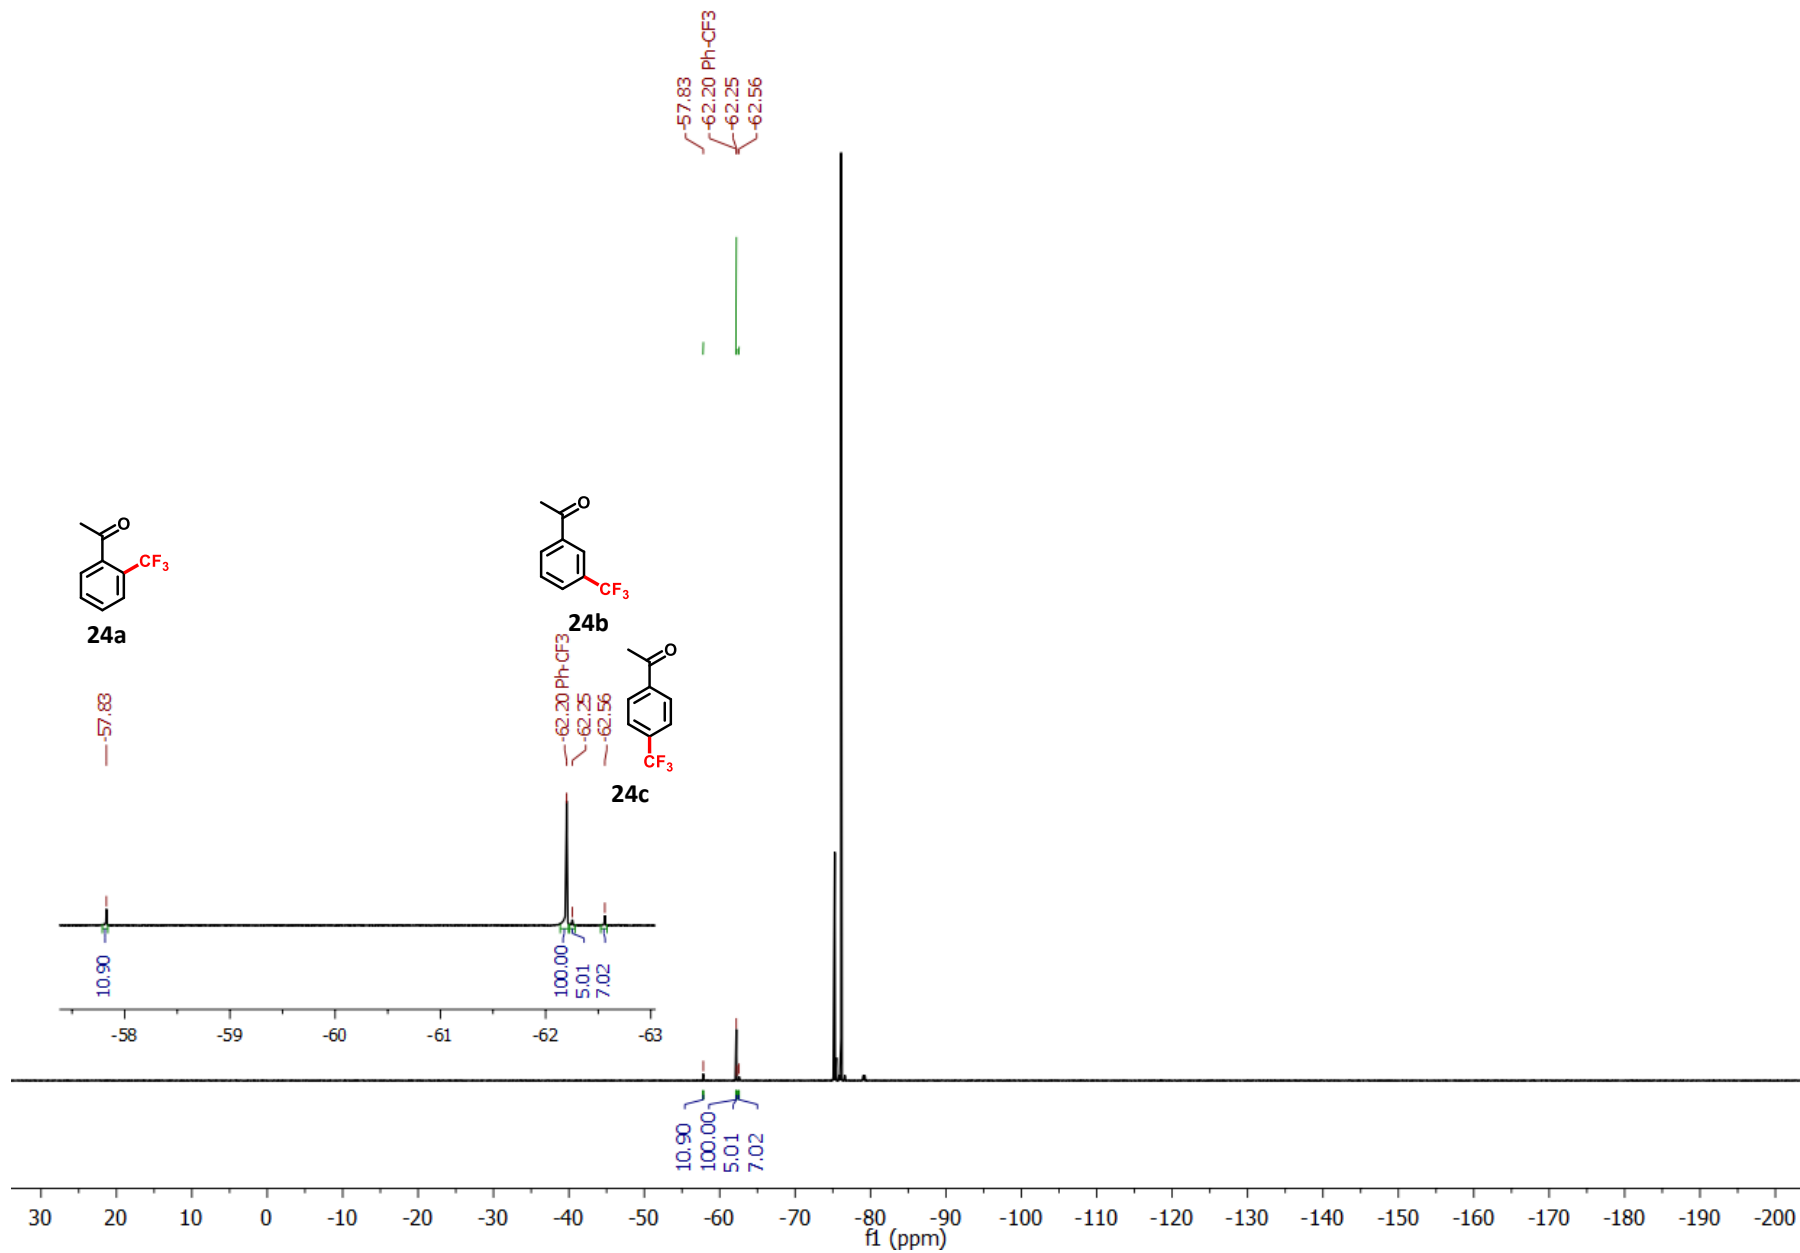

(25)  $^{19}\text{F}$  NMR (376 MHz,  $\text{CDCl}_3/\text{EtOAc}$ ) for trifluoromethylation of methyl benzoate

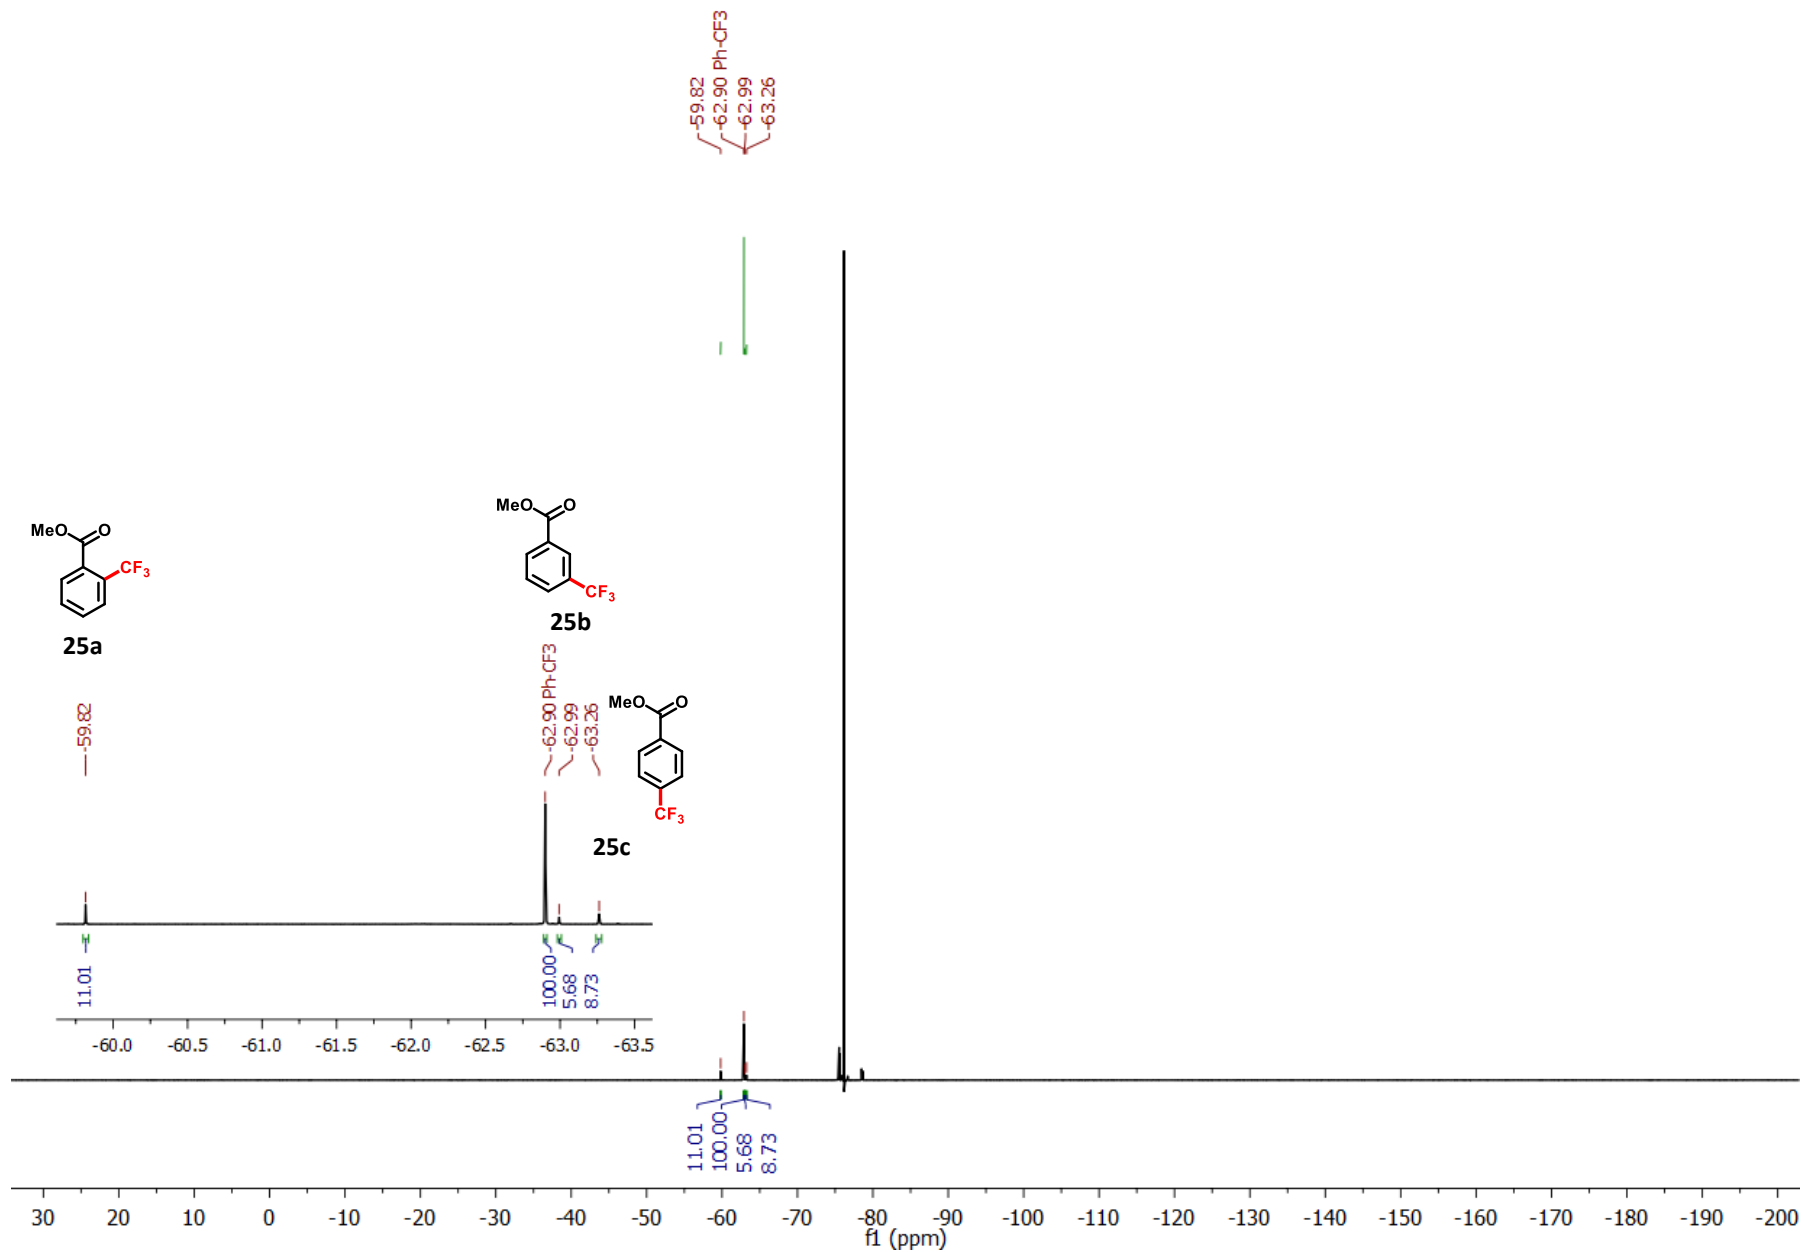

(26)  $^{19}\text{F}$  NMR (376 MHz,  $\text{DMSO-}d_6/\text{EtOAc}$ ) for trifluoromethylation of 1-(3,4,5-trimethoxyphenyl)ethan-1-one

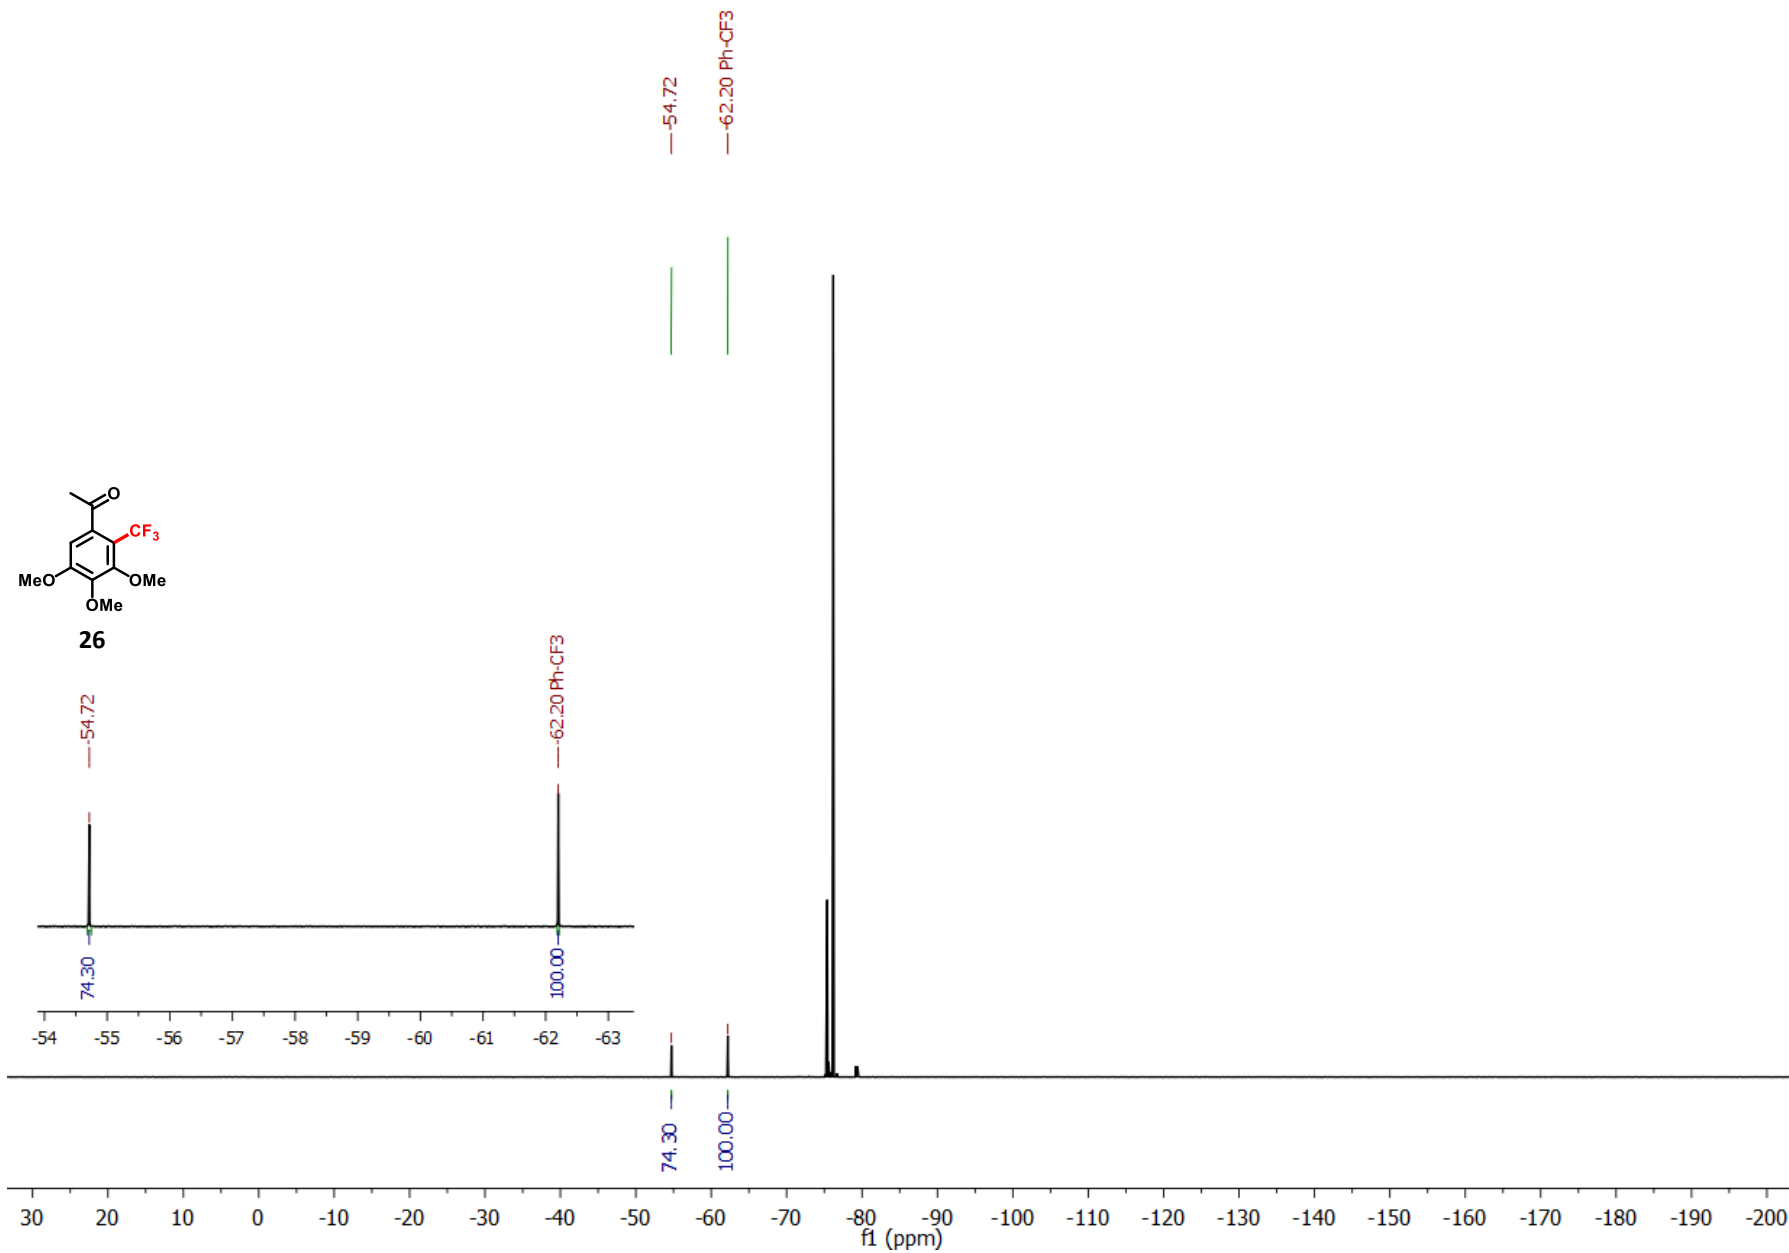

(27)  $^{19}\text{F}$  NMR (376 MHz,  $\text{DMSO-}d_6/\text{EtOAc}$ ) for trifluoromethylation of 1-methyl-1H-indole

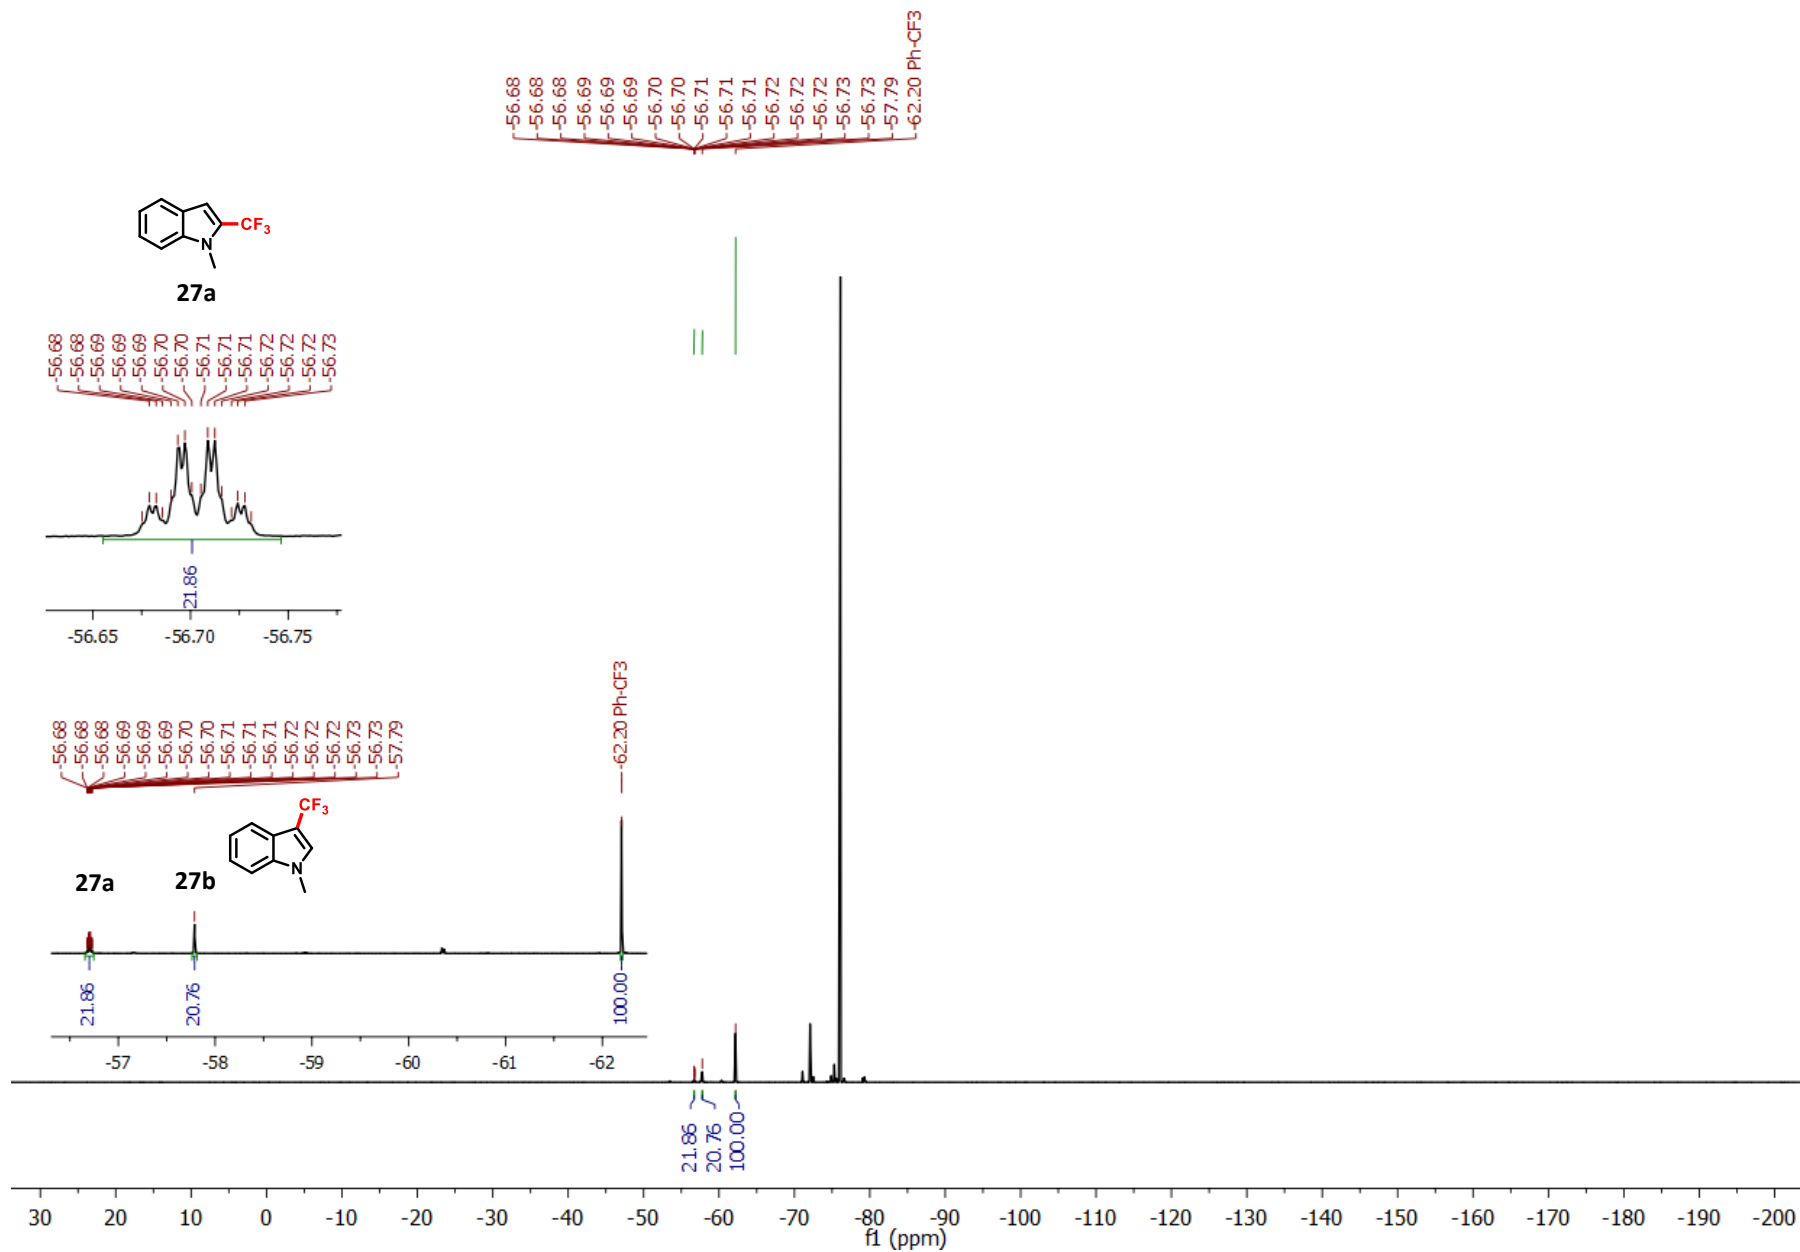

(28)  $^{19}\text{F}$  NMR (376 MHz,  $\text{CDCl}_3/\text{EtOAc}$ ) for trifluoromethylation of tert-butyl 1H-indole-1-carboxylate

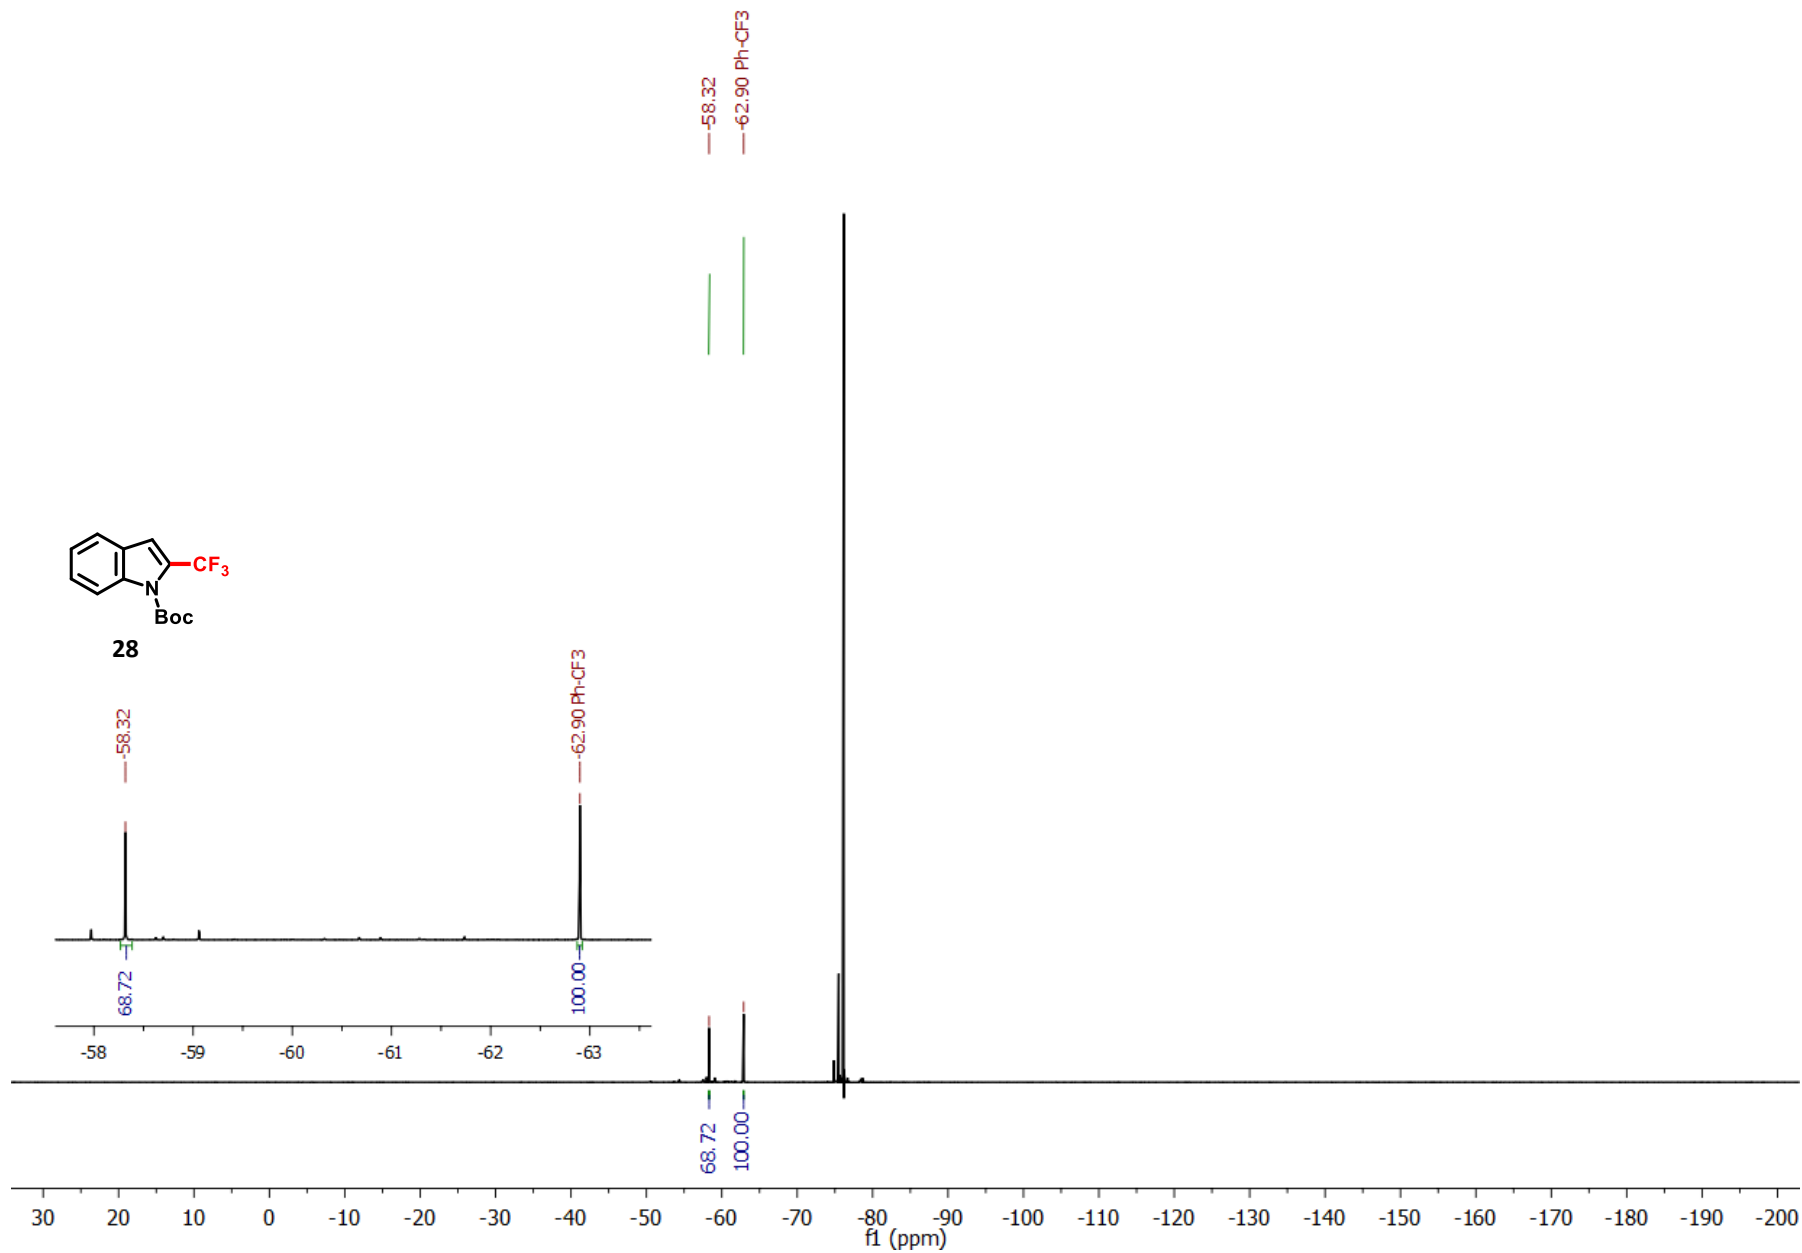

(29)  $^{19}\text{F}$  NMR (376 MHz,  $\text{DMSO-}d_6/\text{EtOAc}$ ) for trifluoromethylation thiophene

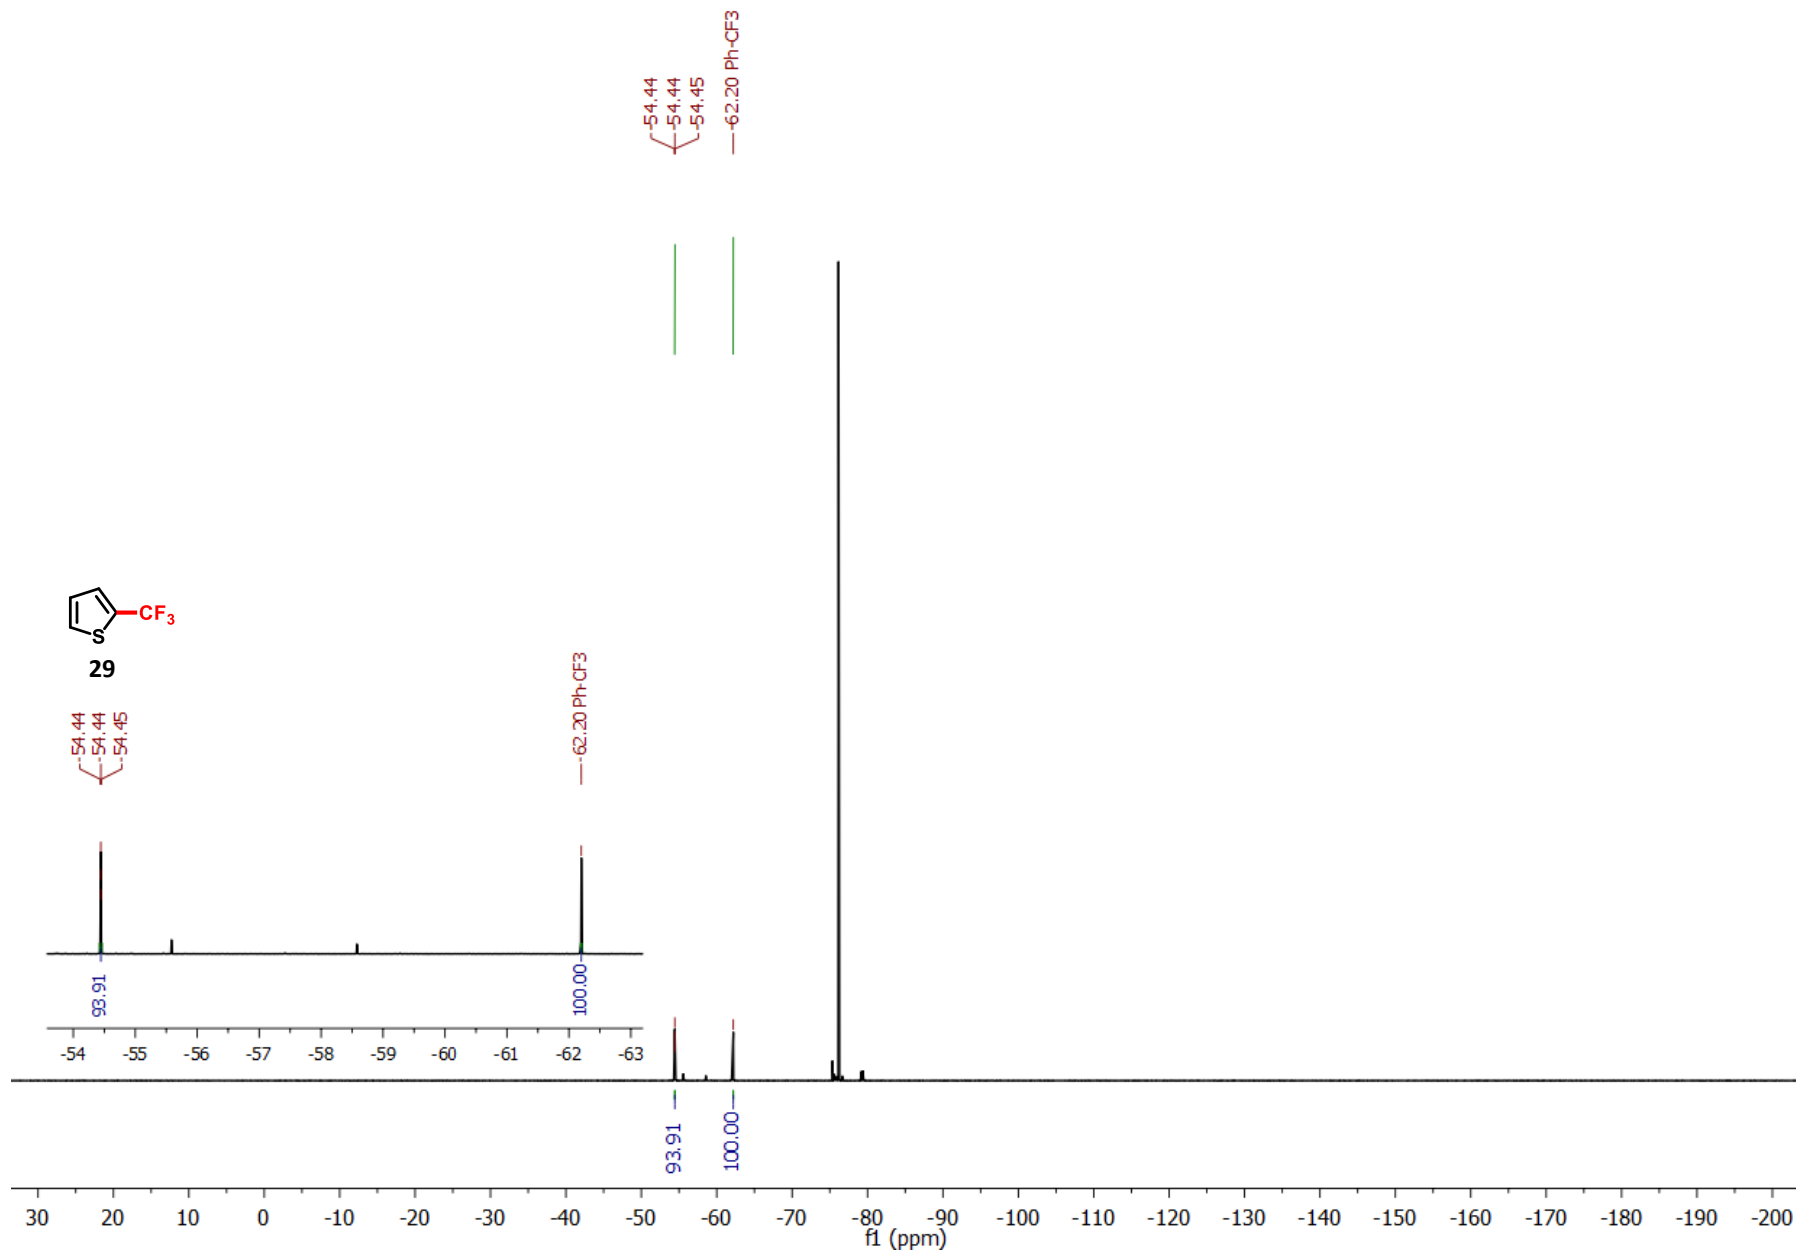

(30)  $^{19}\text{F}$  NMR (376 MHz,  $\text{DMSO-}d_6/\text{EtOAc}$ ) for trifluoromethylation 2-bromothiophene

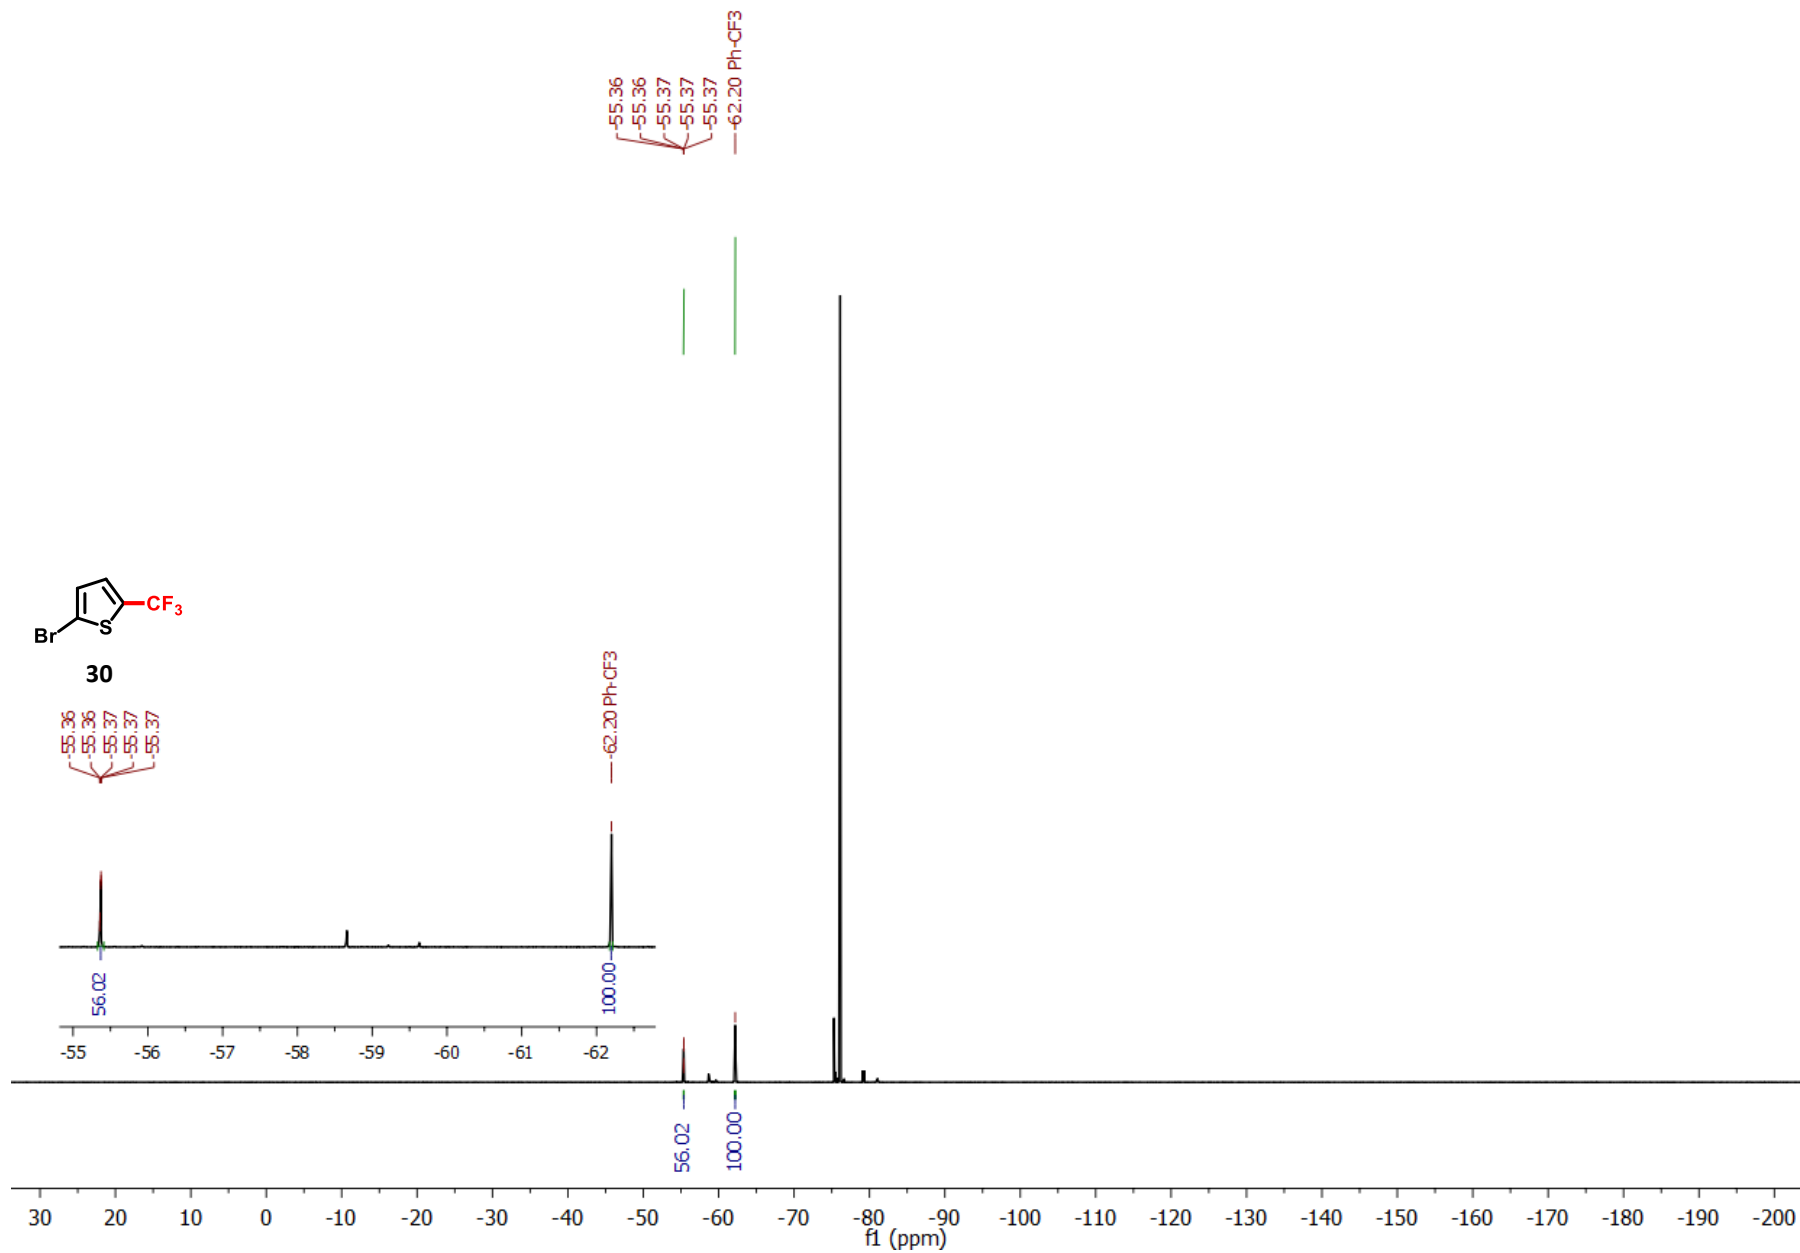

(31)  $^{19}\text{F}$  NMR (376 MHz,  $\text{DMSO-}d_6/\text{EtOAc}$ ) for trifluoromethylation of caffeine

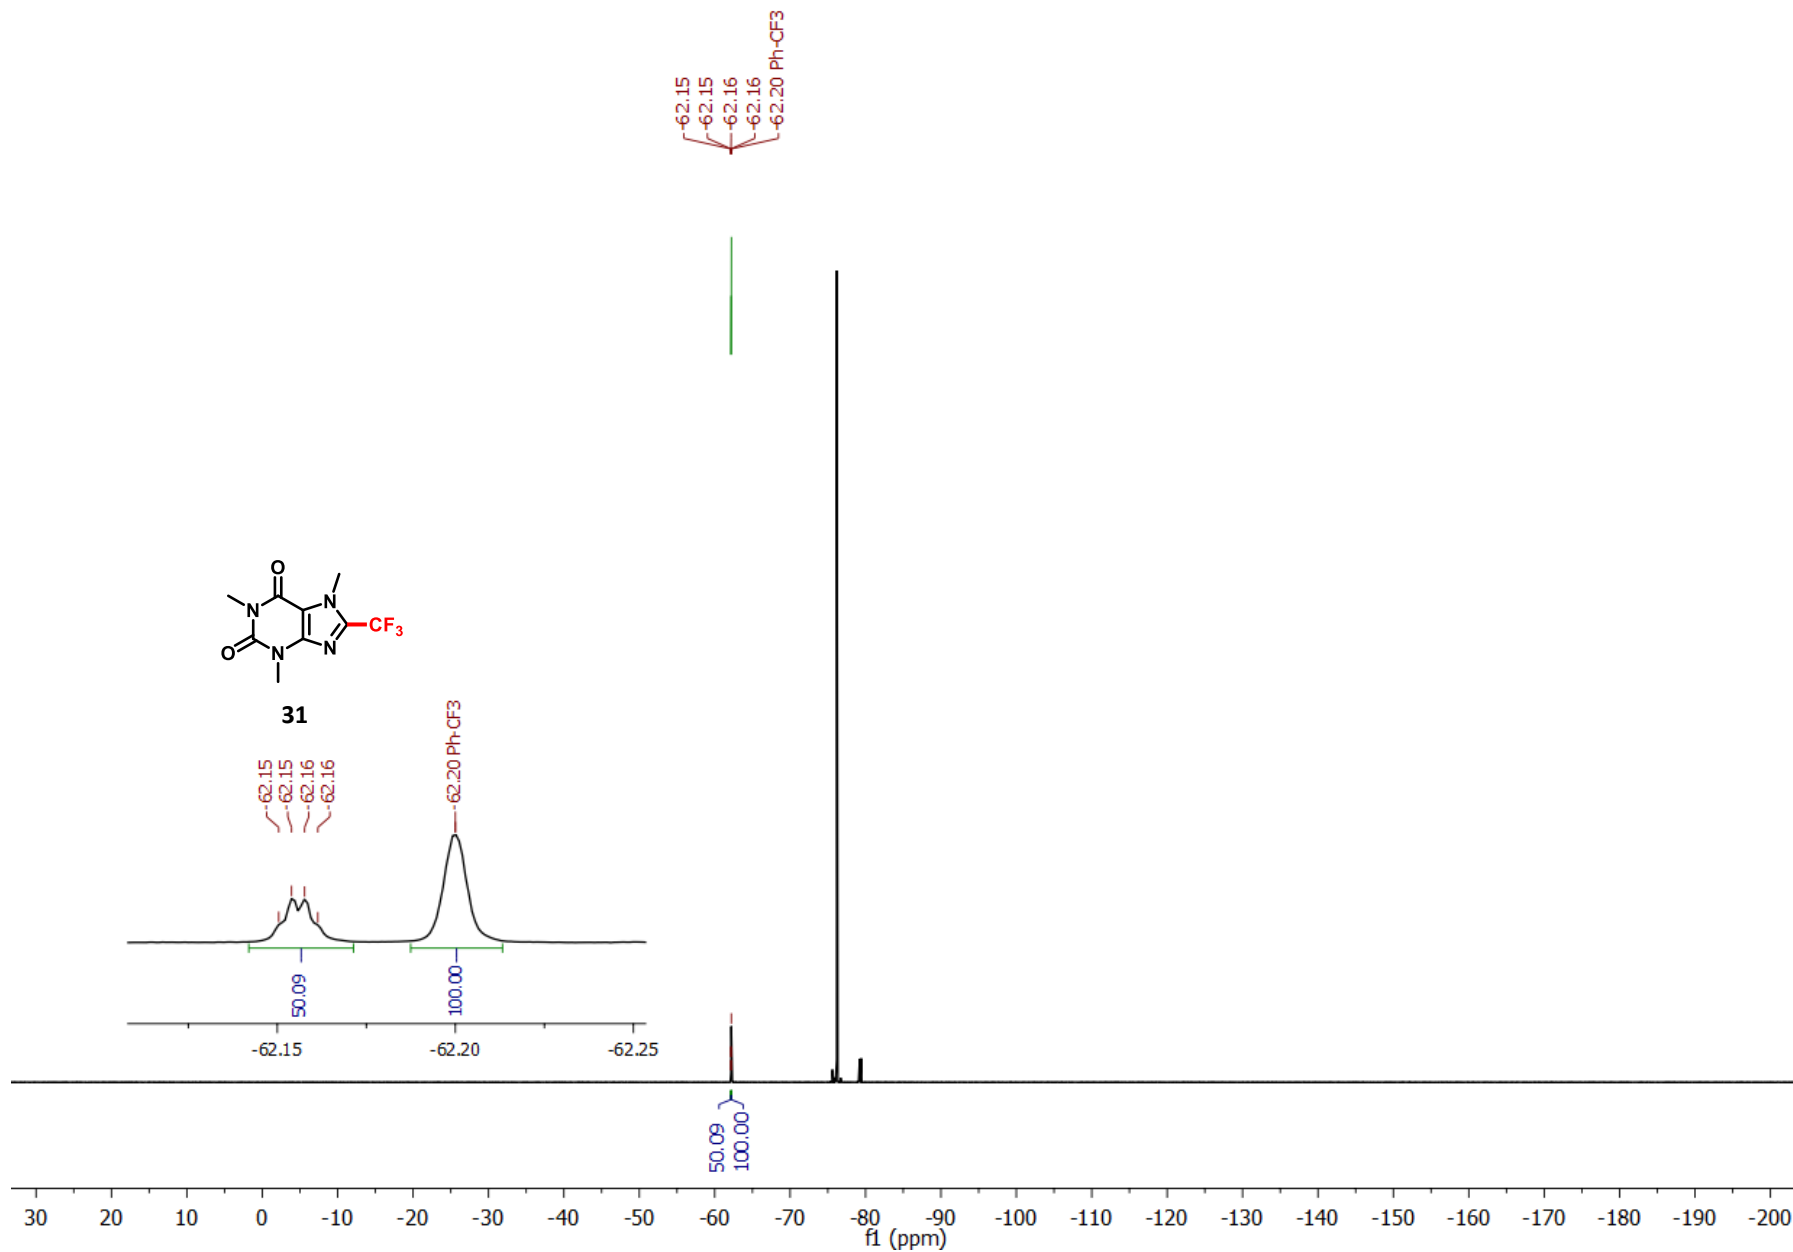

(32)  $^{19}\text{F}$  NMR (376 MHz,  $\text{DMSO-}d_6/\text{EtOAc}$ ) for trifluoromethylation of chlorobenzene

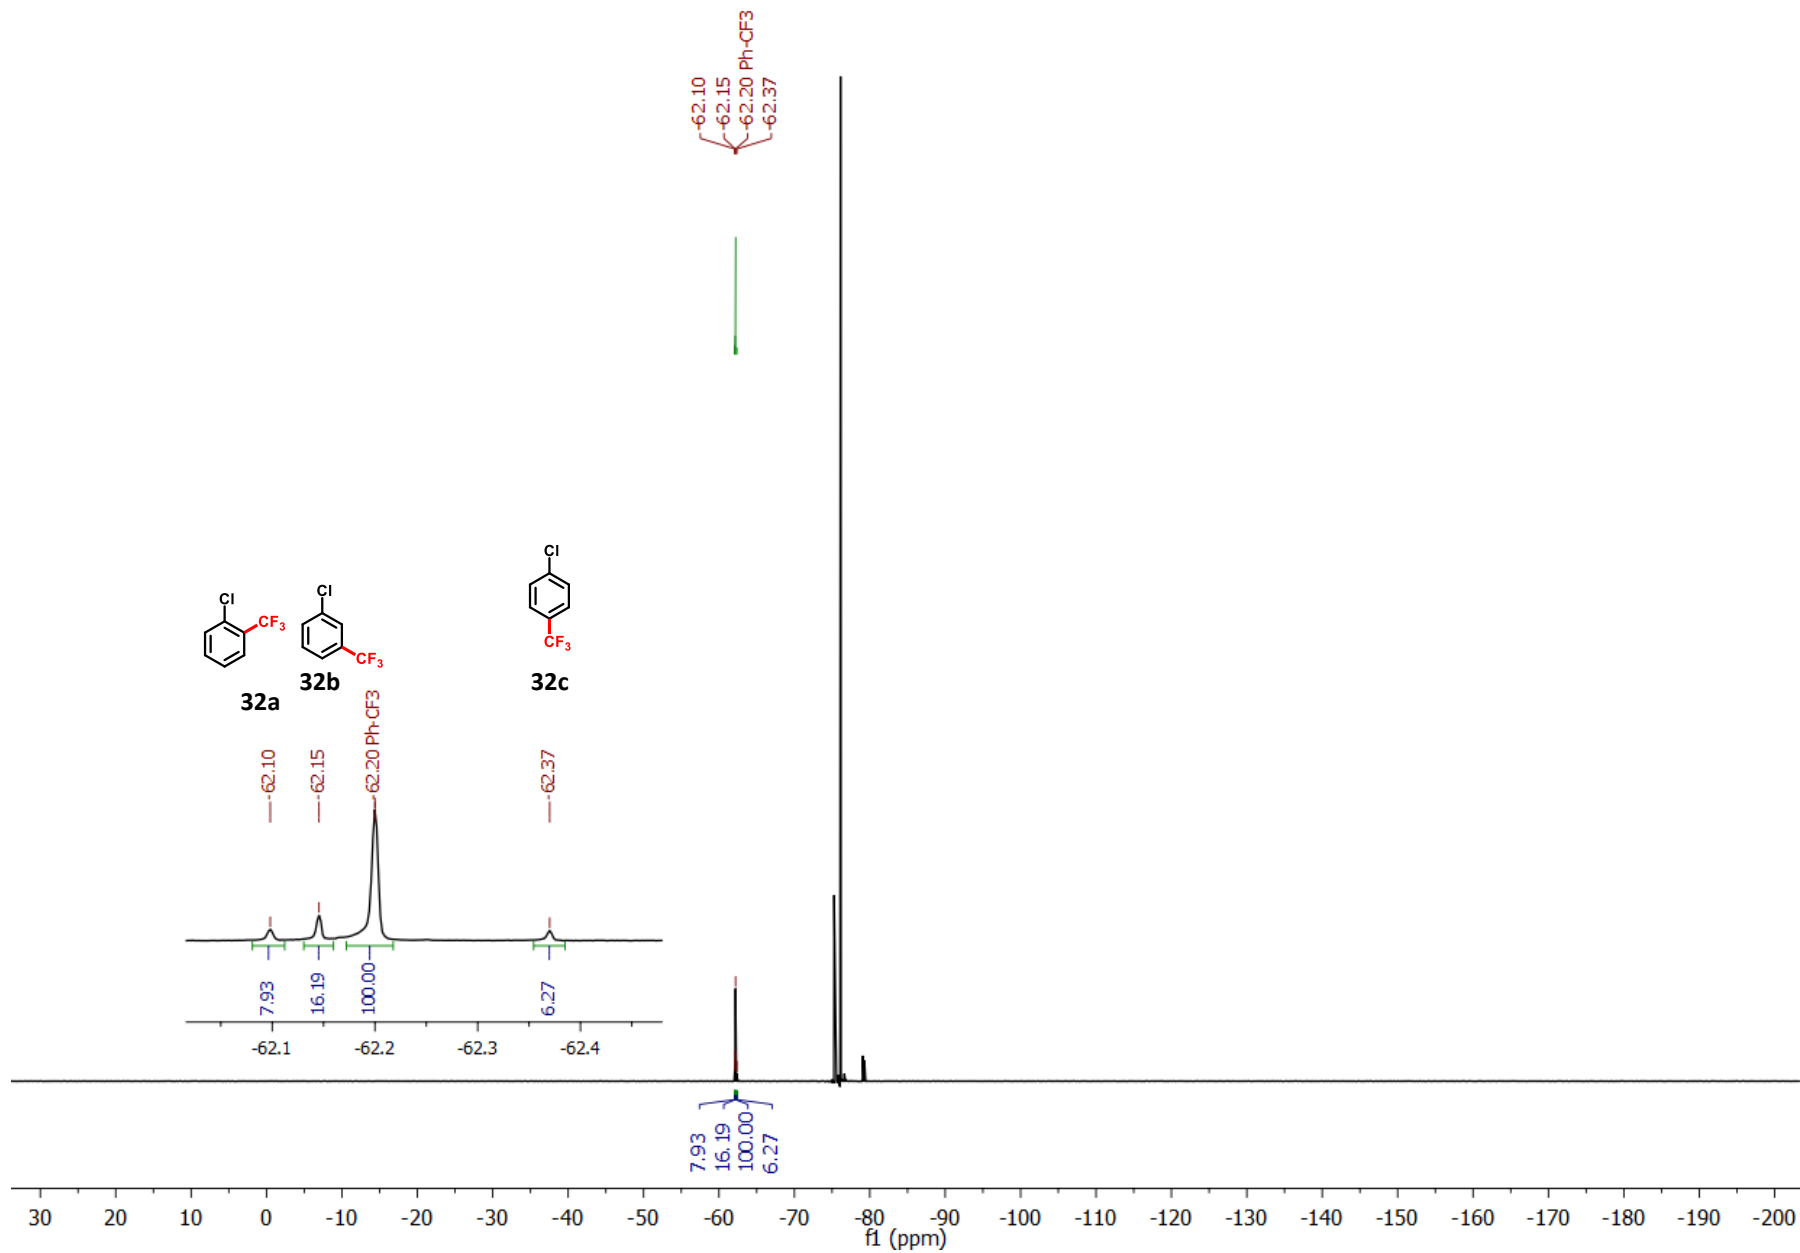

(33)  $^{19}\text{F}$  NMR (376 MHz,  $\text{DMSO-}d_6/\text{EtOAc}$ ) for trifluoromethylation of bromobenzene

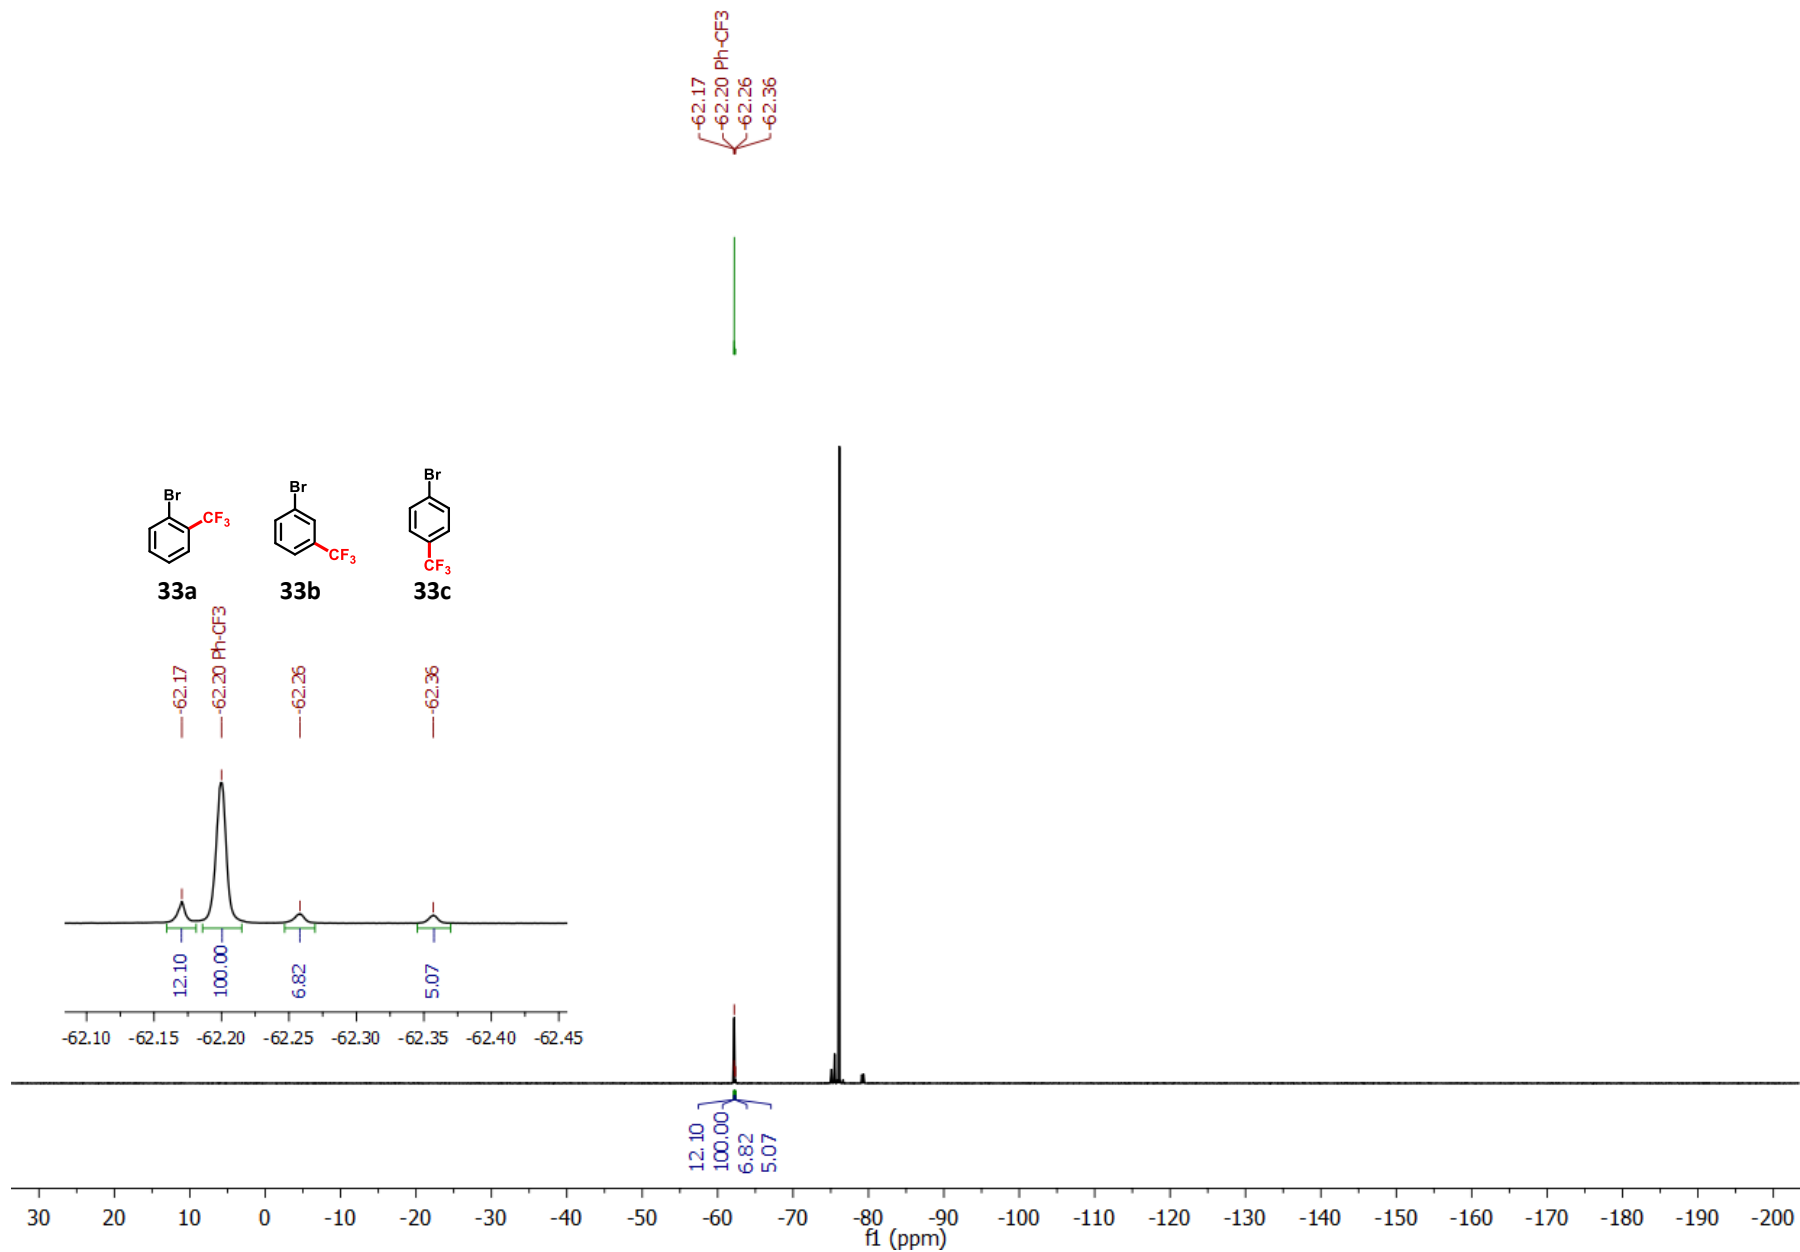

(34)  $^{19}\text{F}$  NMR (376 MHz,  $\text{DMSO-}d_6/\text{EtOAc}$ ) for trifluoromethylation of iodobenzene

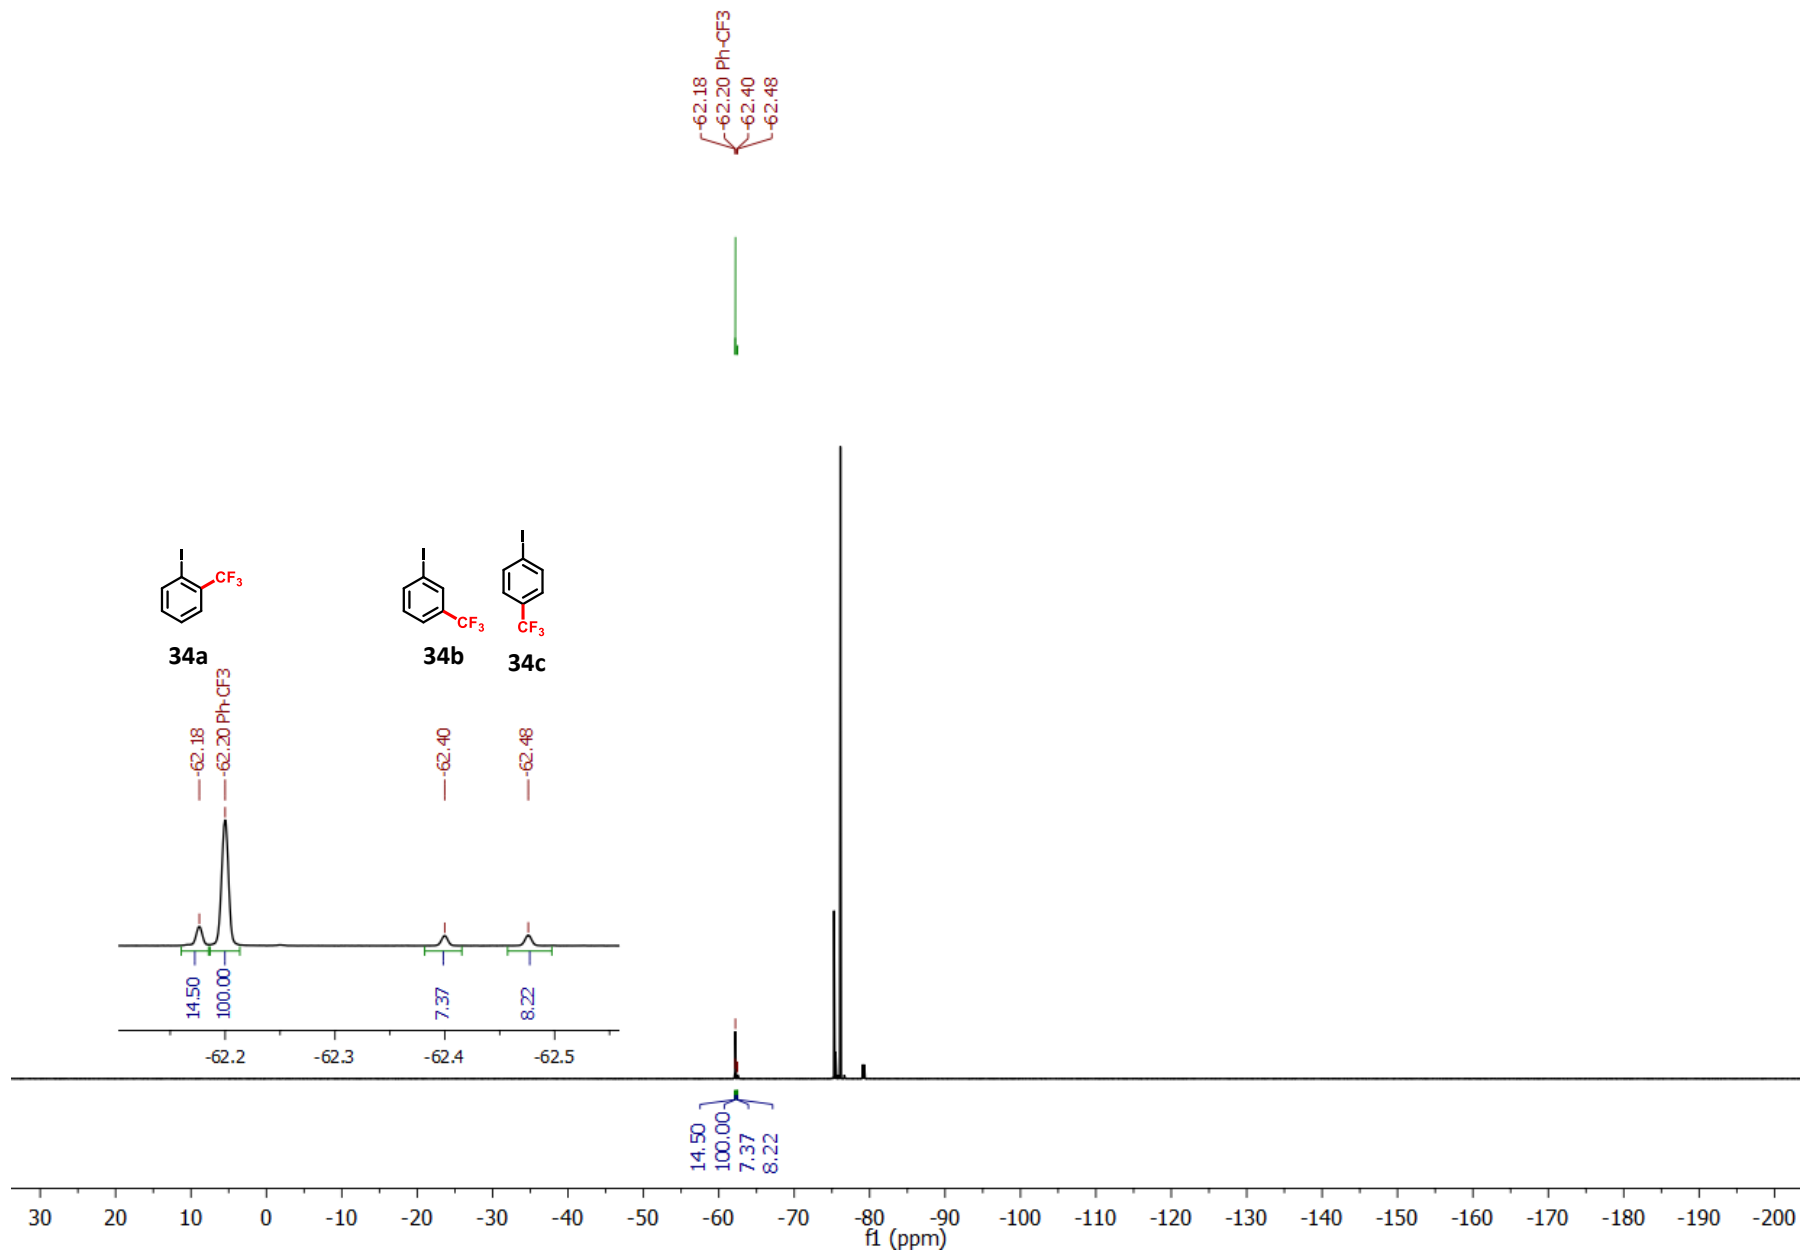

(35)  $^{19}\text{F}$  NMR (376 MHz,  $\text{DMSO-}d_6/\text{EtOAc}$ ) for trifluoromethylation of 1-Chloro-3-methylbenzene (3-chlorotoluene)

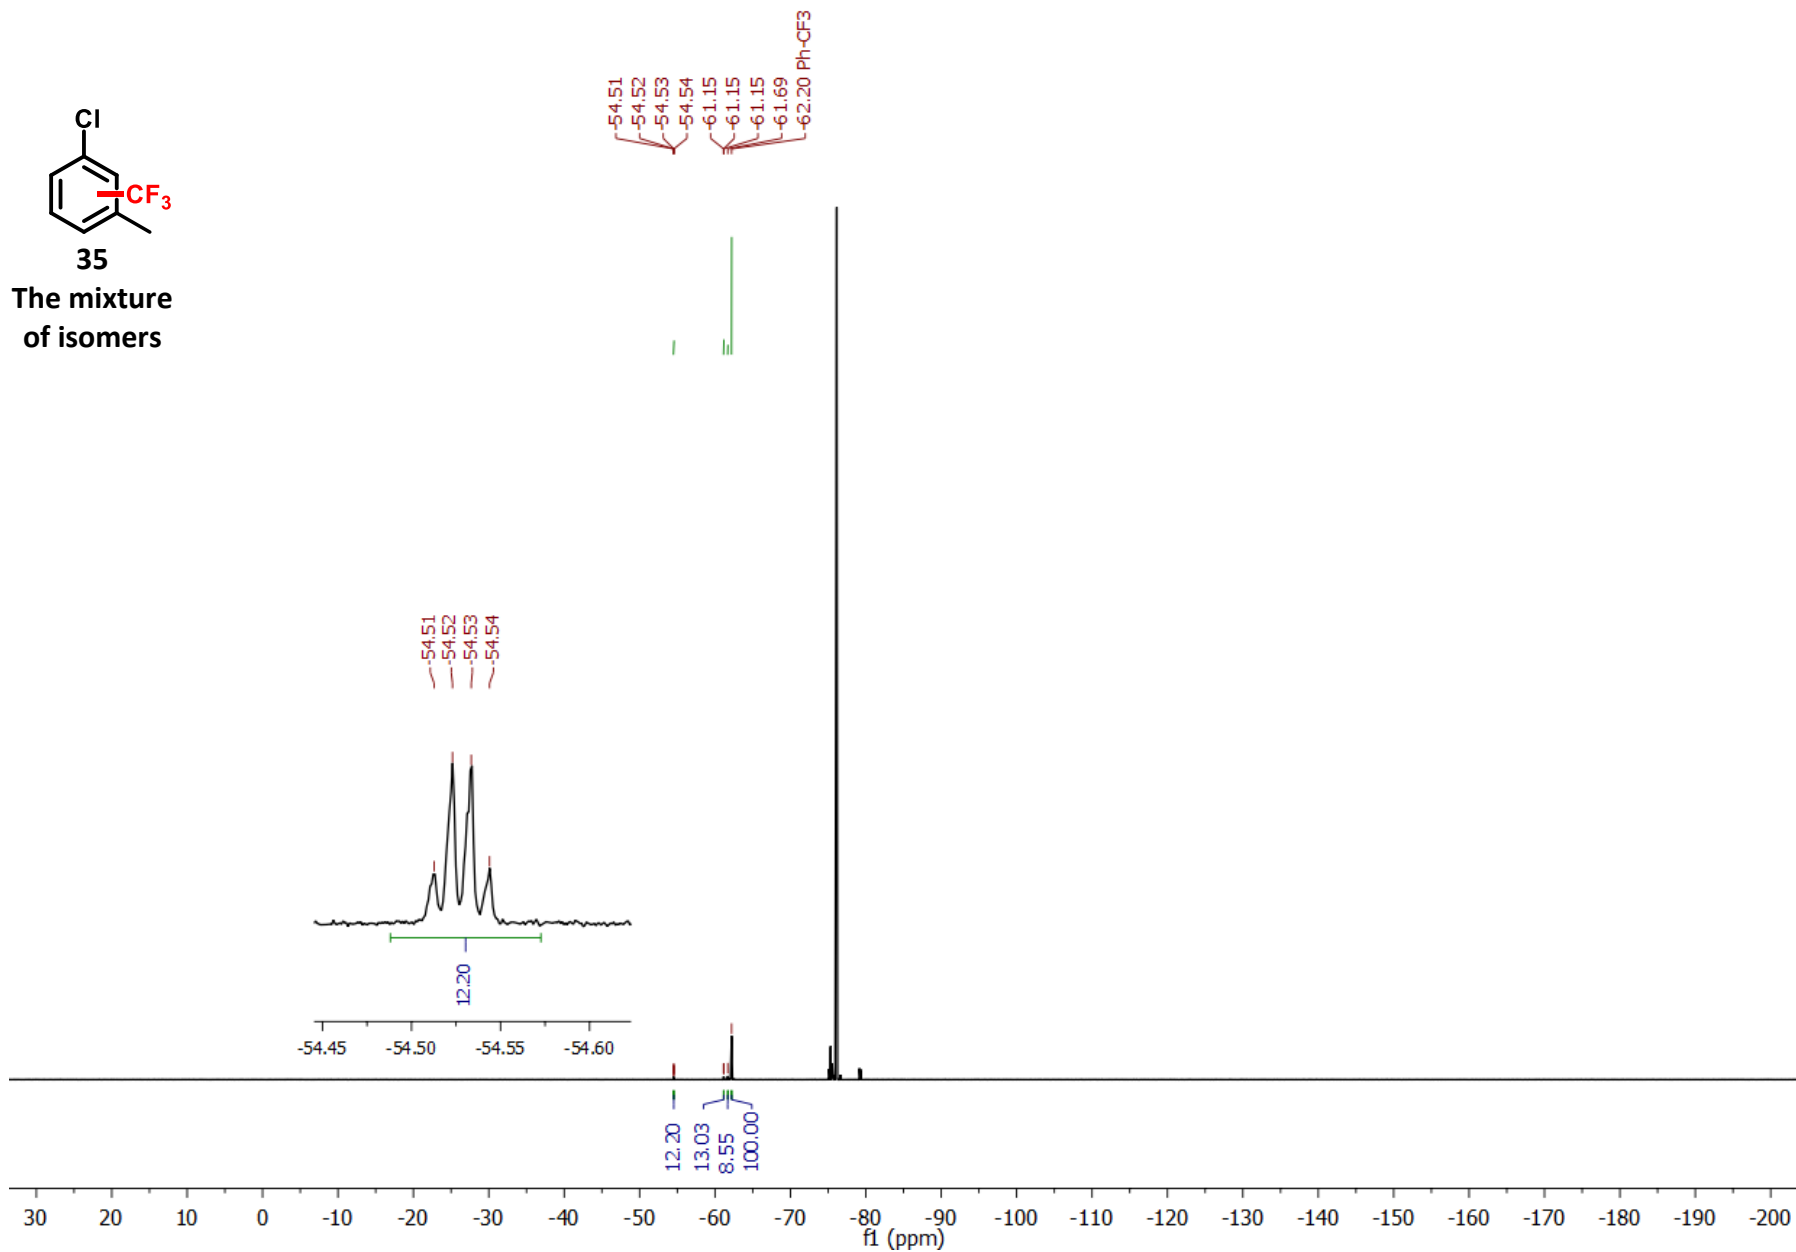

(36)  $^{19}\text{F}$  NMR (376 MHz,  $\text{DMSO-}d_6/\text{EtOAc}$ ) for trifluoromethylation of 1-bromo-2-methylbenzene (2-bromotoluene)

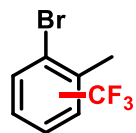

**36**  
The mixture  
of isomers

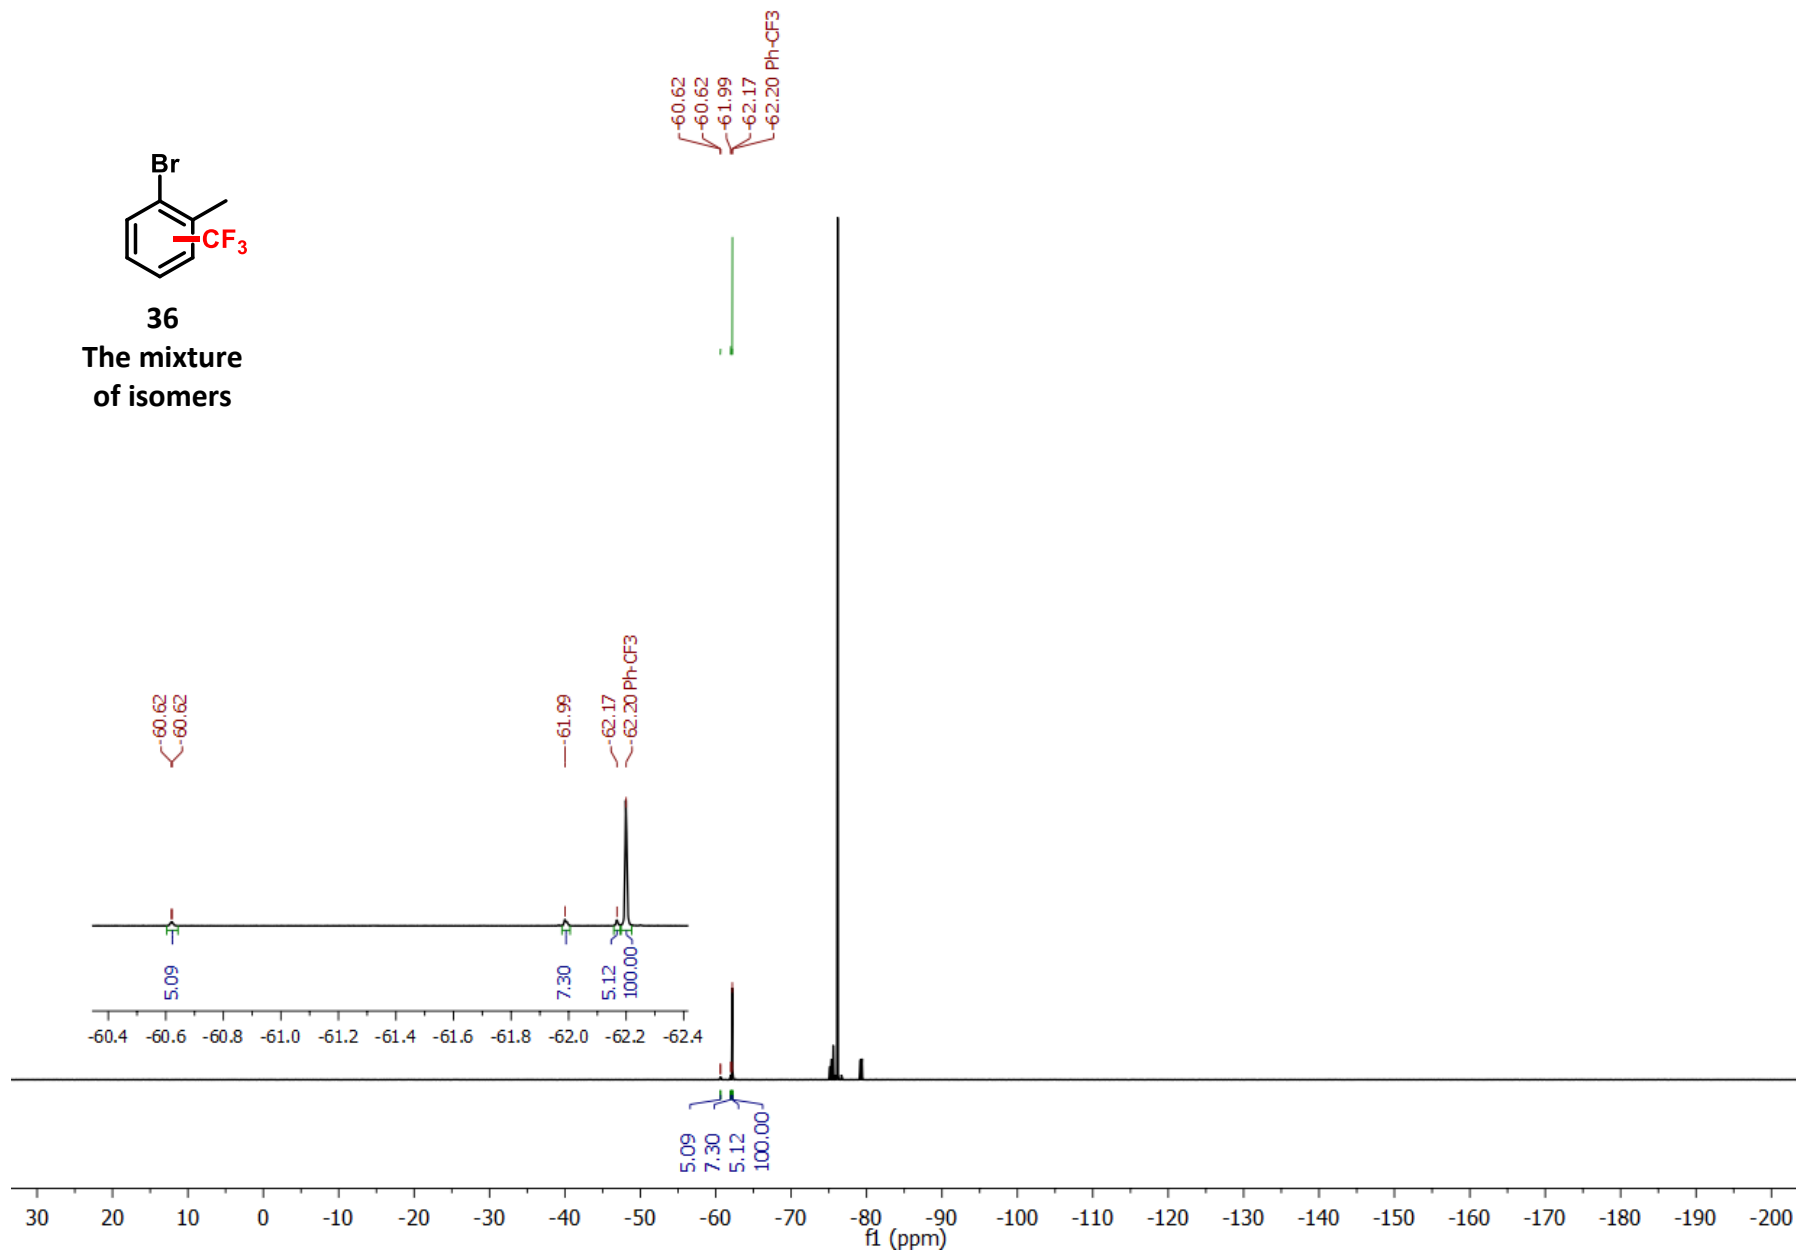

(37)  $^{19}\text{F}$  NMR (376 MHz,  $\text{DMSO-}d_6/\text{EtOAc}$ ) for trifluoromethylation of 1-bromo-3-methylbenzene (3-bromotoluene)

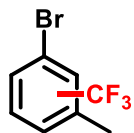

37

The mixture  
of isomers

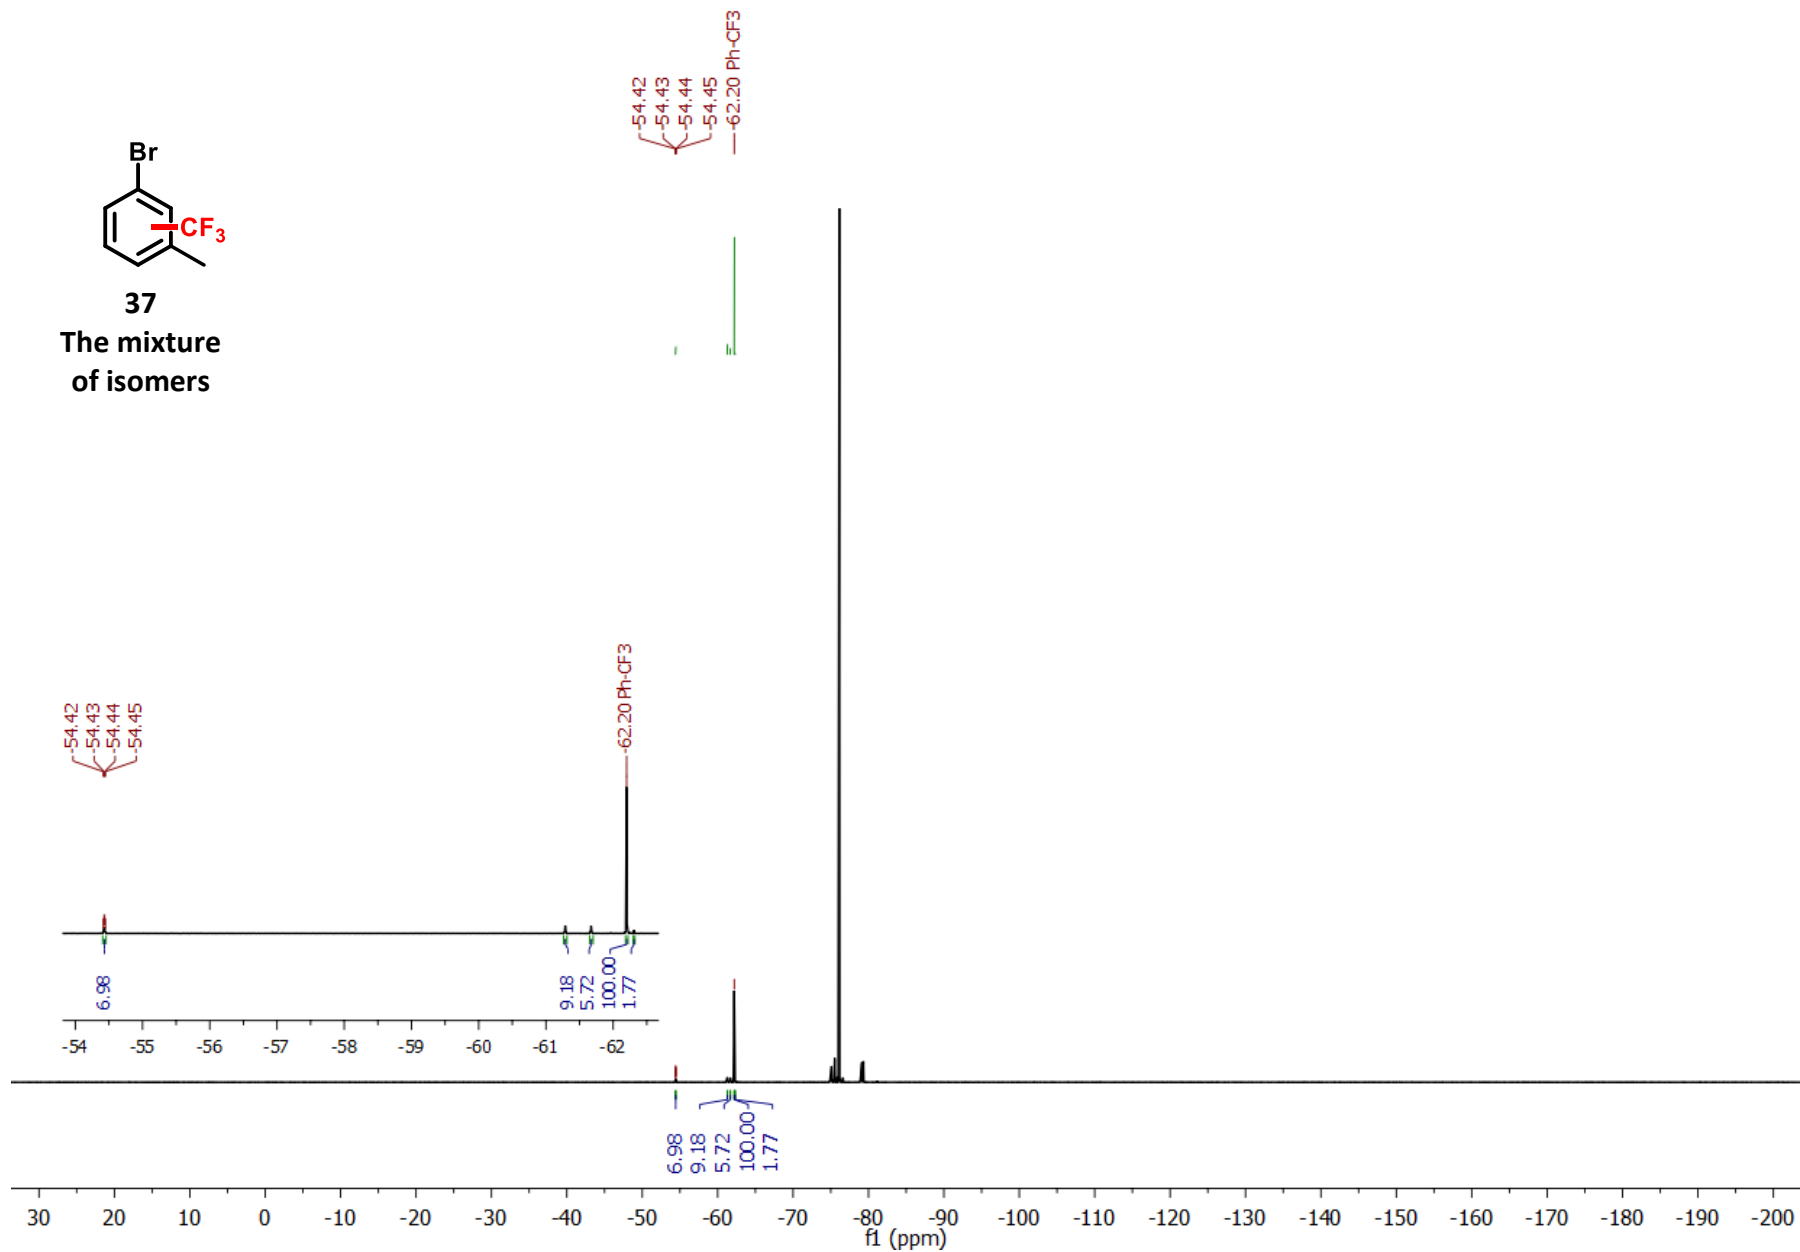

(38)  $^{19}\text{F}$  NMR (376 MHz,  $\text{DMSO-}d_6/\text{EtOAc}$ ) for trifluoromethylation of 1-bromo-4-methylbenzene (4-bromotoluene)

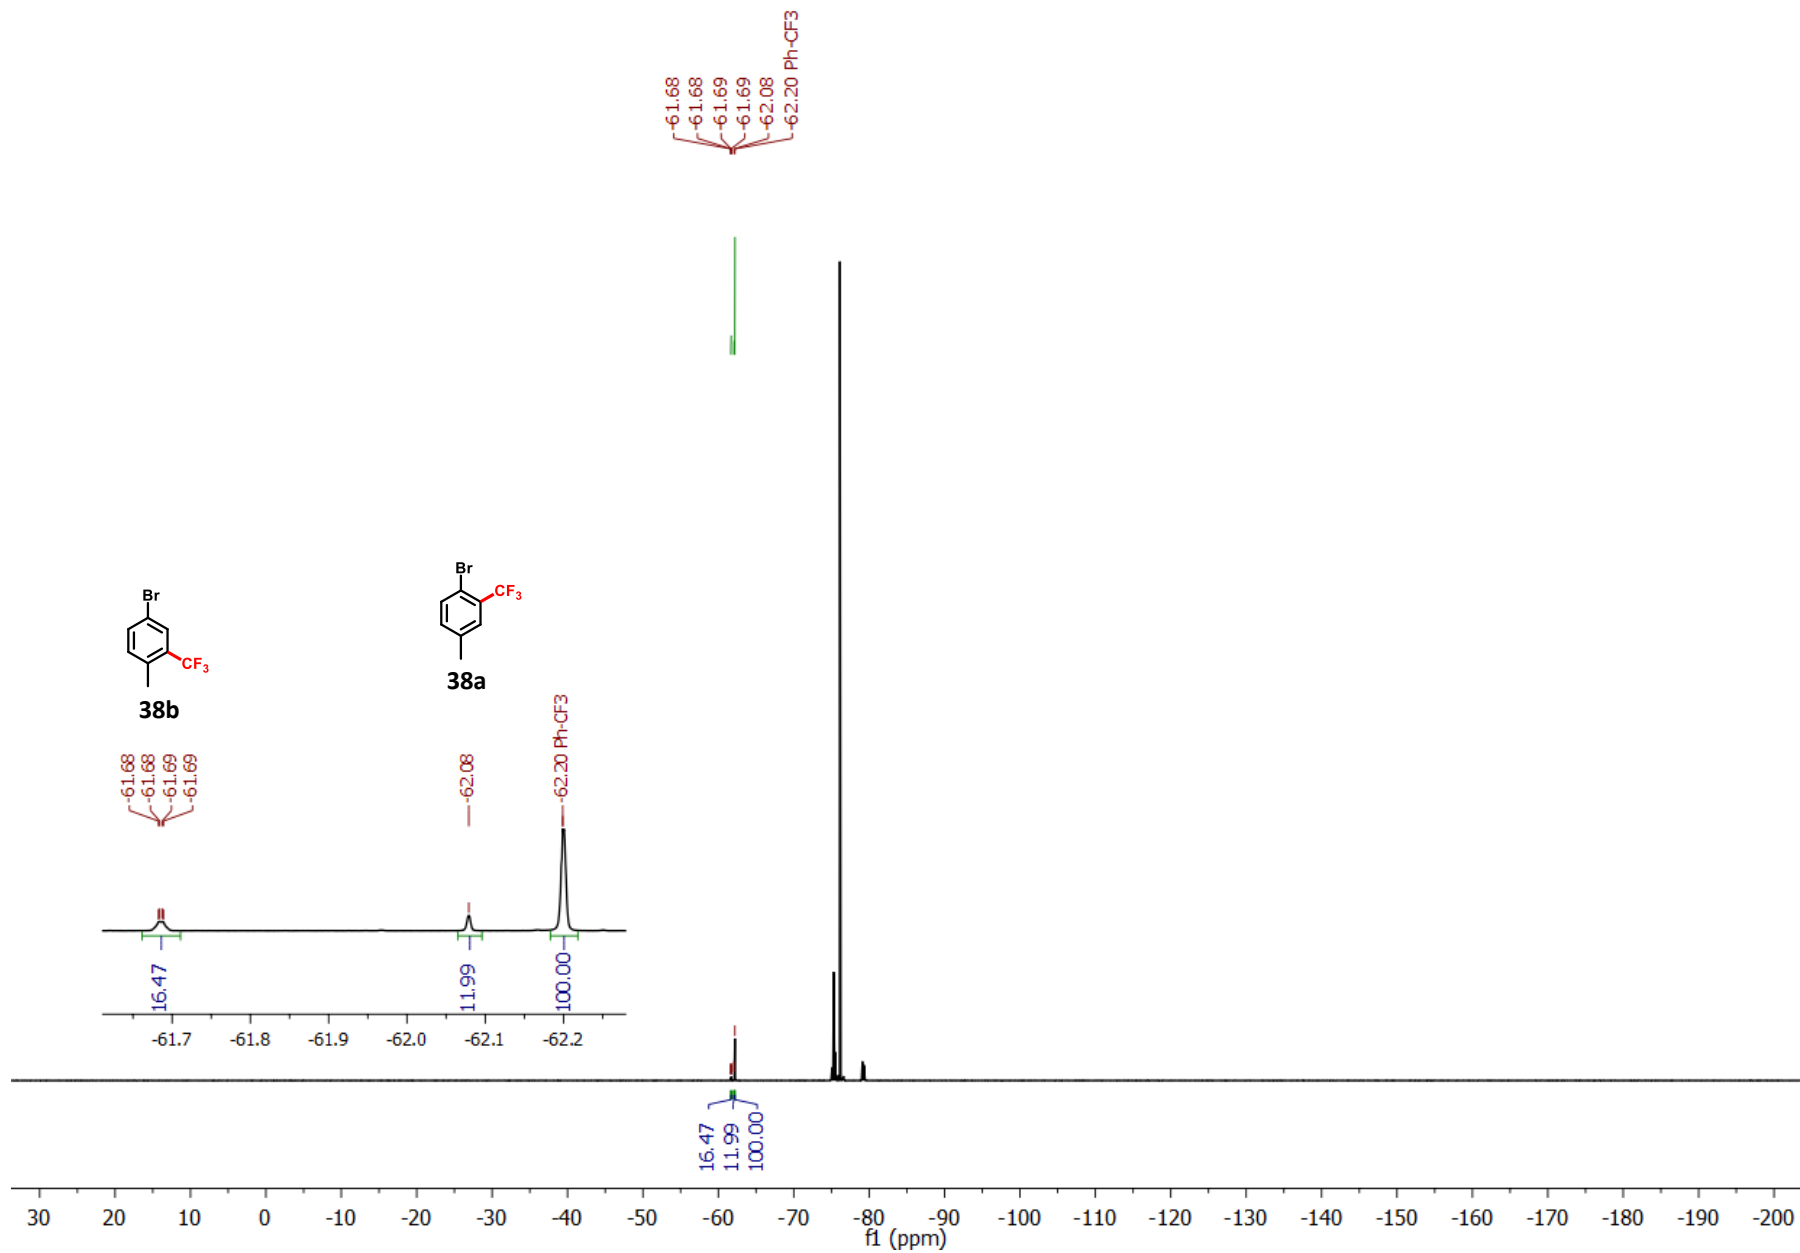

(39)  $^{19}\text{F}$  NMR (376 MHz,  $\text{DMSO-}d_6/\text{EtOAc}$ ) for trifluoromethylation of 2-bromoanisole

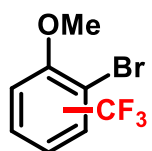

39  
The mixture  
of isomers

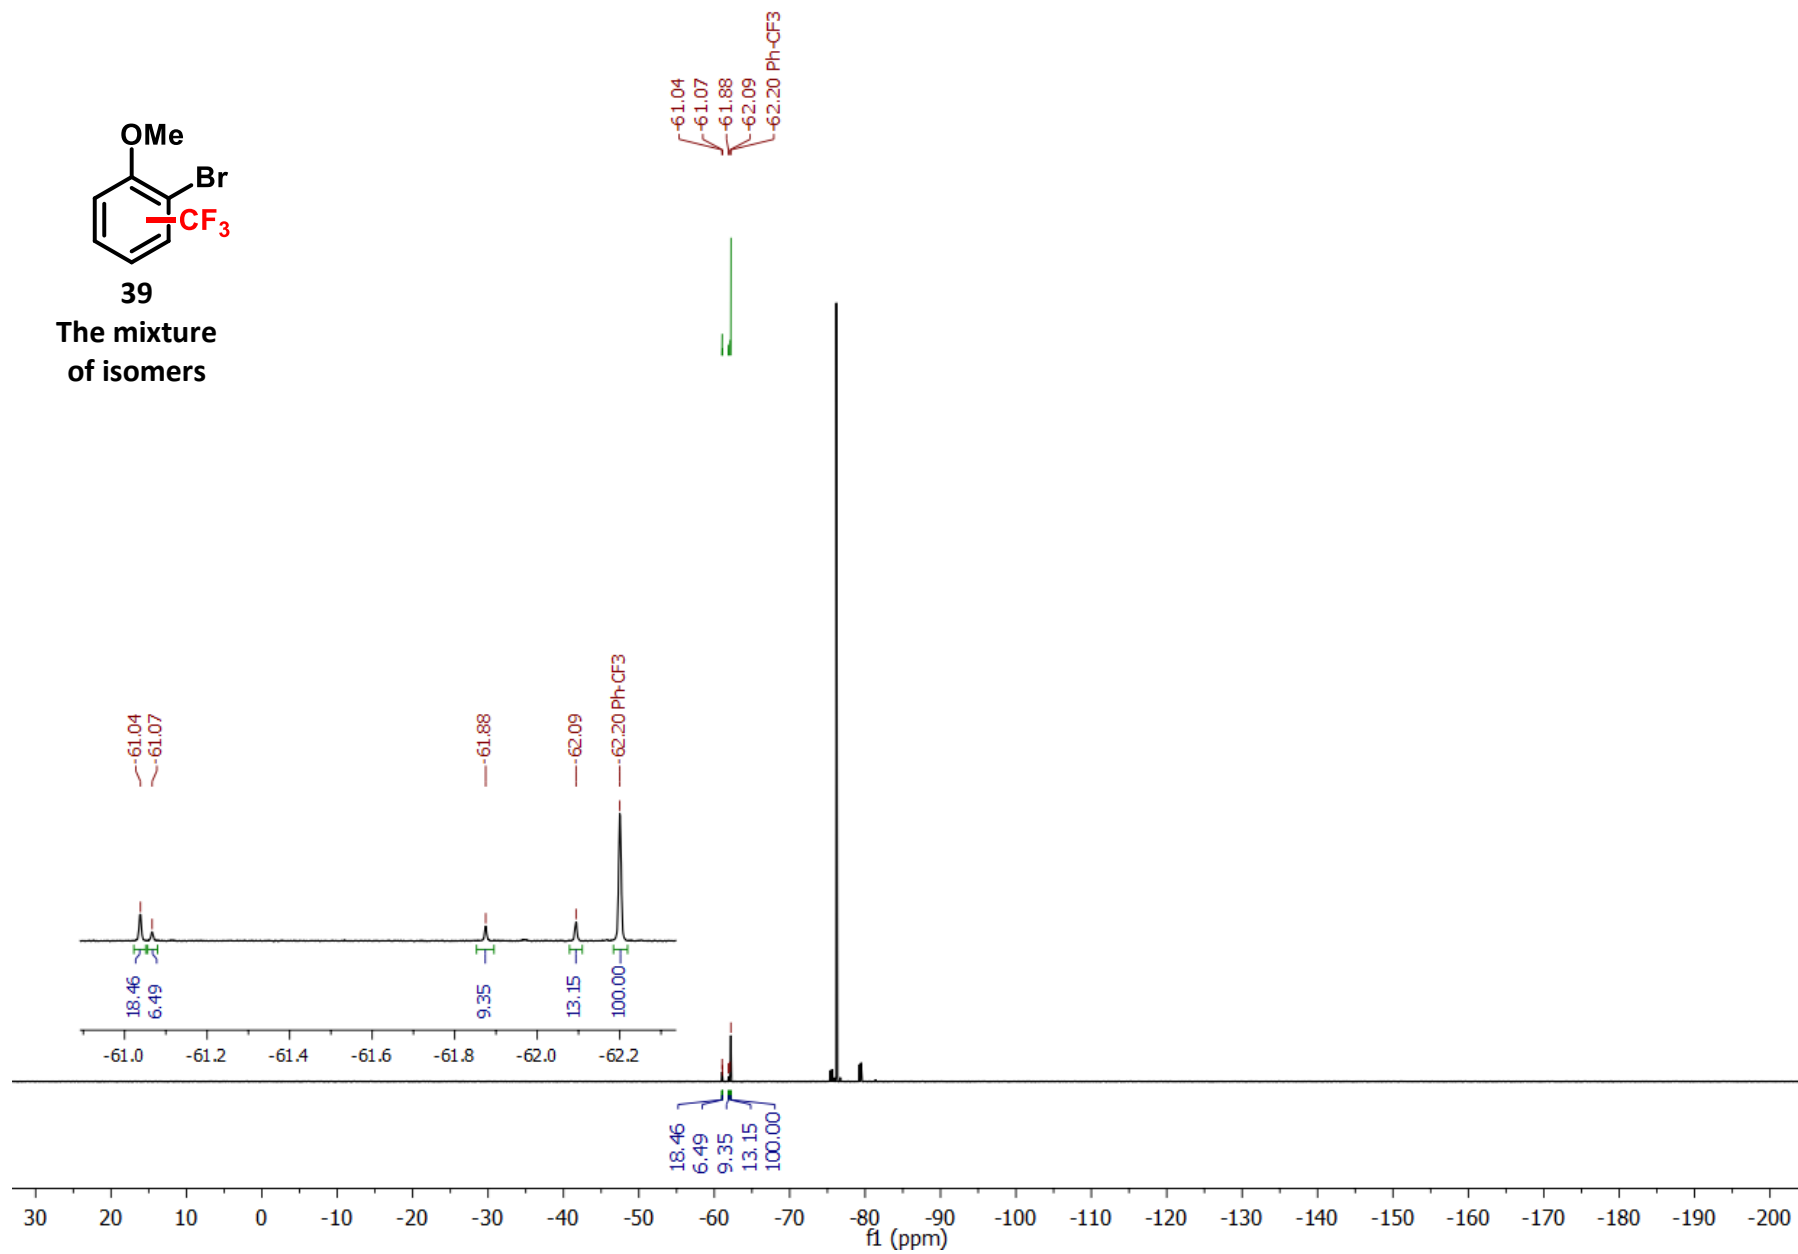

(40)  $^{19}\text{F}$  NMR (376 MHz,  $\text{DMSO-}d_6/\text{EtOAc}$ ) for trifluoromethylation of 3-bromoanisole

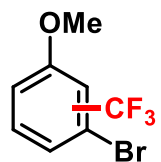

40  
The mixture  
of isomers

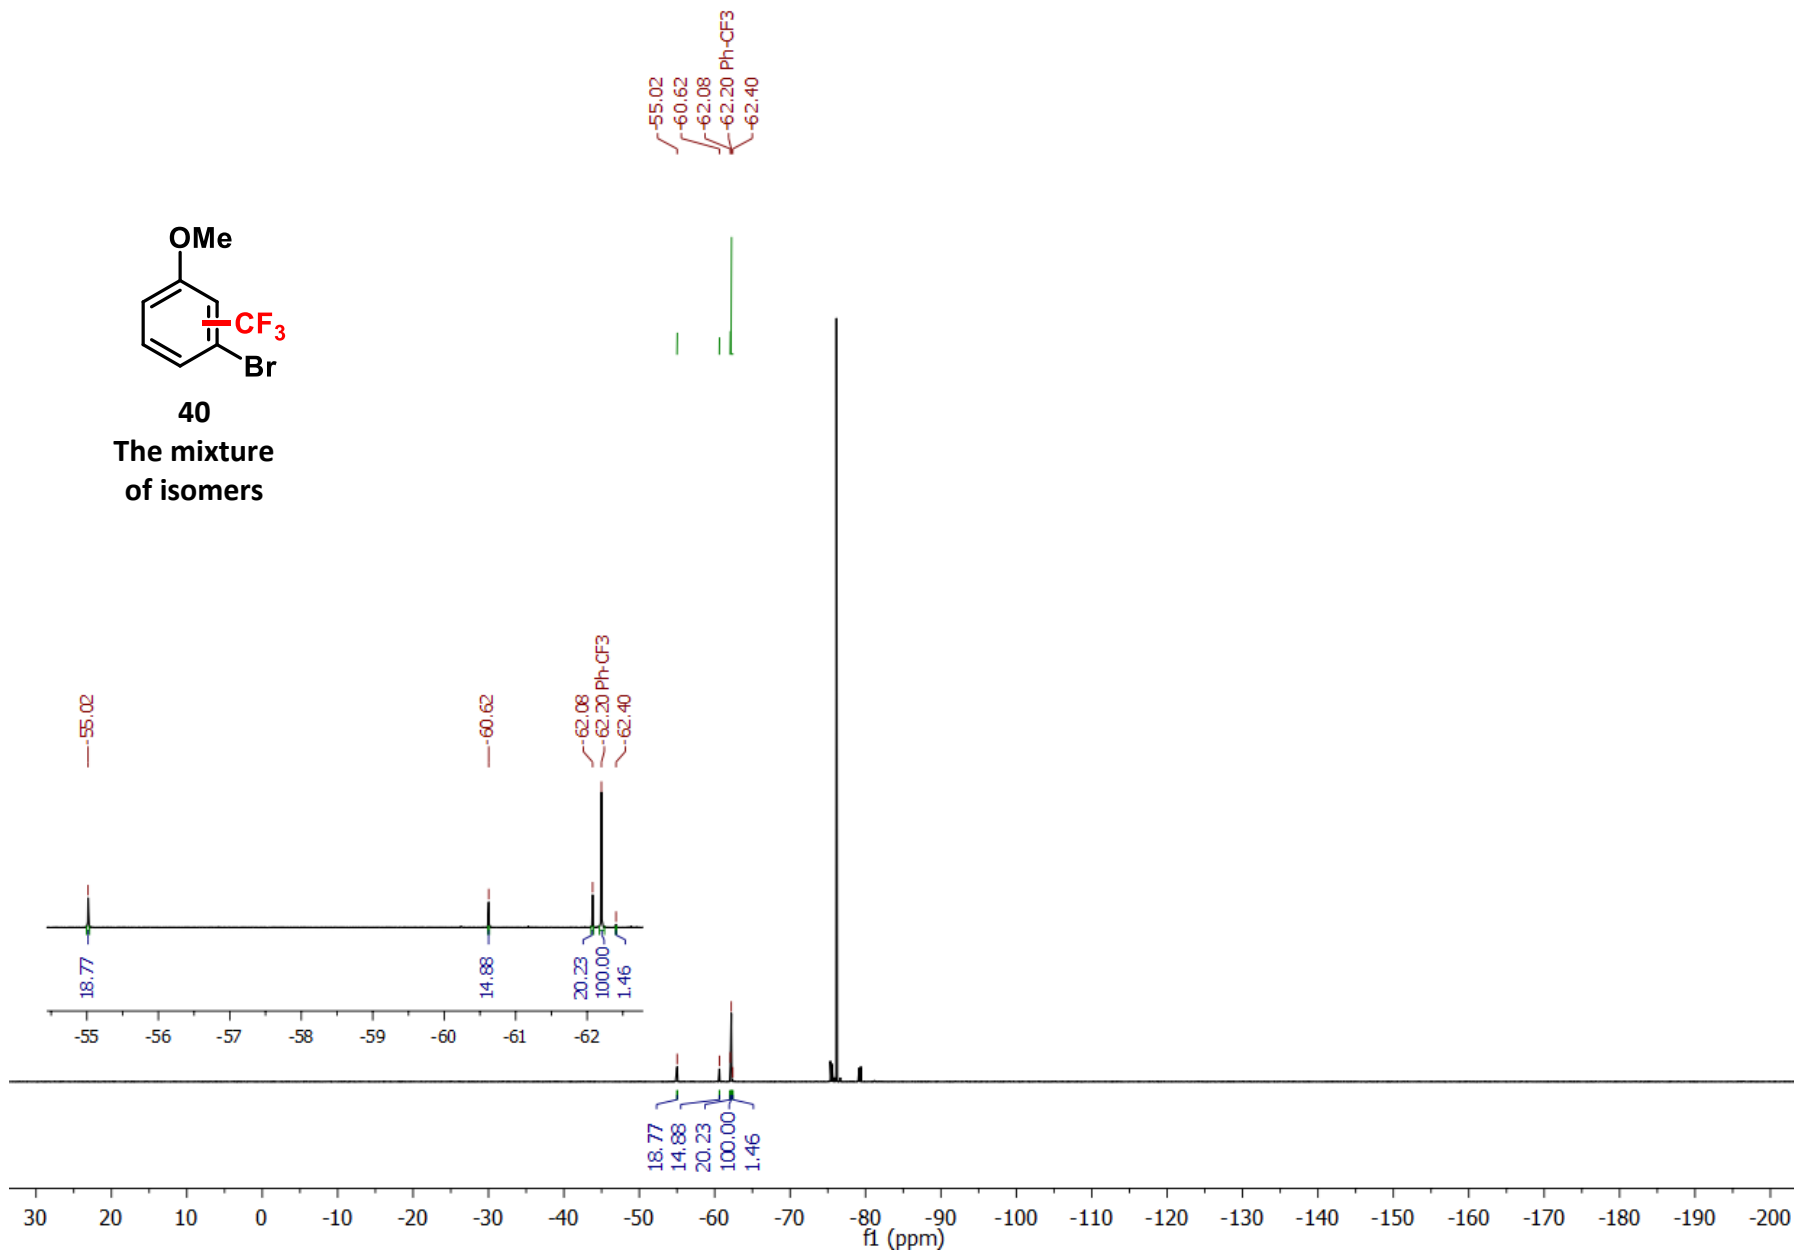

(41)  $^{19}\text{F}$  NMR (376 MHz,  $\text{DMSO-}d_6/\text{EtOAc}$ ) for trifluoromethylation of 4-bromoanisole

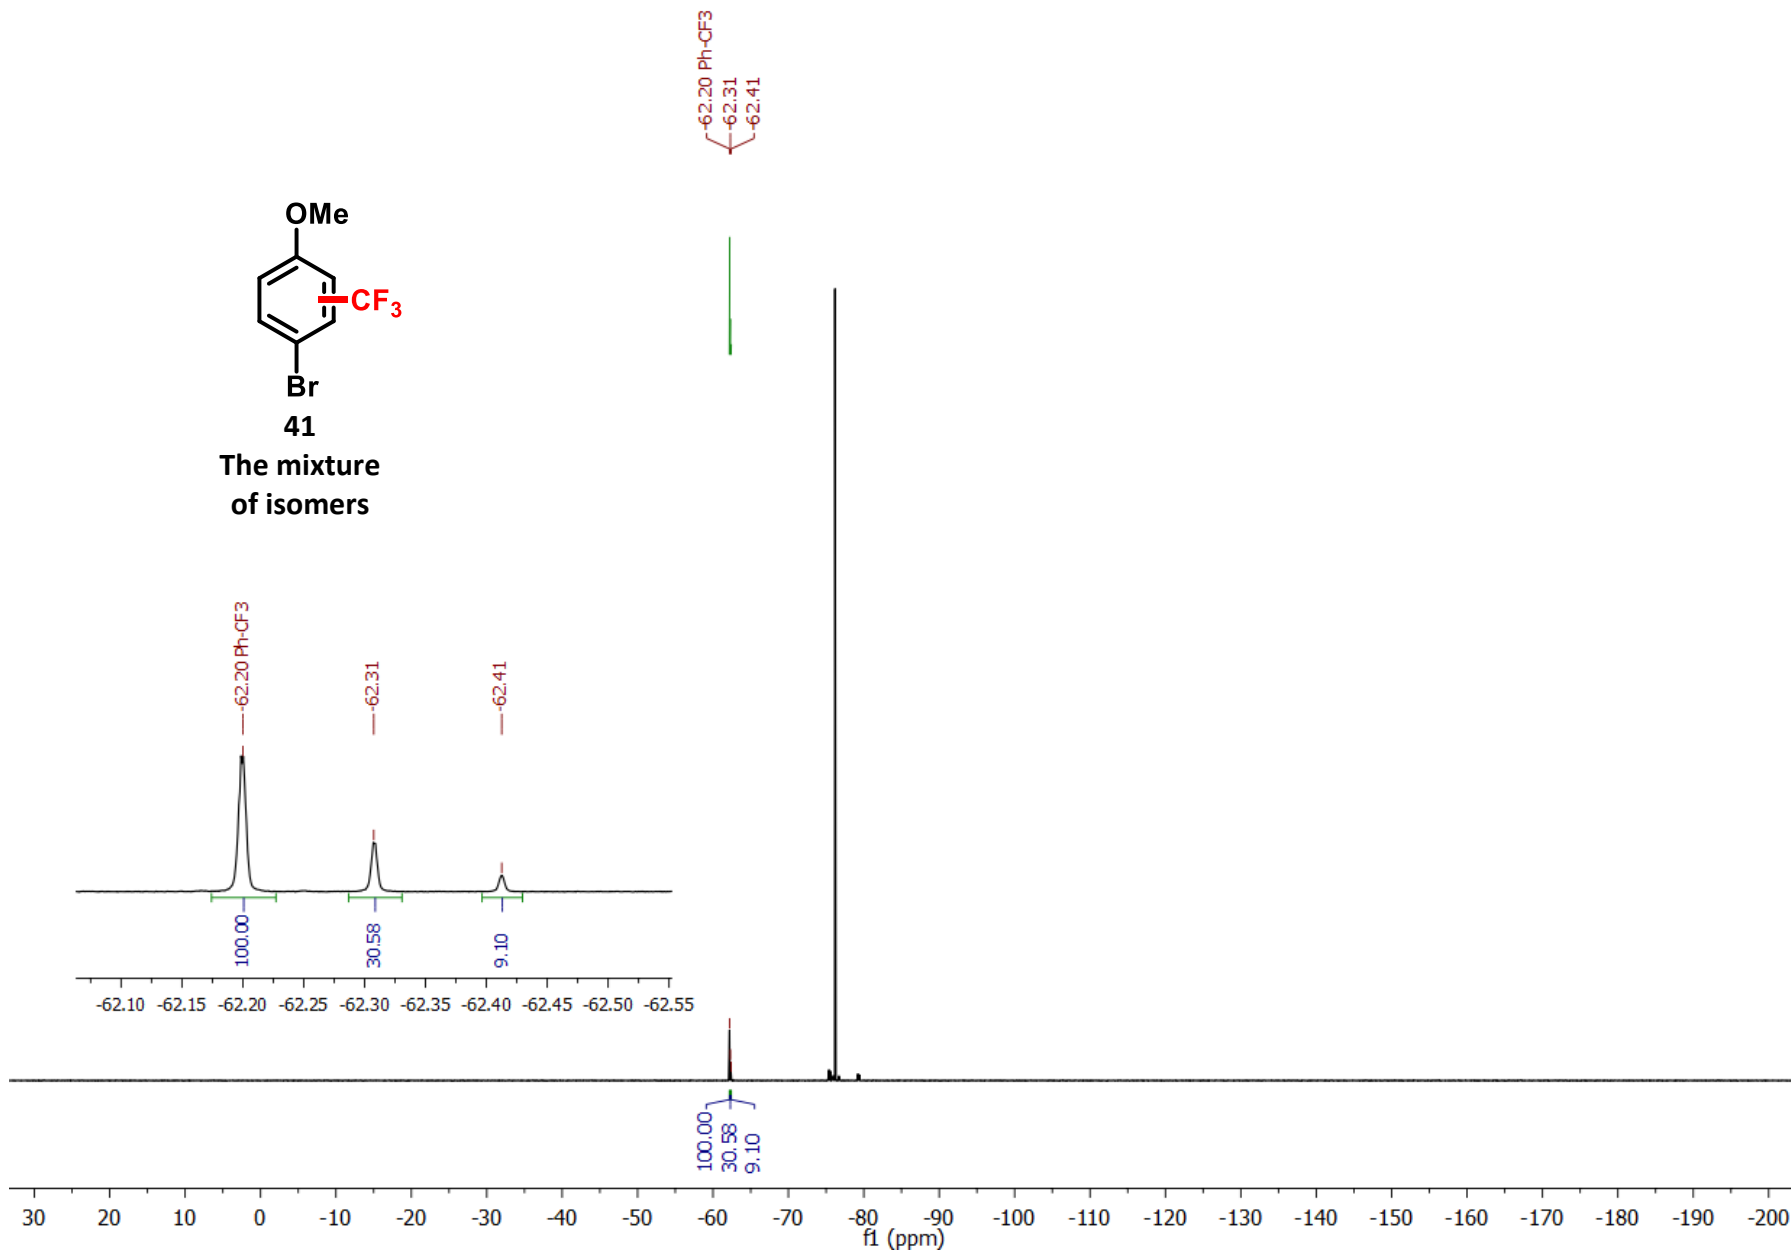

(42)  $^{19}\text{F}$  NMR (376 MHz,  $\text{DMSO-}d_6/\text{EtOAc}$ ) for trifluoromethylation of 4-bromo-1-methoxy-2-methylbenzene

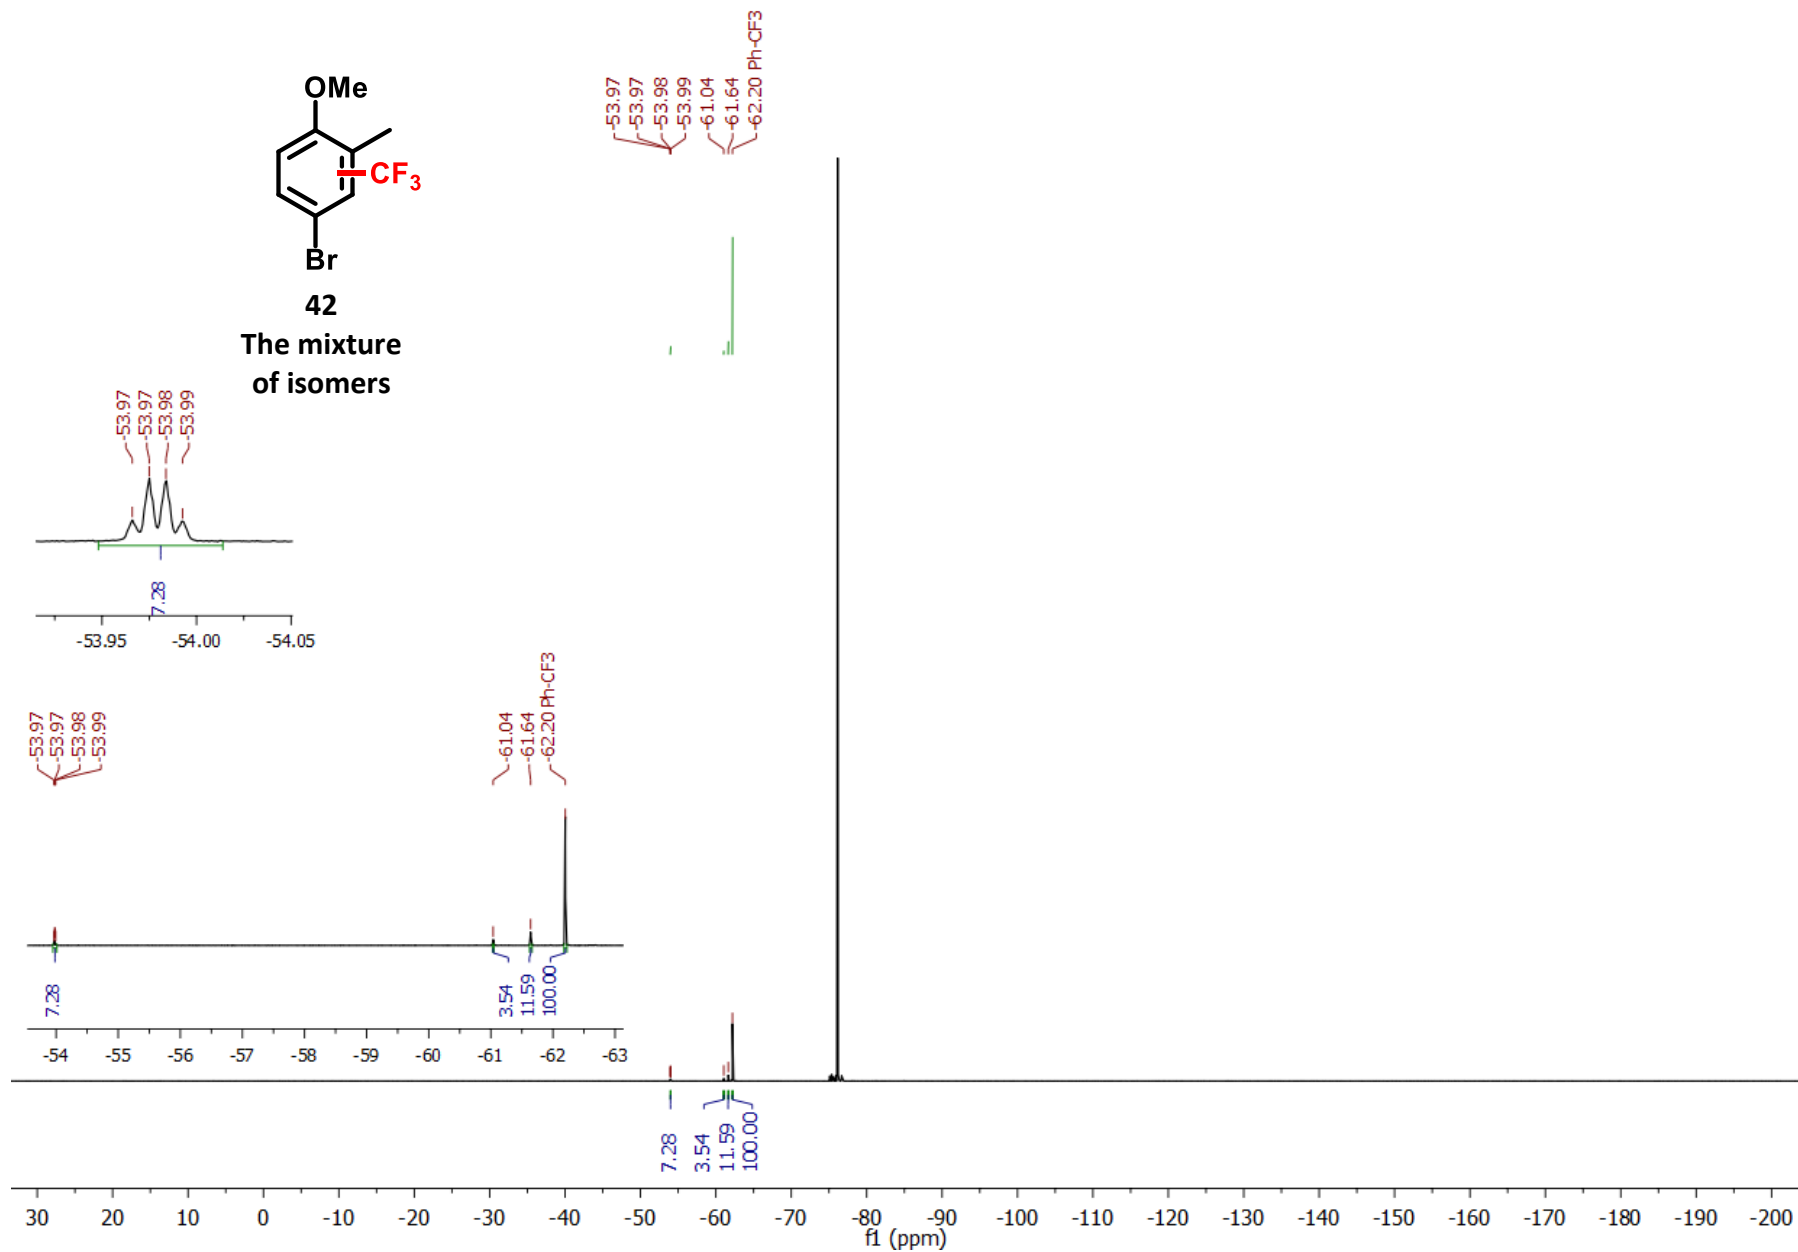

(43)  $^{19}\text{F}$  NMR (376 MHz,  $\text{DMSO-}d_6/\text{EtOAc}$ ) for trifluoromethylation of 1-bromo-4-methoxy-2-methylbenzene

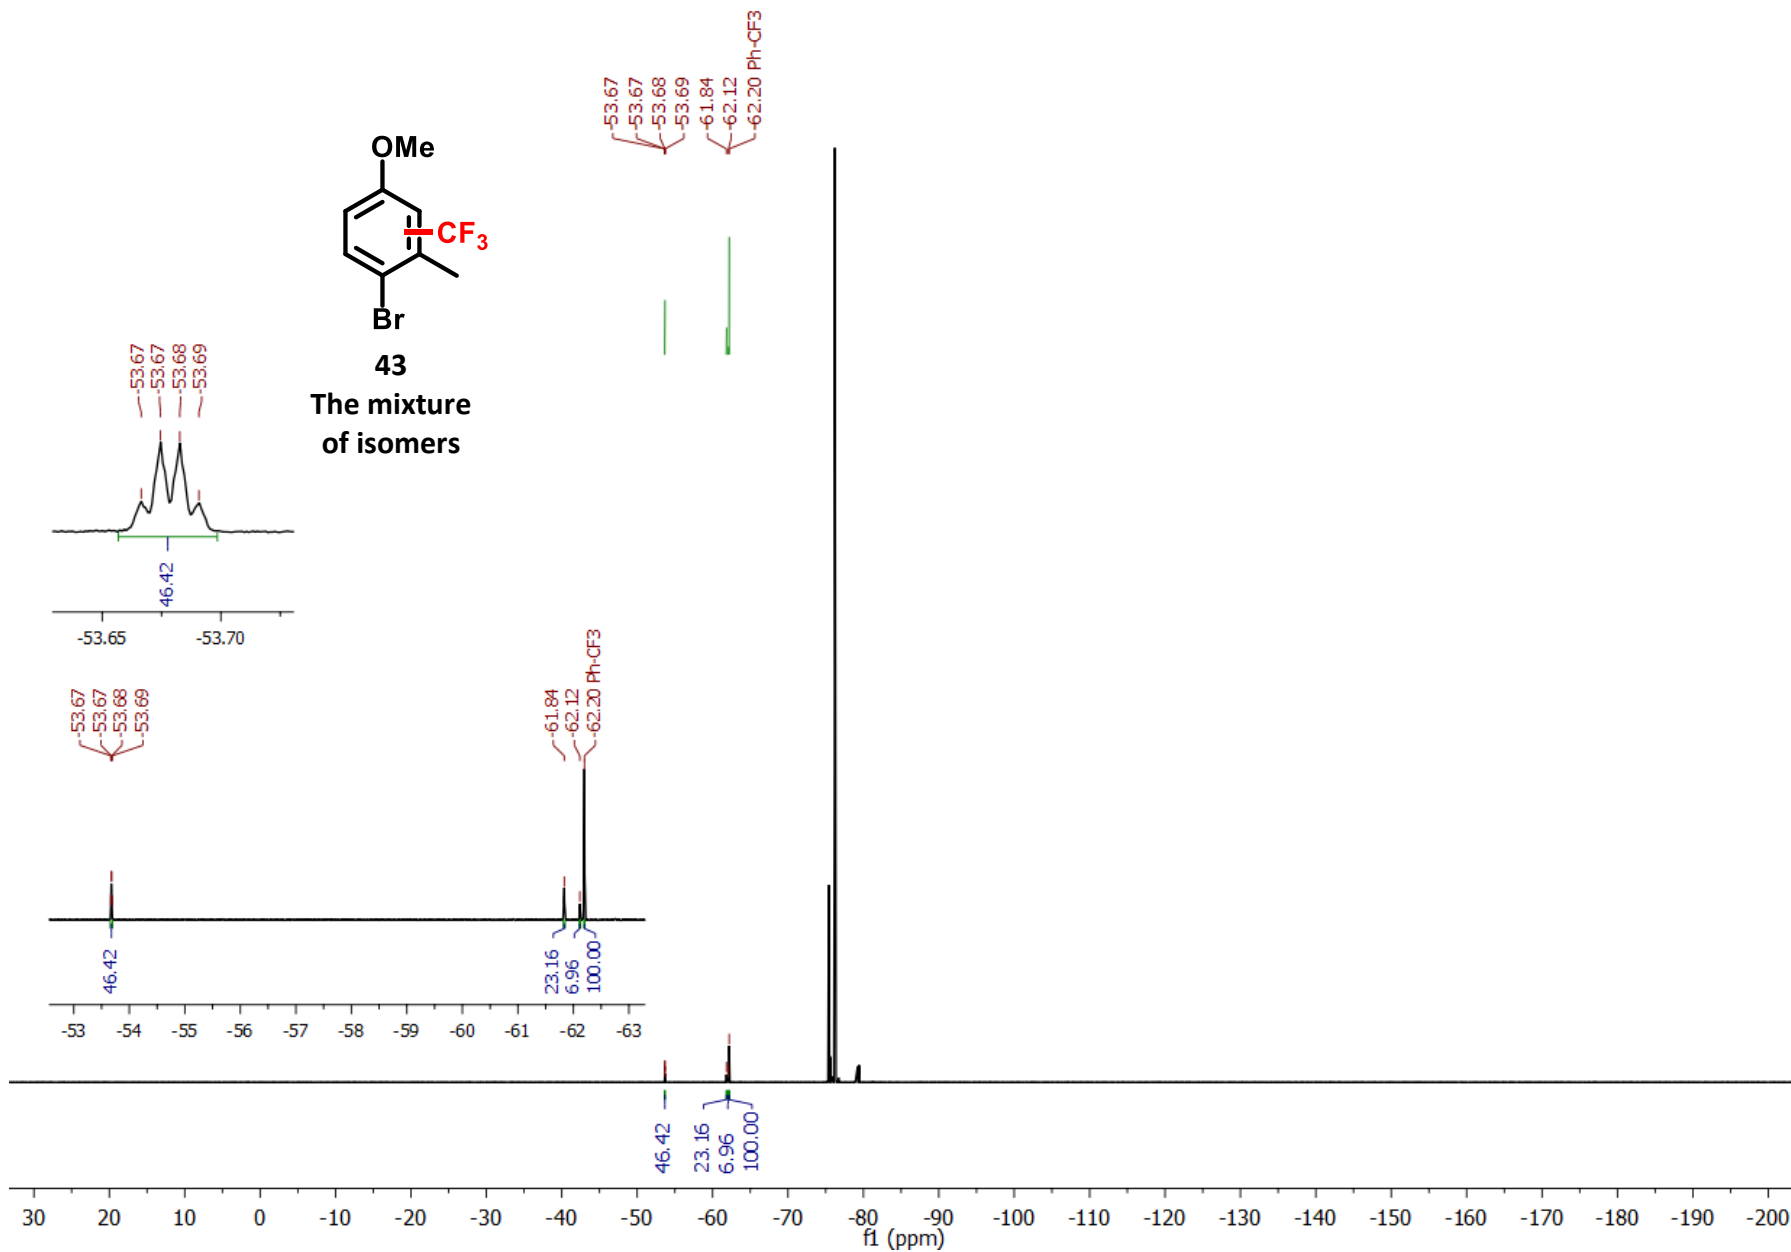

(44)  $^{19}\text{F}$  NMR (376 MHz,  $\text{DMSO-}d_6/\text{EtOAc}$ ) for trifluoromethylation of 5-Bromo-2-methoxy-1,3-dimethylbenzene

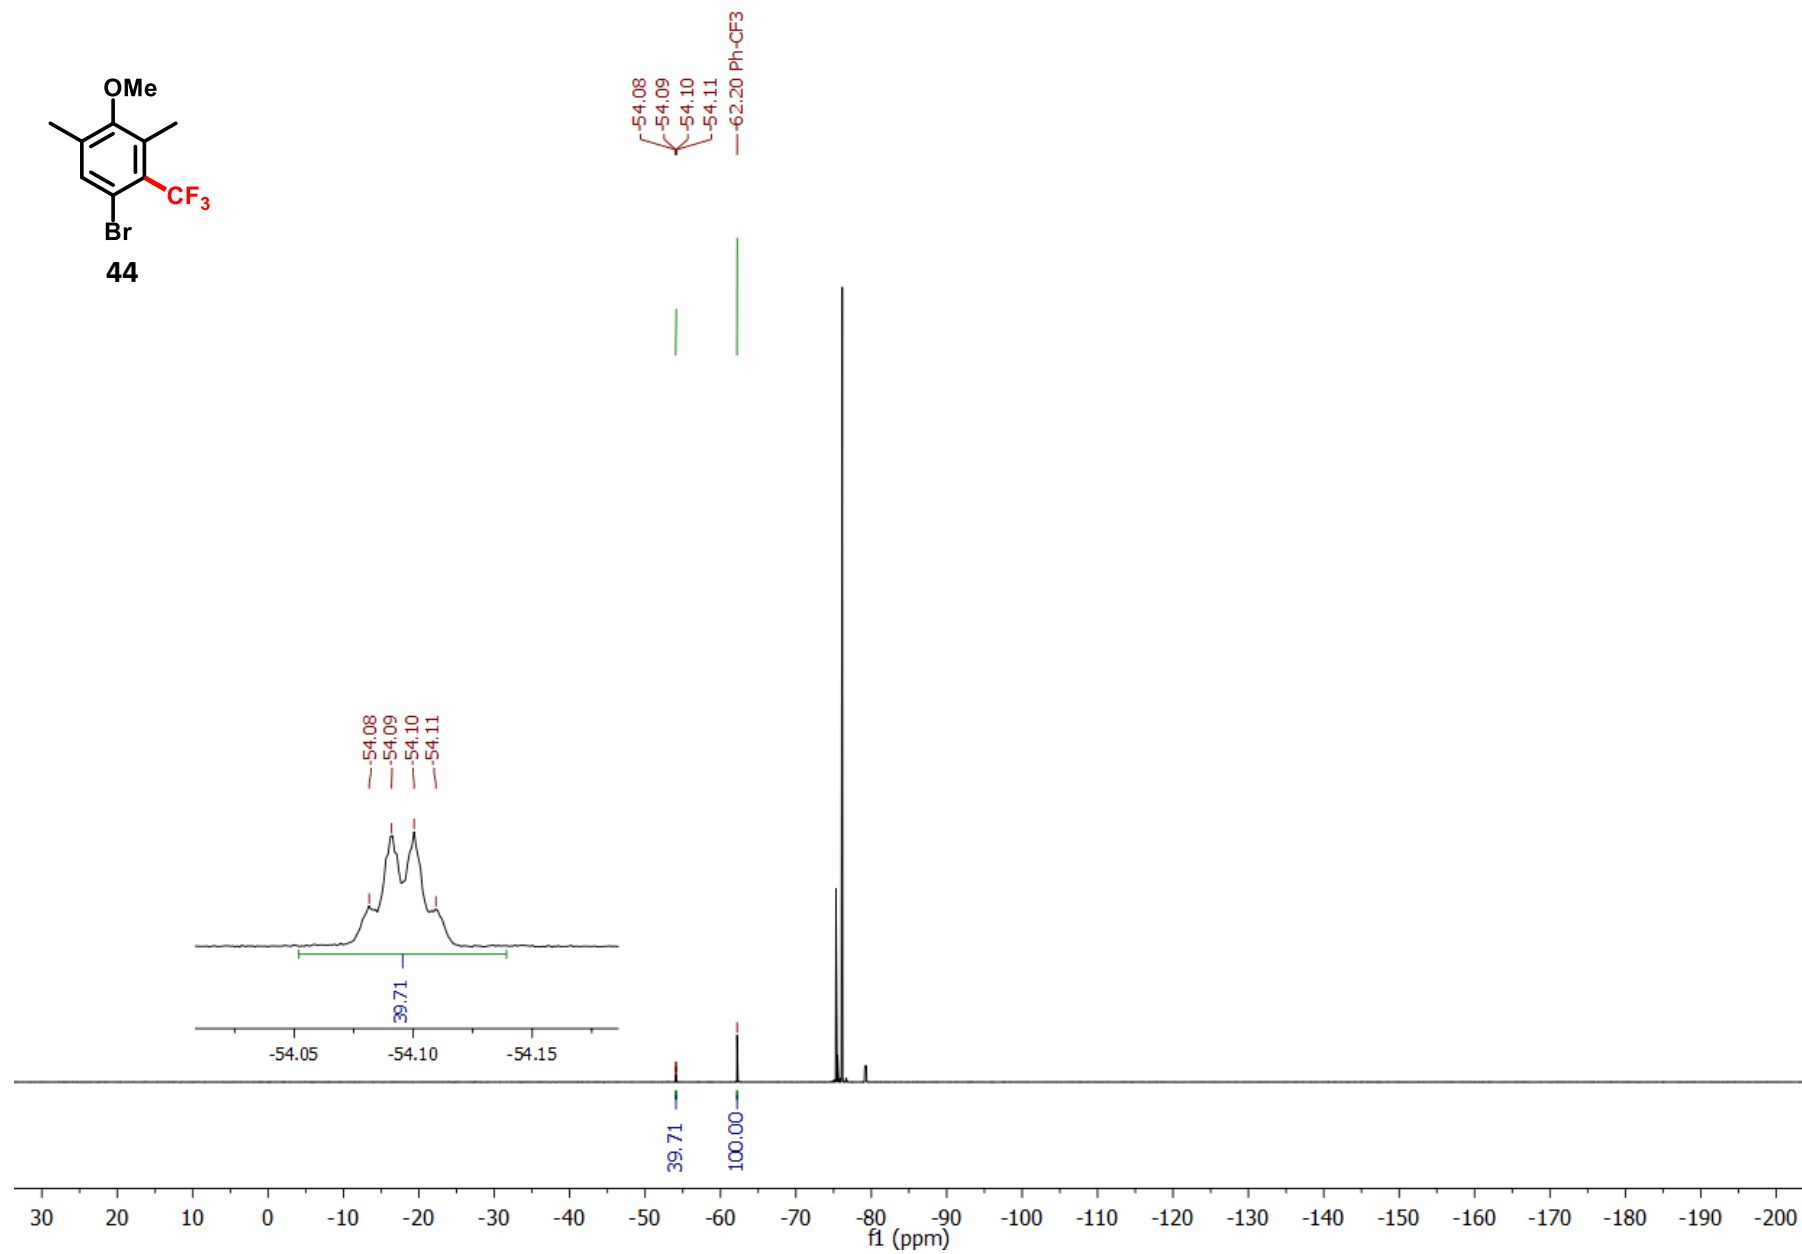

(44)  $^1\text{H}$  NMR (400 MHz,  $\text{CDCl}_3$ ) for 1-bromo-4-methoxy-3,5-dimethyl-2-(trifluoromethyl)benzene

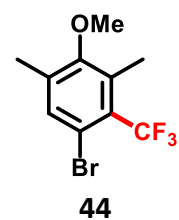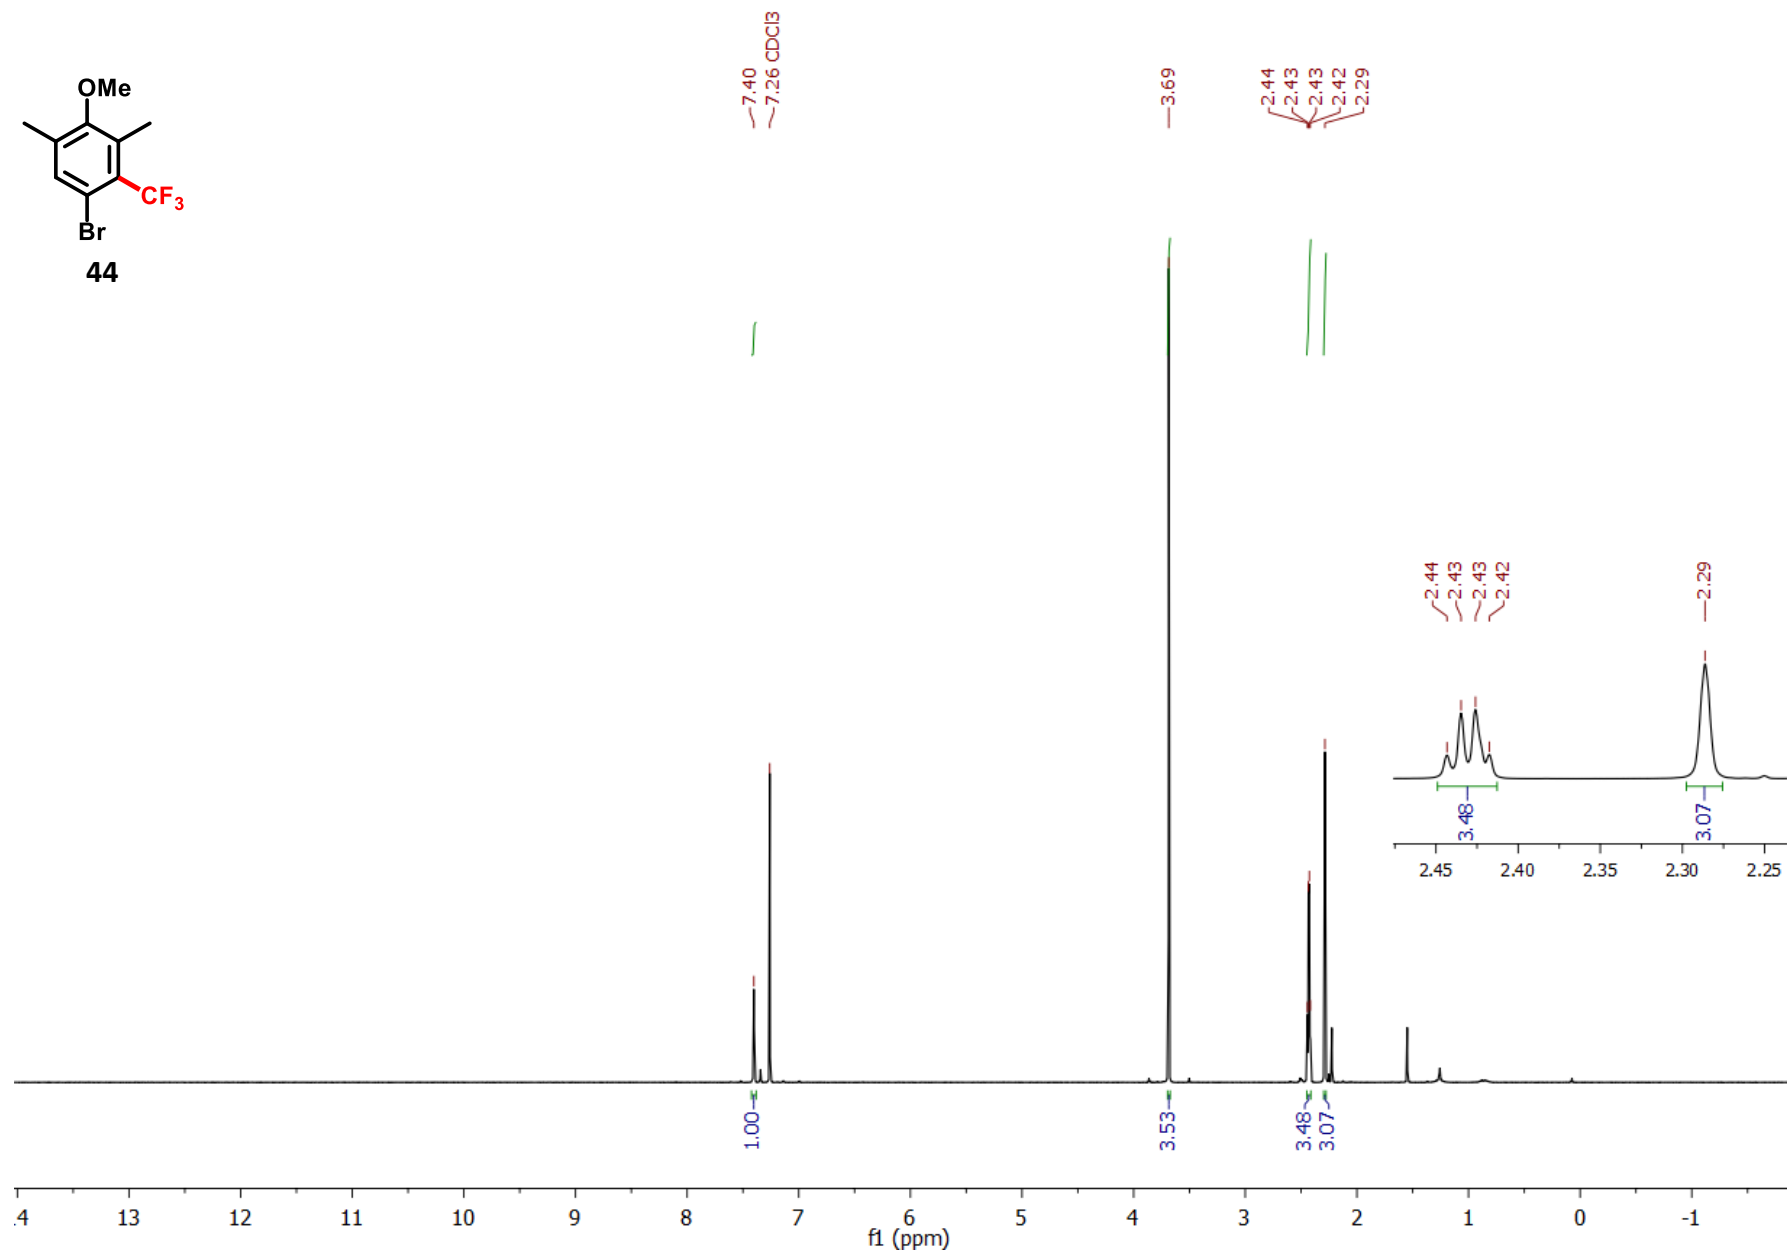

(44)  $^{19}\text{F}$  NMR (376 MHz,  $\text{CDCl}_3$ ) for 1-bromo-4-methoxy-3,5-dimethyl-2-(trifluoromethyl)benzene

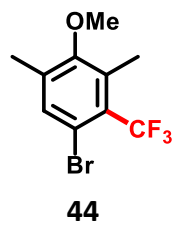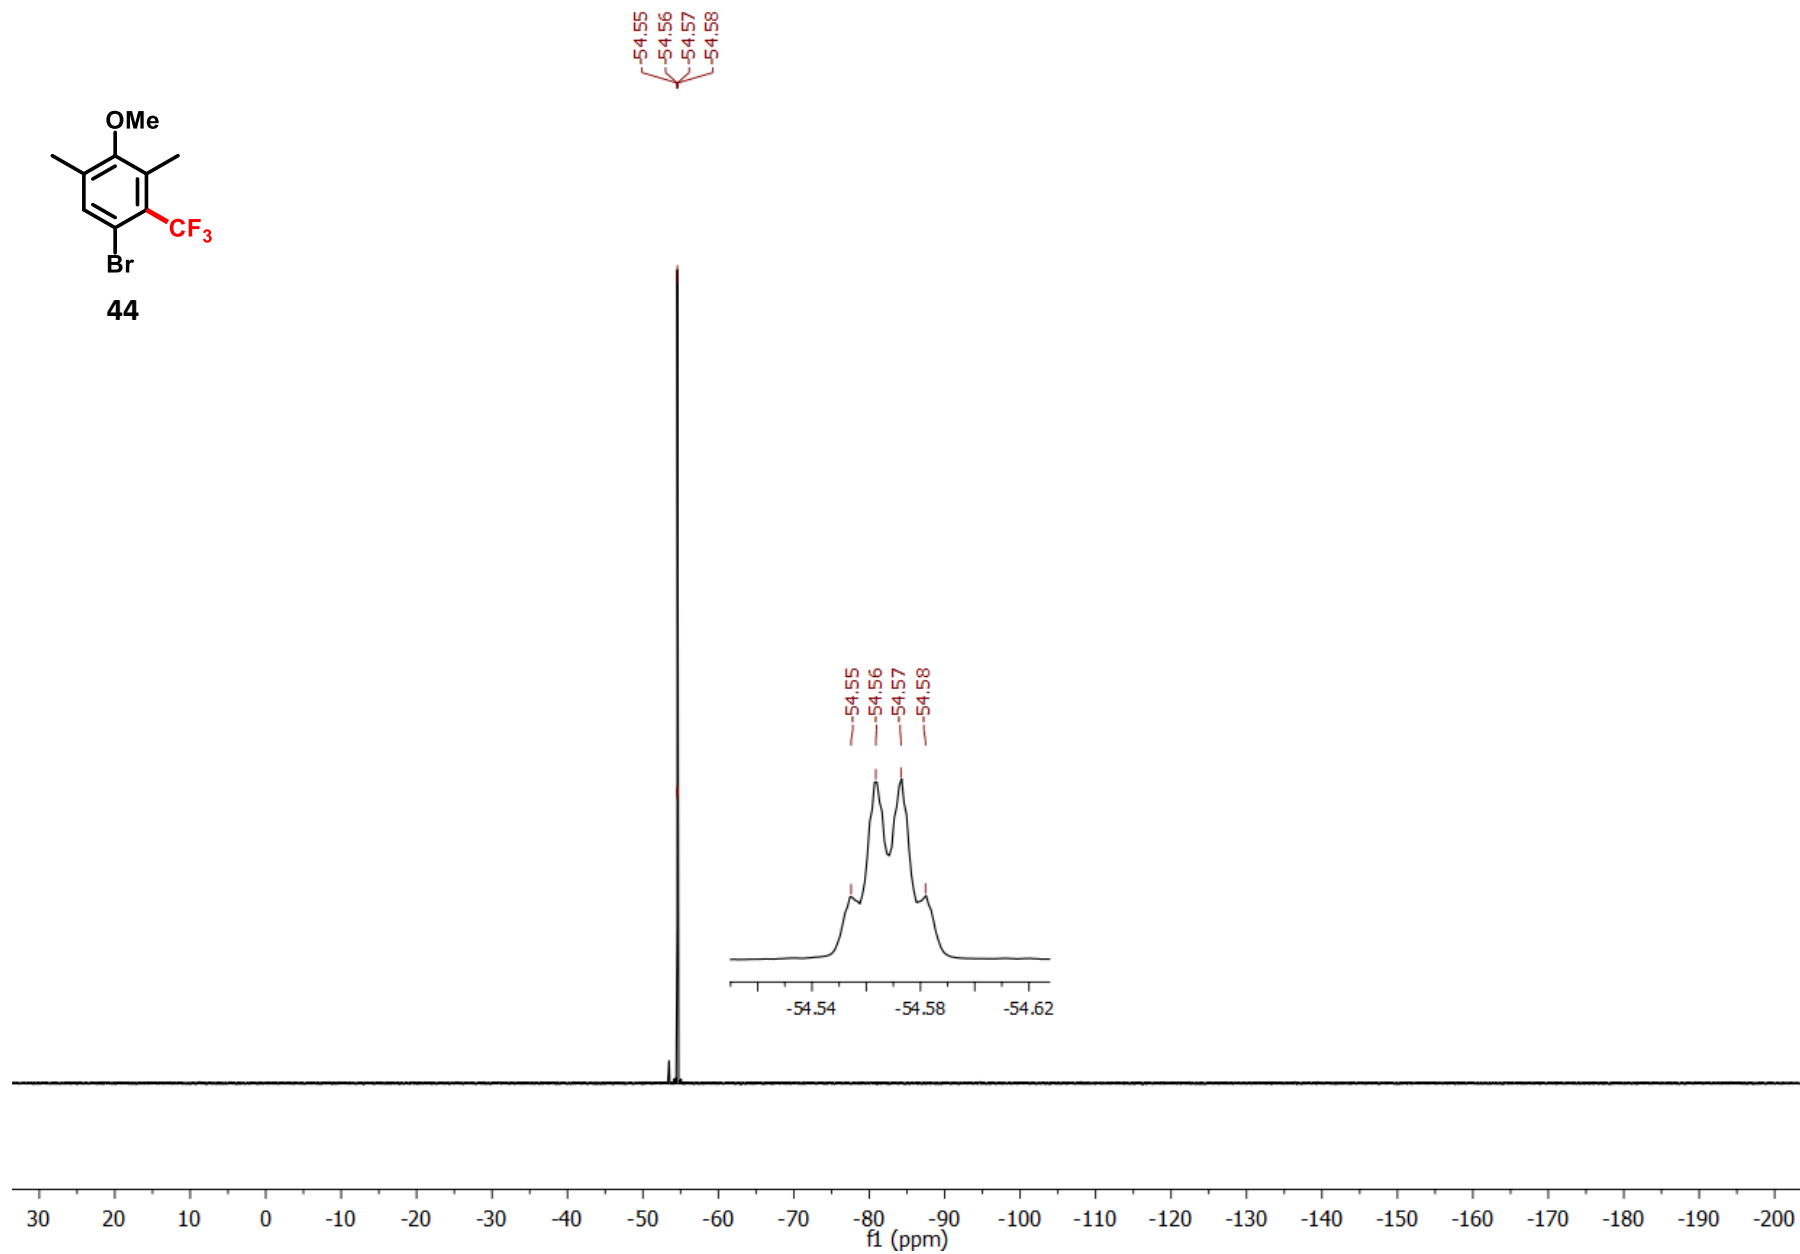

(44)  $^{13}\text{C}$  NMR (101 MHz,  $\text{CDCl}_3$ ) for 1-bromo-4-methoxy-3,5-dimethyl-2-(trifluoromethyl)benzene

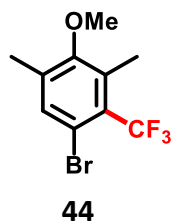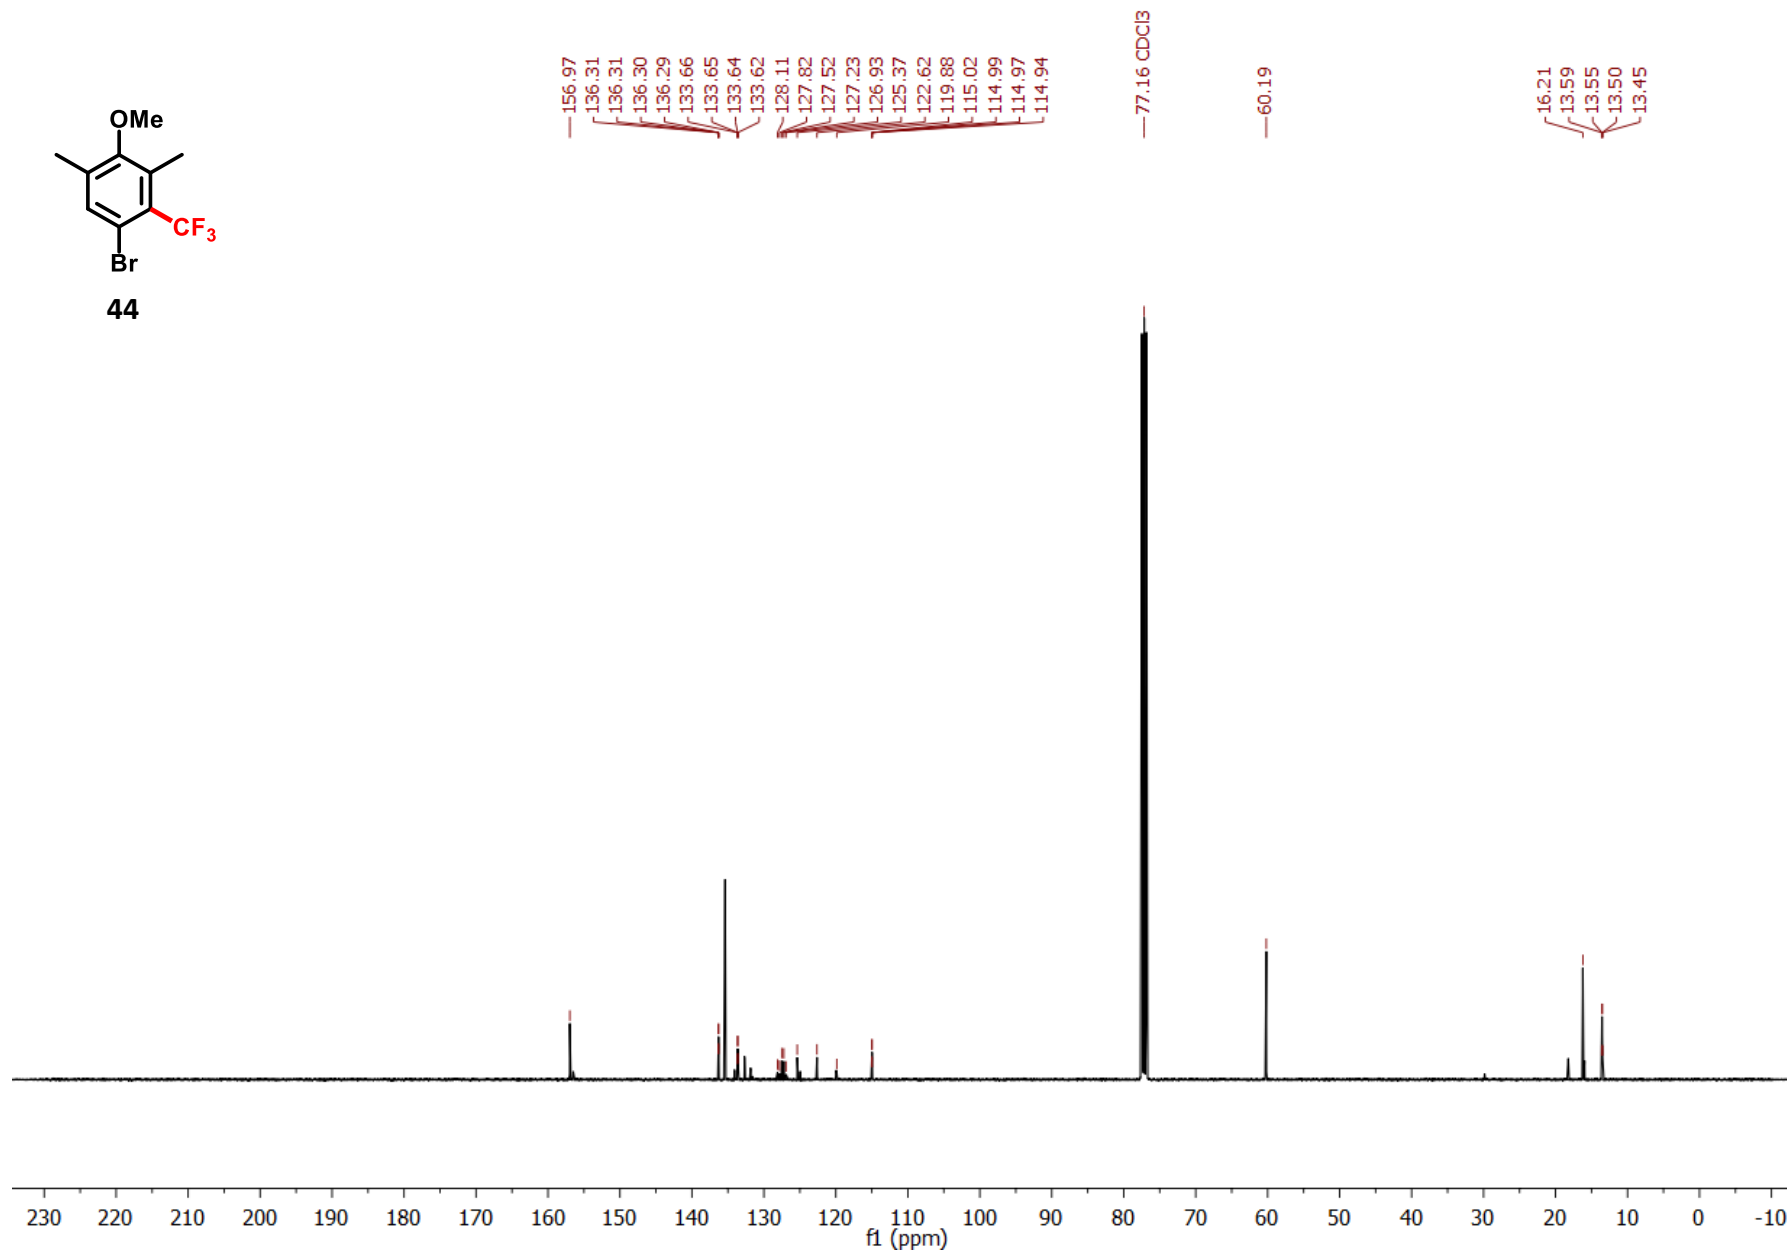

## 11. Computational data

DFT calculations were carried out with the ORCA 6.0 software package [45–52] using the TPSS0 functional with GRID3 integration and the D4 dispersion correction, together with the def2-SVP basis set for all atoms. Frequency calculations were performed using the PW6B95 functional (with GRID3 integration and D4 dispersion correction) for all structures to confirm whether they correspond to a minimum or a transition state (TS). Transition states were located using the NEB-TS algorithm implemented in ORCA 6.0. All structures and energies were optimized and calculated with the SMD solvent model for EtOAc to account for solvent effects. Gibbs free energy values are reported at 298 K, unless stated otherwise. TDDFT calculations were carried out to optimize the geometry of the T1 state for PS at the TPSS0/def2-SVP level of theory (with GRID3 integration and D4 dispersion correction).

### PS (3DPAFIPN)

Charge: 0

Multiplicity: 1

Number of Imaginary Frequencies: 0

Final single point energy -2069.682594077043 Eh

C -0.86934 1.35052 -0.82751

C -1.57788 0.12790 -0.80755

C -1.06662 -0.93376 -1.55272

C 0.10659 -0.84378 -2.30064

C 0.80662 0.38394 -2.28621

C 0.32203 1.48131 -1.55770

N 1.02226 2.69779 -1.55867

F -1.72892 -2.08522 -1.55009

N -2.74866 -0.02886 -0.07049

N 0.55845 -1.93703 -3.03476

C 2.33546 2.72436 -1.03852

C 0.38779 3.84532 -2.08482

C -3.89524 -0.56989 -0.69570

C -2.74647 0.31770 1.30305

C 0.85838 -1.76630 -4.40861

C 0.66626 -3.19899 -2.40660

C -4.74906 -1.43110 0.00167

C -5.86910 -1.95695 -0.63289

C -6.14038 -1.65076 -1.96654

C -5.28178 -0.80059 -2.66091

C -4.16968 -0.25190 -2.02988

C -3.84882 0.95924 1.87599

C -3.81897 1.31225 3.21998

C -2.69065 1.05025 3.99801

C -1.59216 0.41631 3.42163  
C -1.62036 0.03773 2.08256  
C 1.08717 -3.27498 -1.07496  
C 1.17207 -4.51138 -0.44225  
C 0.86056 -5.68118 -1.13263  
C 0.45107 -5.60188 -2.46380  
C 0.34244 -4.37011 -3.09980  
C 1.96627 -2.40145 -4.97789  
C 2.25829 -2.20426 -6.32239  
C 1.46687 -1.36252 -7.10483  
C 0.36730 -0.72708 -6.53214  
C 0.05253 -0.93548 -5.19243  
C -0.48395 3.71651 -3.17163  
C -1.14531 4.83513 -3.67046  
C -0.93142 6.09182 -3.10880  
C -0.05472 6.21804 -2.03066  
C 0.59469 5.10476 -1.51040  
C 3.31810 3.53718 -1.61527  
C 4.60985 3.53151 -1.10224  
C 4.94617 2.70585 -0.02891  
C 3.96913 1.88882 0.53536  
C 2.66681 1.90228 0.04416  
C 2.01996 0.52226 -3.01889  
N 3.00810 0.64561 -3.60881  
C -1.35821 2.47114 -0.09718  
N -1.74799 3.39025 0.48843  
H -4.53159 -1.69078 1.03520  
H -6.52825 -2.62602 -0.08164  
H -7.01490 -2.07142 -2.45971  
H -5.48430 -0.54760 -3.70057  
H -3.51377 0.42917 -2.56943  
H -4.71802 1.19127 1.26472  
H -4.67954 1.81500 3.65867  
H -2.66911 1.33982 5.04712  
H -0.70841 0.19998 4.01992  
H -0.76893 -0.47404 1.63732  
H 1.35313 -2.36543 -0.53891  
H 1.49919 -4.55851 0.59538  
H 0.93664 -6.64799 -0.63820  
H 0.19750 -6.50819 -3.01183

H 0.00236 -4.31313 -4.13132  
H 2.60156 -3.03525 -4.36332  
H 3.12493 -2.69914 -6.75804  
H 1.70772 -1.20331 -8.15441  
H -0.26226 -0.07317 -7.13361  
H -0.81760 -0.45338 -4.75031  
H -0.64067 2.74050 -3.62715  
H -1.82330 4.72099 -4.51505  
H -1.44427 6.96635 -3.50527  
H 0.11280 7.19281 -1.57476  
H 1.25430 5.20686 -0.65183  
H 3.07083 4.16188 -2.47037  
H 5.36667 4.16688 -1.56005  
H 5.96218 2.69900 0.36177  
H 4.21491 1.24204 1.37637  
H 1.90367 1.27541 0.50155

**PS\* (3DPAFIPN\*)**

Charge: 0

Multiplicity: 3

Number of Imaginary Frequencies: 0

Final single point energy -2069.682594077043 Eh

C 1.21220 0.71223 -0.34089  
C 1.14002 -0.73671 -0.39459  
C -0.02770 -1.39618 -0.00709  
C -1.17718 -0.64124 0.40001  
C -1.16607 0.80751 0.29750  
C 0.01998 1.42043 -0.04807  
C 2.21776 -1.45601 -0.96714  
C -2.27784 -1.26874 1.01207  
N 3.11617 -2.01270 -1.45153  
N -3.20751 -1.75532 1.52173  
N 2.42099 1.38978 -0.52085  
N -2.33571 1.55444 0.53464  
N -0.09543 -2.79337 0.00714  
F 0.06480 2.74516 -0.07374  
C 2.50958 2.40023 -1.49389  
C 3.31250 3.53539 -1.27980  
C 1.75529 2.29328 -2.67543  
C 3.36243 4.53447 -2.24202

H 3.86972 3.63894 -0.35169  
C 1.81399 3.30233 -3.62711  
H 1.14607 1.40748 -2.84300  
C 2.61689 4.42600 -3.41851  
H 3.97730 5.41546 -2.06517  
H 1.23715 3.20593 -4.54543  
H 2.65928 5.21495 -4.16734  
C 3.53270 1.02961 0.26820  
C 4.82859 1.01962 -0.27650  
C 3.33212 0.62975 1.59970  
C 5.90310 0.63182 0.51186  
H 4.98100 1.29025 -1.31874  
C 4.41689 0.23949 2.37488  
H 2.32895 0.65392 2.01989  
C 5.70546 0.23989 1.83840  
H 6.90321 0.61740 0.08181  
H 4.25579 -0.05693 3.41008  
H 6.55237 -0.06797 2.44912  
C -3.43769 1.36370 -0.33571  
C -4.75132 1.33915 0.15528  
C -3.21614 1.14677 -1.70204  
C -5.81737 1.12660 -0.71290  
H -4.93420 1.47785 1.21868  
C -4.28927 0.91729 -2.55990  
H -2.19888 1.16441 -2.08912  
C -5.59572 0.91205 -2.07405  
H -6.83161 1.11060 -0.31574  
H -4.09897 0.75287 -3.61989  
H -6.43343 0.73762 -2.74732  
C -2.36769 2.47059 1.60495  
C -1.58709 2.24034 2.74882  
C -3.14150 3.64064 1.53842  
C -1.58505 3.15631 3.79639  
H -0.98552 1.33579 2.81562  
C -3.13978 4.54298 2.59743  
H -3.73642 3.84827 0.65187  
C -2.36325 4.31191 3.73328  
H -0.97456 2.95552 4.67608  
H -3.74464 5.44620 2.52434  
H -2.36277 5.02445 4.55644

C -1.16342 -3.43835 -0.65926  
C -1.72529 -4.61420 -0.14037  
C -1.67770 -2.88673 -1.84131  
C -2.78387 -5.22400 -0.80161  
H -1.34274 -5.03497 0.78666  
C -2.74971 -3.49820 -2.48488  
H -1.22711 -1.98850 -2.25872  
C -3.30523 -4.66923 -1.97284  
H -3.21838 -6.13278 -0.38788  
H -3.14264 -3.06023 -3.40114  
H -4.13970 -5.14883 -2.48161  
C 0.91409 -3.54901 0.65777  
C 1.40366 -3.12566 1.90023  
C 1.42182 -4.71559 0.07175  
C 2.39537 -3.86028 2.54218  
H 0.99436 -2.23067 2.36436  
C 2.40207 -5.45066 0.73028  
H 1.05759 -5.03544 -0.90206  
C 2.89639 -5.02689 1.96410  
H 2.76706 -3.52535 3.50945  
H 2.79401 -6.35411 0.26548  
H 3.66795 -5.60282 2.47239

## TFAA

Charge: 0

Multiplicity: 1

Number of Imaginary Frequencies: 0

Final single point energy -977.491910351521 Eh

C -6.93403 -0.11859 0.24107  
C -5.80327 0.81843 -0.21637  
F -6.80212 -0.39126 1.53409  
F -6.88661 -1.25898 -0.43730  
F -8.10191 0.45797 0.03692  
O -5.95762 1.88827 -0.69134  
O -4.61717 0.17925 -0.00205  
C -3.41319 0.81907 -0.04853  
O -3.22802 1.98505 -0.03531  
C -2.30947 -0.25171 -0.08401  
F -2.46059 -1.02357 -1.15383  
F -2.37612 -1.01482 1.00070

F -1.12633 0.32789 -0.13207

### TFAA<sup>+-</sup>

Charge: -1

Multiplicity: 2

Number of Imaginary Frequencies: 0

Final single point energy -977.578110825612 Eh

C -6.91891 -0.12530 0.15329

C -5.60825 0.68553 0.19808

F -6.72320 -1.38080 0.56980

F -7.40952 -0.18698 -1.08826

F -7.85094 0.41730 0.93031

O -5.52422 1.67113 0.88285

O -4.73727 0.12885 -0.58153

C -3.34313 0.81400 -0.76576

O -3.01677 0.99224 -1.94635

C -2.46141 0.04341 0.17232

F -2.18110 -1.23082 -0.21269

F -2.97297 -0.06259 1.41092

F -1.26878 0.65106 0.28897

### PS<sup>++</sup> (3DPAFIPN<sup>++</sup>)

Charge: +1

Multiplicity: 2

Number of Imaginary Frequencies: 0

Final single point energy -2069.471885850890 Eh

C -0.88105 1.34308 -0.84631

C -1.62858 0.14625 -0.86533

C -1.09657 -0.93679 -1.58666

C 0.10089 -0.83601 -2.27374

C 0.83366 0.36699 -2.25845

C 0.35232 1.46594 -1.52689

N 1.07329 2.65580 -1.48486

F -1.74659 -2.08746 -1.59923

N -2.81435 -0.01310 -0.17276

N 0.55729 -1.95580 -3.00791

C 2.44085 2.62123 -1.11347

C 0.44266 3.86724 -1.86538

C -3.92394 -0.59973 -0.82886

C -2.90293 0.39156 1.18609

C 0.72689 -1.81941 -4.38583  
C 0.80926 -3.13839 -2.32369  
C -4.76559 -1.48262 -0.14476  
C -5.84593 -2.05285 -0.80760  
C -6.08621 -1.76574 -2.15211  
C -5.24074 -0.89022 -2.83061  
C -4.16777 -0.29735 -2.17215  
C -4.03938 1.05912 1.64873  
C -4.10418 1.46084 2.97774  
C -3.03872 1.21586 3.84447  
C -1.90728 0.55101 3.37607  
C -1.83976 0.12673 2.05260  
C 1.22904 -3.07661 -0.97878  
C 1.46742 -4.25182 -0.29120  
C 1.28448 -5.48791 -0.92226  
C 0.85342 -5.54606 -2.25197  
C 0.61040 -4.38243 -2.95859  
C 1.76661 -2.50856 -5.04047  
C 1.93817 -2.33307 -6.40248  
C 1.09319 -1.47772 -7.11515  
C 0.06849 -0.78698 -6.45801  
C -0.11877 -0.94705 -5.09743  
C -0.46675 3.86915 -2.92663  
C -1.11963 5.04770 -3.27749  
C -0.85243 6.23122 -2.59357  
C 0.06995 6.22704 -1.54626  
C 0.71062 5.05180 -1.17286  
C 3.37798 3.42113 -1.77428  
C 4.71738 3.35861 -1.40771  
C 5.13807 2.49141 -0.39899  
C 4.20149 1.69277 0.25371  
C 2.85454 1.76308 -0.08996  
C 2.03977 0.45762 -3.00794  
N 3.01278 0.49383 -3.63342  
C -1.37359 2.45845 -0.10788  
N -1.77346 3.36433 0.49012  
H -4.56866 -1.72303 0.89753  
H -6.49904 -2.73958 -0.27151  
H -6.93137 -2.22005 -2.66606  
H -5.42573 -0.65053 -3.87648

H -3.52490 0.40989 -2.69391  
H -4.85784 1.27421 0.96543  
H -4.98871 1.98562 3.33494  
H -3.09156 1.54213 4.88158  
H -1.07463 0.34739 4.04735  
H -0.96445 -0.40876 1.68906  
H 1.39881 -2.11189 -0.50620  
H 1.81119 -4.21154 0.74007  
H 1.47051 -6.40867 -0.37281  
H 0.68442 -6.50901 -2.72902  
H 0.22376 -4.41961 -3.97375  
H 2.45533 -3.12534 -4.46909  
H 2.75181 -2.84558 -6.91102  
H 1.23825 -1.34067 -8.18492  
H -0.59240 -0.12906 -7.01807  
H -0.92689 -0.43299 -4.58228  
H -0.66175 2.94960 -3.47569  
H -1.83100 5.03994 -4.10190  
H -1.35867 7.15324 -2.87383  
H 0.28045 7.14576 -1.00099  
H 1.40812 5.04580 -0.33833  
H 3.05829 4.07913 -2.57907  
H 5.44219 3.98267 -1.92820  
H 6.18982 2.44097 -0.12301  
H 4.51582 1.01960 1.04985  
H 2.12102 1.15511 0.43678

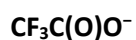

Charge: -1

Multiplicity: 1

Number of Imaginary Frequencies: 0

Final single point energy -526.504451228985 Eh

O -4.62138 0.23228 -0.01146  
C -3.51677 0.79139 -0.03848  
O -3.18551 1.98181 -0.03394  
C -2.33777 -0.23032 -0.08281  
F -2.41939 -1.04800 -1.15305  
F -2.33169 -1.03563 1.00035  
F -1.11838 0.32964 -0.13571

**CF<sub>3</sub>C(O)•**

Charge: 0

Multiplicity: 2

Number of Imaginary Frequencies: 0

Final single point energy -451.041807194817 Eh

C -6.98544 -0.12462 0.17352

C -5.76758 0.82152 0.08369

F -6.72861 -1.07533 1.05885

F -7.18436 -0.67815 -1.01340

F -8.09134 0.51072 0.53878

O -5.77567 1.97548 0.27717

**CO**

Charge: 0

Multiplicity: 1

Number of Imaginary Frequencies: 0

Final single point energy -113.353274270031 Eh

C -5.76773 0.84298 0.08729

O -5.77552 1.95402 0.27357

**CF<sub>3</sub>•**

Charge: 0

Multiplicity: 2

Number of Imaginary Frequencies: 0

Final single point energy -337.658290541734 Eh

C -2.26995 -0.29541 -0.08503

F -2.44574 -1.03016 -1.15797

F -2.35762 -1.01738 1.00697

F -1.13393 0.35863 -0.13519

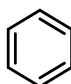

Charge: 0

Multiplicity: 1

Number of Imaginary Frequencies: 0

Final single point energy -232.404069781164 Eh

C -5.60192 0.20850 0.06703

C -4.41554 0.94183 0.04846

C -5.56040 -1.18566 0.05154

C -4.33250 -1.84651 0.01739

C -3.14612 -1.11318 -0.00118  
C -3.18763 0.28098 0.01431  
H -6.56091 0.72466 0.09354  
H -4.44796 2.03066 0.06052  
H -2.18713 -1.62934 -0.02769  
H -2.26106 0.85373 -0.00009  
H -6.48698 -1.75841 0.06594  
H -4.30007 -2.93534 0.00532

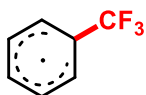

Charge: 0

Multiplicity: 2

Number of Imaginary Frequencies: 0

Final single point energy -570.103923971262 Eh

C -5.94876 -0.48043 0.31832  
C -4.98880 0.41732 -0.04943  
C -5.63376 -1.93030 0.54387  
C -4.19345 -2.27578 0.30188  
C -3.27762 -1.33289 -0.06541  
C -3.64320 0.02311 -0.25282  
H -6.97827 -0.16183 0.47448  
H -5.26372 1.46255 -0.18844  
H -2.24018 -1.63000 -0.21664  
H -2.89607 0.75625 -0.54981  
H -3.89677 -3.31359 0.44573  
C -6.54650 -2.81553 -0.29874  
F -6.36254 -2.62464 -1.60955  
F -7.83900 -2.57676 -0.04433  
F -6.33446 -4.11523 -0.05723  
H -5.90687 -2.20684 1.58097

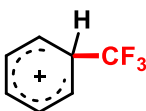

Charge: +1

Multiplicity: 1

Number of Imaginary Frequencies: 0

Final single point energy -569.917260349994 Eh

C -5.95271 -0.48533 0.16604

C -4.97366 0.44951 -0.01604  
C -5.60529 -1.90113 0.34857  
C -4.19949 -2.27846 0.14895  
C -3.24461 -1.31890 -0.03294  
C -3.63282 0.03199 -0.11743  
H -7.00175 -0.20149 0.23638  
H -5.22018 1.50458 -0.10233  
H -2.19627 -1.58824 -0.13221  
H -2.86276 0.78641 -0.27770  
H -3.93876 -3.33425 0.20648  
C -6.61609 -2.88365 -0.24825  
F -6.58456 -2.84409 -1.57796  
F -7.85019 -2.58563 0.14220  
F -6.34598 -4.12735 0.13210  
H -5.72484 -2.02856 1.45698

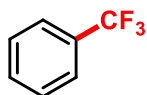

Charge: 0

Multiplicity: 1

Number of Imaginary Frequencies: 0

Final single point energy -569.560708903622 Eh

C -5.90976 -0.49944 -0.05702  
C -4.91099 0.46904 -0.01091  
C -5.55796 -1.84931 -0.08959  
C -4.21687 -2.23440 -0.07601  
C -3.22357 -1.26035 -0.02995  
C -3.56962 0.08969 0.00207  
H -6.95799 -0.20827 -0.06282  
H -5.18172 1.52301 0.01787  
H -2.17638 -1.55729 -0.01618  
H -2.79046 0.84949 0.03994  
H -3.95182 -3.28934 -0.09682  
C -6.62891 -2.89403 -0.18742  
F -6.93333 -3.18310 -1.46355  
F -7.76945 -2.50607 0.39619  
F -6.26429 -4.04738 0.38609

## EtOAc

Charge: 0

Multiplicity: 1

Number of Imaginary Frequencies: 0

Final single point energy -307.855531328024 Eh

C -8.36037 0.29185 0.34410

C -8.19231 -1.02479 -0.37866

H -7.60860 1.00697 -0.01432

H -8.22526 0.16449 1.42570

H -9.35373 0.71755 0.15899

O -9.09561 -2.01987 0.12503

H -7.19490 -1.44416 -0.21196

H -8.35479 -0.91076 -1.45633

C -10.33602 -2.03315 -0.37392

O -10.71571 -1.27378 -1.23056

C -11.16887 -3.09933 0.27121

H -10.66282 -4.06922 0.19874

H -12.14877 -3.14752 -0.20972

H -11.29111 -2.87074 1.33758

## EtOAc(H<sup>+</sup>)

Charge: +1

Multiplicity: 1

Number of Imaginary Frequencies: 0

Final single point energy -308.259452527708 Eh

C -8.25651 0.28160 0.37974

C -8.16929 -0.93568 -0.49902

H -7.48441 0.98680 0.04840

H -8.06260 0.02718 1.42785

H -9.22914 0.77988 0.29718

O -9.12112 -1.97189 -0.03185

H -7.20877 -1.44674 -0.41618

H -8.39464 -0.73391 -1.54948

C -10.33359 -1.98367 -0.37605

O -10.73958 -1.06494 -1.17971

C -11.22607 -3.02752 0.15500

H -10.65378 -3.76091 0.72535

H -11.75873 -3.50996 -0.67428

H -11.97232 -2.54657 0.80355

H -11.68604 -1.15331 -1.40391

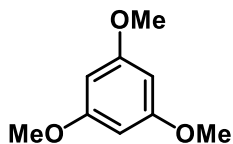

Charge: 0

Multiplicity: 1

Number of Imaginary Frequencies: 0

Final single point energy -576.129819900274 Eh

C -5.77859 1.07312 0.00862

C -5.12988 2.31753 0.02170

C -4.99584 -0.08445 0.00184

C -3.59731 -0.02060 0.00776

C -2.97885 1.23055 0.02067

C -3.73976 2.40382 0.02767

H -3.03796 -0.95043 0.00216

H -6.86043 1.01200 0.00398

O -1.64129 1.39714 0.02731

O -5.79518 3.49050 0.02938

O -5.51782 -1.32775 -0.01088

C -7.20423 3.47982 0.02196

C -0.81496 0.25517 0.01977

C -6.91864 -1.48155 -0.01487

H -7.51910 4.52735 0.02816

H -7.61034 2.97949 0.91276

H -7.60102 2.99284 -0.88036

H 0.21584 0.62119 0.02569

H -0.97469 -0.35296 -0.88206

H -0.97951 -0.36823 0.91026

H -7.10961 -2.55855 -0.02286

H -7.37220 -1.03077 -0.90919

H -7.37593 -1.04330 0.88376

H -3.25074 3.37396 0.03772

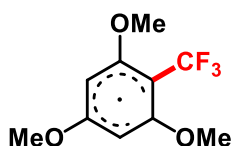

Charge: 0

Multiplicity: 2

Number of Imaginary Frequencies: 0

Final single point energy -913.834056055773 Eh

C -5.49863 1.20962 0.01095

C -4.81547 2.37908 -0.22919  
C -4.78483 -0.00109 0.14780  
C -3.38420 -0.04153 -0.08816  
C -2.68945 1.11113 -0.31738  
C -3.31938 2.46443 -0.14872  
H -2.90462 -1.01557 -0.13198  
H -6.58369 1.21102 0.03782  
O -1.39240 1.19664 -0.66285  
O -5.37591 3.57158 -0.50713  
O -5.36067 -1.19119 0.43407  
C -6.78208 3.65261 -0.56704  
C -0.66523 -0.00254 -0.81413  
C -6.75381 -1.24093 0.62739  
H -7.02273 4.68728 -0.82664  
H -7.23684 3.40785 0.40354  
H -7.18775 2.98064 -1.33720  
H 0.34605 0.28339 -1.11629  
H -1.11088 -0.64211 -1.58962  
H -0.61816 -0.56035 0.13190  
H -6.99578 -2.27898 0.87409  
H -7.30106 -0.95479 -0.28298  
H -7.07054 -0.59253 1.45744  
H -2.94088 3.15249 -0.91970  
C -2.88958 3.09109 1.18711  
F -3.41330 4.30824 1.35945  
F -3.28340 2.34336 2.22593  
F -1.56269 3.22004 1.27755

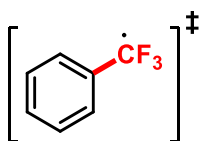

Charge: 0

Multiplicity: 2

Number of Imaginary Frequencies: 1

Final single point energy -570.062384146115 Eh

C -0.81475 0.97229 0.58111  
C 0.09573 1.80223 -0.05680  
C -0.44804 -0.35218 0.91985  
C 0.89954 -0.75288 0.75551  
C 1.79966 0.08734 0.11629

C 1.40039 1.36076 -0.30562  
H -1.82741 1.31803 0.78278  
H -0.20104 2.80823 -0.35088  
H 2.82658 -0.23911 -0.04337  
H 2.11114 2.01634 -0.80655  
H 1.21185 -1.73982 1.09318  
C -1.35742 -1.43065 -0.80488  
F -2.66597 -1.23858 -0.81192  
F -0.82895 -0.94619 -1.91310  
F -1.09467 -2.72350 -0.71233  
H -1.10665 -0.94230 1.55674

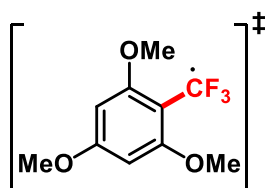

Charge: 0

Multiplicity: 2

Number of Imaginary Frequencies: 1

Final single point energy -913.795051043875 Eh

C -1.28366 -0.08795 -0.15529  
C -0.57799 1.04883 -0.55143  
C -0.58032 -1.28797 0.01112  
C 0.80287 -1.36669 -0.22056  
C 1.48692 -0.22456 -0.60988  
C 0.82470 1.02341 -0.69318  
H 1.29181 -2.32827 -0.10198  
H -2.35552 -0.04840 0.00005  
O 2.80454 -0.18058 -0.86717  
O -1.14599 2.24825 -0.76050  
O -1.16605 -2.43882 0.38718  
C -2.52593 2.40386 -0.51069  
C 3.56887 -1.35282 -0.68373  
C -2.55471 -2.45598 0.63620  
H -2.76042 3.45049 -0.72378  
H -2.76833 2.18598 0.53877  
H -3.12893 1.76052 -1.16682  
H 4.60123 -1.08849 -0.92916  
H 3.23468 -2.15893 -1.35182  
H 3.52165 -1.69928 0.35801  
H -2.80052 -3.48044 0.92962

H -3.12864 -2.19283 -0.26356

H -2.82490 -1.77302 1.45386

H 1.32574 1.86031 -1.17298

C 1.44646 1.91814 1.30732

F 0.35975 2.24128 2.00030

F 2.13973 1.01850 1.99648

F 2.19298 3.00545 1.14365

## 12. References

- (1) Boronin, E. N.; Svetlakova, M. M.; Vorobyov, I. I.; Malysheva, Y. B.; Polushtaytsev, Y. V.; Mensov, S. N.; Vorotyntsev, A. V.; Fedorov, A. Y.; Noël, T.; Nyuchev, A. V. *React. Chem. Eng.* **2024**. doi:10.1039/D4RE00130C
- (2) Martínez, J.; Cortés, J. F.; Miranda, R. *Processes* **2022**, *10*. doi:10.3390/pr10071274
- (3) Fantozzi, N.; Volle, J. N.; Porcheddu, A.; Virieux, D.; García, F.; Colacino, E. *Chem. Soc. Rev.* **2023**, *52*, 6680–6714. doi:10.1039/d2cs00997h
- (4) Kayahan, E.; Jacobs, M.; Braeken, L.; Thomassen, L. C. J.; Kuhn, S.; van Gerven, T.; Leblebici, M. E. *Beilstein J. Org. Chem.* **2020**, *16*, 2484–2504
- (5) Speckmeier, E.; Fischer, T. G.; Zeitler, K. *J. Am. Chem. Soc.* **2018**, *140*, 15353–15365
- (6) Hokamp, T.; Dewanji, A.; Lübbesmeier, M.; Mück-Lichtenfeld, C.; Würthwein, E.-U.; Studer, A. *Angew. Chemie Int. Ed.* **2017**, *56*, 13275–13278. doi:https://doi.org/10.1002/anie.201706534
- (7) Xiong, X.; Tan, F.; Yeung, Y.-Y. *Org. Lett.* **2017**, *19*, 4243–4246. doi:10.1021/acs.orglett.7b01899
- (8) El-Deeb, I. Y.; Tian, M.; Funakoshi, T.; Matsubara, R.; Hayashi, M. *European J. Org. Chem.* **2017**, *2017*, 409–413. doi:https://doi.org/10.1002/ejoc.201601362
- (9) Kang, Y.-F.; Yan, W.-J.; Zhou, T.-W.; Dai, F.; Li, X.-Z.; Bao, X.-Z.; Du, Y.-T.; Yuan, C.-H.; Wang, H.-B.; Ren, X.-R.; Liu, Q.; Jin, X.-L.; Zhou, B.; Zhang, J. *Chem. – A Eur. J.* **2014**, *20*, 8904–8908. doi:https://doi.org/10.1002/chem.201403024
- (10) Beil, S. B.; Müller, T.; Sillart, S. B.; Franzmann, P.; Bomm, A.; Holtkamp, M.; Karst, U.; Schade, W.; Waldvogel, S. R. *Angew. Chemie Int. Ed.* **2018**, *57*, 2450–2454. doi:https://doi.org/10.1002/anie.201712718
- (11) He, Z.-T.; Li, H.; Haydl, A. M.; Whiteker, G. T.; Hartwig, J. F. *J. Am. Chem. Soc.* **2018**, *140*, 17197–17202. doi:10.1021/jacs.8b10076
- (12) Jud, W.; Maljuric, S.; Kappe, C. O.; Cantillo, D. *Org. Lett.* **2019**, *21*, 7970–7975. doi:10.1021/acs.orglett.9b02948
- (13) Hong, J.; Huo, L.; Yang, Y.; Wang, G.; Zheng, C. *ChemistrySelect* **2017**, *2*, 3716–3720. doi:https://doi.org/10.1002/slct.201700789
- (14) Knauber, T.; Arian, F.; Rösenthaler, G.-V.; Gooßen, L. J. *Chem. – A Eur. J.* **2011**, *17*, 2689–2697. doi:https://doi.org/10.1002/chem.201002749
- (15) Keaveney, S. T.; Schoenebeck, F. *Angew. Chemie Int. Ed.* **2018**, *57*, 4073–4077. doi:https://doi.org/10.1002/anie.201800644
- (16) Wang, X.; Xu, Y.; Mo, F.; Ji, G.; Qiu, D.; Feng, J.; Ye, Y.; Zhang, S.; Zhang, Y.; Wang, J. *J. Am. Chem. Soc.* **2013**, *135*, 10330–10333. doi:10.1021/ja4056239
- (17) Lin, X.; Hou, C.; Li, H.; Weng, Z. *Chem. – A Eur. J.* **2016**, *22*, 2075–2084. doi:https://doi.org/10.1002/chem.201504306
- (18) Arimori, S.; Shibata, N. *Org. Lett.* **2015**, *17*. doi:10.1021/acs.orglett.5b00164
- (19) Ye, Y.; Lee, S. H.; Sanford, M. S. *Org. Lett.* **2011**, *13*, 5464–5467. doi:10.1021/ol202174a
- (20) Muralirajan, K.; Kancharla, R.; Bau, J. A.; Taksande, M. R.; Qureshi, M.; Takanabe, K.; Rueping, M. *ACS Catal.* **2021**, *11*, 14772–14780. doi:10.1021/acscatal.1c04053
- (21) Ouyang, Y.; Xu, X.-H.; Qing, F.-L. *Angew. Chemie Int. Ed.* **2018**, *57*, 6926–6929. doi:https://doi.org/10.1002/anie.201803566
- (22) Beatty, J. W.; Douglas, J. J.; Cole, K. P.; Stephenson, C. R. J. *Nat. Commun.* **2015**, *6*, 7919. doi:10.1038/ncomms8919
- (23) Majek, M.; von Wangelin, A. J. *Chem. Commun.* **2013**, *49*, 5507–5509. doi:10.1039/C3CC41867G
- (24) Lemmens, V.; Vos, C.; Bugaev, A. L.; Vercammen, J.; Van Velthoven, N.; Gascon, J.; De Vos, D. E. *ACS Appl. Mater. Interfaces* **2022**, *14*, 971–977. doi:10.1021/acscami.1c19655
- (25) Kariofillis, S. K.; Jiang, S.; Żurański, A. M.; Gandhi, S. S.; Martinez Alvarado, J. I.; Doyle, A. G. *J. Am. Chem. Soc.* **2022**, *144*, 1045–1055. doi:10.1021/jacs.1c12203
- (26) Dolbier Jr, W. R. *Guide to Fluorine NMR for Organic Chemists*; John Wiley & Sons, 2016
- (27) Port, V. C.; Zeoly, L. A.; Coelho, F.; Cormanich, R. A. *Phys. Chem. Chem. Phys.* **2021**, *23*, 9080–9088. doi:10.1039/D0CP05887D
- (28) Seo, S.; Taylor, J. B.; Greaney, M. F. *Chem. Commun.* **2013**, *49*, 6385–6387. doi:10.1039/C3CC41829D
- (29) Wu, X.; Chu, L.; Qing, F.-L. *Tetrahedron Lett.* **2013**, *54*, 249–251. doi:https://doi.org/10.1016/j.tetlet.2012.11.011
- (30) Eisenreich, F.; Palmans, A. R. A. *Chem. – A Eur. J.* **2022**, *28*, e202201322. doi:https://doi.org/10.1002/chem.202201322

- (31) Natte, K.; Jagadeesh, R. V.; He, L.; Rabeah, J.; Chen, J.; Taeschler, C.; Ellinger, S.; Zaragoza, F.; Neumann, H.; Brückner, A.; Beller, M. *Angew. Chemie Int. Ed.* **2016**, *55*, 2782–2786.  
doi:<https://doi.org/10.1002/anie.201511131>
- (32) Eisenreich, F.; Palmans, A. R. A. *Chem. – A Eur. J.* **2022**, *28*, e202201322.  
doi:<https://doi.org/10.1002/chem.202201322>
- (33) Zhang, H.-R.; Feng, C.-C.; Chen, N.; Zhang, S.-L. *Angew. Chemie Int. Ed.* **2022**, *61*, e202209029.  
doi:<https://doi.org/10.1002/anie.202209029>
- (34) Wang, D.; Deng, G.-J.; Chen, S.; Gong, H. *Green Chem.* **2016**, *18*, 5967–5970. doi:10.1039/C6GC02000C
- (35) Hu, R.-B.; Lam, Y.-P.; Ng, W.-H.; Wong, C.-Y.; Yeung, Y.-Y. *ACS Catal.* **2021**, *11*, 3498–3506.  
doi:10.1021/acscatal.0c05684
- (36) Hu, W.-Q.; Pan, S.; Xu, X.-H.; Vivic, D. A.; Qing, F.-L. *Angew. Chemie Int. Ed.* **2020**, *59*, 16076–16082.  
doi:<https://doi.org/10.1002/anie.202004116>
- (37) Khan, B. A.; Buba, A. E.; Gooßen, L. J. *Chem. – A Eur. J.* **2012**, *18*, 1577–1581.  
doi:<https://doi.org/10.1002/chem.201102652>
- (38) Straathof, N. J. W.; Gemoets, H. P. L.; Wang, X.; Schouten, J. C.; Hessel, V.; Noël, T. *ChemSusChem* **2014**, *7*, 1612–1617. doi:<https://doi.org/10.1002/cssc.201301282>
- (39) Singh, K.; Singh, R.; Hazari, A. S.; Adhikari, D. *Chem. Commun.* **2022**, *58*, 4384–4387. doi:10.1039/D2CC00397J
- (40) Xiao, F.; Lin, J.-H.; Hao, F.; Zheng, X.; Guo, Y.; Xiao, J.-C. *Org. Chem. Front.* **2022**, *9*, 1982–1985.  
doi:10.1039/D2QO00067A
- (41) Liang, Y.; Taya, A.; Zhao, Z.; Saito, N.; Shibata, N. *Beilstein J. Org. Chem.* **2020**, *16*, 3052–3058.  
doi:10.3762/bjoc.16.254
- (42) Trofymchuk, S.; Bugera, M. Y.; Klipkov, A. A.; Razhyk, B.; Semenov, S.; Tarasenko, K.; Starova, V. S.; Zaporozhets, O. A.; Tananaiko, O. Y.; Alekseenko, A. N.; Pustovit, Y.; Kiriakov, O.; Gerus, I. I.; Tolmachev, A. A.; Mykhailiuk, P. K. *J. Org. Chem.* **2020**, *85*, 3110–3124. doi:10.1021/acs.joc.9b03011
- (43) Chang, B.; Shao, H.; Yan, P.; Qiu, W.; Weng, Z.; Yuan, R. *ACS Sustain. Chem. Eng.* **2017**, *5*, 334–341.  
doi:10.1021/acssuschemeng.6b01682
- (44) Yang, J.-Y.; Xu, X.-H.; Qing, F.-L. *J. Fluor. Chem.* **2016**, *186*, 45–51.  
doi:<https://doi.org/10.1016/j.jfluchem.2016.04.008>
- (45) Angeli, C.; Bories, B.; Cavallini, A.; Cimraglia, R. *J. Chem. Phys.* **2006**, *124*, 54108. doi:10.1063/1.2148946
- (46) Neese, F. *Wiley Interdiscip. Rev. Comput. Mol. Sci.* **2022**, *12*, 1–15. doi:10.1002/wcms.1606
- (47) Neese, F. *J. Comput. Chem.* **2003**, *24*, 1740–1747. doi:<https://doi.org/10.1002/jcc.10318>
- (48) Neese, F.; Wennmohs, F.; Hansen, A.; Becker, U. *Chem. Phys.* **2009**, *356*, 98–109.  
doi:<https://doi.org/10.1016/j.chemphys.2008.10.036>
- (49) Bykov, D.; Petrenko, T.; Izsák, R.; Kossmann, S.; Becker, U.; Valeev, E.; Neese, F. *Mol. Phys.* **2015**, *113*, 1961–1977. doi:10.1080/00268976.2015.1025114
- (50) Garcia-Ratés, M.; Neese, F. *J. Comput. Chem.* **2019**, *40*, 1816–1828. doi:<https://doi.org/10.1002/jcc.25833>
- (51) Garcia-Ratés, M.; Neese, F. *J. Comput. Chem.* **2020**, *41*, 922–939. doi:<https://doi.org/10.1002/jcc.26139>
- (52) Helmich-Paris, B.; de Souza, B.; Neese, F.; Izsák, R. *J. Chem. Phys.* **2021**, *155*, 104109. doi:10.1063/5.0058766
